# Supplementary material
Source: Royal Society of Chemistry journal article supplement (doi:10.1039/d6qi01242f)
Supplement: d6qi01242f1.pdf [file d6qi01242f1.pdf]

# Three-Component Diazaphospholium Synthesis Enables P(V)-to-P(III) Conversion and Ylide-Mediated CO<sub>2</sub> and CS<sub>2</sub> Activation

Linwei Huang,<sup>a</sup> Jannis Fidelius,<sup>a</sup> Kai Schwedtmann,<sup>a</sup> Philipp Royla,<sup>a</sup> Rosa M. Gomila,<sup>b</sup> Antonio Frontera,<sup>b</sup> and Jan J. Weigand<sup>a,\*</sup>

<sup>a</sup> *Chair of Inorganic Molecular Chemistry, Faculty of Chemistry and Food Chemistry, Technische Universität Dresden, 01069 Dresden, Germany.*

<sup>b</sup> *Department of Chemistry, Universitat de Illes Balears, 07122 Palma de Mallorca, Spain.*

## Contents

|                                                                                    |           |
|------------------------------------------------------------------------------------|-----------|
| <b>S1 General Remarks</b> .....                                                    | <b>4</b>  |
| <b>S2 Synthetic procedures, spectroscopic data and additional remarks</b> .....    | <b>5</b>  |
| S2.1 Preparation of [L <sub>c</sub> PCIPh][OTf] .....                              | 5         |
| S2.2 Preparation of 1[OTf] .....                                                   | 6         |
| S2.3 Preparation of 2[OTf] <sub>2</sub> .....                                      | 8         |
| S2.4 Preparation of 3a[OTf] <sub>2</sub> .....                                     | 10        |
| S2.5 Preparation of 3b[OTf] <sub>2</sub> .....                                     | 12        |
| S2.6 Preparation of 3c[OTf] <sub>2</sub> .....                                     | 14        |
| S2.7 Preparation of 4[OTf] .....                                                   | 16        |
| S2.8 Preparation of 5a[OTf] .....                                                  | 19        |
| S2.9 Preparation of 5b[OTf] .....                                                  | 21        |
| S2.10 Preparation of 6[OTf] <sub>2</sub> .....                                     | 23        |
| S2.11 Preparation of 5c[OTf] .....                                                 | 25        |
| S2.12 Preparation of 7 .....                                                       | 27        |
| S2.13 Preparation of 8 .....                                                       | 29        |
| S2.14 Preparation of 9 .....                                                       | 31        |
| S2.15 Preparation of 10[OTf] .....                                                 | 33        |
| S2.16 Preparation of 11 .....                                                      | 35        |
| S2.17 Preparation of 13[OTf] .....                                                 | 37        |
| S2.18 Preparation of 14[OTf] .....                                                 | 39        |
| S2.19 Preparation of 15[OTf] .....                                                 | 41        |
| S2.20 Preparation of 16[OTf] .....                                                 | 42        |
| S2.21 Preparation of 17[OTf] .....                                                 | 44        |
| S2.22 Preparation of 12 .....                                                      | 46        |
| S2.23 Preparation of 18 .....                                                      | 48        |
| S2.24 Preparation of 19 .....                                                      | 50        |
| S2.25 Preparation of 20 .....                                                      | 51        |
| <b>S3 The diastereomeric configurations analysis for 3a[OTf]<sub>2</sub></b> ..... | <b>53</b> |
| <b>S4 Reaction of 3a-c[OTf]<sub>2</sub> with N-bases</b> .....                     | <b>54</b> |
| S4.1 Reaction of 3a[OTf] <sub>2</sub> with DMAP .....                              | 54        |
| S4.2 Reaction of 3b[OTf] <sub>2</sub> with DMAP .....                              | 55        |
| S4.3 Reaction of 3c[OTf] <sub>2</sub> with DMAP .....                              | 56        |
| S4.4 Reaction of 3a[OTf] <sub>2</sub> with other N-bases .....                     | 56        |

|                                                                                       |           |
|---------------------------------------------------------------------------------------|-----------|
| <b>S5 CO<sub>2</sub> activation.....</b>                                              | <b>57</b> |
| <b>S6 CS<sub>2</sub> activation .....</b>                                             | <b>58</b> |
| <b>S7 X-ray Diffraction Refinements.....</b>                                          | <b>59</b> |
| <b>S8 Computational Details of P(V)-to-P(III) Conversion .....</b>                    | <b>66</b> |
| <b>S8.1 Computational Methodology and Simplifications .....</b>                       | <b>66</b> |
| <b>S8.2 Transition State Geometries .....</b>                                         | <b>67</b> |
| <b>S9 Computational Details of CO<sub>2</sub> and CS<sub>2</sub> activation .....</b> | <b>68</b> |
| <b>References .....</b>                                                               | <b>69</b> |
| <b>Cartesian Coordinates.....</b>                                                     | <b>69</b> |

## S1 General Remarks

Manipulations were performed in a Glovebox MB Unilab or using Schlenk techniques under an atmosphere of purified nitrogen or argon, respectively. All glassware was dried in oven at 160 °C prior to use. Dry, oxygen-free solvents: CH<sub>2</sub>Cl<sub>2</sub>, C<sub>6</sub>H<sub>5</sub>F, CHCl<sub>3</sub>, CH<sub>3</sub>CN were distilled from CaH<sub>2</sub>; *n*-hexane, *n*-pentane, THF, Et<sub>2</sub>O, toluene, benzene were distilled from potassium. Deuterated solvents, CD<sub>2</sub>Cl<sub>2</sub>, C<sub>6</sub>D<sub>6</sub> and CDCl<sub>3</sub> were stored over 4 Å molecular sieves. CD<sub>3</sub>CN was stored over 3 Å molecular sieves. AgOTf was purchased from BLD Pharm and used as received. Paraformaldehyde and potassium bis(trimethylsilyl)amide (KHMDs) were purchased from Sigma Aldrich and used as received. 4-(Dimethylamino)benzotrile, 4-dimethylaminopyridine (DMAP), 4-nitrobenzaldehyde and sulfur were purchased from Sigma Aldrich and purified by sublimation prior to use. 4-Methoxybenzotrile, benzotrile, 4-methylbenzaldehyde, 4-methoxybenzaldehyde, DBU (1, 8-Diazabicyclo[5.4.0]undec-7-ene) and *E*-cinnamaldehyde were purchased from Sigma Aldrich and distilled in an inert atmosphere and stored over 4 Å molecular sieves prior to use. CS<sub>2</sub> was distilled in an inert atmosphere prior to use. [L<sub>c</sub>-TMS][OTf] was synthesized according to literature procedures.<sup>[1]</sup> NMR spectra were measured on a Bruker AVANCE III HD Nanobay 400 MHz UltraShield (<sup>1</sup>H: 400.13 MHz, <sup>13</sup>C: 100.61 MHz, <sup>31</sup>P: 161.98 MHz) or on a Bruker AVANCE III HDX, 500 MHz Ascend (<sup>1</sup>H: 500.13 MHz, <sup>13</sup>C: 125.75 MHz, <sup>31</sup>P: 202.45 MHz). All <sup>13</sup>C NMR spectra were exclusively recorded with composite pulse decoupling. Reported numbers assigning atoms in the <sup>13</sup>C spectra were indirectly deduced from the cross-peaks in 2D correlation experiments (HMBC, HSQC). Chemical shifts were referenced to δ TMS = 0.00 ppm (<sup>1</sup>H, <sup>13</sup>C), δ (H<sub>3</sub>PO<sub>4</sub>, 85%) = 0.00 ppm (<sup>31</sup>P). Chemical shifts (δ) are reported in ppm. Coupling constants (J) are reported in Hz.

Melting points were recorded on an electrothermal melting point apparatus (Büchi Switzerland, Melting point M-560) in sealed capillaries under Nitrogen atmosphere and are uncorrected. Infrared (IR) and Raman spectra were recorded at ambient temperature using a Bruker Vertex 70 instrument equipped with a RAM II module (Nd-YAG laser, 1064 nm). The Raman intensities are reported in percent relative to the most intense peak and are given in parenthesis. An ATR unit (diamond) was used for recording IR spectra. The intensities are reported relative to the most intense peak and are given in parenthesis using the following abbreviations: vw = very weak, w = weak, m = medium, s = strong, vs = very strong. Elemental analysis was performed on a Vario MICRO cube Elemental Analyzer by Elementar Analysatorsysteme GmbH in CHNS modus.

## S2 Synthetic procedures, spectroscopic data and additional remarks

### S2.1 Preparation of [LcPCIPh][OTf]

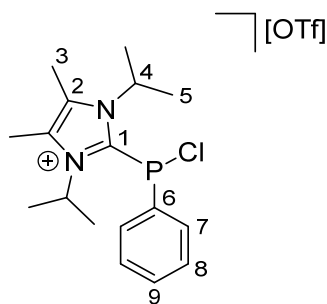

A mixture of [Lc-TMS][OTf] (10.00 g, 24.84 mmol, 1.0 eq.) and PPhCl<sub>2</sub> (11.12 g, 8.43 mL, 62.1 mmol, 2.5 eq.) in PhF (60 mL) was heated at 80 °C in a pressure-sealed tube for 12 h. Removal of all volatiles afforded a sticky oil, which was treated with 10 mL Et<sub>2</sub>O to give a white suspension. The mixture was filtered, and the solid was dried *in vacuo* to afford an analytically pure air- and moisture-sensitive off-white solid.

**Yield:** 15.30 g, 99%; **m.p.:** 67 °C. **<sup>1</sup>H NMR** (500.13 MHz, CDCl<sub>3</sub>, 300 K, [ppm]): δ = 1.62 (12H, m, H5), 2.48 (6H, s, H3), 5.02 (2H, m, H4), 7.51 (1H, m, H9), 7.58 (2H, m, H8), 7.62 (2H, m, H7). **<sup>13</sup>C{<sup>1</sup>H} NMR** (125.76 MHz, CDCl<sub>3</sub>, 300 K, [ppm]): δ = 10.9 (2C, s, C3), 22.4 (4C, s, C5), 53.2 (2C, d, <sup>3</sup>J<sub>CP</sub> = 9 Hz, C4), 120.8 (1C, q, <sup>1</sup>J<sub>CF</sub> = 321 Hz, OTf), 129.3 (2C, d, <sup>2</sup>J<sub>CP</sub> = 20 Hz, C7), 130.0 (2C, d, <sup>3</sup>J<sub>CP</sub> = 4 Hz, C8), 130.9 (1C, d, <sup>1</sup>J<sub>CP</sub> = 27 Hz, C6), 131.3 (1C, d, <sup>4</sup>J<sub>CP</sub> = 2 Hz, C9), 133.3 (2C, brs, C2), 138.7 (1C, d, <sup>1</sup>J<sub>CP</sub> = 88 Hz, C1). **<sup>19</sup>F{<sup>1</sup>H} NMR** (470.59 MHz, CDCl<sub>3</sub>, 300 K, [ppm]): δ = -78.3 (s, OTf). **<sup>31</sup>P{<sup>1</sup>H} NMR** (CDCl<sub>3</sub>, 300 K, in ppm): δ = 46.6 (s).

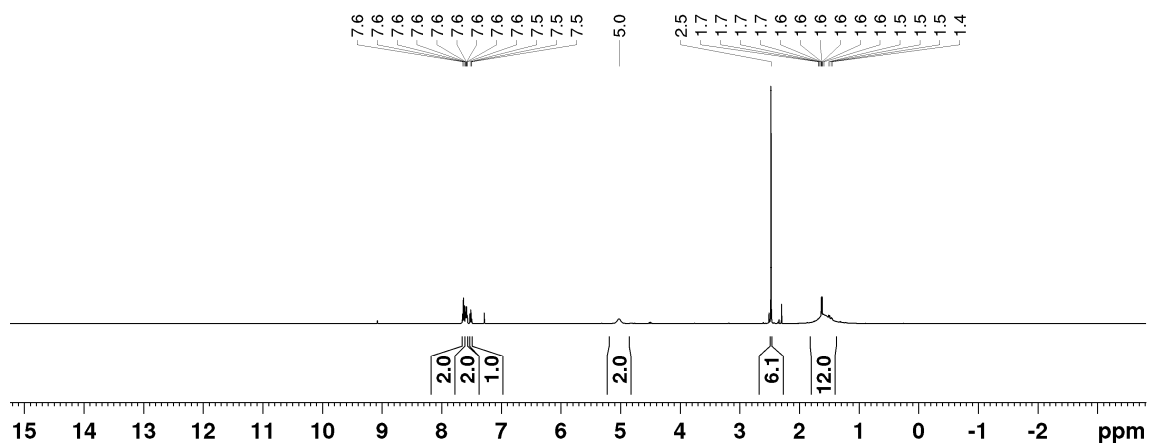

Figure S1. <sup>1</sup>H NMR spectrum of [LcPCIPh][OTf] (300 K, CDCl<sub>3</sub>).



A mixture of [L<sub>c</sub>PClPh][OTf] (200 mg, 0.32 mmol, 1 eq.) and AgOTf (114 mg, 0.44 mmol, 1.05 eq.) in DCM (3 mL) were stirred for 4 h at room temperature. The suspension was filtered to remove AgCl. Removal of all volatiles gave a white, air and moisture sensitive solid.

**Note:** This compound is stable upon storage in glovebox. For the synthesis of azaphospholium salts, isolation of this compound is not necessary; after filtration to remove AgCl, the resulting filtrate was used directly in the cycloaddition reactions.

**Yield:** 240 mg, 97%; **<sup>1</sup>H NMR** (500.13 MHz, CDCl<sub>3</sub>, 300 K, [ppm]): δ = 1.63 (12H, m, H5), 2.54 (6H, s, H3), 4.95 (2H, m, H4), 7.61 (1H, m, H9), 7.66 (4H, m, H8, H7). **<sup>13</sup>C{<sup>1</sup>H} NMR** (125.76 MHz, CDCl<sub>3</sub>, 300 K, [ppm]): δ = 11.4 (2C, s, C3), 21.5 (4C, s, C5), 53.8 (2C, d, <sup>3</sup>J<sub>CP</sub> = 9 Hz, C4), 119.7 (1C, q, <sup>1</sup>J<sub>CF</sub> = 320 Hz, OTf), 128.7 (1C, d, <sup>2</sup>J<sub>CP</sub> = 14 Hz, C6), 129.3 (2C, d, <sup>2</sup>J<sub>CP</sub> = 19 Hz, C7), 130.5 (2C, d, <sup>2</sup>J<sub>CP</sub> = 5 Hz, C8), 132.6 (1C, s, C9), 135.0 (2C, brs, C2), 136.3 (1C, d, <sup>1</sup>J<sub>CP</sub> = 71 Hz, C1). **<sup>31</sup>P{<sup>1</sup>H} NMR** (CDCl<sub>3</sub>, 300 K, in ppm): δ = 113.5 (s). **<sup>19</sup>F{<sup>1</sup>H} NMR** (470.59 MHz, CDCl<sub>3</sub>, 300 K, [ppm]): δ = -76.3 (brs, OTf).

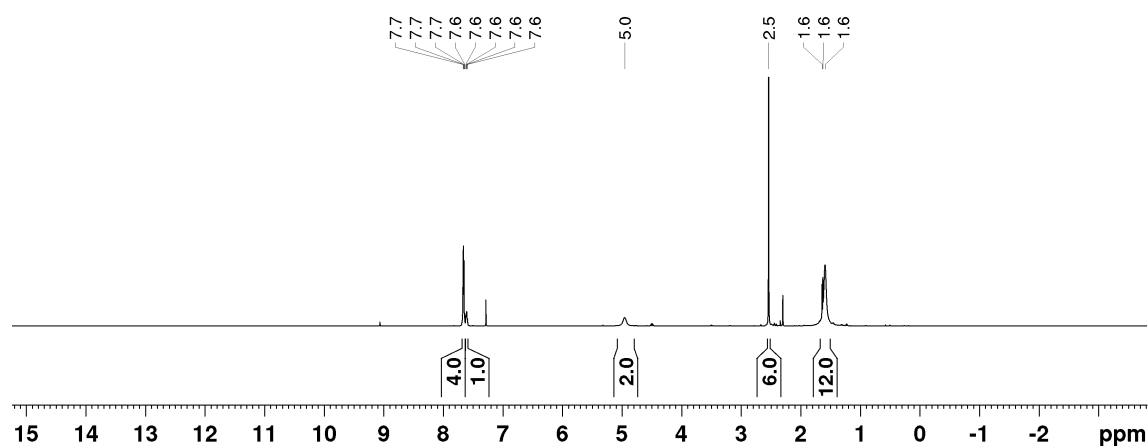

**Figure S5.** <sup>1</sup>H NMR spectrum of 1[OTf] (300 K, CDCl<sub>3</sub>).

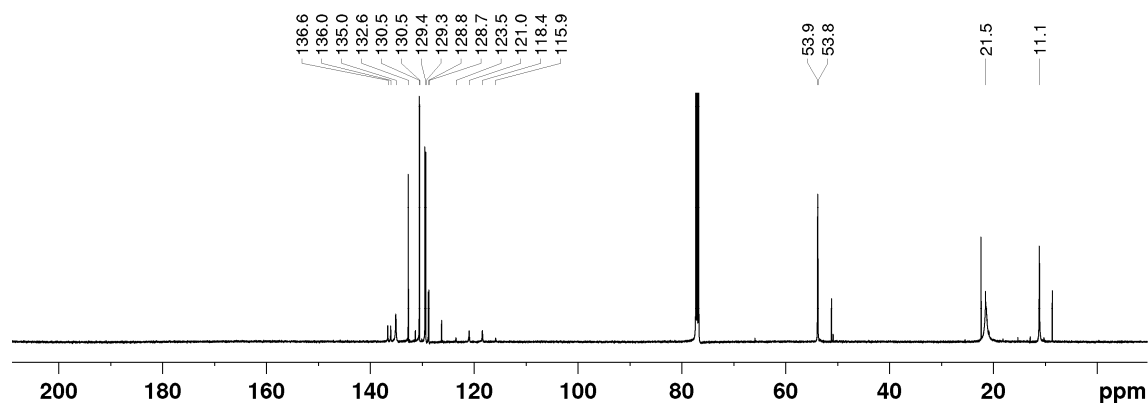

**Figure S6.** <sup>13</sup>C {<sup>1</sup>H} NMR spectrum of 1[OTf] (300 K, CDCl<sub>3</sub>).

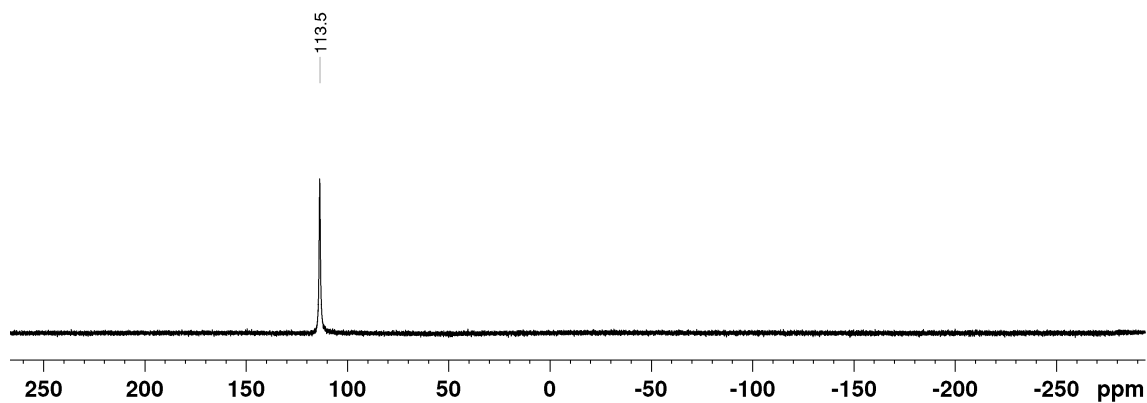

**Figure S7.**  $^{31}\text{P}$   $\{^1\text{H}\}$  NMR spectrum of **1**[OTf] (300 K,  $\text{CDCl}_3$ ).

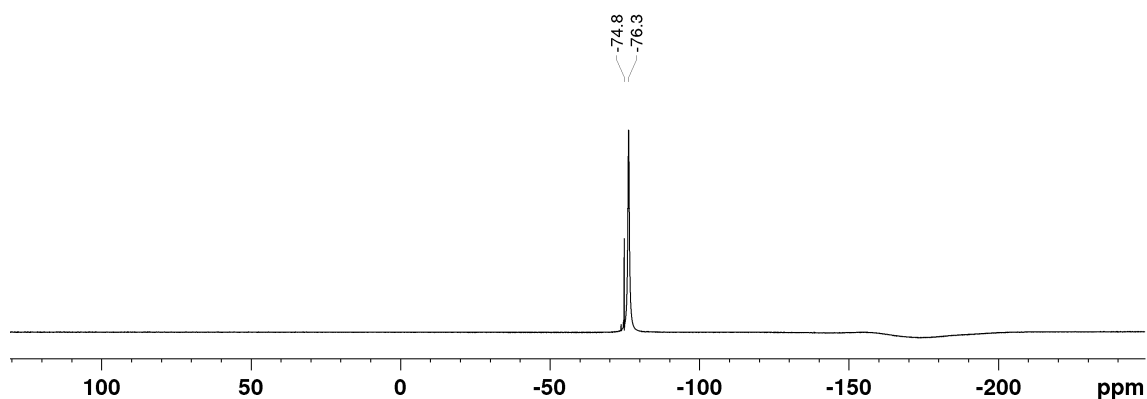

**Figure S8.**  $^{19}\text{F}$   $\{^1\text{H}\}$  NMR spectrum of **1**[OTf] (300 K,  $\text{CDCl}_3$ ). ( $\delta = -74.8$  ppm, AgOTf).

### S2.3 Preparation of **2**[OTf]<sub>2</sub>

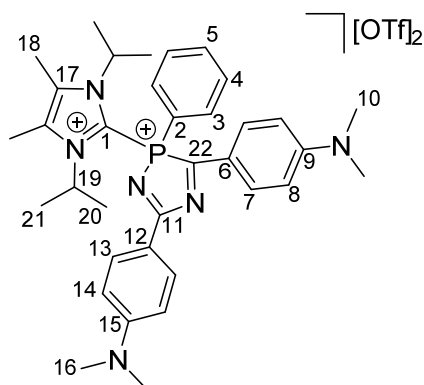

A mixture of  $[\text{LcPClPh}][\text{OTf}]$  (640 mg, 1.35 mmol, 1eq.) and AgOTf (350 mg, 1.35 mmol, 1eq.) in DCM (10 mL) were stirred for 4 h at room temperature. The suspension was filtered to remove AgCl. 4-(Dimethylamino)benzotrile (396 mg, 2.71 mmol) was added to the solution resulting in a deep blue solution and the reaction was allowed to stir for 16 h. Removal of all volatiles results in a blue solid, which was washed with 5 mL  $\text{Et}_2\text{O}$  three times to obtain the product as a blue solid. Suitable crystals for X-ray diffraction analysis can be obtained by layering a DCM solution with  $\text{Et}_2\text{O}$  at  $-30$  °C.

**Yield:** 1.14 g, 96%; **m.p.:** 151 °C. **Raman** (100 mW, 500 scans, 298 K,  $[\text{cm}^{-1}]$ ): 1612 (24), 1459 (8), 1393 (13), 1348 (8), 1313 (11), 1275 (53), 1232 (100), 1180 (16), 1151 (14), 1065 (20), 1033 (6), 992 (7), 957 (18), 912 (53), 843 (11), 759 (8), 739 (7), 701 (5), 618 (10), 429 (5), 346

(6), 169 (5), 75 (8). **IR** (ATR, 298 K, [cm<sup>-1</sup>]): 2958 (vw), 2934 (vw), 1730 (vw), 1598 (m), 1460 (vw), 1414 (w), 1377 (m), 1346 (vw), 1318 (vw), 1260 (s), 1234 (m), 1221 (m), 1145 (vs), 1066 (m), 1027 (s), 953 (w), 937 (w), 907 (w), 878 (vw), 827 (w), 752 (w), 736 (w), 694 (vw), 635 (vs), 563 (m), 515 (m), 469 (w). **<sup>1</sup>H NMR** (400.13 MHz, CD<sub>2</sub>Cl<sub>2</sub>, 300 K, in ppm): δ = 1.37 (6H, d, <sup>3</sup>J<sub>HH</sub> = 6.9 Hz, H21), 1.66 (6H, d, <sup>3</sup>J<sub>HH</sub> = 6.8 Hz, H20), 2.57 (6H, m, H18), 3.29 (6H, m, H16), 3.34 (6H, m, H10), 5.03 (2H, m, H19), 6.95 (4H, m, Ar-H), 7.77 (2H, m, Ar-H), 7.86 (1H, m, Ar-H), 8.21 (4H, m, Ar-H), 8.66 (2H, m, Ar-H), **<sup>13</sup>C{<sup>1</sup>H}** NMR (100.61 MHz, CD<sub>2</sub>Cl<sub>2</sub>, 300 K, in ppm): δ = 11.6 (2C, s, C18), 20.6 (2C, s, C21), 20.9 (2C, s, C20), 40.6 (2C, s, C16), 40.7 (2C, s, C10), 55.8 (2C, s, C19), 114.0 (1C, s, C5), 116.8 (1C, d, <sup>1</sup>J<sub>CP</sub> = 30 Hz, C2), 118.5 (1C, d, <sup>2</sup>J<sub>CP</sub> = 18 Hz, C6), 119.8 (2C, s, C13), 120.8 (2C, s, C4), 122.4 (2C, q, <sup>3</sup>J<sub>CF</sub> = 320 Hz, OTf), 125.0 (2C, s, C14), 126.1 (2C, s, C8), 129.1 (1C, d, <sup>1</sup>J<sub>CP</sub> = 20 Hz, C1), 130.4 (1C, d, <sup>3</sup>J<sub>CP</sub> = 5 Hz, C12), 131.2 (2C, d, <sup>3</sup>J<sub>CP</sub> = 15 Hz, C4), 131.8 (2C, d, <sup>3</sup>J<sub>CP</sub> = 13 Hz, C7), 136.5 (2C, d, <sup>2</sup>J<sub>CP</sub> = 3 Hz, C3), 136.8 (2C, d, <sup>3</sup>J<sub>CP</sub> = 4 Hz, C17), 156.7 (1C, s, C15), 157.2 (1C, s, C9), 170.4 (1C, d, <sup>2</sup>J<sub>CP</sub> = 9 Hz, C11), 183.3 (1C, d, <sup>1</sup>J<sub>CP</sub> = 12 Hz, C22). **<sup>19</sup>F NMR** (376.5 MHz, CD<sub>2</sub>Cl<sub>2</sub>, 300 K, in ppm): δ = -78.6 (s, OTf). **<sup>31</sup>P{<sup>1</sup>H}** NMR (100.61 MHz, CD<sub>2</sub>Cl<sub>2</sub>, 300 K, in ppm): δ = 46.8 (s). **Elemental analysis:** calculated for C<sub>37</sub>H<sub>45</sub>F<sub>6</sub>N<sub>6</sub>O<sub>6</sub>PS<sub>2</sub>: C, 50.56; H, 5.16; N, 9.56; S, 7.30; found: C, 50.03; H, 5.132; N, 9.29; S, 7.724.

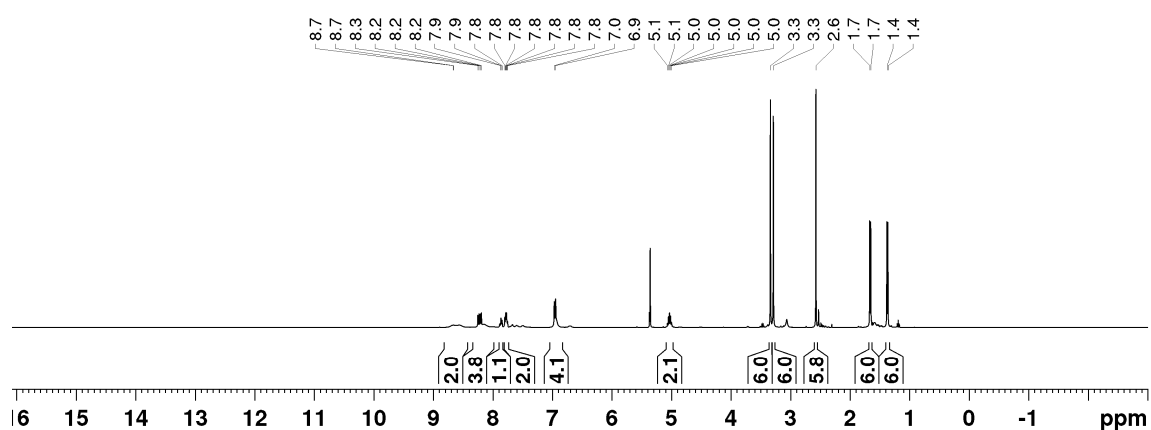

**Figure S9.** <sup>1</sup>H NMR spectrum of 2[OTf]<sub>2</sub> (300 K, CD<sub>2</sub>Cl<sub>2</sub>).

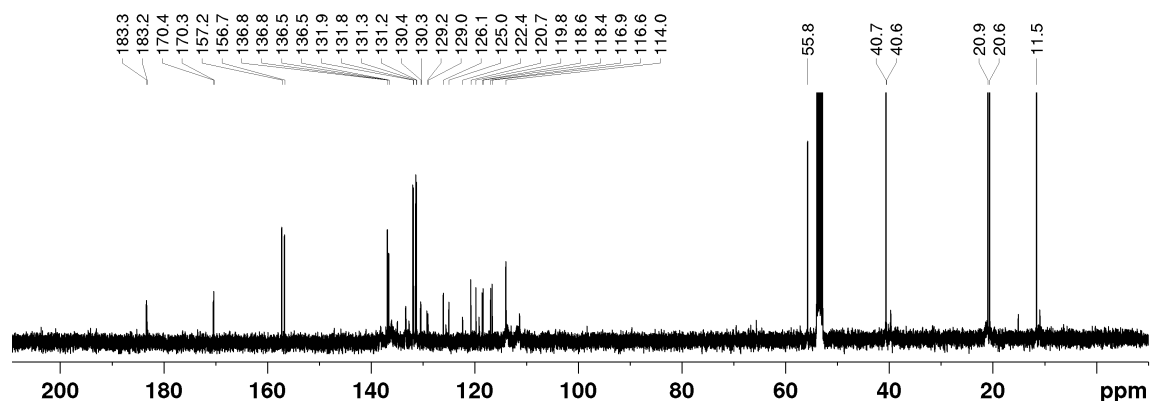

**Figure S10.** <sup>13</sup>C{<sup>1</sup>H} NMR spectrum of 2[OTf]<sub>2</sub> (300 K, CD<sub>2</sub>Cl<sub>2</sub>).

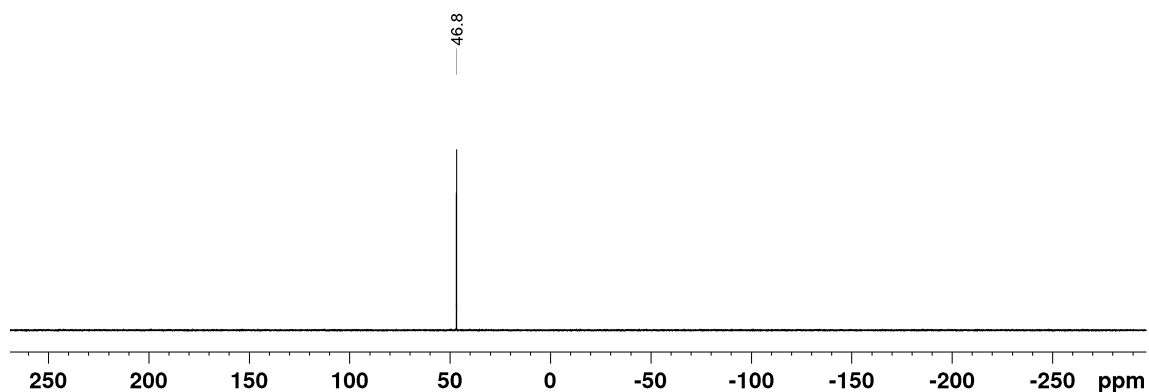

**Figure S11.**  $^{31}\text{P}\{^1\text{H}\}$  NMR spectrum of  $2[\text{OTf}]_2$  (300 K,  $\text{CD}_2\text{Cl}_2$ ).

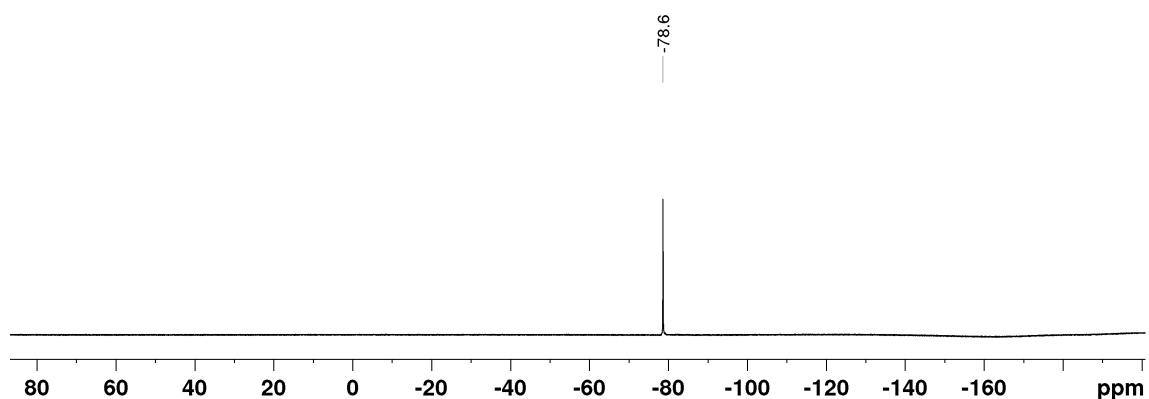

**Figure S12.**  $^{19}\text{F}\}$  NMR spectrum of  $2[\text{OTf}]_2$  (300 K,  $\text{CD}_2\text{Cl}_2$ ).

## S2.4 Preparation of $3a[\text{OTf}]_2$

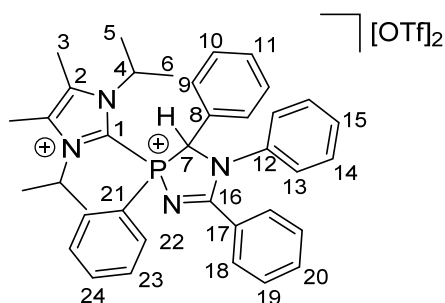

A mixture of  $[\text{LcPClPh}][\text{OTf}]$  (6.00 g, 12.69 mmol, 1 eq.) and  $\text{AgOTf}$  (3.26 g, 12.69 mmol, 1 eq.) in DCM (80 mL) was stirred at room temperature for 16 h to afford a suspension. The suspension was filtered to remove  $\text{AgCl}$  and obtain the solution of  $1[\text{OTf}]$ . Benzonitrile (1.31 g, 1.3 mL, 12.69 mmol, 1 eq.) and *N*-benzylideneaniline (2.3 g, 12.69 mmol, 1 eq.) were added to the filtrate. The resulting yellow solution was heated at  $80\text{ }^\circ\text{C}$  in a pressure-sealed tube for 12 h. Removal of all volatiles gave a yellow viscous oil. Addition of *n*-pentane (20 mL) to the residue afforded a yellow suspension, which was filtrated, washed with  $\text{Et}_2\text{O}$  (20 mL), and dried *in vacuo* to obtain a white, air and moisture sensitive solid. Suitable crystals for X-ray diffraction analysis can be obtained by layering a DCM solution with  $\text{Et}_2\text{O}$  at  $-30\text{ }^\circ\text{C}$ . See **S3** for details of the diastereomeric configuration analysis.

**Yield:** 9.32 g, 84%. **m.p.**  $208\text{ }^\circ\text{C}$ . **Raman** (100 mW, 50 scans, 298 K,  $[\text{cm}^{-1}]$ ): No Raman spectrum could be obtained due to fluorescence of the compound. **IR** (ATR, 298 K,  $[\text{cm}^{-1}]$ ):

3062 (vw), 3001 (vw), 2988 (vw), 2947 (vw), 2942 (vw), 2900 (vw), 1601 (vw), 1583 (vw), 1494 (w), 1473 (w), 1460 (w), 1419 (w), 1375 (w), 1276 (s), 1254 (vs), 1224 (m), 1189 (w), 1142 (s), 1110 (m), 1092 (w), 1083 (w), 1028 (vs), 996 (w), 947 (vw), 931 (vw), 900 (m), 850 (vw), 834 (vw), 800 (w), 794 (w), 782 (w), 763 (w), 754 (w), 732 (w), 722 (vw), 709 (m), 698 (m), 665 (vw), 635 (vs), 590 (w), 572 (m), 539 (vw), 516 (s), 490 (s), 468 (w), 449 (vw). **<sup>1</sup>H NMR** (500.13 MHz, CD<sub>2</sub>Cl<sub>2</sub>, 300 K, in ppm): δ = 1.75 (H6, d, <sup>3</sup>J<sub>HH</sub> = 6.8 Hz, 6H), 1.83 (H5, d, <sup>3</sup>J<sub>HH</sub> = 7.0 Hz, 6H), 2.59 (H3, s, 6H), 5.19 (H4, m, 2H), 6.87 (H7, d, <sup>2</sup>J<sub>HP</sub> = 11.0 Hz, 1H), 7.25 (Ar-H, m, 5H), 7.35 (Ar-H, m, 5H), 7.42 (Ar-H, m, 2H), 7.56 (Ar-H, m, 1H), 7.78 (Ar-H, m, 5H), 7.83 (Ar-H, m, 1H), 7.90 (Ar-H, m, 1H). **<sup>13</sup>C{<sup>1</sup>H} NMR** (125.76 MHz, CD<sub>2</sub>Cl<sub>2</sub>, 300 K, in ppm) : δ = 11.5 (2C, s, C3), 20.9 (2C, s, C5), 20.9 (2C, s, C6), 56.1 (2C, s, C4), 71.5 (1C, d, <sup>1</sup>J<sub>CP</sub> = 48.5 Hz, C7), 116.9 (1C, d, <sup>1</sup>J<sub>CP</sub> = 108.4 Hz, C21), 120.8 (2C, q, <sup>1</sup>J<sub>CF</sub> = 322 Hz, OTf), 128.0 (2C, s, C13), 128.4 (1C, s, C15), 129.1 (1C, d, <sup>3</sup>J<sub>CP</sub> = 5.8 Hz, C17), 129.6 (2C, s, C9), 129.7 (1C, d, <sup>1</sup>J<sub>CP</sub> = 99.5 Hz, C1), 130.1 (2C, s, C10), 130.1 (1C, s, C11), 130.5 (1C, s, C14), 130.9 (2C, s, C18), 131.3 (2C, s, C19), 131.3 (1C, s, C24), 133.3 (1C, s, C20), 133.3 (1C, s, C24), 133.4 (2C, s, C22), 136.5 (1C, d, <sup>3</sup>J<sub>CP</sub> = 4.9 Hz, C8), 136.5 (2C, s, C23), 136.6 (2C, s, C2), 137.6 (1C, d, <sup>3</sup>J<sub>CP</sub> = 3.3 Hz, C12), 178.6 (1C, d, <sup>3</sup>J<sub>CP</sub> = 6.0 Hz, C16). Only the resonance of the major diastereomer are given. **<sup>19</sup>F{<sup>1</sup>H} NMR** (470.59 MHz, CD<sub>2</sub>Cl<sub>2</sub>, 300 K, in ppm): δ = -78.8 (s, OTf). **<sup>31</sup>P{<sup>1</sup>H} NMR** (202.46 MHz, CD<sub>2</sub>Cl<sub>2</sub>, 300 K, in ppm): δ = 55.0 (s) (93%), 60.2 (s) (7%). **Elemental analysis:** calculated for C<sub>39</sub>H<sub>41</sub>F<sub>6</sub>N<sub>4</sub>O<sub>6</sub>PS<sub>2</sub>: C, 53.79; H, 4.75; N, 6.43; S, 7.36; found: C, 53.53; H, 4.538; N, 6.42; S, 7.321.

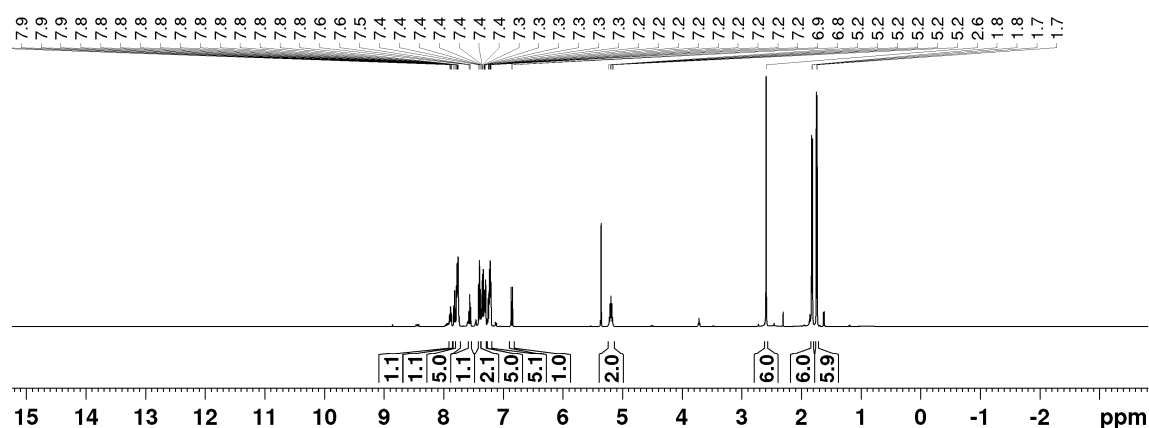

**Figure S13.** <sup>1</sup>H NMR spectrum of **3a**[OTf]<sub>2</sub> (300 K, CD<sub>2</sub>Cl<sub>2</sub>).

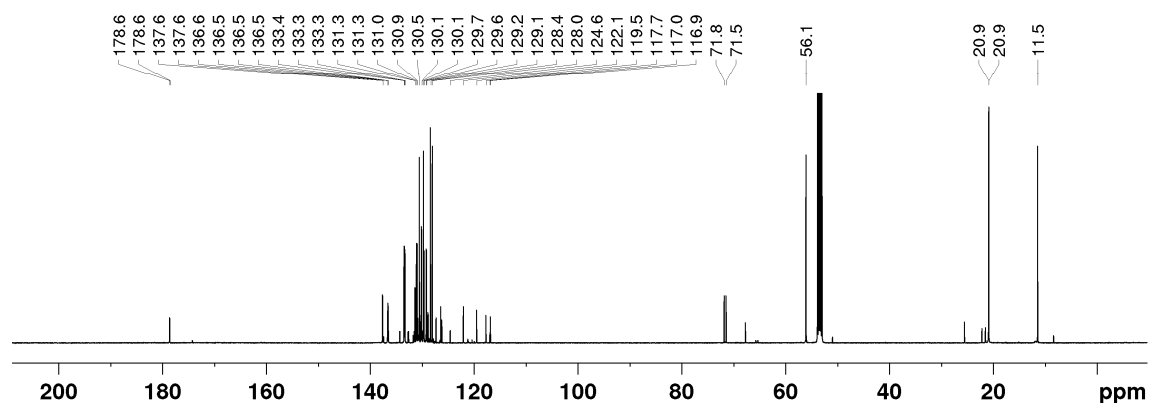

**Figure S14.** <sup>13</sup>C{<sup>1</sup>H} NMR spectrum of **3a**[OTf]<sub>2</sub> (300 K, CD<sub>2</sub>Cl<sub>2</sub>).

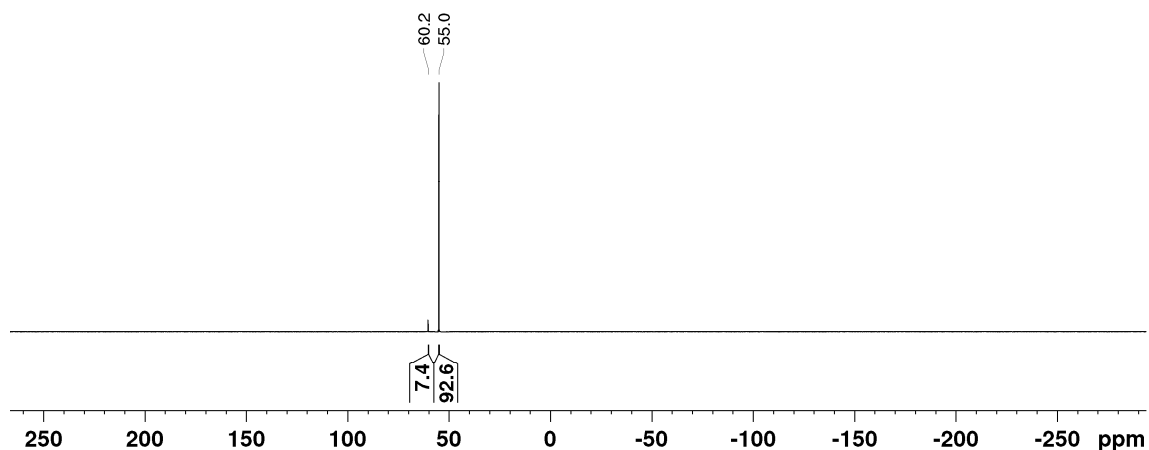

Figure S15.  $^{31}\text{P}\{^1\text{H}\}$  NMR spectrum of  $3\mathbf{a}[\text{OTf}]_2$  (300 K,  $\text{CD}_2\text{Cl}_2$ ).

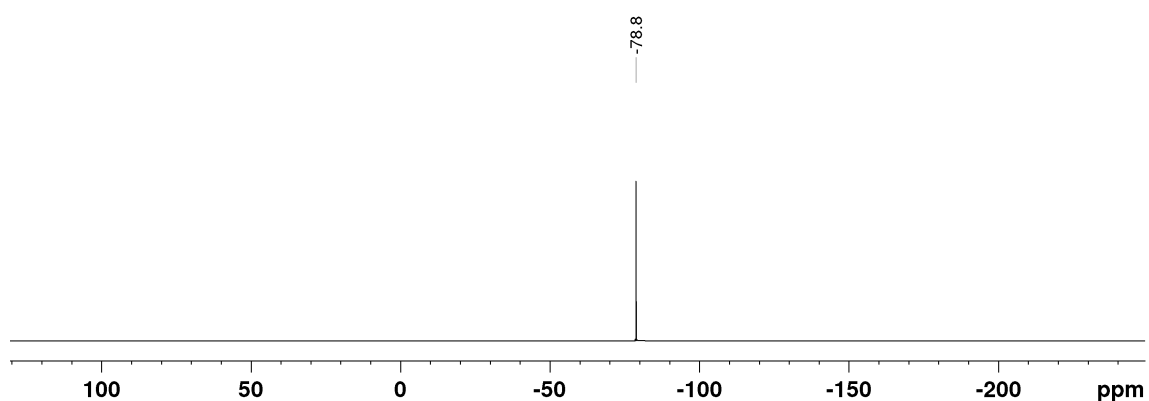

Figure S16.  $^{19}\text{F}\}$  NMR spectrum of  $3\mathbf{a}[\text{OTf}]_2$  (300 K,  $\text{CD}_2\text{Cl}_2$ ).

## S2.5 Preparation of $3\mathbf{b}[\text{OTf}]_2$

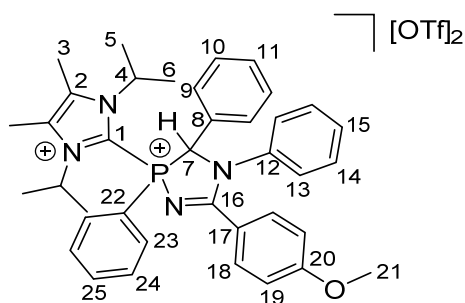

A mixture of  $[\mathbf{L}_c\text{PClPh}][\text{OTf}]$  (500 mg, 1.06 mmol, 1 eq.) and  $\text{AgOTf}$  (272 mg, 1.06 mmol, 1 eq.) in DCM (10 mL) was stirred at room temperature for 16 h to afford a suspension. The mixture was filtered to remove  $\text{AgCl}$  and obtain the solution of  $1[\text{OTf}]$ . 4-Methoxybenzonitrile (141 mg, 1.06 mmol, 1 eq.) and *N*-benzylideneaniline (192 mg, 1.06 mmol, 1 eq.) were added to the filtrate. The resulting yellow solution was heated at  $80^\circ\text{C}$  in a pressure-sealed tube for 12 h. Removal of all volatiles gave a pale-yellow solid, which was washed with  $\text{Et}_2\text{O}$  (4 mL) to afford a white solid. The product was collected by filtration and dried *in vacuo* to yield a white, air and moisture sensitive solid. Suitable crystals for X-ray diffraction analysis can be obtained by layering a DCM solution with  $\text{Et}_2\text{O}$  at room temperature.

**Yield:** 746 mg, 78%. **m.p.**  $192^\circ\text{C}$  (decomp.). **Raman** (100 mW, 50 scans, 298 K,  $[\text{cm}^{-1}]$ ): 3068 (29), 2990 (10), 2946 (24), 1608 (100), 1582 (25), 1525 (34), 1464 (16), 1445 (20), 1428 (62),

1410 (39), 1313 (13), 1278 (19), 1265 (24), 1207 (16), 1185 (30), 1160 (13), 1150 (11), 1032 (36), 1002 (34), 803 (15), 754 (9), 573 (9), 348 (10), 313 (9), 261 (10), 213 (10), 153 (19), 81 (99). **IR** (ATR, 298 K, [cm<sup>-1</sup>]): 2361 (w), 2342 (vw), 1607 (w), 1581 (vw), 1495 (vw), 1452 (w), 1428 (m), 1407 (m), 1256 (vs), 1222 (m), 1180 (w), 1142 (s), 1109 (m), 1029 (vs), 996 (w), 947 (w), 912 (m), 850 (vw), 800 (w), 787 (w), 762 (w), 747 (w), 721 (vw), 708 (w), 691 (w), 652 (vw), 635 (vs), 585 (w), 571 (w), 516 (s), 497 (w), 484 (m), 445 (vw). **<sup>1</sup>H NMR** (500.13 MHz, CD<sub>2</sub>Cl<sub>2</sub>, 300 K, in ppm): δ = 1.73 (6H, d, <sup>3</sup>J<sub>HH</sub> = 6.7 Hz, H6), 1.81 (6H, d, <sup>3</sup>J<sub>HH</sub> = 6.9 Hz, H5), 2.58 (6H, s, H3), 3.86 (3H, s, H21), 5.21 (2H, br, H4), 6.79 (1H, d, <sup>2</sup>J<sub>HP</sub> = 11.0 Hz, H7), 6.88 (2H, m, H19), 7.20 (2H, m, Ar-H), 7.27 (3H, m, Ar-H), 7.33 (5H, m, Ar-H), 7.73 (5H, m, Ar-H), 7.85 (2H, m, Ar-H). **<sup>13</sup>C{<sup>1</sup>H} NMR** (125.76 MHz, CD<sub>2</sub>Cl<sub>2</sub>, 300 K, in ppm): δ = 11.5 (2C, s, C3), 20.9 (4C, m, C5, C6), 55.6 (1C, s, C21), 56.0 (2C, s, C4), 71.7 (1C, d, <sup>2</sup>J<sub>CP</sub> = 48 Hz, C7), 113.8 (2C, s, C19), 118.0 (1C, d, <sup>1</sup>J<sub>CP</sub> = 110 Hz, C22), 120.4 (1C, d, <sup>3</sup>J<sub>CP</sub> = 20 Hz, C17), 120.8 (2C, q, <sup>1</sup>J<sub>CF</sub> = 321 Hz, OTf), 126.8 (1C, s, C11), 127.5 (1C, s, <sup>1</sup>J<sub>CP</sub> = 64 Hz, C1), 128.0 (2C, s, C13), 129.1 (2C, s, C9), 129.1 (1C, s, C12), 129.5 (1C, s, C15), 129.8 (2C, s, C14), 130.0 (2C, s, C24), 130.9 (2C, d, <sup>2</sup>J<sub>CP</sub> = 14 Hz, C23), 131.2 (2C, s, C10), 133.3 (1C, d, <sup>2</sup>J<sub>CP</sub> = 12 Hz, C8), 133.5 (2C, s, C18), 136.2 (2C, d, <sup>3</sup>J<sub>CP</sub> = 4 Hz, C2), 137.4 (1C, s, C25), 164.0 (1C, s, C20), 177.5 (1C, d, <sup>1</sup>J<sub>CP</sub> = 5 Hz, C16). Only the resonances of the major diastereomer are given. **<sup>31</sup>P{<sup>1</sup>H} NMR** (202.46 MHz, CD<sub>2</sub>Cl<sub>2</sub>, 300 K, in ppm): δ = 59.2 (s) (15%), 53.3 (s) (85%). **<sup>19</sup>F{<sup>1</sup>H} NMR** (470.59 MHz, CD<sub>2</sub>Cl<sub>2</sub>, 300 K, in ppm): δ = -78.8 (s, OTf). **Elemental analysis:** calculated for C<sub>40</sub>H<sub>43</sub>F<sub>6</sub>N<sub>4</sub>O<sub>7</sub>PS<sub>2</sub>: C, 53.33; H, 4.81; N, 6.22; S, 7.12; found: C, 53.23; H, 4.982; N, 6.08; S, 7.265.

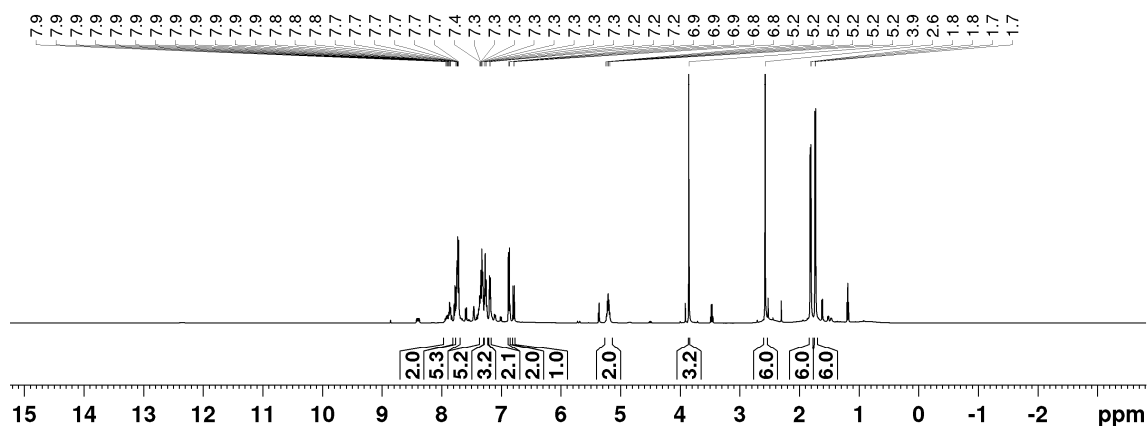

**Figure S17.** <sup>1</sup>H NMR spectrum of **3b**[OTf]<sub>2</sub> (300 K, CD<sub>2</sub>Cl<sub>2</sub>).

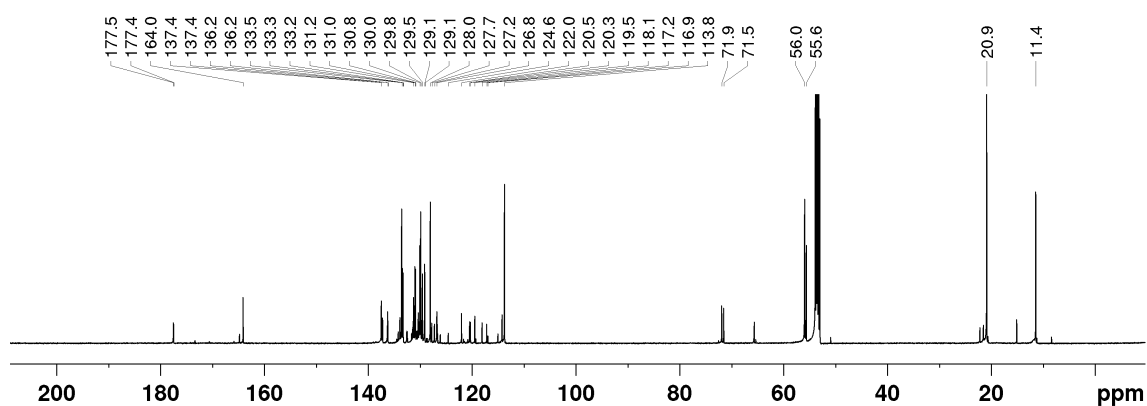

**Figure S18.** <sup>13</sup>C{<sup>1</sup>H} NMR spectrum of **3b**[OTf]<sub>2</sub> (300 K, CD<sub>2</sub>Cl<sub>2</sub>).

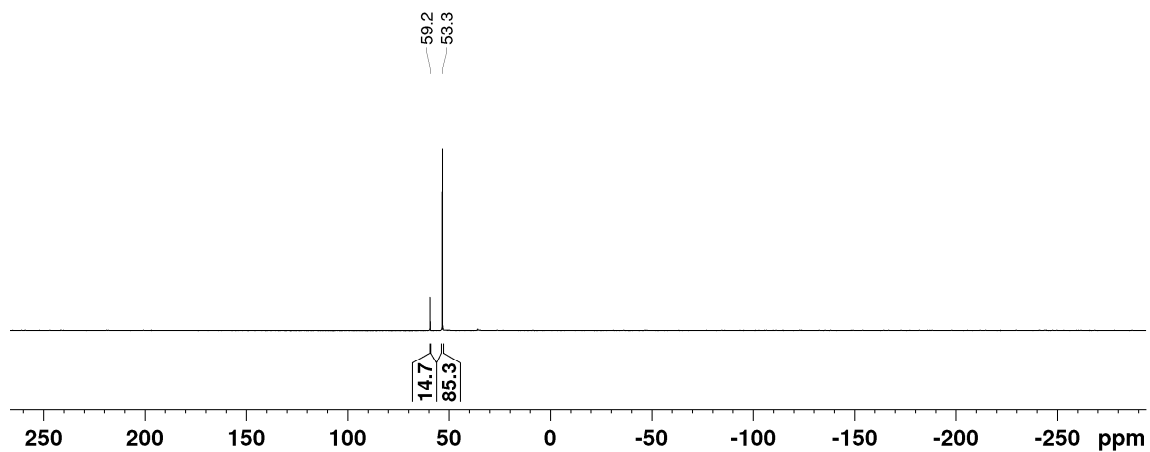

**Figure S19.**  $^{31}\text{P}\{\text{H}\}$  NMR spectrum of **3b**[OTf] $_2$  (300 K,  $\text{CD}_2\text{Cl}_2$ ).

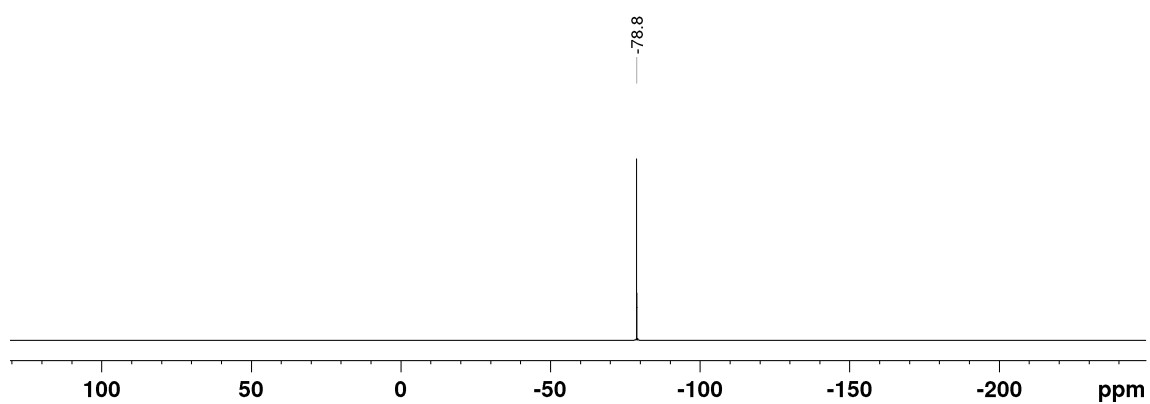

**Figure S20.**  $^{19}\text{F}\{\text{H}\}$  NMR spectrum of **3b**[OTf] $_2$  (300 K,  $\text{CD}_2\text{Cl}_2$ ).

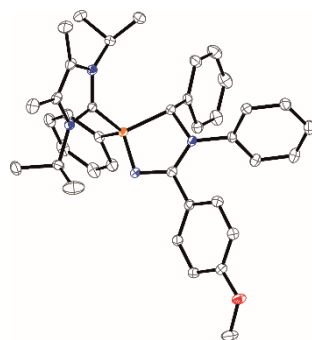

**Figure S21.** Molecular structure of *anti*-**3b** $^{2+}$  in *anti*-**3b**[OTf] $_2$ ; hydrogen atoms and the anion are omitted for clarity and thermal ellipsoids are displayed at 50% probability (100 K).

## S2.6 Preparation of **3c**[OTf] $_2$

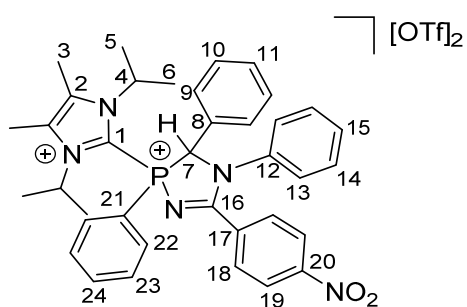

A mixture of [L<sub>c</sub>PCIPh][OTf] (500 mg, 1.06 mmol, 1 eq.) and AgOTf (272 mg, 1.06 mmol, 1 eq.) in DCM (10 mL) was stirred at room temperature for 16 h to afford a suspension. The mixture was filtered to remove AgCl and obtain the solution of **1**[OTf]. 4-Nitrobenzonitrile (157 mg, 1.06 mmol, 1 eq.) and *N*-benzylideneaniline (192 mg, 1.06 mmol, 1 eq.) were added to the filtrate. The resulting yellow solution was heated at 80 °C in a pressure-sealed tube for 12 h. Removal of all volatiles gave a yellow solid, which was washed with Et<sub>2</sub>O (4 mL) and PhF (1 mL) to afford a white solid. The product was collected by filtration and dried *in vacuo* to yield a white, air and moisture sensitive solid.

**Yield:** 767 mg, 73%. **m.p.** 197.9 °C (decomp.). **Raman** (100 mW, 50 scans, 298 K, [cm<sup>-1</sup>]): 3071 (30), 2958 (28), 1603 (100), 1584 (66), 1433 (70), 1350 (80), 1278 (71), 1108 (74), 1034 (77), 1002 (82). **IR** (ATR, 298 K, [cm<sup>-1</sup>]): 2361 (w), 2341 (w), 1526 (w), 1495 (vw), 1474 (w), 1434 (w), 1402 (vw), 1348 (w), 1278 (m), 1257 (vs), 1224 (w), 1150 (m), 1109 (w), 1031 (s), 1016 (vw), 906 (w), 861 (vw), 792 (vw), 757 (w), 741 (vw), 734 (vw), 709 (w), 697 (w), 691 (w), 636 (vs), 573 (w), 517 (m), 491 (w). **<sup>1</sup>H NMR** (400.13 MHz, CD<sub>2</sub>Cl<sub>2</sub>, 300 K, in ppm): δ = 1.73 (6H, d, <sup>3</sup>J<sub>HH</sub> = 6.7 Hz, H5), 1.84 (6H, d, <sup>3</sup>J<sub>HH</sub> = 6.9 Hz, H6), 2.61 (6H, s, H3), 5.17 (2H, sept, <sup>3</sup>J<sub>HH</sub> = 6.7 Hz, H4), 6.92 (1H, d, <sup>2</sup>J<sub>HP</sub> = 11.2 Hz, H7), 7.23 (3H, m, H9, H11), 7.32 (5H, m, H15, H22, H13), 7.42 (2H, m, H14), 7.79 (2H, m, H10), 7.89 (1H, m, H24), 7.92 (2H, m, H23), 8.07 (2H, d, <sup>3</sup>J<sub>HH</sub> = 8.9 Hz, H18), 8.18 (2H, d, <sup>3</sup>J<sub>HH</sub> = 8.9 Hz, H19). **<sup>13</sup>C{<sup>1</sup>H} NMR** (125.76 MHz, CD<sub>2</sub>Cl<sub>2</sub>, 300 K, in ppm): δ = 11.5 (2C, s, C3), 20.9 (2C, s, C6), 20.9 (2C, s, C5), 56.3 (2C, s, C4), 71.7 (1C, d, <sup>1</sup>J<sub>CP</sub> = 49 Hz, C7), 116.7 (1C, d, <sup>1</sup>J<sub>CP</sub> = 107 Hz, C21), 120.8 (2C, q, <sup>1</sup>J<sub>CF</sub> = 321 Hz, OTf), 123.2 (2C, s, C19), 125.7 (1C, d, <sup>3</sup>J<sub>CP</sub> = 2 Hz, C17), 126.8 (1C, d, <sup>1</sup>J<sub>CP</sub> = 131 Hz, C1), 128.0 (2C, s, C14), 129.4 (2C, d, <sup>3</sup>J<sub>CP</sub> = 5 Hz, C9), 129.9 (2C, s, C13), 129.9 (2C, s, C10), 130.1 (1C, s, C11), 131.1 (2C, d, <sup>2</sup>J<sub>CP</sub> = 15 Hz, C22), 131.3 (2C, s, C15), 131.7 (2C, s, C18), 133.8 (2C, d, <sup>3</sup>J<sub>CP</sub> = 13 Hz, C23), 135.0 (1C, d, <sup>2</sup>J<sub>CP</sub> = 20 Hz, C8), 135.6 (1C, d, <sup>3</sup>J<sub>CP</sub> = 10 Hz, C12), 136.6 (2C, d, <sup>3</sup>J<sub>CP</sub> = 5 Hz, C2), 137.9 (1C, d, <sup>4</sup>J<sub>CP</sub> = 3 Hz, C24), 149.8 (1C, s, C20), 176.9 (1C, d, <sup>2</sup>J<sub>CP</sub> = 6 Hz, C16). **<sup>31</sup>P{<sup>1</sup>H} NMR** (161.98 MHz, CD<sub>2</sub>Cl<sub>2</sub>, 300 K, in ppm): δ = 56.9 (s). **<sup>19</sup>F{<sup>1</sup>H} NMR** (376.5 MHz, CD<sub>2</sub>Cl<sub>2</sub>, 300 K, in ppm): δ = -78.7 (s, OTf). **Elemental analysis:** calculated for C<sub>39</sub>H<sub>40</sub>F<sub>6</sub>N<sub>5</sub>O<sub>8</sub>PS<sub>2</sub> 0.35 CH<sub>2</sub>Cl<sub>2</sub>: C, 49.98; H, 4.34; N, 7.41; S, 6.78; found: C, 49.61; H, 4.577; N, 7.37; S, 7.308.

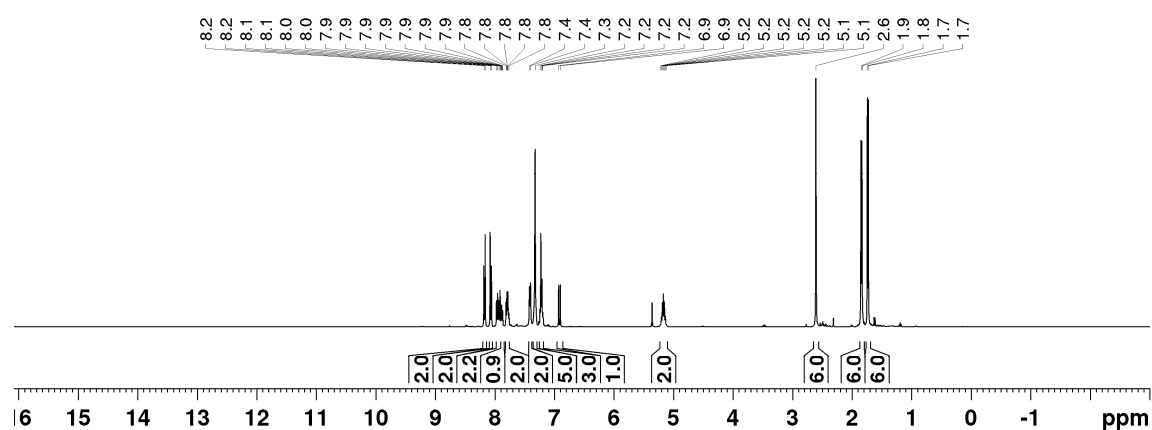

**Figure S22.** <sup>1</sup>H NMR spectrum of **3c**[OTf]<sub>2</sub> (300 K, CD<sub>2</sub>Cl<sub>2</sub>).

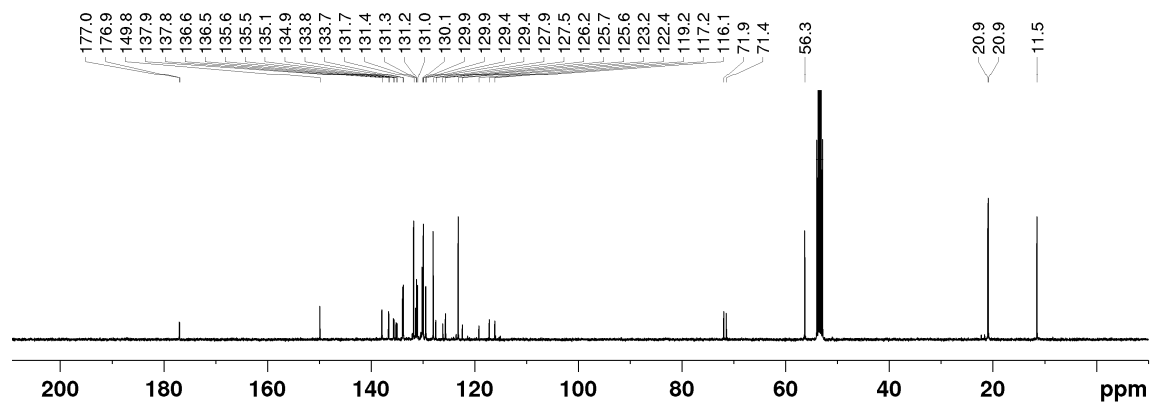

Figure S23.  $^{13}\text{C}\{^1\text{H}\}$  NMR spectrum of  $3\text{c}[\text{OTf}]_2$  (300 K,  $\text{CD}_2\text{Cl}_2$ ).

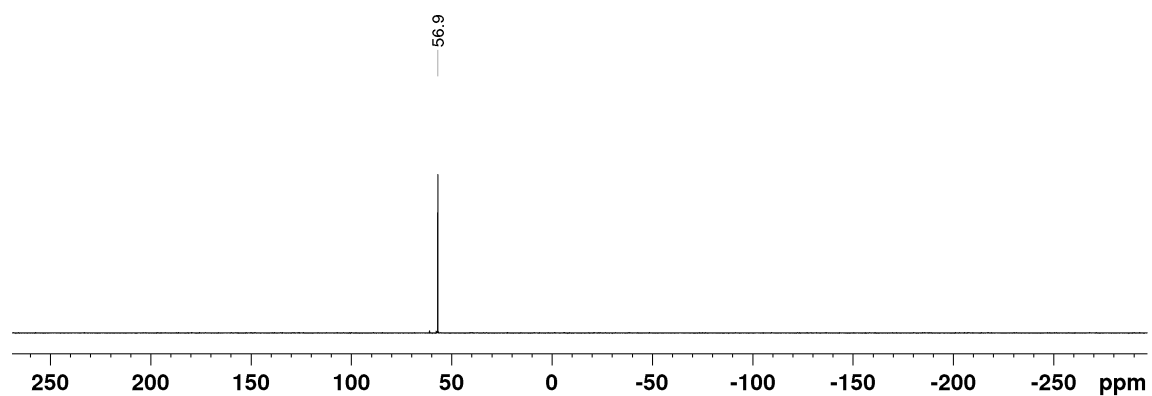

Figure S24.  $^{31}\text{P}\{^1\text{H}\}$  NMR spectrum of  $3\text{c}[\text{OTf}]_2$  (300 K,  $\text{CD}_2\text{Cl}_2$ ).

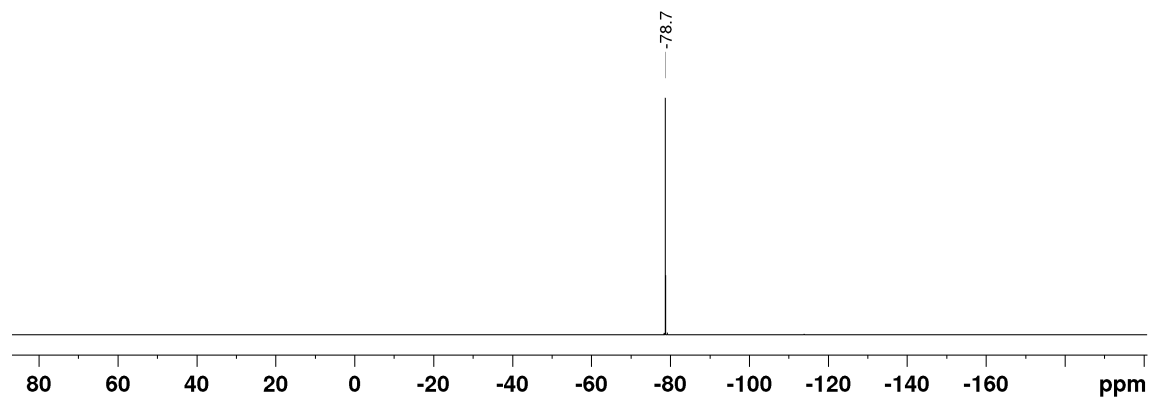

Figure S25.  $^{19}\text{F}\{^1\text{H}\}$  NMR spectrum of  $3\text{c}[\text{OTf}]_2$  (300 K,  $\text{CD}_2\text{Cl}_2$ ).

## S2.7 Preparation of $4[\text{OTf}]$

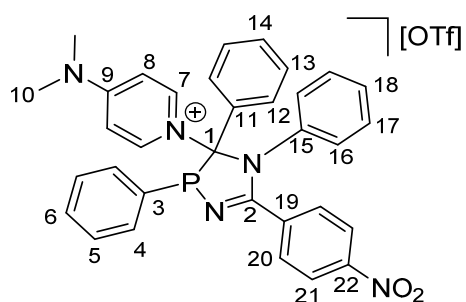

A mixture of **3c**[OTf]<sub>2</sub> (300 mg, 0.33 mmol, 1 eq.) and DMAP (40.0 mg, 0.33 mmol, 1 eq.) in PhF (8 mL) were stirred at room temperature for 16 h, resulting in a white suspension. The solid was collected by filtrations to obtain a yellow, air and moisture sensitive solid. Suitable crystals for X-ray diffraction analysis can be obtained by layering a DCM solution with Et<sub>2</sub>O at room temperature.

**Yield:** 206 mg, 89%. **m.p.** 220 °C (decomp.). **Raman** (100 mW, 50 scans, 298 K, [cm<sup>-1</sup>]): 3070 (33), 2936 (10), 1601 (100), 1585 (43), 1562 (30), 1529 (10), 1354 (67), 1224 (17), 1107 (25), 1095 (13), 1075 (27), 1032 (43), 1001 (54), 949 (22), 856 (13), 817 (14), 746 (38), 620 (10). **IR** (ATR, 298 K, [cm<sup>-1</sup>]): 1638 (m), 1558 (w), 1524 (w), 1492 (w), 1435 (vw), 1407 (vw), 1354 (w), 1320 (vw), 1307 (vw), 1264 (vs), 1222 (m), 1148 (m), 1133 (w), 1114 (vw), 1074 (m), 1054 (vw), 1029 (s), 1008 (vw), 999 (vw), 855 (w), 833 (w), 811 (w), 793 (vw), 762 (vw), 746 (w), 733 (m), 694 (m), 634 (vs), 572 (vw), 516 (w), 507 (w), 482 (w), 450 (vw), 470 (vs). **<sup>1</sup>H NMR** (500.13 MHz, CD<sub>2</sub>Cl<sub>2</sub>, 300 K, in ppm): δ = 3.23 (6H, m, H10), 6.65 (1H, m, Ar-H), 6.76 (2H, m, H16), 6.90 (1H, m, Ar-H), 7.03 (2H, m, Ar-H), 7.13 (5H, m, Ar-H), 7.23 (2H, m, Ar-H), 7.29 (2H, m, Ar-H), 7.40 (3H, m, Ar-H), 7.92 (1H, m, Ar-H), 8.01 (1H, m, Ar-H), 8.12 (2H, m, Ar-H), 8.22 (1H, m, Ar-H). **<sup>13</sup>C{<sup>1</sup>H} NMR** (125.76 MHz, CD<sub>2</sub>Cl<sub>2</sub>, 300 K, in ppm): δ = 40.7 (2C, s, C10), 40.8 (2C, s, C10), 84.7 (1C, d, <sup>1</sup>J<sub>CP</sub> = 46 Hz, C1), 96.3 (1C, d, <sup>1</sup>J<sub>CP</sub> = 51 Hz, C3), 100.5 (1C, d, <sup>1</sup>J<sub>CP</sub> = 38 Hz, C3), 107.7 (2C, s, C16), 108.8 (2C, s, C16), 115.5 (1C, d, <sup>3</sup>J<sub>CP</sub> = 21 Hz, C11), 121.5 (1C, q, <sup>1</sup>J<sub>CF</sub> = 321 Hz, OTf), 123.7 (2C, s, C8), 123.8 (2C, s, C8), 128.0 (2C, s, Ar-C), 128.2 (1C, s, Ar-C), 128.6 (2C, s, Ar-C), 128.7 (2C, s, Ar-C), 128.9 (1C, s, Ar-C), 129.0 (1C, s, Ar-C), 129.1 (2C, s, Ar-C), 129.2 (2C, s, Ar-C), 129.3 (2C, s, Ar-C), 129.8 (1C, s, Ar-C), 131.0 (2C, s, Ar-C), 131.4 (1C, s, Ar-C), 131.5 (1C, s, Ar-C), 131.7 (2C, s, Ar-C), 132.1 (1C, s, Ar-C), 132.4 (1C, s, Ar-C), 132.6 (1C, s, Ar-C), 134.3 (1C, s, Ar-C), 138.8 (2C, d, <sup>3</sup>J<sub>CP</sub> = 17 Hz, C7), 141.5 (2C, d, <sup>3</sup>J<sub>CP</sub> = 15 Hz, C7), 149.2 (2C, s, C21), 149.5 (2C, s, C21), 156.4 (1C, s, C22), 157.0 (1C, s, C9), 157.9 (1C, s, C9), 164.2 (1C, s, C22), 167.8 (1C, d, <sup>2</sup>J<sub>CP</sub> = 7 Hz, C2), 174.1 (1C, d, <sup>2</sup>J<sub>CP</sub> = 10 Hz, C2). Because of overlapping, it is impossible to distinguish signals between two isomers. **<sup>19</sup>F{<sup>1</sup>H} NMR** (470.59 MHz, CD<sub>2</sub>Cl<sub>2</sub>, 300 K, in ppm): δ = -78.7 (s, OTf). **<sup>31</sup>P{<sup>1</sup>H} NMR** (202.46 MHz, CD<sub>2</sub>Cl<sub>2</sub>, 300 K, in ppm): δ = 109.8 (s) (43%), 100.5 (s) (57%). **Elemental analysis:** calculated for C<sub>34</sub>H<sub>29</sub>F<sub>3</sub>N<sub>5</sub>O<sub>5</sub>PS 0.45 CH<sub>2</sub>Cl<sub>2</sub>: C, 55.48; H, 4.04; N, 9.39; S, 4.30; found: C, 55.61; H, 3.719; N, 9.36; S, 3.996.

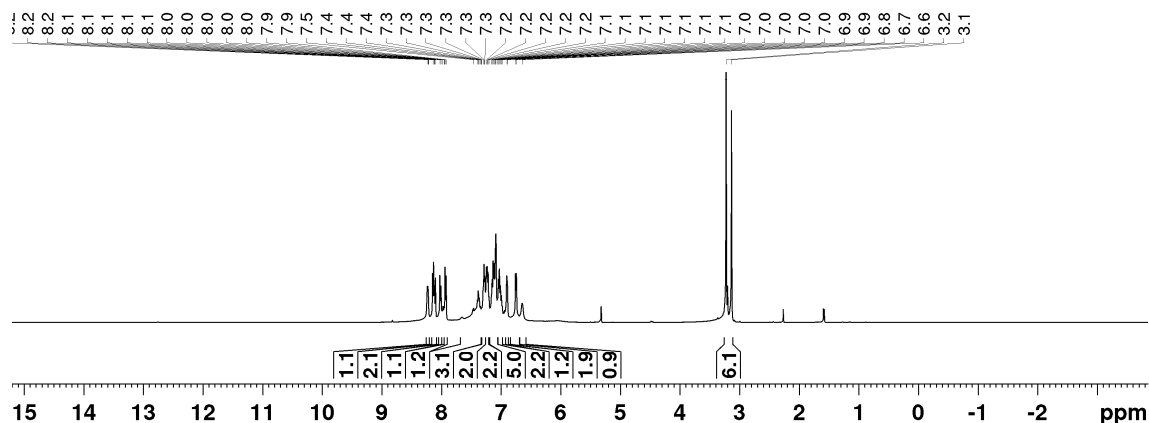

**Figure S26.** <sup>1</sup>H NMR spectrum of **4**[OTf] (300 K, CD<sub>2</sub>Cl<sub>2</sub>).

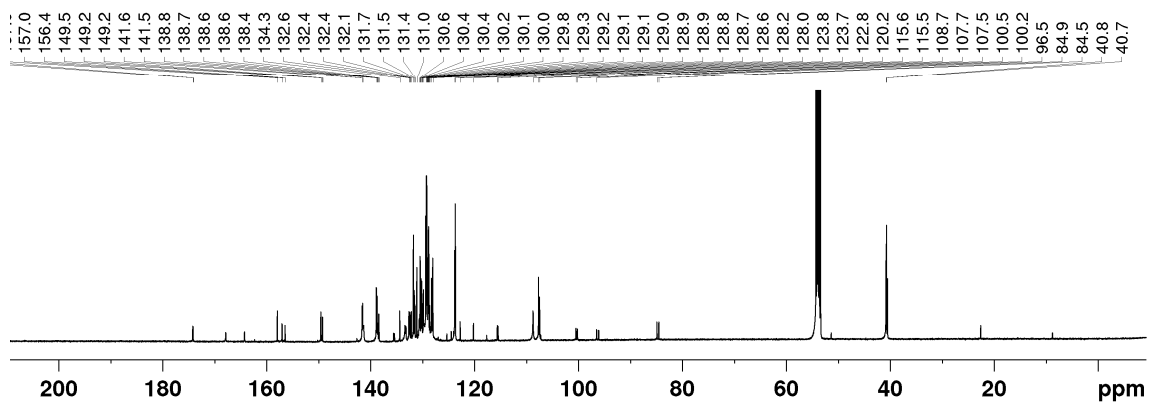

Figure S27.  $^{13}\text{C}\{^1\text{H}\}$  NMR spectrum of 4[OTf] (300 K,  $\text{CD}_2\text{Cl}_2$ ).

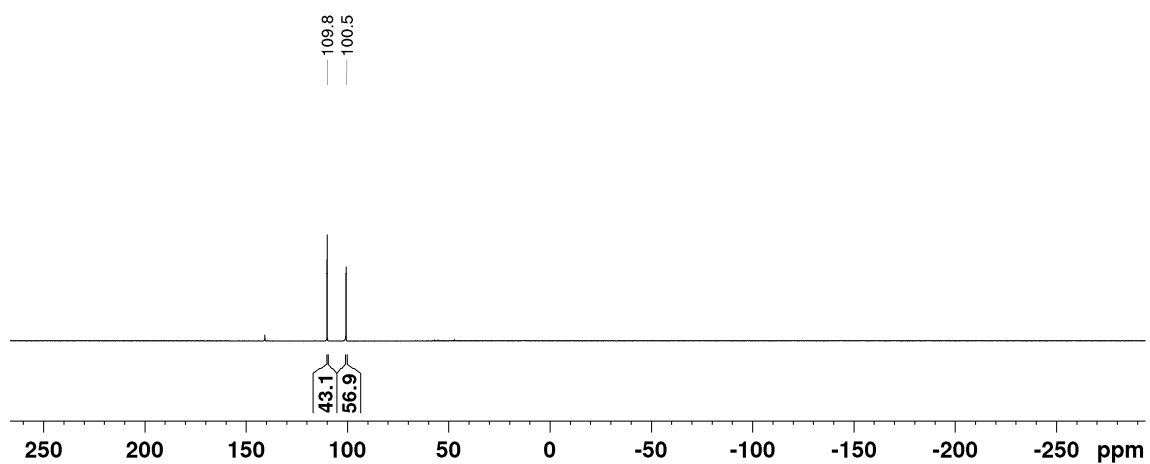

Figure S28.  $^{31}\text{P}\{^1\text{H}\}$  NMR spectrum of 4[OTf] (300 K,  $\text{CD}_2\text{Cl}_2$ ).

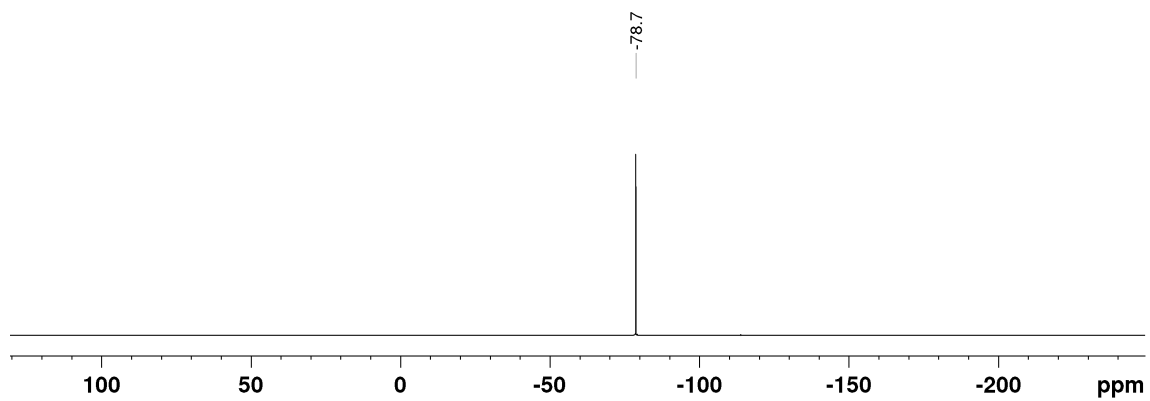

Figure S29.  $^{19}\text{F}\{^1\text{H}\}$  NMR spectrum of 4[OTf] (300 K,  $\text{CD}_2\text{Cl}_2$ ).

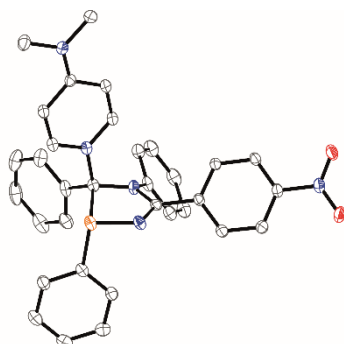

**Figure S30.** Molecular structure of **4<sup>+</sup>** in **4[OTf]**; hydrogen atoms and the anion are omitted for clarity and thermal ellipsoids are displayed at 50% probability (100 K).

## S2.8 Preparation of **5a[OTf]**

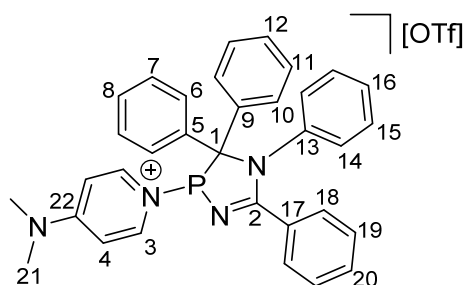

To a suspension of **3a[OTf]<sub>2</sub>** (1.0 g, 1.15 mmol, 1 eq.) in PhF (10 mL) DMAP (140.3 mg, 1.15 mmol, 1 eq.) was added and the mixture was stirred at room temperature for 7 days, affording a yellow suspension. The solid was collected by filtration and evaporated *in vacuo* to obtain a white, air and moisture sensitive solid. Suitable crystals for X-ray diffraction analysis were obtained by layering a DCM solution with Et<sub>2</sub>O at room temperature. For small-scale reaction (100 mg), the reaction can be completed within 16 h.

**Yield:** 721 mg, 95%. **m.p.** 210 °C. **Raman** (100 mW, 50 scans, 298 K, [cm<sup>-1</sup>]): 3067 (20), 1600 (51), 1580 (22), 1516 (16), 1444 (7), 1351 (11), 1268 (8), 1169 (12), 1034 (25), 999 (57), 949 (9), 826 (10), 773 (15), 677 (12), 626 (8), 616 (7), 494 (9), 313 (7), 267 (15), 250 (10), 229 (10), 92 (100). **IR** (ATR, 298 K, [cm<sup>-1</sup>]): 2361 (m), 2341 (w), 1630 (s), 1572 (w), 1510 (w), 1481 (m), 1442 (w), 1402 (w), 1348 (m), 1262 (vs), 1219 (s), 1138 (m), 1043 (s), 1029 (vs), 1011 (m), 970 (w), 956 (w), 922 (w), 895 (w), 831 (s), 822 (s), 803 (m), 766 (w), 752 (s), 723 (m), 697 (s), 661 (w), 654 (w), 634 (vs), 590 (m), 573 (w), 514 (m), 492 (m), 476 (m). **<sup>1</sup>H NMR** (500.13 MHz, CD<sub>2</sub>Cl<sub>2</sub>, 300 K, in ppm): δ = 7.81-7.79 (m, H3, 2H), 7.65 (m, H4, 2H), 7.84-7.53 (m, Ar-H, 2H), 7.50-7.47 (m, Ar-H, 1H), 7.40-7.37 (m, Ar-H, 5H), 7.20-7.17 (m, Ar-H, 3H), 7.14-7.10 (m, Ar-H, 2H), 7.01-7.0 (m, Ar-H, 1H), 6.98-6.95 (m, Ar-H, 2H), 6.75-6.71 (m, Ar-H, 4H), 3.24 (s, H21, 6H). **<sup>13</sup>C{<sup>1</sup>H} NMR** (125.76 MHz, CD<sub>2</sub>Cl<sub>2</sub>, 300 K, in ppm): δ = 40.4 (2C, s, C21), 84.6 (1C, s, <sup>1</sup>J<sub>CP</sub> = 46.0 Hz, C1), 108.1 (2C, s, C14), 115.2 (1C, d, <sup>2</sup>J<sub>CP</sub> = 20.9 Hz, C9), 122.4 (1C, q, <sup>1</sup>J<sub>CF</sub> = 321.4 Hz, OTf), 124.1 (1C, s, C16), 127.2 (1C, s, C12), 127.5 (1C, s, C20), 128.0 (1C, s, C22), 128.3 (1C, s, C13), 128.7 (2C, s, C19), 129.2 (1C, s, C8), 129.9 (1C, d, <sup>2</sup>J<sub>CP</sub> = 14.6 Hz, C5), 130.1 (1C, d, <sup>3</sup>J<sub>CP</sub> = 7.8 Hz, C17), 130.2 (2C, s, C7), 131.8 (2C, s, C11), 132.0 (2C, d, <sup>3</sup>J<sub>CP</sub> = 6.1 Hz, C4), 134.4 (2C, s, C6), 138.0 (2C, d, <sup>2</sup>J<sub>CP</sub> = 29.8 Hz, C3), 139.4 (2C, s, C15), 140.7 (2C, s, C18), 157.4 (2C, s, C10), 175.8 (1C, d, <sup>2</sup>J<sub>CP</sub> = 10.1 Hz, C2). **<sup>19</sup>F{<sup>1</sup>H} NMR** (470.59 MHz, CD<sub>2</sub>Cl<sub>2</sub>, 300 K, in ppm): δ = -78.8 (s, OTf). **<sup>31</sup>P{<sup>1</sup>H} NMR** (202.46 MHz, CD<sub>2</sub>Cl<sub>2</sub>, 300 K, in ppm): δ = 141.5 (s). **Elemental analysis:** calculated for C<sub>34</sub>H<sub>30</sub>F<sub>3</sub>N<sub>4</sub>O<sub>3</sub>PS: C, 61.63; H, 4.56; N, 8.45; S, 4.84; found: C, 61.25; H, 4.470; N, 7.97; S, 4.533.

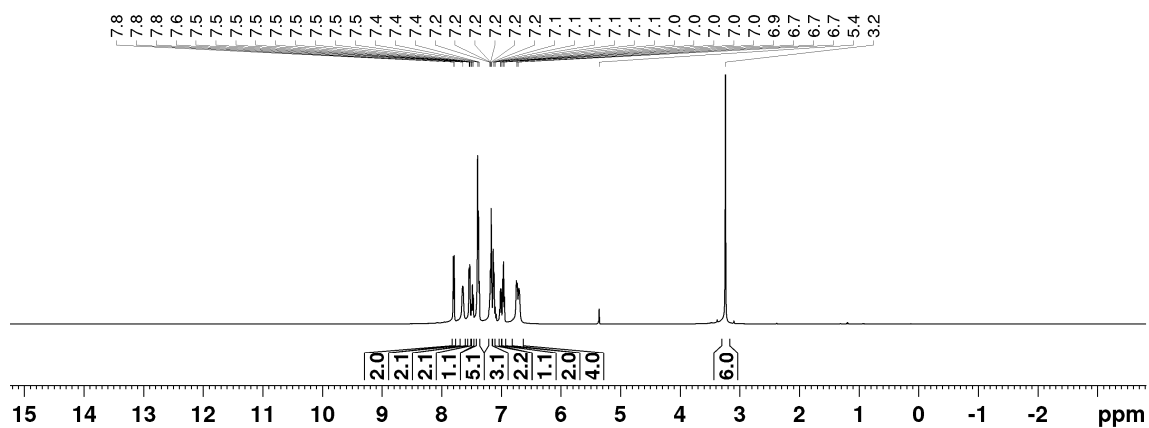

Figure S31.  $^1\text{H}$  NMR spectrum of **5a**[OTf] (300 K,  $\text{CD}_2\text{Cl}_2$ ).

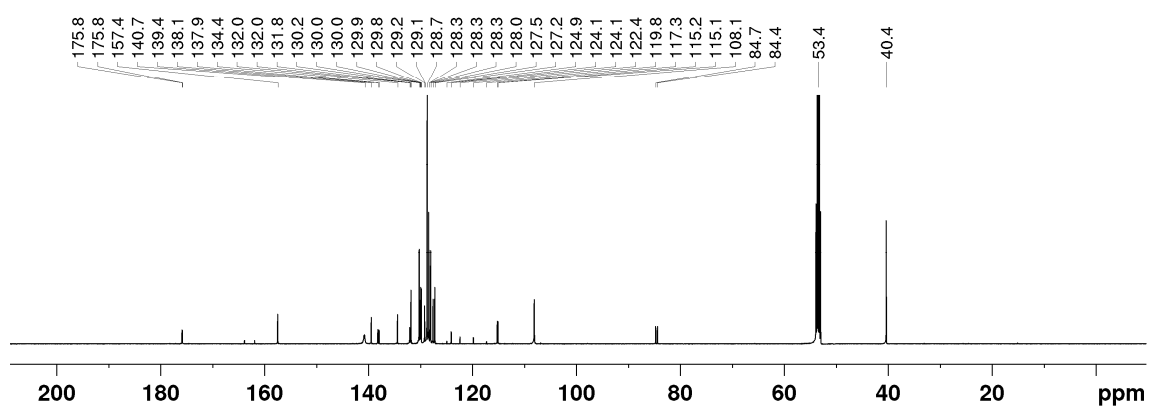

Figure S32.  $^{13}\text{C}\{^1\text{H}\}$  NMR spectrum of **5a**[OTf] (300 K,  $\text{CD}_2\text{Cl}_2$ ).

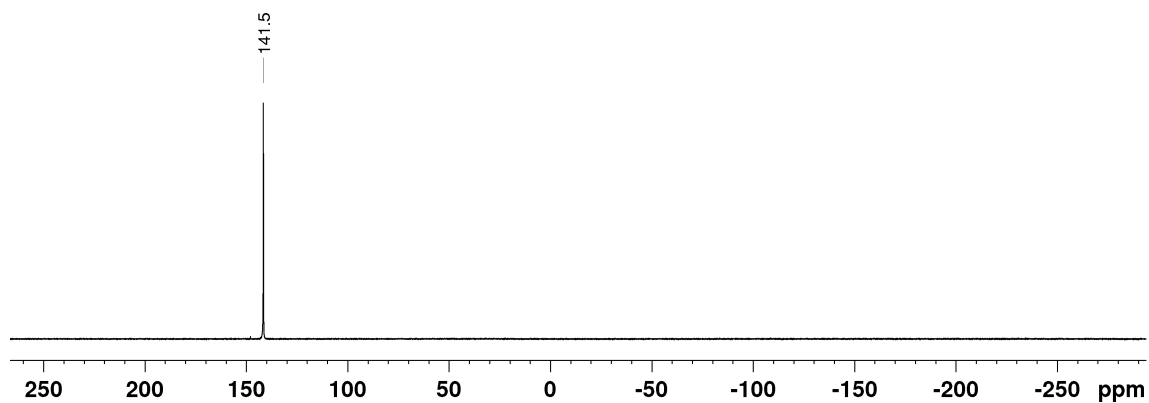

Figure S33.  $^{31}\text{P}\{^1\text{H}\}$  NMR spectrum of **5a**[OTf] (300 K,  $\text{CD}_2\text{Cl}_2$ ).

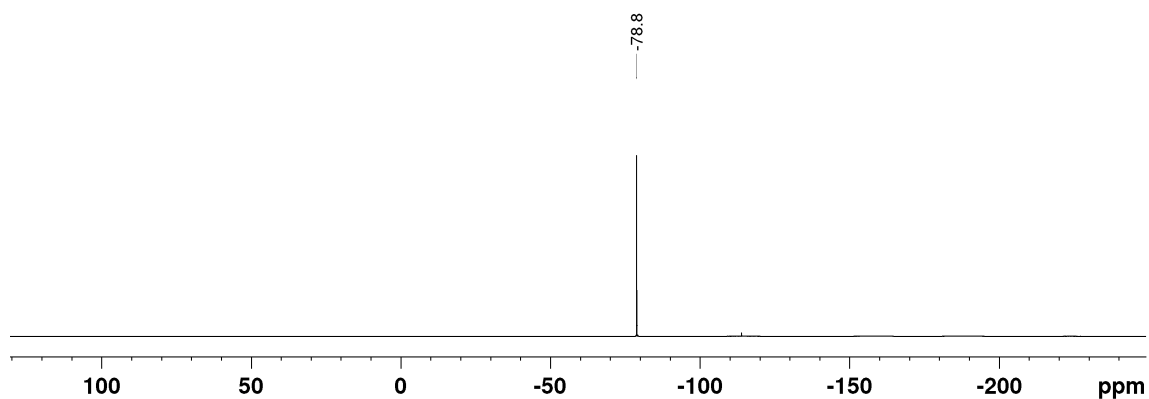

**Figure S34.**  $^{19}\text{F}\{^1\text{H}\}$  NMR spectrum of **5a**[OTf] (300 K,  $\text{CD}_2\text{Cl}_2$ ).

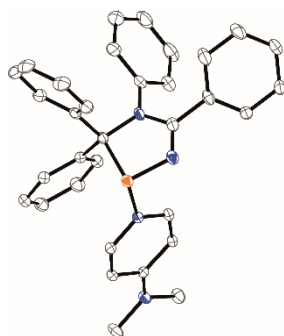

**Figure S35.** Molecular structure of **5a**<sup>+</sup> in **5a**[OTf]; hydrogen atoms and the anion are omitted for clarity and thermal ellipsoids are displayed at 50% probability (100 K).

## S2.9 Preparation of **5b**[OTf]

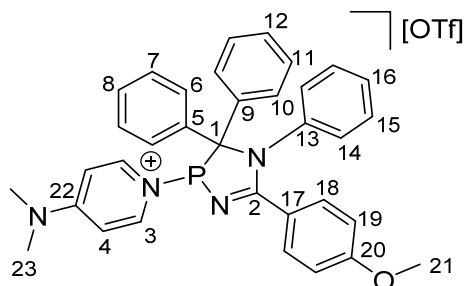

A mixture of **3b**[OTf]<sub>2</sub> (150 mg, 0.17 mmol, 1 eq.) and DMAP (21.0 mg, 0.17 mmol, 1 eq.) in PhF (4 mL) was stirred at room temperature for 2 days, affording a white suspension. The filtrates were collected and concentrated by evaporation. The crude solid was dissolved in DCM and then recrystallized by slowly diffused of Et<sub>2</sub>O into the DCM solution at room temperature to give an air and moisture sensitive white solid as **5b**[OTf].

**Yield:** 30 mg, 52%. **m.p.** 203 °C. **Raman** (100 mW, 50 scans, 298 K,  $[\text{cm}^{-1}]$ ): 3061 (93), 2940 (38), 1613 (91), 1596 (73), 1579 (81), 1534 (34), 1182 (31), 1167 (31), 1041 (71), 1034 (66), 1001 (100), 945 (26), 834 (33), 769 (35), 676 (24). **IR** (ATR, 298 K,  $[\text{cm}^{-1}]$ ): 1631 (m), 1611 (w), 1576 (w), 1488 (m), 1441 (w), 1401 (vw), 1348 (w), 1263 (vs), 1250 (s), 1220 (s), 1180 (w), 1145 (s), 1116 (vw), 1031 (vs), 1011 (m), 958 (w), 847 (w), 823 (m), 805 (m), 773 (m), 764 (m), 753 (m), 726 (m), 699 (s), 636 (vs), 587 (m), 572 (w), 528 (vw), 515 (m), 496 (w), 474 (w), 428 (vw). **<sup>1</sup>H NMR** (500.13 MHz,  $\text{CD}_2\text{Cl}_2$ , 300 K, in ppm):  $\delta$  = 3.20 (6H, s, H23), 3.81 (3H, s, H21), 6.65 (2H, m, H4), 6.71 (2H, m, H14), 6.84 (2H, m, H19), 6.97 (3H, m, Ar-H), 7.03 (2H, m, H10), 7.11 (3H, m, Ar-H), 7.35 (3H, m, Ar-H), 7.49 (2H, m, H6), 7.59 (2H, m, H3), 7.74 (2H,

m, H18).  **$^{13}\text{C}\{^1\text{H}\}$  NMR** (125.76 MHz,  $\text{CD}_2\text{Cl}_2$ , 300 K, in ppm) :  $\delta$  = 40.8 (1C, s, C23), 55.9 (1C, s, C21), 85.2 (1C, d,  $^1J_{\text{CP}} = 40$  Hz, C1), 108.5 (2C, s, C4), 114.1 (2C, s, C19), 121.5 (1C, q,  $^1J_{\text{CF}} = 321$  Hz, OTf), 124.1 (1C, d,  $^3J_{\text{CP}} = 6$  Hz, C17), 127.4 (2C, s, C14), 127.9 (1C, s, C12), 128.2 (2C, s, C10), 128.7 (2C, d,  $^3J_{\text{CP}} = 2$  Hz, C6), 129.0 (2C, s, C11), 129.1 (2C, s, C7), 129.5 (1C, s, C8), 130.2 (2C, s, C15), 130.4 (2C, s, C16), 133.0 (2C, s, C18), 134.9 (1C, s, C9), 138.2 (1C, d,  $^2J_{\text{CP}} = 30$  Hz, C5), 140.3 (1C, s, C13), 141.1 (2C, br, C3), 157.8 (1C, s, C22), 163.0 (1C, s, C20), 175.7 (1C, d,  $^2J_{\text{CP}} = 10$  Hz, C2).  **$^{19}\text{F}\{^1\text{H}\}$  NMR** (470.59 MHz,  $\text{CD}_2\text{Cl}_2$ , 300 K, in ppm):  $\delta$  = -78.8 (s, OTf).  **$^{31}\text{P}\{^1\text{H}\}$  NMR** (202.46 MHz,  $\text{CD}_2\text{Cl}_2$ , 300 K, in ppm):  $\delta$  = 140.1 (s). **Elemental analysis**: calculated for  $\text{C}_{35}\text{H}_{32}\text{F}_3\text{N}_4\text{O}_4\text{PS}$  0.35  $\text{CH}_2\text{Cl}_2$ : C, 58.77; H, 4.56; N, 7.76; S, 4.44; found: C, 58.52; H, 4.825; N, 8.17; S, 4.474.

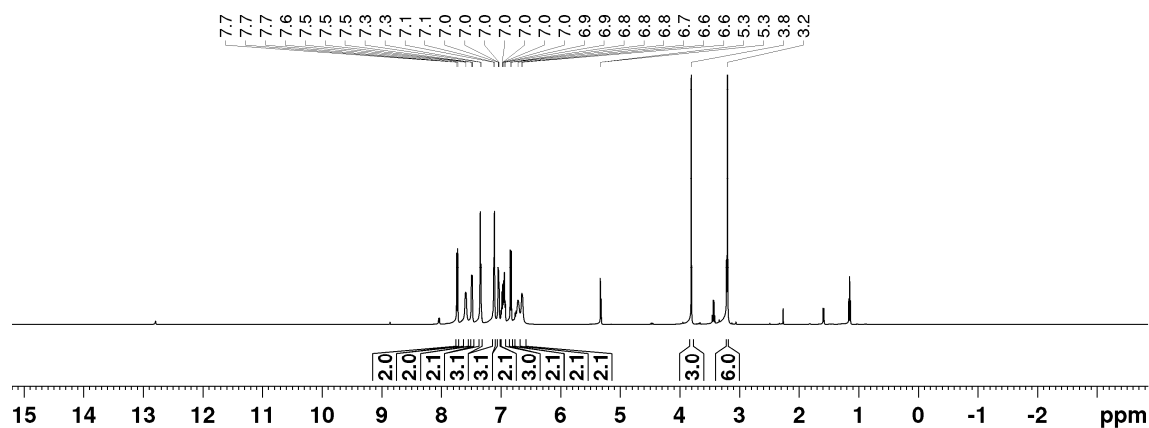

**Figure S36.**  $^1\text{H}$  NMR spectrum of **5b**[OTf] (300 K,  $\text{CD}_2\text{Cl}_2$ ).

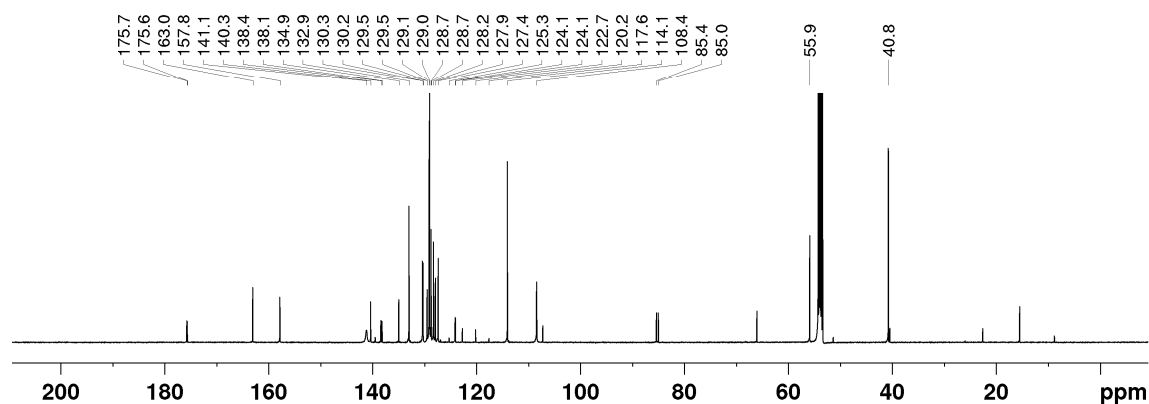

**Figure S37.**  $^{13}\text{C}\{^1\text{H}\}$  NMR spectrum of **5b**[OTf] (300 K,  $\text{CD}_2\text{Cl}_2$ ).

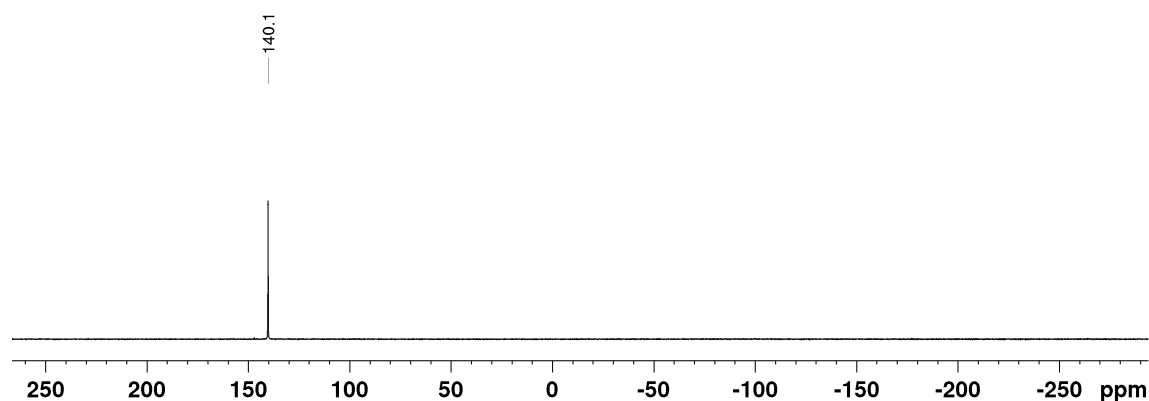

**Figure S38.**  $^{31}\text{P}\{^1\text{H}\}$  NMR spectrum of **5b**[OTf] (300 K,  $\text{CD}_2\text{Cl}_2$ ).

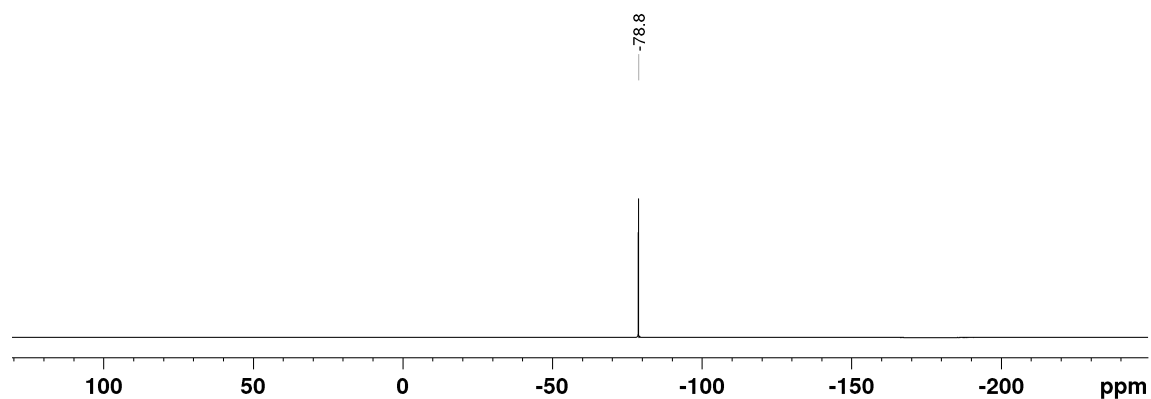

**Figure S39.**  $^{19}\text{F}\{^1\text{H}\}$  NMR spectrum of **5b**[OTf] (300 K,  $\text{CD}_2\text{Cl}_2$ ).

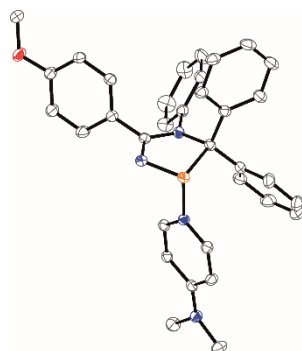

**Figure S40.** Molecular structure of **5b**<sup>+</sup> in **5b**[OTf] · 0.5  $\text{CH}_2\text{Cl}_2$ ; hydrogen atoms, the anion, and solvent molecules are omitted for clarity and thermal ellipsoids are displayed at 50% probability (100 K).

## S2.10 Preparation of **6**[OTf]<sub>2</sub>

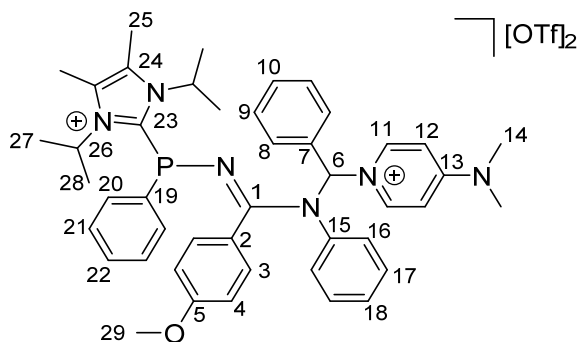

A mixture of **3b**[OTf]<sub>2</sub> (150 mg, 0.17mmol, 1 eq.) and DMAP (21.0 mg, 0.17mmol, 1 eq.) in PhF (4 mL) was stirred at room temperature for 2 days, resulting in a white suspension. The suspension was filtered and washed with PhF (3 x 1 mL) to obtain a white, air and moisture sensitive powder. Suitable crystals for X-ray diffraction analysis can be obtained by layering a DCM solution with Et<sub>2</sub>O at room temperature.

**Yield:** 32 mg, 38%. **m.p.** 152 °C (decomp.). **Raman** (100 mW, 50 scans, 298 K,  $[\text{cm}^{-1}]$ ): 3063 (100), 2945 (90), 1606 (90), 1586 (61), 1577 (64), 1562 (47), 1285 (54), 1033 (94), 1000 (87), 755 (49), 349 (74), 313 (73), 267 (89). **IR** (ATR, 298 K,  $[\text{cm}^{-1}]$ ): 1644 (w), 1607 (vw), 1576 (w), 1560 (w), 1508 (w), 1496 (w), 1457 (vw), 1440 (vw), 1410 (vw), 1344 (vw), 1326 (vw), 1314 (vw), 1262 (vs), 1251 (s), 1221 (m), 1149 (m), 1115 (m), 1066 (vw), 1028 (s), 842 (w), 827 (vw), 806 (vw), 792 (vw), 778 (vw), 750 (w), 716 (vw), 703 (w), 689 (vw), 665 (vw), 649 (vw), 636 (vs), 573 (w), 544 (vw), 517 (m), 459 (vw), 448 (vw). **<sup>1</sup>H NMR** (500.13 MHz,  $\text{CD}_3\text{CN}$ , 300

K, in ppm):  $\delta = 1.00$  (6H, d,  $^3J_{\text{HH}} = 6.8$  Hz, H28), 1.45 (6H, d,  $^3J_{\text{HH}} = 7.0$  Hz, H27), 2.30 (6H, s, H25), 3.24 (6H, s, H14), 3.68 (3H, s, H29), 5.08 (2H, sept,  $^3J_{\text{HH}} = 6.9$  Hz, H26), 6.75 (2H, m, H3), 6.97 (4H, m, Ar-H), 7.00 (3H, m, Ar-H), 7.14 (3H, m, Ar-H), 7.21 (2H, m, Ar-H), 7.32 (3H, m, Ar-H), 7.38 (4H, m, Ar-H), 8.22 (1H, s, H6), 8.24 (2H, d,  $^3J_{\text{HH}} = 7.5$  Hz, H11).  **$^{13}\text{C}\{^1\text{H}\}$  NMR** (125.76 MHz,  $\text{CD}_3\text{CN}$ , 300 K, [ppm]):  $\delta = 10.0$  (2C, s, C25), 19.8 (2C, s, C28), 20.9 (2C, s, C27), 40.0 (2C, s, C14), 52.4 (2C, d,  $^3J_{\text{CP}} = 14$  Hz, C26), 55.1 (1C, s, C29), 79.7 (1C, s, C6), 107.9 (2C, s, C12), 113.9 (2C, s, C4), 115.1 (2C, d,  $^2J_{\text{CP}} = 22$  Hz, C20), 122.4 (2C, q,  $^1J_{\text{CF}} = 321$  Hz, OTf), 127.2 (1C, d,  $^3J_{\text{CP}} = 9$  Hz, C2), 128.3 (1C, s, Ar-C), 128.8 (2C, s, Ar-C), 129.0 (1C, s, Ar-C), 129.1 (2C, s, Ar-C), 129.2 (2C, s, Ar-C), 129.4 (2C, s, Ar-C), 129.9 (1C, s, Ar-C), 130.3 (2C, d,  $^3J_{\text{CP}} = 8$  Hz, C21), 130.8 (1C, s, C24), 131.4 (2C, s, Ar-C), 133.4 (1C, s, C15), 138.6 (1C, s, C7), 139.9 (2C, s, C11), 144.3 (1C, d,  $^1J_{\text{CP}} = 70$  Hz, C23), 157.1 (1C, s, C13), 160.3 (1C, s, C5), 162.8 (1C, d,  $^1J_{\text{CP}} = 248$  Hz, C19), 171.1 (1C, d,  $^2J_{\text{CP}} = 32$  Hz, C1).  **$^{19}\text{F}\{^1\text{H}\}$  NMR** (470.59 MHz,  $\text{CD}_3\text{CN}$ , 300 K, in ppm):  $\delta = -79.3$  (s, OTf).  **$^{31}\text{P}\{^1\text{H}\}$  NMR** (202.46 MHz,  $\text{CD}_3\text{CN}$ , 300 K, in ppm):  $\delta = 12.9$  (s). **Elemental analysis:** calculated for  $\text{C}_{47}\text{H}_{53}\text{F}_6\text{N}_6\text{O}_7\text{PS}_2$  0.65  $\text{C}_4\text{H}_{10}\text{O}$ : C, 55.61; H, 5.60; N, 7.85; S, 5.99; found: C, 55.29; H, 5.424; N, 7.53; S, 5.695.

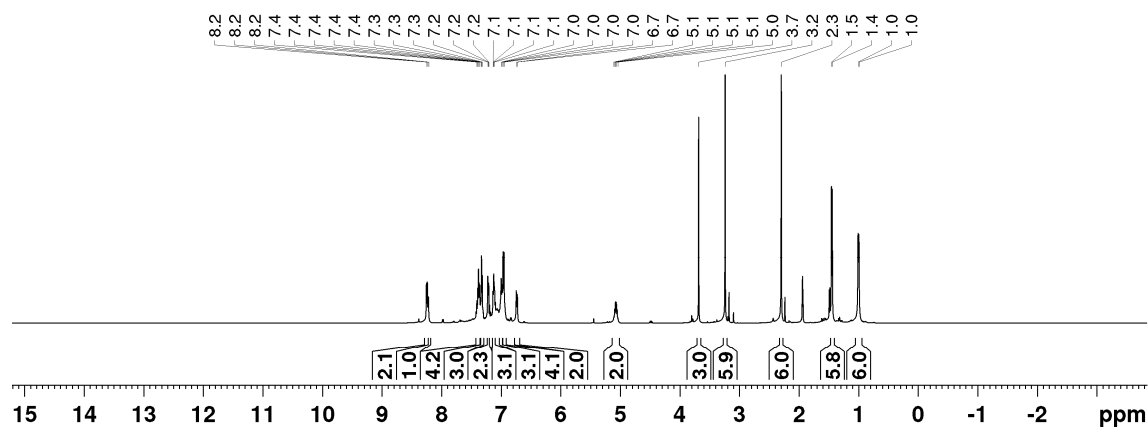

**Figure S41.**  $^1\text{H}$  NMR spectrum of ring-opening product **6**[OTf]<sub>2</sub> (300 K,  $\text{CD}_3\text{CN}$ ).

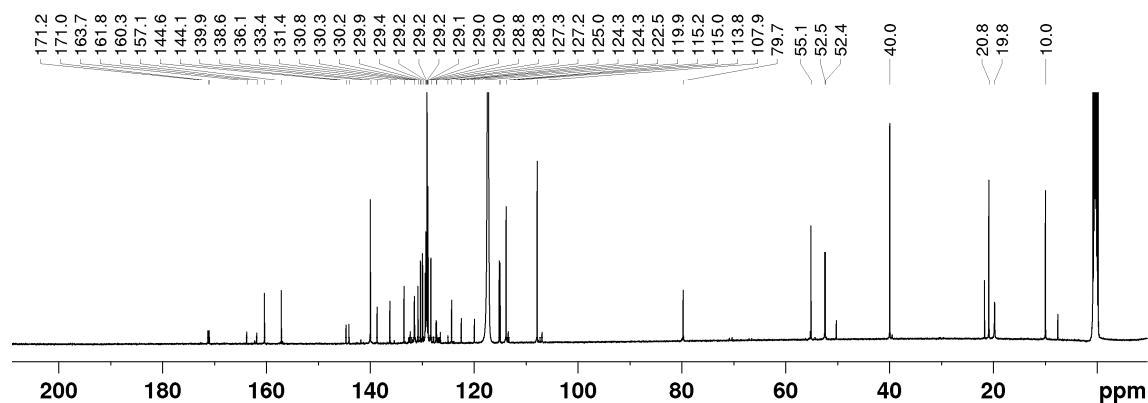

**Figure S42.**  $^{13}\text{C}\{^1\text{H}\}$  NMR spectrum of ring-opening product **6**[OTf]<sub>2</sub> (300 K,  $\text{CD}_3\text{CN}$ ).

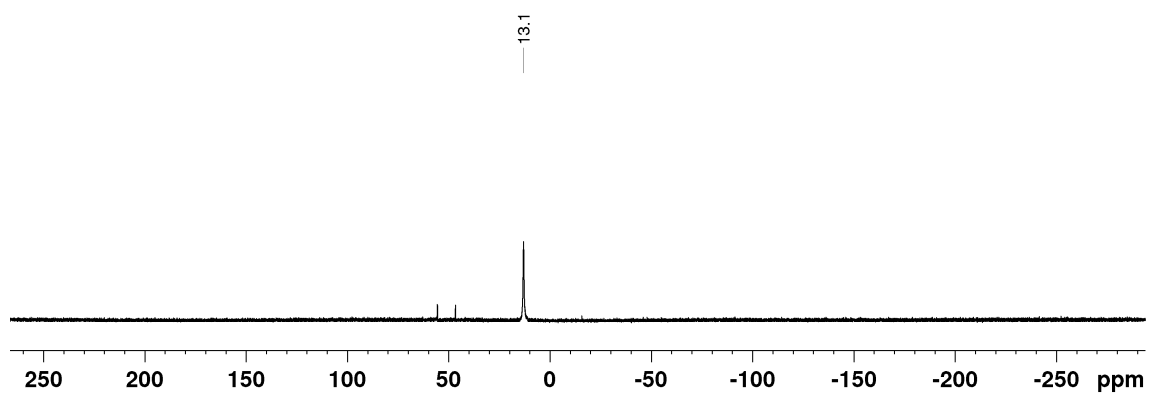

**Figure S43.**  $^{31}\text{P}\{^1\text{H}\}$  NMR spectrum of ring-opening product  $6[\text{OTf}]_2$  (300 K,  $\text{CD}_3\text{CN}$ ).

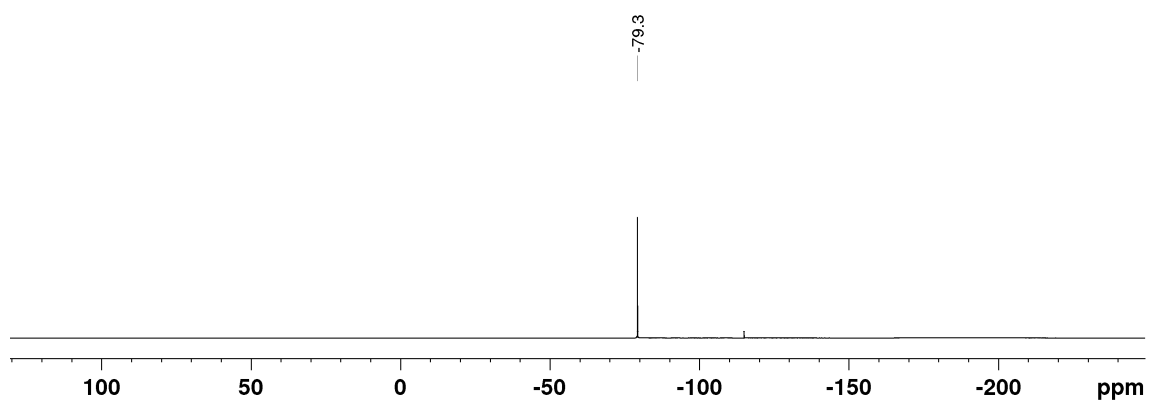

**Figure S44.**  $^{19}\text{F}\{^1\text{H}\}$  NMR spectrum of ring-opening product  $6[\text{OTf}]_2$  (300 K,  $\text{CD}_3\text{CN}$ ).

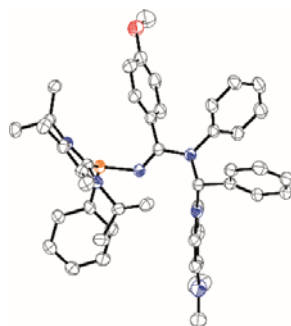

**Figure S45.** Molecular structure of ring-opening product  $6^{2+}$  in  $6[\text{OTf}]_2 \cdot 0.666 \text{CH}_2\text{Cl}_2$ ; hydrogen atoms, the anions, and solvent molecules are omitted for clarity and thermal ellipsoids are displayed at 50% probability (100 K).

## S2.11 Preparation of $5\text{c}[\text{OTf}]$

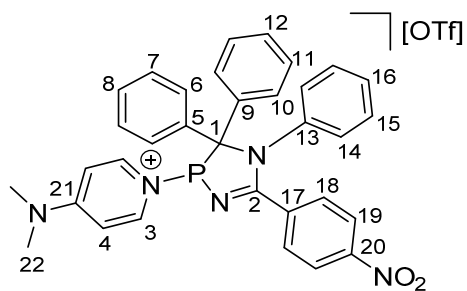

The isolated **4**[OTf] (72 mg) was dissolved in DCM (2 mL) and stirred for 16 h. Subsequent removal of the solvent *in vacuo* afforded a pale yellow, air and moisture sensitive solid. Suitable crystals for X-ray diffraction analysis were obtained by layering a DCM solution with Et<sub>2</sub>O at room temperature. Prolonging the reaction time (>1 week) for **3c**[OTf]<sub>2</sub> with DMAP can afford **5c**[OTf].

**Yield:** 72 mg, 99%. **m.p.** 215 °C (decomp.). **Raman** (100 mW, 50 scans, 298 K, [cm<sup>-1</sup>]): No Raman spectrum could be obtained due to fluorescence of the compound. **IR** (ATR, 298 K, [cm<sup>-1</sup>]): 1631 (m), 1567 (vw), 1524 (m), 1510 (w), 1487 (w), 1444 (vw), 1402 (vw), 1343 (m), 1315 (w), 1273 (m), 1257 (vs), 1221 (m), 1147 (m), 1041 (s), 1029 (vs), 1005 (vw), 868 (w), 859 (w), 826 (m), 803 (vw), 766 (w), 755 (m), 733 (m), 713 (w), 695 (m), 674 (vw), 636 (vs), 627 (m), 588 (w), 571 (vw), 516 (m), 503 (w), 493 (vw), 470 (w). **<sup>1</sup>H NMR** (500.13 MHz, CD<sub>3</sub>CN, 300 K, in ppm): δ = 3.15 (6H, s, H22), 6.61 (2H, m, Ar-H), 6.76 (2H, m, Ar-H), 6.95 (2H, m, Ar-H), 7.05 (6H, m, Ar-H), 7.39 (3H, m, Ar-H), 7.58 (2H, m, Ar-H), 7.66 (2H, m, H4), 7.99 (2H, m, H3), 8.16 (2H, m, H19). **<sup>13</sup>C{<sup>1</sup>H} NMR** (125.76 MHz, CD<sub>3</sub>CN, 300 K, in ppm): δ = 39.6 (1C, s, C22), 39.9 (1C, s, C22), 84.6 (1C, d, <sup>1</sup>J<sub>CP</sub> = 47 Hz, C1), 122.5 (1C, 1, <sup>1</sup>J<sub>CF</sub> = 321 Hz, OTf), 123.3 (2C, s, C19), 128.6 (2C, s, Ar-C), 128.8 (2C, s, Ar-C), 129.2 (1C, d, <sup>4</sup>J<sub>CP</sub> = 2 Hz, Ar-C), 130.4 (2C, d, <sup>3</sup>J<sub>CP</sub> = 15 Hz, Ar-C), 131.6 (2C, s, C3), 131.6 (2C, s, Ar-C), 134.0 (2C, s, Ar-C), 137.8 (1C, d, <sup>3</sup>J<sub>CP</sub> = 31 Hz, C13), 138.2 (1C, d, <sup>3</sup>J<sub>CP</sub> = 6 Hz, C17), 138.5 (1C, s, C5), 138.8 (1C, s, C9), 141.0 (2C, br, C4), 149.4 (1C, s, C20), 157.5 (1C, s, C21), 172.5 (1C, d, <sup>2</sup>J<sub>CP</sub> = 10 Hz, C2). **<sup>19</sup>F{<sup>1</sup>H} NMR** (470.59 MHz, CD<sub>3</sub>CN, 300 K, in ppm): δ = -79.3 (s, OTf). **<sup>31</sup>P{<sup>1</sup>H} NMR** (202.46 MHz, CD<sub>3</sub>CN, 300 K, in ppm): δ = 139.8 (s). **Elemental analysis:** calculated for C<sub>34</sub>H<sub>29</sub>F<sub>3</sub>N<sub>5</sub>O<sub>5</sub>PS 0.25 CH<sub>2</sub>Cl<sub>2</sub>: C, 56.44; H, 4.08; N, 9.61; S, 4.40; found: C, 56.83; H, 3.473; N, 9.55; S, 4.181.

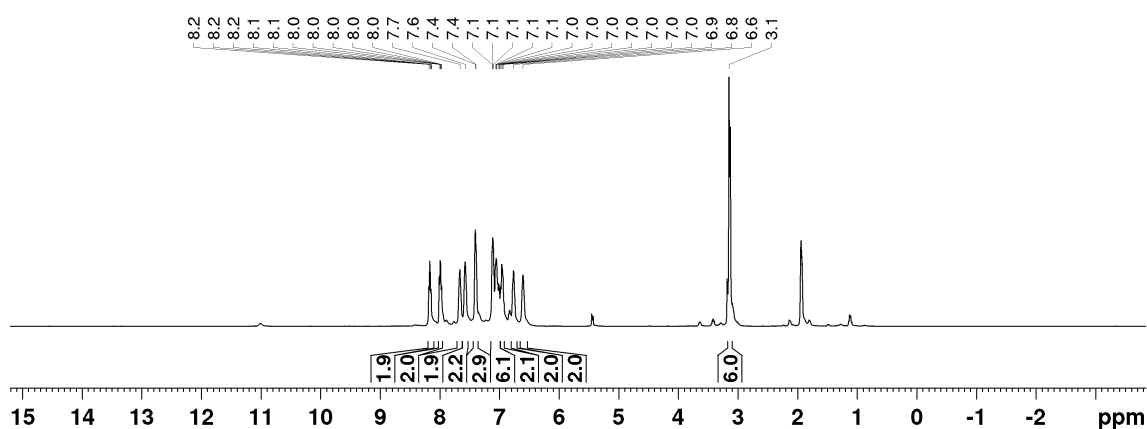

**Figure S46.** <sup>1</sup>H NMR spectrum of **5c**[OTf] (300 K, CD<sub>3</sub>CN).

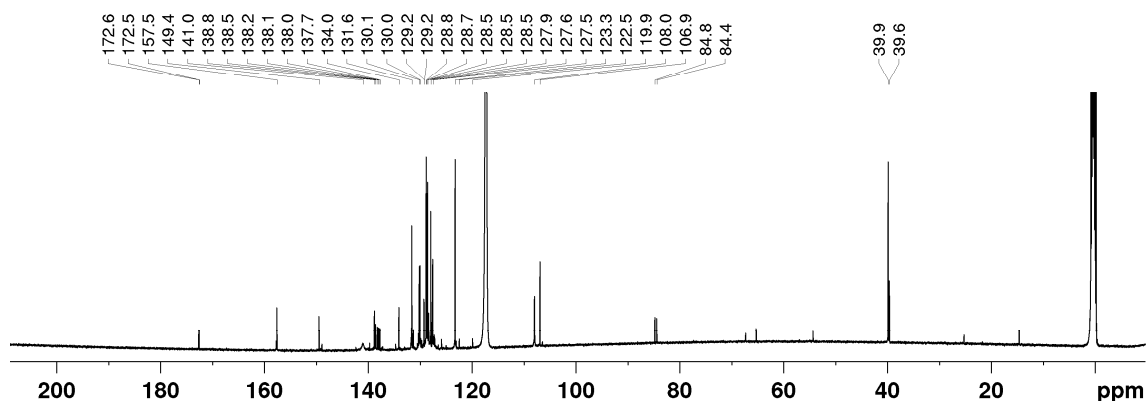

**Figure S47.** <sup>13</sup>C{<sup>1</sup>H} NMR spectrum of **5c**[OTf] (300 K, CD<sub>3</sub>CN).

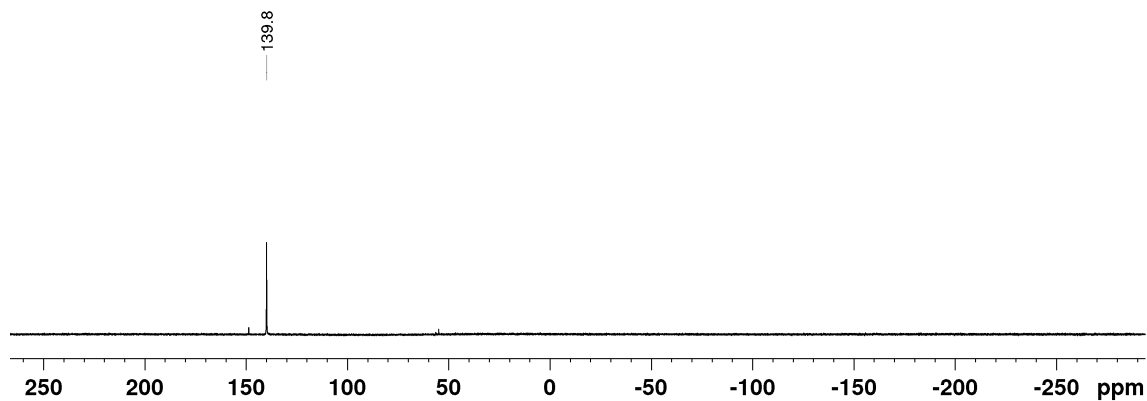

**Figure S48.**  $^{31}\text{P}\{^1\text{H}\}$  NMR spectrum of **5c**[OTf] (300 K,  $\text{CD}_3\text{CN}$ ).

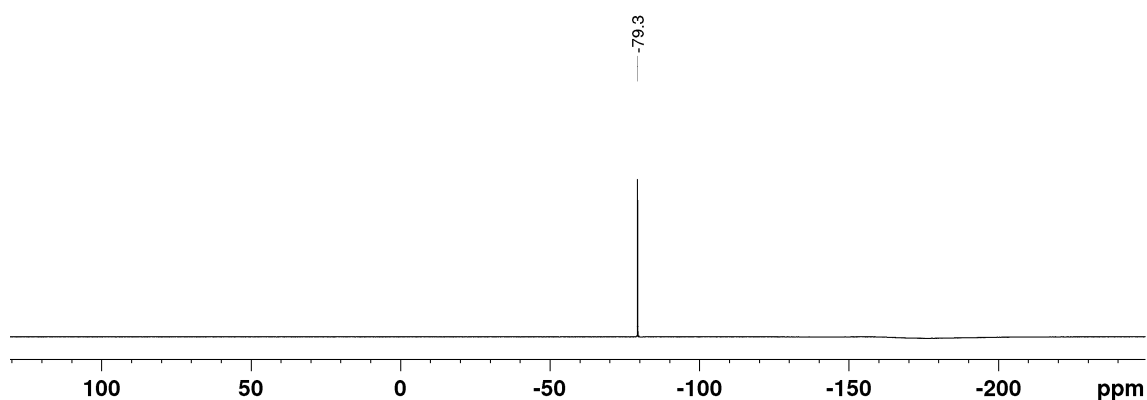

**Figure S49.**  $^{19}\text{F}\}$  NMR spectrum of **5c**[OTf] (300 K,  $\text{CD}_3\text{CN}$ ).

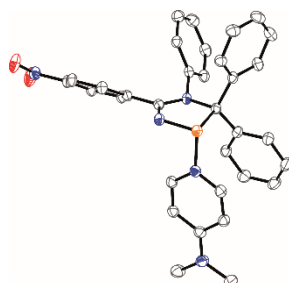

**Figure S50.** Molecular structure of **5c**<sup>+</sup> in **5c**[OTf]; hydrogen atoms and the anion are omitted for clarity and thermal ellipsoids are displayed at 50% probability (100 K).

## S2.12 Preparation of **7**

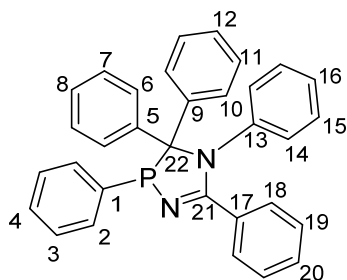

PhMgBr (0.2 M in THF, 2.26 mL, 0.45 mmol, 1 eq.) was added dropwise to a suspension of **5a**[OTf] (300 mg, 0.45 mmol, 1 eq.) in THF (5 mL). The mixture was stirred at room temperature

for 2 h, affording a yellow solution. The solvent was removed *in vacuo*, and the residue was filtered over silica using Et<sub>2</sub>O as eluent. Subsequent removal of the solvent *in vacuo* led to the isolation of a pale-yellow crystalline, air sensitive solid. Suitable crystals for X-ray diffraction analysis formed from an Et<sub>2</sub>O solution at room temperature.

**Yield:** 156 mg, 74%. **m.p.** 178 °C. **Raman** (100 mW, 50 scans, 298 K, [cm<sup>-1</sup>]): 3060 (21), 1600 (38), 1543 (15), 1334 (6), 1177 (12), 1164 (15), 1126 (6), 1089 (6), 1033 (15), 1004 (50), 677 (9), 619 (6), 334 (6), 263 (12), 238 (15), 222 (9), 205 (6), 140 (35), 93 (100). **IR** (ATR, 298 K, [cm<sup>-1</sup>]): 1586 (w), 1542 (w), 1488 (m), 1442 (w), 1434 (vw), 1331 (m), 1306 (w), 1290 (vw), 1250 (vw), 1125 (w), 1088 (vw), 1080 (vw), 1027 (vw), 1002 (vw), 984 (vw), 813 (w), 793 (m), 771 (w), 752 (s), 745 (m), 729 (s), 691 (vs), 660 (w), 619 (vw), 612 (w), 551 (vw), 525 (vw), 513 (vw), 501 (m), 453 (m). **<sup>1</sup>H NMR** (500.13 MHz, CD<sub>2</sub>Cl<sub>2</sub>, 300 K, in ppm): δ = 6.60 (2H, m, H14), 6.82 (3H, m, Ar-H), 6.84 (5H, m, Ar-H), 7.14 (4H, m, Ar-H), 7.23 (1H, m, H12), 7.26 (1H, m, H10), 7.31 (4H, m, H3, H4), 7.36 (1H, m, H20), 7.75 (4H, m, H18, H6). **<sup>13</sup>C{<sup>1</sup>H} NMR** (125.76 MHz, CD<sub>2</sub>Cl<sub>2</sub>, 300 K, in ppm): δ = 82.7 (1C, d, <sup>1</sup>J<sub>CP</sub> = 36 Hz, C22), 125.5 (1C, s, C16), 126.0 (2C, s, C19), 127.3 (2C, s, C15), 127.8 (1C, s, C20), 127.9 (2C, s, C14), 128.0 (1C, s, C4), 128.1 (2C, d, <sup>3</sup>J<sub>CP</sub> = 7 Hz, C10), 128.3 (2C, d, <sup>3</sup>J<sub>CP</sub> = 15 Hz, C3), 129.2 (2C, s, C7), 129.2 (2C, s, C11), 129.8 (1C, s, C8), 130.1 (2C, s, C18), 130.3 (1C, s, C12), 130.9 (2C, d, <sup>3</sup>J<sub>CP</sub> = 14 Hz, C6), 132.7 (2C, d, <sup>2</sup>J<sub>CP</sub> = 22 Hz, C2), 134.9 (1C, d, <sup>3</sup>J<sub>CP</sub> = 6 Hz, C13), 137.6 (1C, s, C9), 138.5 (1C, d, <sup>1</sup>J<sub>CP</sub> = 34 Hz, C1), 142.0 (1C, s, C5), 142.7 (1C, d, <sup>3</sup>J<sub>CP</sub> = 25 Hz, C17), 167.5 (1C, d, <sup>2</sup>J<sub>CP</sub> = 8 Hz, C21). **<sup>31</sup>P{<sup>1</sup>H} NMR** (202.46 MHz, CD<sub>2</sub>Cl<sub>2</sub>, 300 K, in ppm): δ = 98.1 (s). **Elemental analysis:** calculated for C<sub>32</sub>H<sub>25</sub>N<sub>2</sub>P 0.1 CH<sub>2</sub>Cl<sub>2</sub>: C, 80.82; H, 5.32; N, 5.87; found: C, 81.10; H, 5.272; N, 5.87.

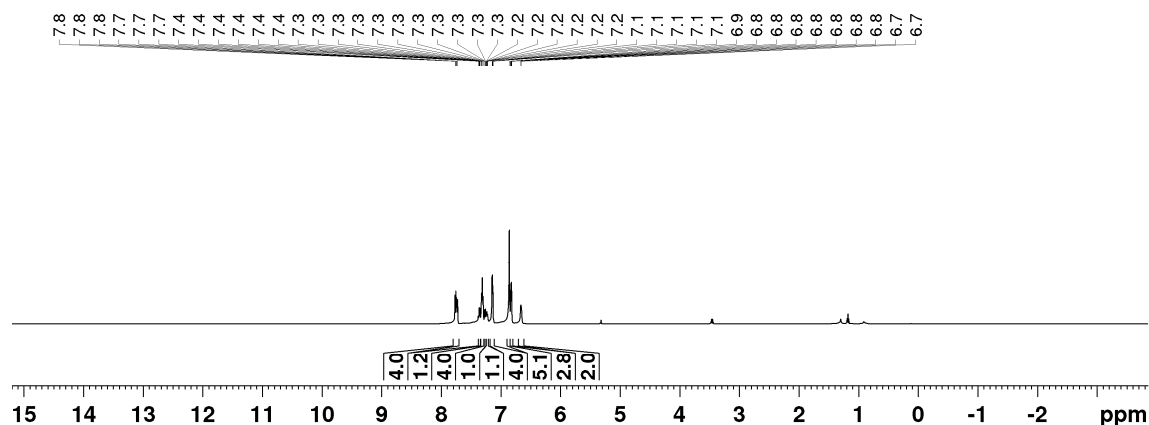

**Figure S51.** <sup>1</sup>H NMR spectrum of **7** (300 K, CD<sub>2</sub>Cl<sub>2</sub>).

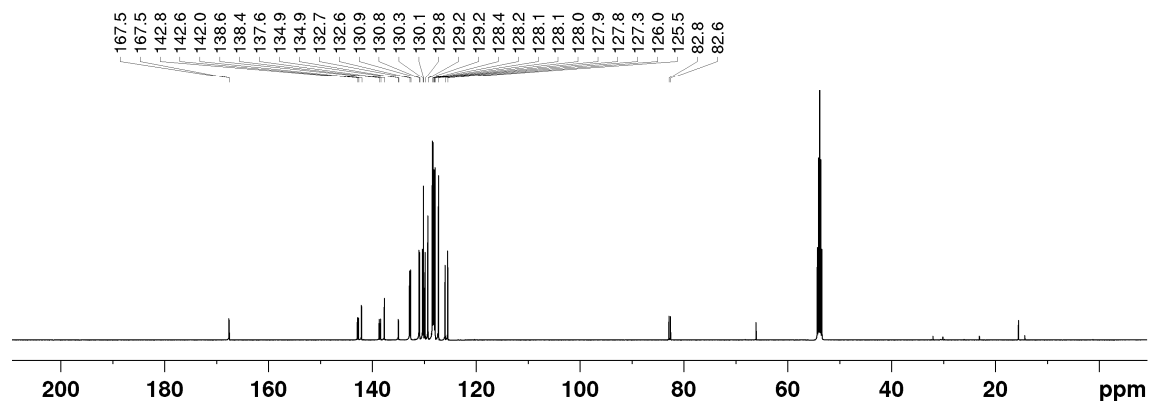

**Figure S52.** <sup>13</sup>C{<sup>1</sup>H} NMR spectrum of **7** (300 K, CD<sub>2</sub>Cl<sub>2</sub>).

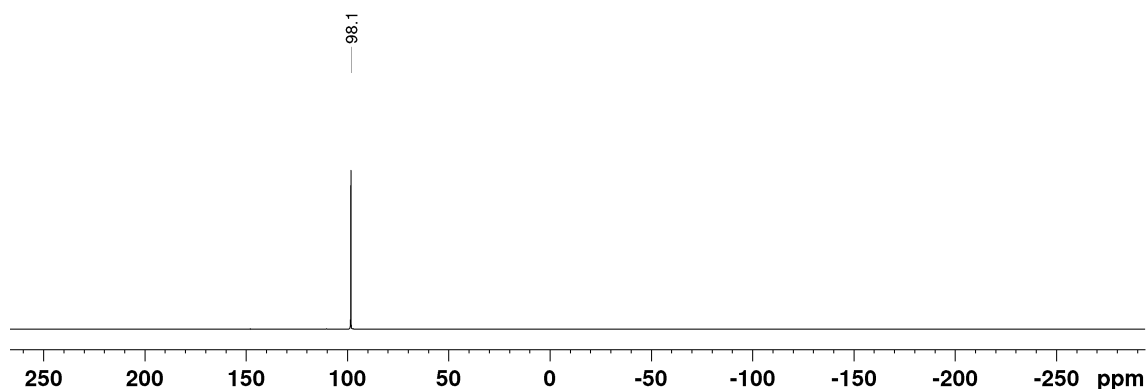

**Figure S53.**  $^{31}\text{P}\{^1\text{H}\}$  NMR spectrum of **7** (300 K,  $\text{CD}_2\text{Cl}_2$ ).

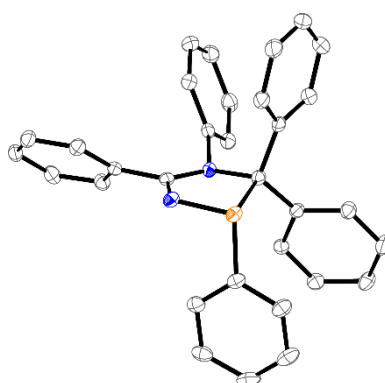

**Figure S54.** Molecular structure of **7**; hydrogen atoms are omitted for clarity and thermal ellipsoids are displayed at 50% probability (100 K).

## S2.13 Preparation of **8**

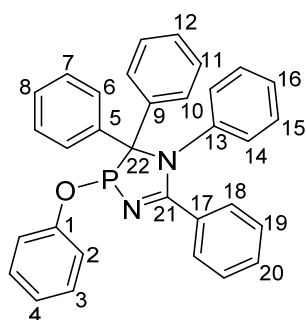

A suspension of PhOH (43 mg, 0.45 mmol, 1 eq.),  $\text{Et}_3\text{N}$  (92 mg, 127  $\mu\text{L}$ , 0.45 mmol, 1 eq.) and **5a**[OTf] (300 mg, 0.45 mmol, 1 eq.) in THF (4 mL) was heated at 60  $^\circ\text{C}$  for 2 hours. The solvent was removed *in vacuo* and the residue was filtered over silica using  $\text{Et}_2\text{O}$ /toluene (1:1) as eluent. Subsequent removal of the solvent *in vacuo* to obtain a white crystalline, air sensitive solid. Suitable crystals for X-ray diffraction analysis were obtained by layering a DCM solution with  $\text{Et}_2\text{O}$  at room temperature. KOPh can also be used under this condition to obtain **8**.

**Yield:** 152 mg, 69%. **m.p.** 189  $^\circ\text{C}$ . **Raman** (100 mW, 50 scans, 298 K,  $[\text{cm}^{-1}]$ ): 3064 (43), 1600 (66), 1521 (42), 1445 (10), 1352 (20), 1312 (5), 1279 (9), 1221 (7), 1206 (12), 1168 (18), 1031 (11), 1003 (75), 816 (8), 725 (10), 678 (11), 619 (7), 500 (5), 329 (7), 279 (7), 256 (11), 242 (9), 218 (6), 144 (19), 114 (66), 101 (90), 83 (100). **IR** (ATR, 298 K,  $[\text{cm}^{-1}]$ ): 1587 (vw), 1520 (vw), 1485 (m), 1454 (vw), 1444 (vw), 1349 (w), 1277 (vw), 1206 (m), 1163 (vw), 1140 (vw), 1025 (vw), 963 (vw), 899 (vw), 855 (w), 826 (m), 815 (w), 800 (w), 766 (w), 749 (s), 721 (w),

711 (w), 693 (vs), 662 (vw), 626 (vw), 612 (vw), 500 (w), 495 (w), 479 (w), 410 (vw). **<sup>1</sup>H NMR** (500.13 MHz, CD<sub>2</sub>Cl<sub>2</sub>, 300 K, [ppm]): δ = 6.77 (2H, m, H2), 6.85 (2H, m, H6), 6.93 (3H, m, H7, H8), 6.97 (1H, m, H4), 7.03 (3H, m, H15, H16), 7.12 (2H, m, H3), 7.38 (4H, m, H14, H19), 7.42 (2H, m, H12, H20), 7.52 (2H, m, H11), 7.79 (2H, m, H10), 7.82 (2H, m, H18). **<sup>13</sup>C{<sup>1</sup>H} NMR** (125.76 MHz, CD<sub>2</sub>Cl<sub>2</sub>, 300 K, [ppm]): δ = 83.6 (1C, d, <sup>1</sup>J<sub>CP</sub> = 47 Hz, C22), 119.8 (2C, d, <sup>3</sup>J<sub>CP</sub> = 9 Hz, C2), 123.0 (1C, s, C4), 125.1 (1C, s, C8), 126.8 (1C, s, C16), 127.1 (2C, s, C6), 127.4 (2C, s, C15), 127.9 (2C, s, C7), 128.0 (1C, s, C12), 128.1 (2C, s, C19), 128.3 (2C, s, C11), 129.3 (2C, s, C3), 129.9 (2C, d, <sup>3</sup>J<sub>CP</sub> = 12 Hz, C10), 130.2 (2C, d, <sup>4</sup>J<sub>CP</sub> = 1 Hz, C14), 130.4 (2C, s, C18), 130.6 (1C, s, C20), 133.8 (1C, d, <sup>3</sup>J<sub>CP</sub> = 4 Hz, C17), 135.0 (1C, d, <sup>3</sup>J<sub>CP</sub> = 1 Hz, C13), 138.0 (1C, d, <sup>2</sup>J<sub>CP</sub> = 32 Hz, C9), 140.6 (1C, s, C5), 155.9 (1C, d, <sup>2</sup>J<sub>CP</sub> = 9 Hz, C1), 169.7 (1C, d, <sup>2</sup>J<sub>CP</sub> = 11 Hz, C21). **<sup>31</sup>P{<sup>1</sup>H} NMR** (202.46 MHz, CD<sub>2</sub>Cl<sub>2</sub>, 300 K, in ppm): δ = 147.5 (s). **Elemental analysis:** calculated for C<sub>32</sub>H<sub>25</sub>N<sub>2</sub>OP: C, 79.32; H, 5.20; N, 5.78; found: C, 79.13; H, 5.330; N, 5.66.

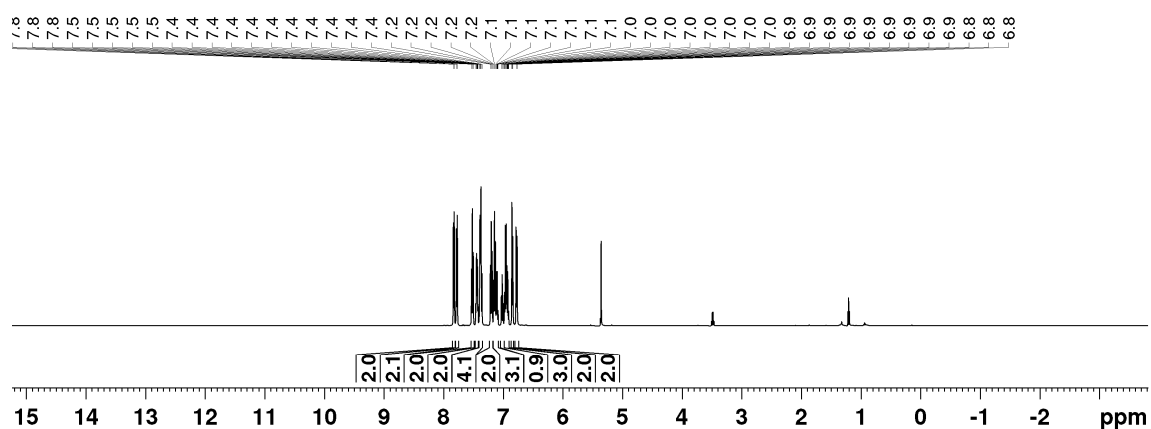

**Figure S55.** <sup>1</sup>H NMR spectrum of **8** (300 K, CD<sub>2</sub>Cl<sub>2</sub>).

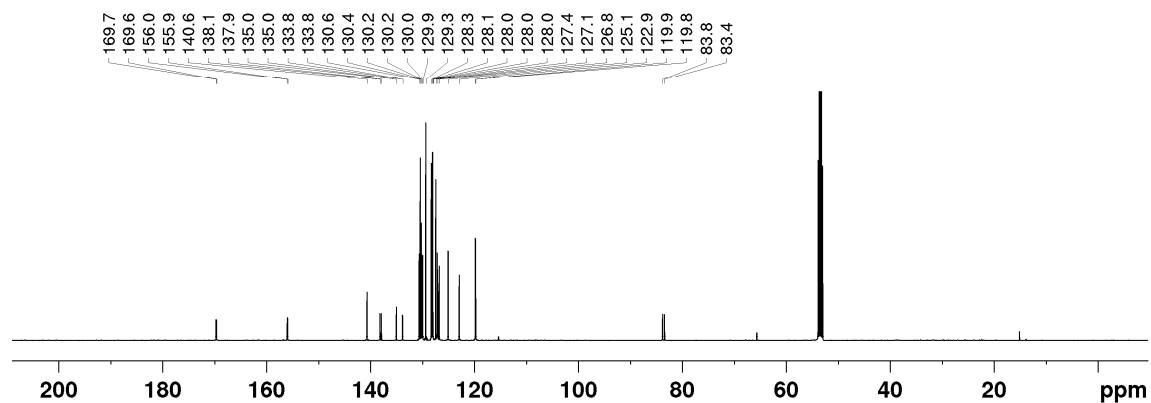

**Figure S56.** <sup>13</sup>C{<sup>1</sup>H} NMR spectrum of **8** (300 K, CD<sub>2</sub>Cl<sub>2</sub>).

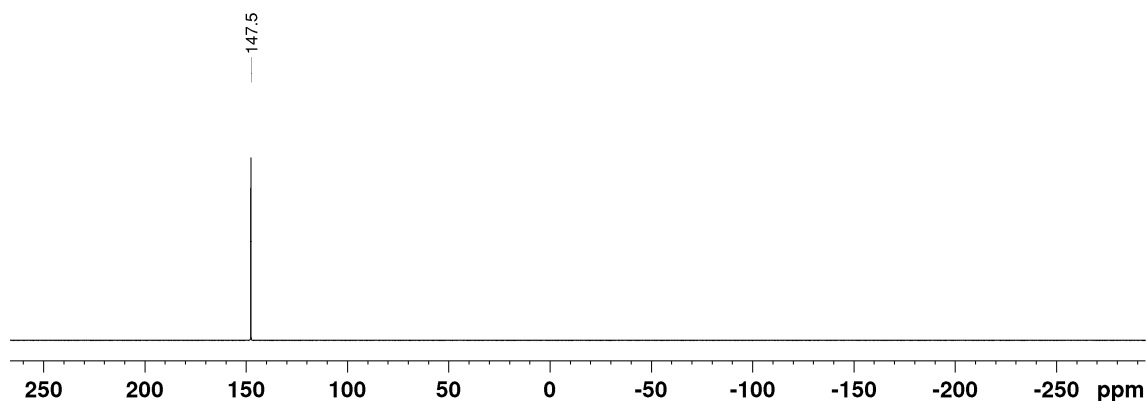

**Figure S57.**  $^{31}\text{P}\{^1\text{H}\}$  NMR spectrum of **8** (300 K,  $\text{CD}_2\text{Cl}_2$ ).

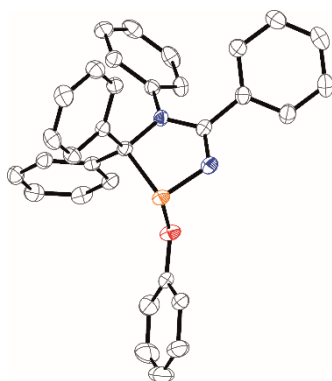

**Figure S58.** Molecular structure of **8**; hydrogen atoms are omitted for clarity and thermal ellipsoids are displayed at 50% probability (100 K).

## S2.14 Preparation of **9**

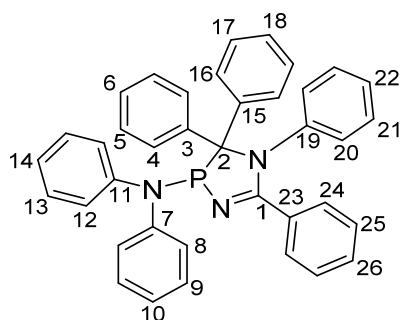

THF (3 mL) was added to a mixture of **5a**[OTf] (150 mg, 0.23 mmol, 1 eq.) and  $\text{KNPh}_2$  (47 mg, 0.23 mmol, 1 eq.). The mixture was stirred at room temperature for 2 h to afford a yellow solution. The solvent was removed *in vacuo* and the residue dissolved in  $\text{Et}_2\text{O}$  and filtered over silica using  $\text{Et}_2\text{O}$  as eluent. Subsequent removal of the solvent *in vacuo* obtained a pale yellow crystalline, air sensitive solid. Suitable crystals for X-ray diffraction analysis obtained by layering a DCM solution with  $\text{Et}_2\text{O}$  at room temperature.

**Yield:** 81 mg, 64%. **m.p.** 240 °C. **Raman** (100 mW, 50 scans, 298 K,  $[\text{cm}^{-1}]$ ): 3065 (57), 1598 (75), 1526 (31), 1445 (9), 1343 (14), 1284 (12), 1226 (9), 1192 (21), 1174 (18), 1160 (17), 1031 (23), 1003 (100), 802 (11), 674 (20), 619 (13), 326 (9), 242 (11), 88 (88). **IR** (ATR, 298 K,  $[\text{cm}^{-1}]$ ): 3061 (vw), 3031 (vw), 2361 (vw), 2342 (vw), 1585 (w), 1533 (w), 1484 (s), 1443 (w), 1343 (m), 1309 (vw), 1276 (vw), 1255 (m), 1191 (w), 1176 (w), 1158 (vw), 1136 (vw), 1074

(vw), 1027 (w), 1018 (vw), 1002 (vw), 989 (vw), 949 (m), 923 (vw), 909 (vw), 890 (w), 880 (vw), 832 (m), 808 (w), 798 (w), 758 (s), 745 (m), 720 (vw), 692 (vs), 660 (w), 625 (w), 619 (vw), 598 (w), 552 (vw), 529 (s), 515 (w), 502 (w), 494 (w), 467 (vw), 448 (vw), 428 (vw), 405 (vw). **<sup>1</sup>H NMR** (500.13 MHz, CD<sub>2</sub>Cl<sub>2</sub>, 300 K, in ppm): δ = 6.39 (2H, m, Ar-H), 6.71 (2H, m, Ar-H), 6.89 (3H, m, Ar-H), 6.97 (1H, m, Ar-H), 7.10 (4H, m, Ar-H), 7.12 (3H, m, Ar-H), 7.28 (4H, m, Ar-H), 7.34 (3H, m, Ar-H), 7.42 (2H, m, Ar-H), 7.50 (2H, m, Ar-H), 7.55 (2H, m, Ar-H), 7.81 (2H, m, Ar-H). **<sup>13</sup>C{<sup>1</sup>H} NMR** (125.76 MHz, CD<sub>2</sub>Cl<sub>2</sub>, 300 K, in ppm): δ = 81.7 (1C, d, <sup>1</sup>J<sub>CP</sub> = 57 Hz, C2), 122.7 (2C, br, Ar-C), 123.3 (2C, br, Ar-C), 124.9 (1C, s, Ar-C), 125.1 (1C, s, Ar-C), 126.3 (1C, s, Ar-C), 126.7 (2C, s, Ar-C), 127.3 (2C, s, Ar-C), 127.6 (2C, s, Ar-C), 127.8 (2C, s, Ar-C), 128.0 (2C, s, Ar-C), 128.2 (2C, s, Ar-C), 128.3 (2C, s, Ar-C), 129.1 (2C, br, Ar-C), 129.2 (1C, s, Ar-C), 129.7 (1C, s, Ar-C), 129.9 (1C, s, Ar-C), 130.2 (2C, s, Ar-C), 130.4 (2C, s, Ar-C), 134.0 (1C, d, <sup>3</sup>J<sub>CP</sub> = 4 Hz, Ar-C), 136.7 (1C, d, <sup>3</sup>J<sub>CP</sub> = 2 Hz, Ar-C), 140.9 (1C, s, Ar-C), 141.9 (1C, d, <sup>1</sup>J<sub>CP</sub> = 35 Hz, Ar-C), 144.5 (1C, s, Ar-C), 150.3 (1C, s, Ar-C), 165.8 (1C, d, <sup>2</sup>J<sub>CP</sub> = 10 Hz, C1). **<sup>31</sup>P{<sup>1</sup>H} NMR** (202.46 MHz, CD<sub>2</sub>Cl<sub>2</sub>, 300 K, in ppm): δ = 108.4 (s). **Elemental analysis:** calculated for C<sub>38</sub>H<sub>30</sub>N<sub>3</sub>P: C, 81.55; H, 5.40; N, 7.51; found: C, 81.07; H, 5.314; N, 7.70.

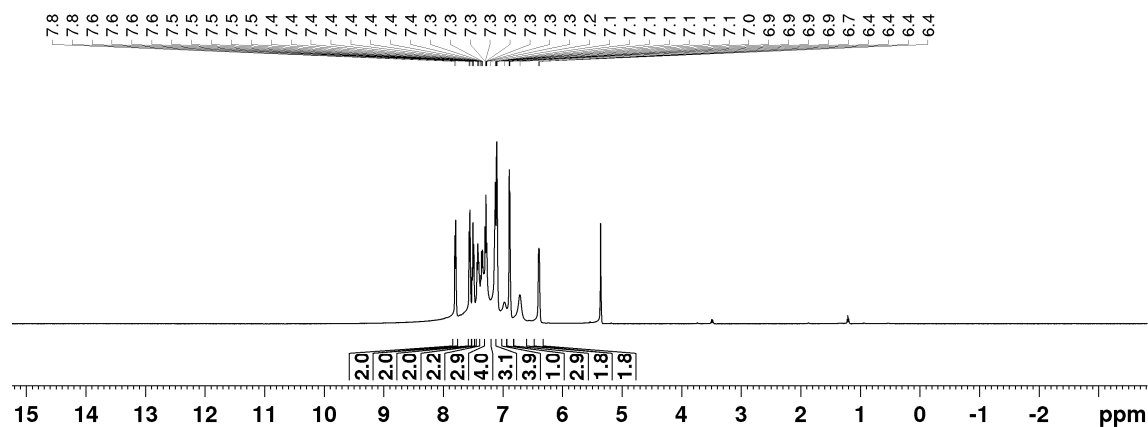

Figure S59. <sup>1</sup>H NMR spectrum of **9** (300 K, CD<sub>2</sub>Cl<sub>2</sub>).

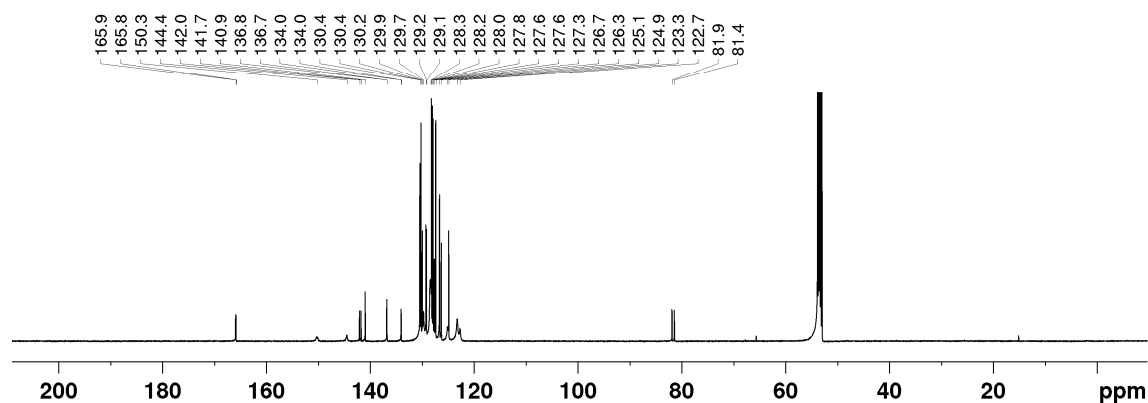

Figure S60. <sup>13</sup>C{<sup>1</sup>H} NMR spectrum of **9** (300 K, CD<sub>2</sub>Cl<sub>2</sub>).

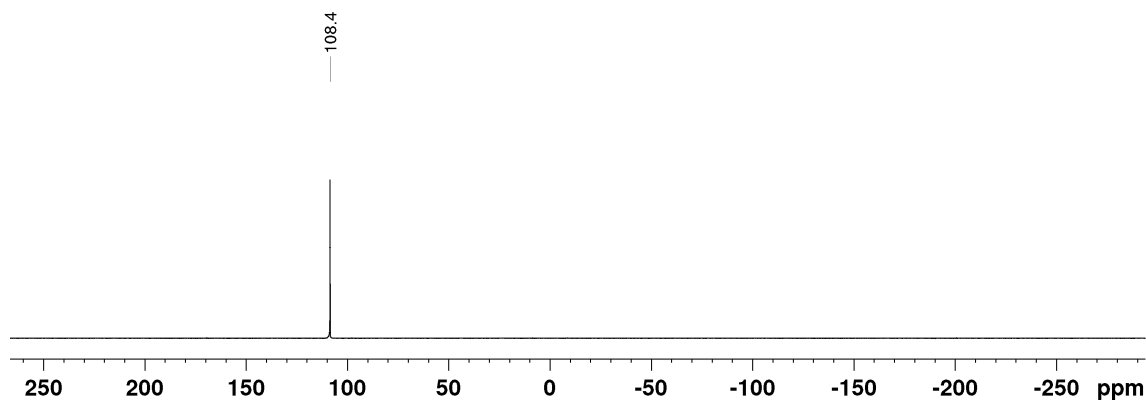

**Figure S61.**  $^{31}\text{P}\{^1\text{H}\}$  NMR spectrum of **9** (300 K,  $\text{CD}_2\text{Cl}_2$ ).

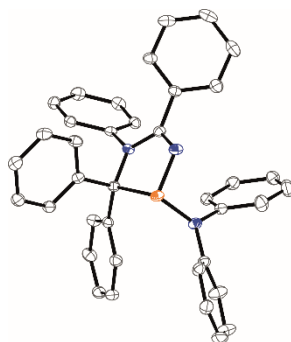

**Figure S62.** Molecular structure of **9**; hydrogen atoms are omitted for clarity and thermal ellipsoids are displayed at 50% probability (100 K).

## S2.15 Preparation of **10**[OTf]

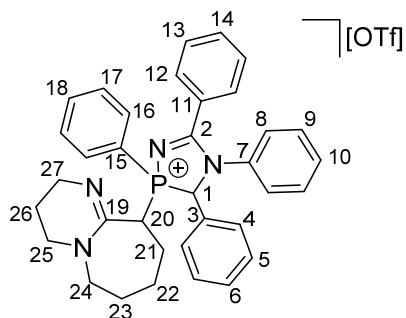

DBU (175 mg, 1.15 mmol, 1 eq.) in THF (5 mL) was added to a suspension of **3a**[OTf]<sub>2</sub> (1.0 g, 1.15 mmol, 1 eq.) in THF (15 mL). The suspension turned into yellow solution after 30 min from which a colorless solid precipitated for 16 h. The suspension was filtered and washed with THF and Et<sub>2</sub>O (3 × 2 mL) to afford a white, air and moisture sensitive solid. Suitable crystals for X-ray diffraction analysis were obtained by layering a DCM solution with Et<sub>2</sub>O at -30 °C.

**Yield:** 648 mg, 78%. **m.p.:** 245 °C (decomp.). **Raman** (100 mW, 50 scans, 298 K, [cm<sup>-1</sup>]): 3065 (18), 3050 (16), 2972 (9), 2938 (9), 2903 (7), 2858 (10), 1603 (47), 1553 (7), 1447 (9), 1384 (6), 1291 (7), 1223 (17), 1033 (26), 1002 (62), 755 (6), 731 (11), 618 (7), 312 (5), 267 (7), 221 (8), 184 (6), 98 (100). **IR** (ATR, 298 K, [cm<sup>-1</sup>]): 3059 (vw), 3049 (vw), 2971 (vw), 2933 (vw), 2909 (vw), 2893 (vw), 2860 (vw), 1632 (w), 1604 (vw), 1585 (vw), 1551 (w), 1489 (w), 1459 (vw), 1445 (vw), 1439 (vw), 1377 (w), 1351 (vw), 1342 (vw), 1311 (vw), 1262 (vs), 1220 (w), 1186 (vw), 1151 (s), 1136 (m), 1111 (w), 1099 (vw), 1082 (vw), 1076 (vw), 1065 (vw), 1028

(s), 993 (vw), 949 (vw), 923 (vw), 870 (vw), 846 (vw), 828 (m), 777 (m), 763 (m), 747 (vw), 729 (m), 709 (m), 699 (s), 688 (m), 661 (vw), 635 (vs), 616 (w). **<sup>1</sup>H NMR** (500.13 MHz, CD<sub>2</sub>Cl<sub>2</sub>, 300 K, in ppm): δ = 8.09 (m, Ar-H, 2H), 7.75 (m, Ar-H, 3H), 7.60 (m, Ar-H, 4H), 7.53 (m, Ar-H, 3H), 7.47 (m, Ar-H, 1H), 7.35 (m, Ar-H, 2H), 7.12 (m, Ar-H, 3H), 6.68 (m, Ar-H, 2H), 5.53 (d, H1, <sup>2</sup>J<sub>HP</sub> = 14 Hz, 1H), 4.14 (dd, H20, <sup>2</sup>J<sub>HP</sub> = <sup>3</sup>J<sub>HH</sub> = 12 Hz, 1H), 3.29 (m, DBU-H, 4H), 3.00 (m, DBU-H, 2H), 2.79 (m, 1H), 2.17 (m, DBU-H, 1H), 1.91 (m, DBU-H, 2H), 1.78 (m, DBU-H, 1H), 1.60 (m, DBU-H, 1H), 1.45 (m, DBU-H, 2H). **<sup>13</sup>C{<sup>1</sup>H} NMR** (125.76 MHz, CD<sub>2</sub>Cl<sub>2</sub>, 300 K, in ppm) : δ = 20.8 (1C, s, C26), 26.5 (1C, d, <sup>2</sup>J<sub>CP</sub> = 6 Hz, C21), 29.0 (1C, s, C27), 29.5 (1C, s, C25), 29.7 (1C, s, C24), 44.0 (1C, s, C22), 47.9 (1C, s, C23), 59.6 (1C, d, <sup>1</sup>J<sub>CP</sub> = 104 Hz, C20), 67.7 (1C, d, <sup>1</sup>J<sub>CP</sub> = 76 Hz, C1), 122.7 (1C, 1, <sup>1</sup>J<sub>CF</sub> = 321 Hz, OTf), 127.5 (1C, s, C18), 128.2 (2C, s, C10), 128.6 (2C, s, C9), 129.7 (2C, d, <sup>3</sup>J<sub>CP</sub> = 3 Hz, C4), 129.8 (1C, s, C6), 130.0 (2C, s, C8), 130.1 (1C, s, C18), 130.2 (2C, s, C12), 131.4 (1C, d, <sup>2</sup>J<sub>CP</sub> = 12 Hz, C3), 132.0 (1C, s, C14), 132.9 (1C, s, C11), 133.5 (2C, d, <sup>2</sup>J<sub>CP</sub> = 10 Hz, C16), 133.6 (2C, d, <sup>3</sup>J<sub>CP</sub> = 3 Hz, C17), 134.4 (1C, d, <sup>3</sup>J<sub>CP</sub> = 3 Hz, C7), 140.9 (1C, d, <sup>1</sup>J<sub>CP</sub> = 11 Hz, C15), 159.5 (1C, d, <sup>2</sup>J<sub>CP</sub> = 3 Hz, C19), 169.0 (1C, d, <sup>2</sup>J<sub>CP</sub> = 5 Hz, C2). **<sup>19</sup>F{<sup>1</sup>H} NMR** (470.59 MHz, CD<sub>2</sub>Cl<sub>2</sub>, 300 K, in ppm): δ = -78.8 (s, OTf). **<sup>31</sup>P{<sup>1</sup>H} NMR** (202.46 MHz, CD<sub>2</sub>Cl<sub>2</sub>, 300 K, in ppm): δ = 23.4 (s) (86%), 18.0 (s) (14%). **Elemental analysis**: calculated for C<sub>36</sub>H<sub>36</sub>F<sub>3</sub>N<sub>4</sub>O<sub>3</sub>PS 0.1 CH<sub>2</sub>Cl<sub>2</sub>: C, 61.83; H, 5.20; N, 7.99; S, 4.57; found: C, 61.86; H, 4.971; N, 7.92; S, 4.670.

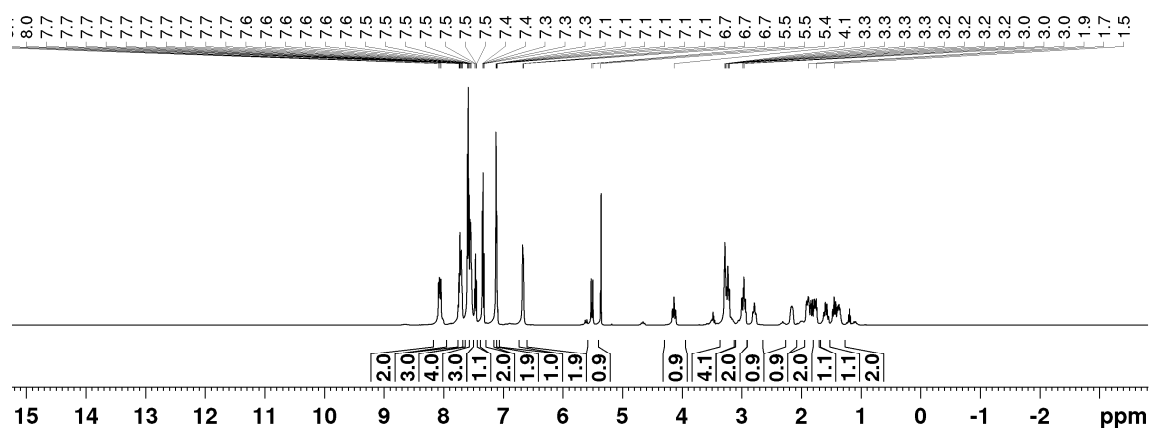

Figure S63. <sup>1</sup>H NMR spectrum of 10[OTf] (300 K, CD<sub>2</sub>Cl<sub>2</sub>).

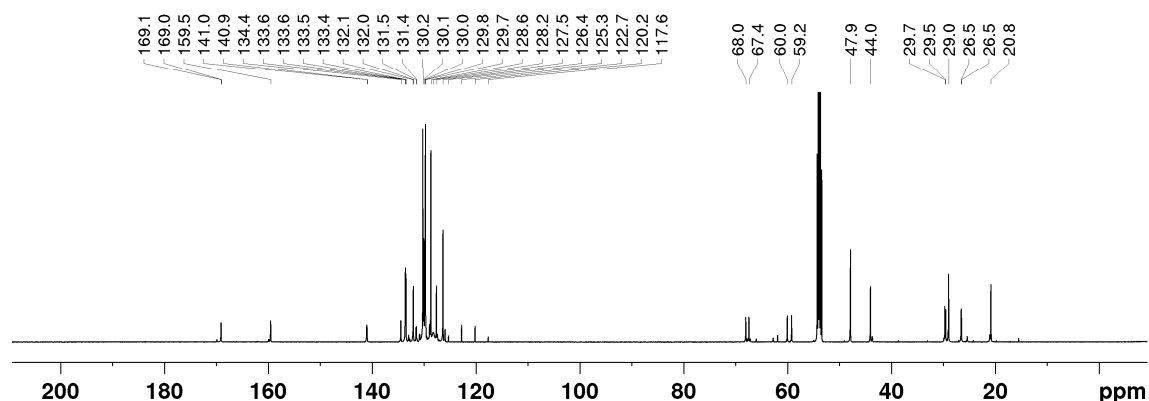

Figure S64. <sup>13</sup>C{<sup>1</sup>H} NMR spectrum of 10[OTf] (300 K, CD<sub>2</sub>Cl<sub>2</sub>).

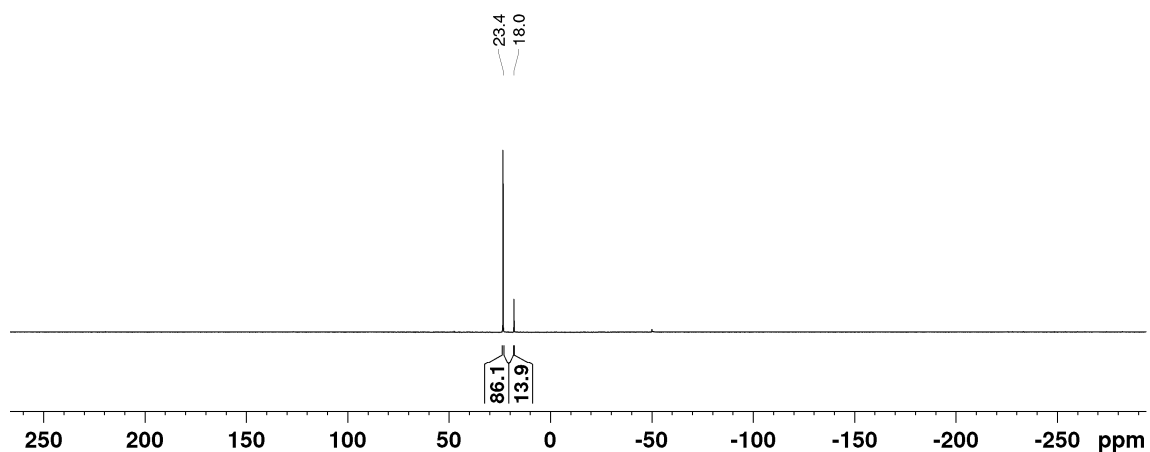

**Figure S65.**  $^{31}\text{P}\{^1\text{H}\}$  NMR spectrum of **10**[OTf] (300 K,  $\text{CD}_2\text{Cl}_2$ ).

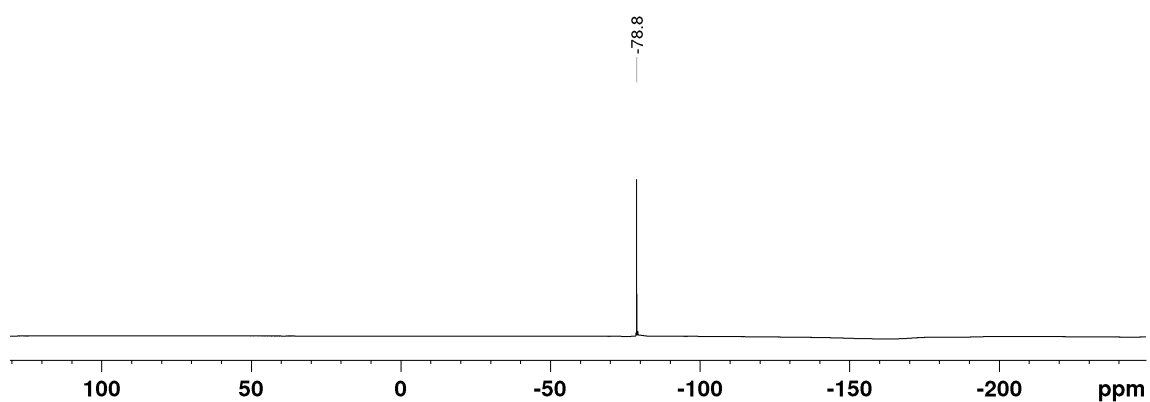

**Figure S66.**  $^{19}\text{F}\{^1\text{H}\}$  NMR spectrum of **10**[OTf] (300 K,  $\text{CD}_2\text{Cl}_2$ ).

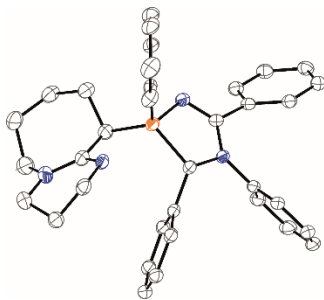

**Figure S67.** Molecular structure of *syn*-**10**<sup>+</sup> in *syn*-**10**[OTf]; hydrogen atoms and the anion are omitted for clarity and thermal ellipsoids are displayed at 50% probability (100 K).

## S2.16 Preparation of **11**

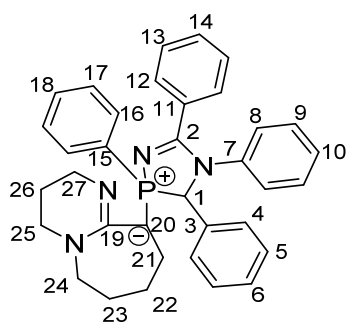

Solid KHMDS (95%) (157 mg, 0.75 mmol, 1 eq.) was added to a suspension of **10**[OTf] (520 mg, 0.75 mmol, 1eq.) in THF (10 mL) at room temperature. The suspension turned to red immediately and gradually changed to orange in 30 minutes. After stirring for 2 h, all volatiles were removed *in vacuo*. The residue was extracted with Et<sub>2</sub>O (2 × 5 mL), and the combined filtrates were concentrated *in vacuo* to dryness to afford the product as an orange powder. Suitable crystals for X-ray diffraction analysis can obtain by layering an Et<sub>2</sub>O solution with *n*-hexane at room temperature. The solid decomposed slowly in the glovebox under N<sub>2</sub> atmosphere.

**Yield:** 203 mg, 86%. **m.p.:** 140°C (decomp.). **Raman** (100 mW, 50 scans, 298 K, [cm<sup>-1</sup>]): 3071 (37), 3056 (63), 2951 (20), 2921 (25), 2817 (24), 1611 (100), 1575 (29), 1196 (16), 1001 (65), 92 (85), 73 (86). **IR** (ATR, 298 K, [cm<sup>-1</sup>]): 2921 (vw), 2813 (vw), 2360 (w), 2341 (w), 1610 (vw), 1557 (m), 1491 (w), 1433 (w), 1348 (w), 1304 (w), 1264 (w), 1231 (m), 1189 (w), 1096 (m), 1026 (w), 912 (w), 789 (s), 760 (m), 732 (s), 717 (m), 690 (vs), 631 (s), 594 (m), 535 (m), 516 (m), 490 (m). **<sup>1</sup>H NMR** (500.13 MHz, C<sub>6</sub>D<sub>6</sub>, 300 K, in ppm): δ = 1.24 (2H, m, H26), 1.44 (3H, m, H22), 1.58 (1H, m, DBU-H), 1.76 (1H, m, DBU-H), 2.26 (2H, m, DBU-H), 2.32 (3H, m, H24, DBU-H), 2.37 (1H, m, DBU-H), 3.05 (1H, m, DBU-H), 5.09 (1H, d, <sup>2</sup>J<sub>HP</sub> = 12.7 Hz, H1), 6.70 (1H, m, H10), 6.80 (2H, m, H9), 6.90 (5H, m, Ar-H), 7.15 (3H, m, Ar-H), 7.24 (4H, m, Ar-H), 7.54 (2H, m, Ar-H), 7.77 (2H, m, H13), 7.89 (2H, m, H12). **<sup>13</sup>C{<sup>1</sup>H} NMR** (125.76 MHz, C<sub>6</sub>D<sub>6</sub>, 300 K, in ppm): δ = 23.0 (1C, s, C26), 26.7 (1C, d, <sup>3</sup>J<sub>CP</sub> = 6 Hz, C22), 30.5 (1C, s, C3), 30.7 (1C, d, <sup>2</sup>J<sub>CP</sub> = 19 Hz, C21), 41.0 (1C, d, <sup>4</sup>J<sub>CP</sub> = 6 Hz, C27), 48.8 (1C, s, C24), 55.4 (1C, s, C25), 61.1 (1C, d, <sup>1</sup>J<sub>CP</sub> = 165 Hz, C20), 66.1 (1C, d, <sup>1</sup>J<sub>CP</sub> = 79 Hz, C1), 123.8 (1C, s, C10), 124.1 (2C, s, C9), 126.7 (2C, s, Ar-C), 127.0 (2C, s, Ar-C), 127.6 (2C, s, Ar-C), 127.8 (2C, s, C13), 128.0 (2C, s, Ar-C), 128.1 (1C, s, Ar-C), 128.2 (1C, s, Ar-C), 128.6 (2C, s, Ar-C), 129.4 (1C, s, Ar-C), 129.8 (2C, s, C12), 134.7 (1C, d, <sup>2</sup>J<sub>CP</sub> = 11 Hz, C3), 140.2 (1C, s, C11), 141.3 (1C, d, <sup>1</sup>J<sub>CP</sub> = 141 Hz, C15), 145.3 (1C, d, <sup>3</sup>J<sub>CP</sub> = 10 Hz, C7), 160.3 (1C, d, <sup>3</sup>J<sub>CP</sub> = 5 Hz, C2), 161.6 (1C, d, <sup>2</sup>J<sub>CP</sub> = 13 Hz, C19). **<sup>31</sup>P{<sup>1</sup>H} NMR** (202.46 MHz, C<sub>6</sub>D<sub>6</sub>, 300 K, in ppm): δ = -23.5 (s). **Elemental analysis:** calculated for C<sub>35</sub>H<sub>35</sub>N<sub>4</sub>P 0.1 KOTf: C, 75.08; H, 6.28; N, 9.98; S, 0.57; found: C, 74.92; H, 6.073; N, 9.73; S, 0.057.

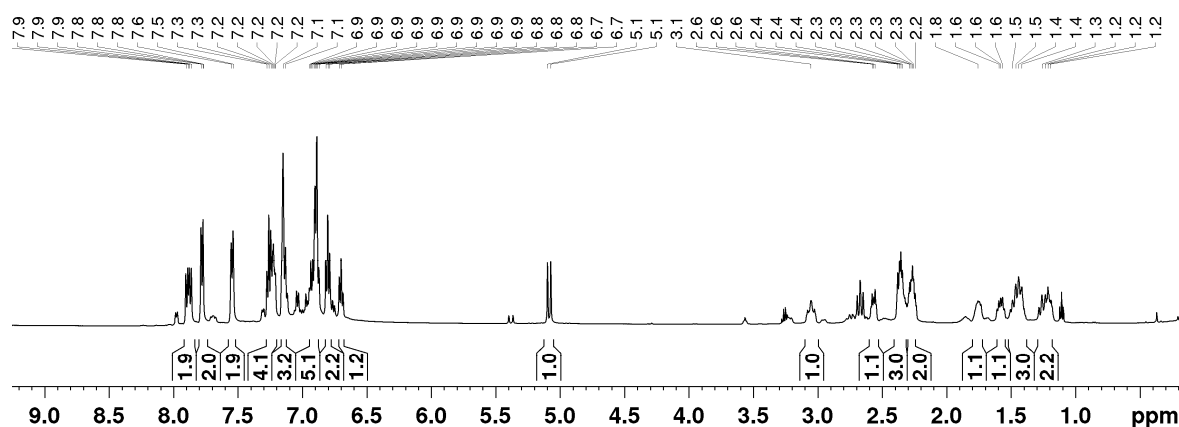

**Figure S68.** <sup>1</sup>H NMR spectrum of **11** (300 K, C<sub>6</sub>D<sub>6</sub>).

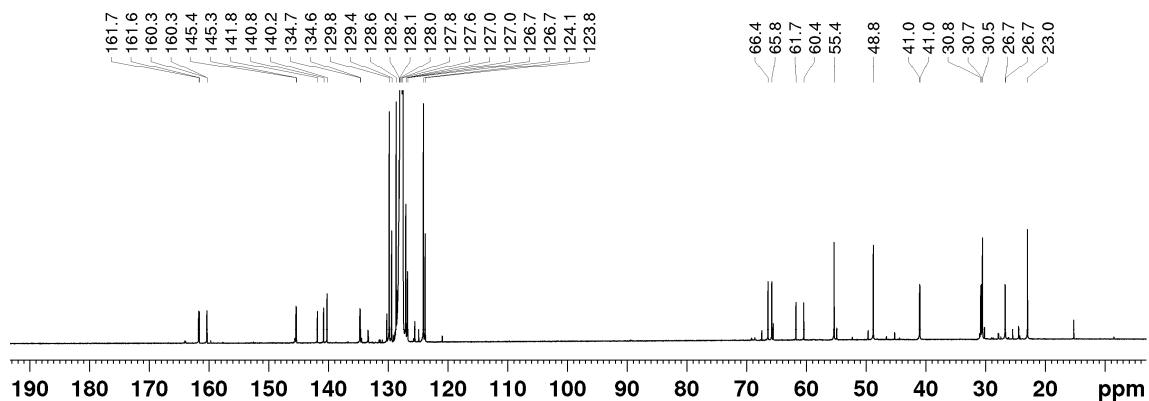

**Figure S69.**  $^{13}\text{C}$  {H} NMR spectrum of **11** (300 K,  $\text{C}_6\text{D}_6$ ).

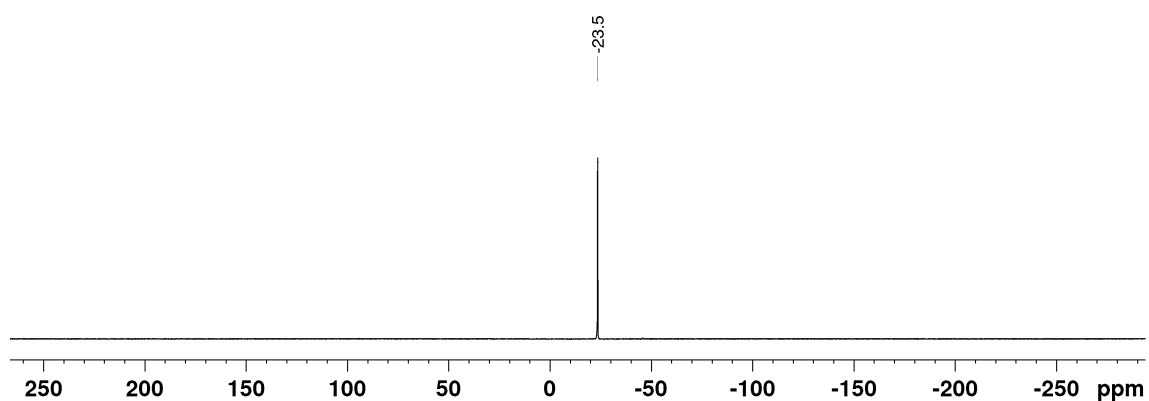

**Figure S70.**  $^{31}\text{P}$  NMR spectrum of **11** (300 K,  $\text{C}_6\text{D}_6$ ).

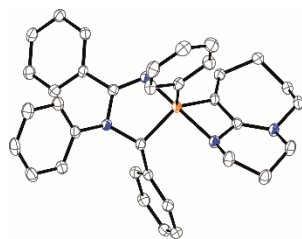

**Figure S71.** Molecular structure of **11**; hydrogen atoms are omitted for clarity and thermal ellipsoids are displayed at 50% probability (100 K).

## S2.17 Preparation of **13**[OTf]

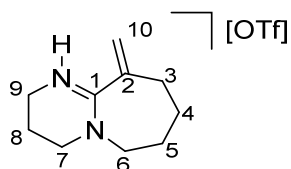

A mixture of **10**[OTf] (500 mg, 0.72 mmol, 1 eq.) and KHMDS (95%) (152 mg, 0.72 mmol, 1 eq.) in THF (10 mL) was allowed to stir at room temperature for 2 h. Paraformaldehyde (22 mg, 0.72 mmol, 1 eq.) was then added to the resulting orange solution, and the mixture was stirred for 16 h at room temperature. Silica (100 mg) was added to the solution and the mixture was stirred for 10 min. All volatiles were removed *in vacuo* and the crude mixture was purified

by column chromatography: Et<sub>2</sub>O elution phase, phosphole oxide **12**, 154 mg, yield: 52%; DCM elution phase, **13**[OTf] 169 mg.

Yield: 74%. **m.p.** 63 °C. **Raman** (100 mW, 50 scans, 298 K, [cm<sup>-1</sup>]): 3098 (9), 2993 (36), 2959 (70), 2931 (36), 2896 (26), 2864 (27), 2210 (8), 1653 (27), 1628 (20), 1458 (33), 1449 (32), 1415 (17), 1336 (12), 1285 (18), 1276 (23), 1247 (12), 1224 (20), 1091 (14), 1080 (11), 1059 (15), 1029 (100), 999 (14), 904 (9), 891 (12), 814 (14), 756 (38), 712 (27), 605 (20), 574 (18), 492 (12), 410 (12), 350 (52), 334 (11), 313 (41), 278 (20), 252 (24), 232 (11), 149 (41), 77 (91). **IR** (ATR, 298 K, [cm<sup>-1</sup>]): 3258 (vw), 3133 (vw), 2954 (vw), 2864 (vw), 1731 (vw), 1651 (w), 1626 (m), 1579 (w), 1447 (vw), 1414 (vw), 1378 (vw), 1366 (vw), 1323 (w), 1285 (s), 1271 (m), 1246 (vs), 1223 (s), 1209 (s), 1158 (s), 1138 (s), 1056 (vw), 1026 (vs), 996 (w), 959 (vw), 931 (m), 905 (vw), 892 (vw), 834 (vw), 813 (vw), 756 (w), 709 (vw), 678 (vw), 633 (vs), 573 (m), 516 (s), 492 (vw), 463 (vw), 407 (vw). **<sup>1</sup>H NMR** (500.13 MHz, CDCl<sub>3</sub>, 300 K, [ppm]): δ = 1.76 (4H, m, H5, H6), 2.08 (2H, quint, <sup>3</sup>J<sub>HH</sub> = 5.8 Hz, H8), 2.40 (2H, m, H3), 3.45 (2H, m, H4), 3.50 (2H, m, H7), 3.55 (2H, t, <sup>3</sup>J<sub>HH</sub> = 5.9 Hz, H9), 5.66 (2H, d, <sup>2</sup>J<sub>HH</sub> = 28.0 Hz, H10), 8.98 (1H, s, NH). **<sup>13</sup>C{<sup>1</sup>H} NMR** (125.76 MHz, CDCl<sub>3</sub>, 300 K, [ppm]): (125.76 MHz, CD<sub>2</sub>Cl<sub>2</sub>, 300 K, in ppm): δ = 19.6 (1C, s, C8), 26.0 (1C, s, C6), 28.5 (1C, s, C5), 32.7 (1C, s, C3), 38.6 (1C, s, C9), 48.4 (1C, s, C7), 54.7 (1C, s, C4), 121.9 (1C, q, <sup>1</sup>J<sub>CF</sub> = 121 Hz, OTf), 125.6 (1C, s, C10), 139.4 (1C, s, C2), 164.2 (1C, s, C1). **<sup>19</sup>F{<sup>1</sup>H} NMR** (470.59 MHz, CDCl<sub>3</sub>, 300 K, [ppm]): δ = -78.4 (s, OTf). **Elemental analysis**: calculated for C<sub>11</sub>H<sub>17</sub>F<sub>3</sub>N<sub>2</sub>O<sub>3</sub>S: C, 42.03; H, 5.45; N, 8.91; S, 10.20; found: C, 42.20; H, 5.362; N, 8.69; S, 10.118.

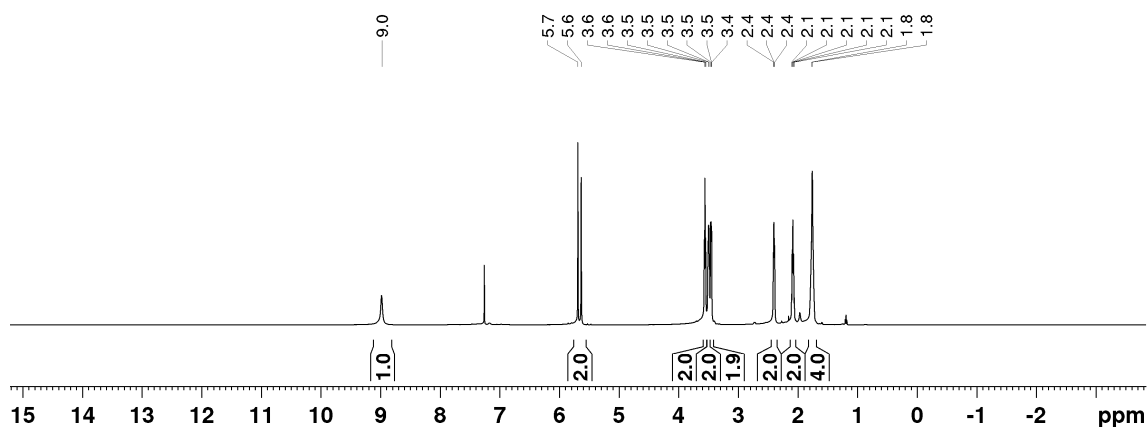

Figure S72. <sup>1</sup>H NMR spectrum of **13**[OTf] (300 K, CDCl<sub>3</sub>).

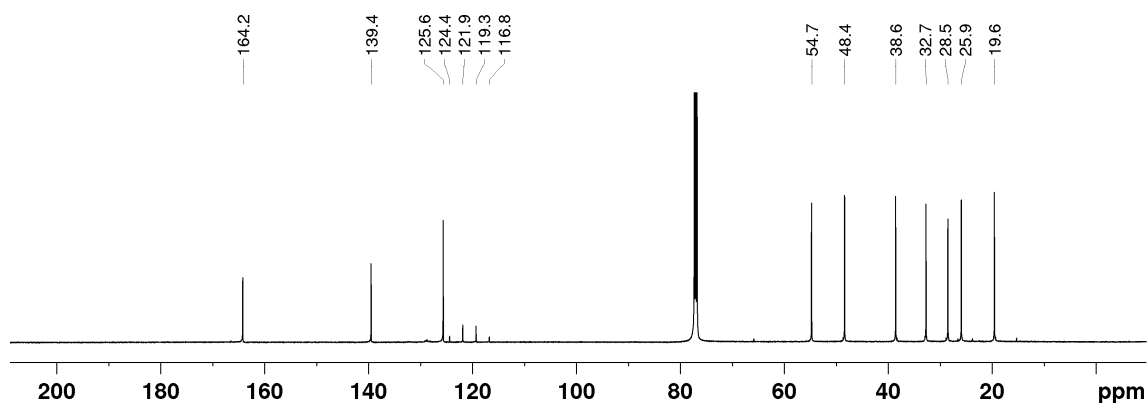

Figure S73. <sup>13</sup>C{<sup>1</sup>H} NMR spectrum of **13**[OTf] (300 K, CDCl<sub>3</sub>).

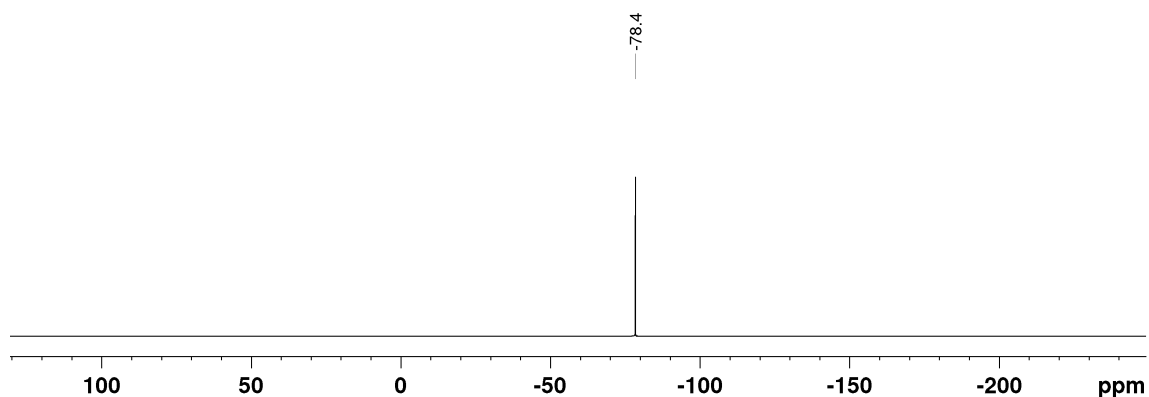

Figure S74.  $^{19}\text{F}\{^1\text{H}\}$  NMR spectrum of **13**[OTf] (300 K,  $\text{CDCl}_3$ ).

## S2.18 Preparation of **14**[OTf]

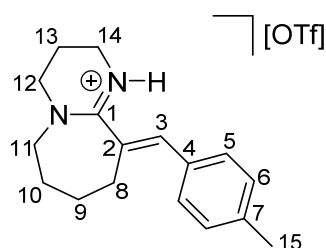

A mixture of KHMDS (95%) (152 mg, 0.72 mmol, 1 eq.) and **10**[OTf] (500 mg, 0.72 mmol, 1 eq.) were combined in THF (10 mL) in a 50 mL pressured flask and stirred at room temperature for 2 h. 4-Methylbenzaldehyde (87 mg, 0.72 mmol, 1 eq.) was then added, and the mixture was heated at 60 °C for 2 h. Silica (100 mg) was added to the solution and the mixture was stirred for 10 min. All volatiles were removed *in vacuo* and the crude mixture was purified by column chromatography:  $\text{Et}_2\text{O}$  elution phase, phosphole oxide **12**, 223 mg, yield: 75%; DCM elution phase, **14**[OTf] 188 mg. Suitable crystals for X-ray diffraction analysis can obtain by layering a DCM solution with  $\text{Et}_2\text{O}$  at room temperature. It was identified as *E*-**14**[OTf].

**Yield:** 64%. **m.p.** 148 °C. **Raman** (100 mW, 50 scans, 298 K,  $[\text{cm}^{-1}]$ ): 2954 (15), 2926 (14), 1638 (48), 1609 (100), 1566 (34), 1385 (32), 1288 (28), 1274 (31), 1245 (26), 1226 (27), 1206 (39), 1189 (38), 1034 (33), 756 (23), 76 (31), 77 (8). **IR** (ATR, 298 K,  $[\text{cm}^{-1}]$ ): 3261 (vw), 3113 (vw), 2952 (vw), 1635 (w), 1608 (w), 1562 (w), 1512 (vw), 1446 (vw), 1385 (vw), 1352 (vw), 1342 (vw), 1322 (w), 1277 (s), 1247 (vs), 1221 (m), 1205 (m), 1160 (s), 1090 (vw), 1070 (vw), 1027 (vs), 999 (vw), 958 (vw), 919 (vw), 896 (vw), 867 (vw), 846 (vw), 821 (w), 755 (w), 697 (vw), 631 (vs), 571 (w), 555 (vw), 516 (m), 483 (vw), 469 (vw), 454 (vw), 437 (vw), 409 (vw).  **$^1\text{H}$  NMR** (500.13 MHz,  $\text{CDCl}_3$ , 300 K, [ppm]):  $\delta$  = 1.80 (2H, m, H9), 1.83 (2H, m, H10), 2.06 (2H, quint,  $^3J_{\text{HH}} = 5.8$  Hz, H13), 2.34 (3H, s, H15), 2.53 (2H, t,  $^3J_{\text{HH}} = 5.0$  Hz, H8), 3.50 (4H, m, H11, H4), 3.54 (2H, t,  $^3J_{\text{HH}} = 6.2$  Hz, H12), 7.03 (1H, s, H3), 7.16 (2H, d,  $^3J_{\text{HH}} = 8.0$  Hz, H5), 7.31 (2H, d,  $^3J_{\text{HH}} = 8.0$  Hz, H6), 9.08 (1H, s, NH).  **$^{13}\text{C}\{^1\text{H}\}$  NMR** (125.76 MHz,  $\text{CDCl}_3$ , 300 K, [ppm]):  $\delta$  = 19.7 (1C, s, C13), 21.3 (1C, s, C15), 25.5 (1C, s, C9), 26.3 (1C, s, C10), 27.9 (1C, s, C8), 38.8 (1C, s, C14), 48.1 (1C, s, C12), 53.7 (1C, s, C11), 120.6 (1C, q,  $^1J_{\text{CF}} = 320$  Hz, OTf), 129.3 (2C, s, C5), 129.4 (2C, s, C6), 130.0 (1C, s, C4), 131.2 (1C, s, C2), 138.8 (1C, s, C3), 139.2 (1C, s, C7), 164.8 (1C, s, C1).  **$^{19}\text{F}\{^1\text{H}\}$  NMR** (470.59 MHz,  $\text{CDCl}_3$ , 300 K, [ppm]):  $\delta$  = -78.3 (s, OTf). **Elemental analysis:** calculated for  $\text{C}_{18}\text{H}_{23}\text{F}_3\text{N}_2\text{O}_3\text{S}$ : C, 53.46; H, 5.73; N, 6.93; S, 7.93; found: C, 53.21; H, 5.332; N, 6.57; S, 7.462.

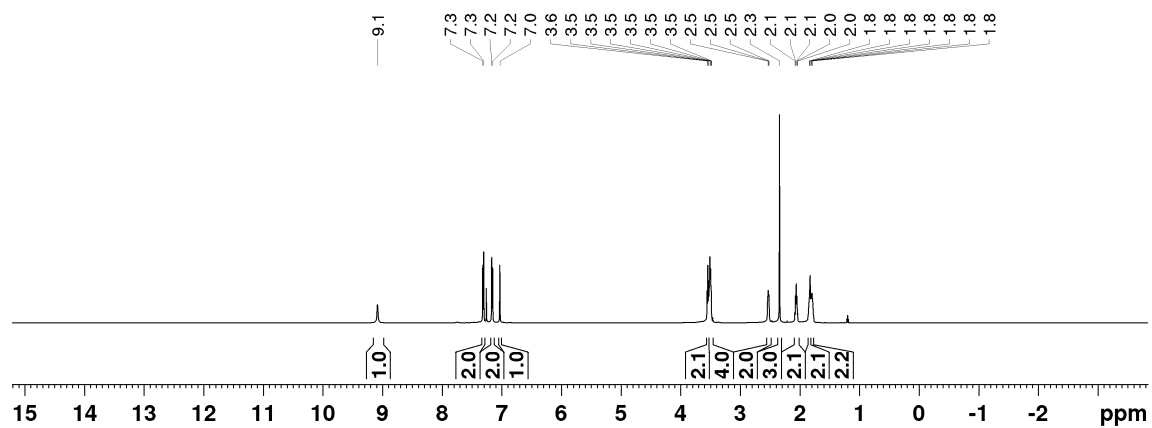

Figure S75.  $^1\text{H}$  NMR spectrum of **14**[OTf] (300 K,  $\text{CDCl}_3$ ).

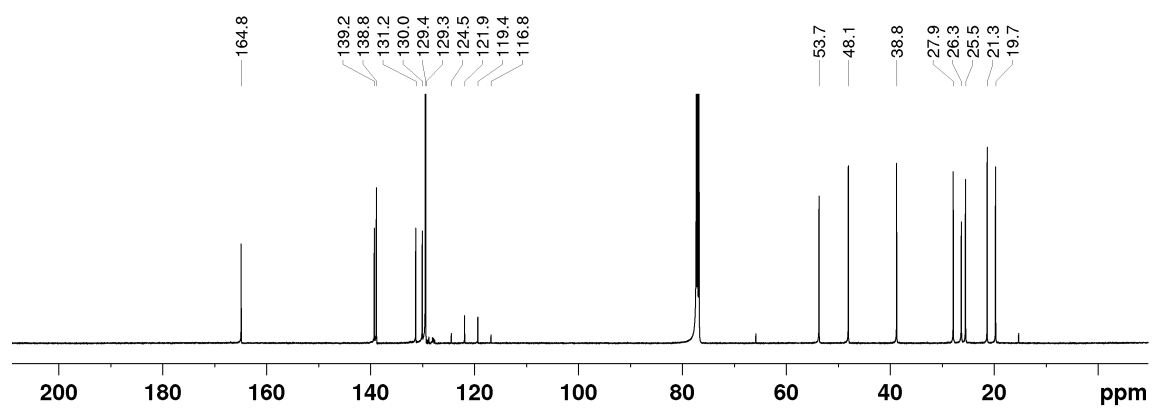

Figure S76.  $^{13}\text{C}\{^1\text{H}\}$  NMR spectrum of **14**[OTf] (300 K,  $\text{CDCl}_3$ ).

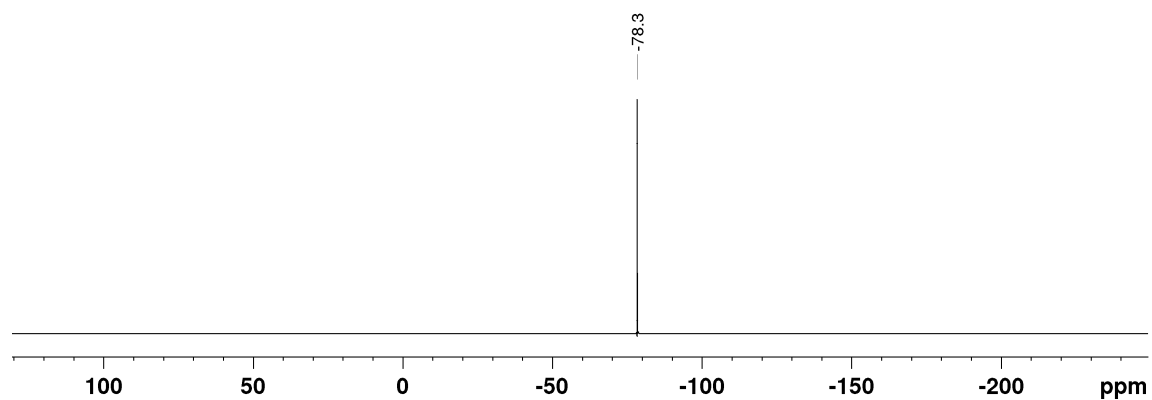

Figure S77.  $^{19}\text{F}\{^1\text{H}\}$  NMR spectrum of **14**[OTf] (300 K,  $\text{CDCl}_3$ ).

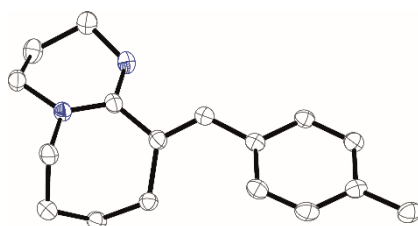

Figure S78. Molecular structure of *E*-**14**<sup>+</sup> in *E*-**14**[OTf]; hydrogen atoms and the anion are omitted for clarity and thermal ellipsoids are displayed at 50% probability (100 K).

## S2.19 Preparation of 15[OTf]

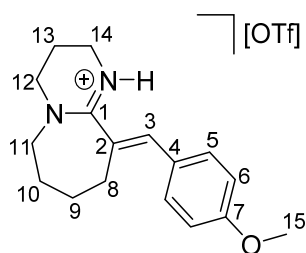

KHMDS (95%) (152 mg, 0.72 mmol, 1 eq.) and **10**[OTf] (500 mg, 0.72 mmol, 1 eq.) were combined in THF (10 mL) in a 50 mL pressured flask and stirred at room temperature for 2 h. 4-Methoxybenzaldehyde (98 mg, 1 equiv.) was then added, and the mixture was heated at 60 °C for 2 h. Silica (100 mg) was added to the solution and the mixture was stirred for 10 min. All volatiles were removed *in vacuo* and the crude mixture was purified by column chromatography: Et<sub>2</sub>O elution phase, phosphole oxide **12**, 210 mg, yield: 71%; DCM elution phase, **15**[OTf] 223 mg. Suitable crystals for X-ray diffraction analysis can obtain by layering a DCM solution with Et<sub>2</sub>O at room temperature. It was identified as *E*-**15**[OTf].

**Yield:** 76%. **m.p.** 130 °C. **Raman** (100 mW, 50 scans, 298 K, [cm<sup>-1</sup>]): 3006 (6), 2982 (11), 2953 (14), 2919 (17), 2881 (9), 2845 (6), 1644 (81), 1621 (100), 1608 (84), 1574 (43), 1449 (10), 1423 (8), 1380 (10), 1279 (20), 1248 (25), 1215 (46), 1184 (40), 1168 (6), 1034 (26), 922 (14), 823 (6), 810 (14), 758 (14), 716 (14), 633 (7), 617 (6), 459 (9), 428 (9), 349 (9), 316 (7), 259 (8), 186 (6), 165 (12), 148 (14), 87 (54), 252 (6), 149 (10), 77 (23). **IR** (ATR, 298 K, [cm<sup>-1</sup>]): 3266 (vw), 2917 (vw), 1640 (w), 1617 (w), 1607 (w), 1573 (w), 1513 (w), 1461 (vw), 1448 (vw), 1378 (vw), 1325 (vw), 1281 (s), 1246 (vs), 1217 (m), 1182 (w), 1157 (s), 1085 (vw), 1029 (vs), 948 (vw), 914 (vw), 896 (vw), 868 (vw), 840 (w), 821 (vw), 808 (vw), 756 (vw), 720677 (vw), 637 (s), 573 (w), 535 (w), 517 (m), 455 (vw). **<sup>1</sup>H NMR** (400.13 MHz, CD<sub>2</sub>Cl<sub>2</sub>, 300 K, in ppm): δ = 1.82 (2H, m, H13), 1.89 (2H, m, H11), 2.08 (2H, m, H10), 2.59 (2H, t, H9), 3.53 (6H, m, H15,H14,H12), 3.82 (3H, s, H8), 6.94 (2H, d, <sup>3</sup>J<sub>HH</sub> = 8.4 Hz, H6), 7.00 (1H, s, H3), 7.44 (2H, d, <sup>3</sup>J<sub>HH</sub> = 8.5 Hz, H5), 8.96 (1H, s, NH). **<sup>13</sup>C{<sup>1</sup>H} NMR** (100.61 MHz, CD<sub>2</sub>Cl<sub>2</sub>, 300 K, in ppm): δ = 19.8 (1C, s, C9), 25.4 (1C, s, C12), 25.8 (1C, s, C10), 27.9 (1C, s, C8), 38.8 (1C, s, C11), 48.0 (1C, s, C14), 55.3 (1C, s, C15), 114.0 (1C, s, C5), 122.3 (1C, q, <sup>1</sup>J<sub>CF</sub> = 320 Hz, OTf), 126.7 (1C, s, C4), 128.6 (1C, s, C2), 131.3 (1C, s, C6), 138.1 (1C, s, C3), 160.4 (1C, s, C7), 164.9 (1C, s, C1). **<sup>19</sup>F{<sup>1</sup>H} NMR** (376.5 MHz, CD<sub>2</sub>Cl<sub>2</sub>, 300 K, in ppm): δ = -78.9 (s, OTf). **Elemental analysis:** calculated for C<sub>18</sub>H<sub>23</sub>F<sub>3</sub>N<sub>2</sub>O<sub>4</sub>S: C, 51.42; H, 5.51; N, 6.66; S, 7.63; found: C, 51.57; H, 5.126; N, 6.65; S, 8.052.

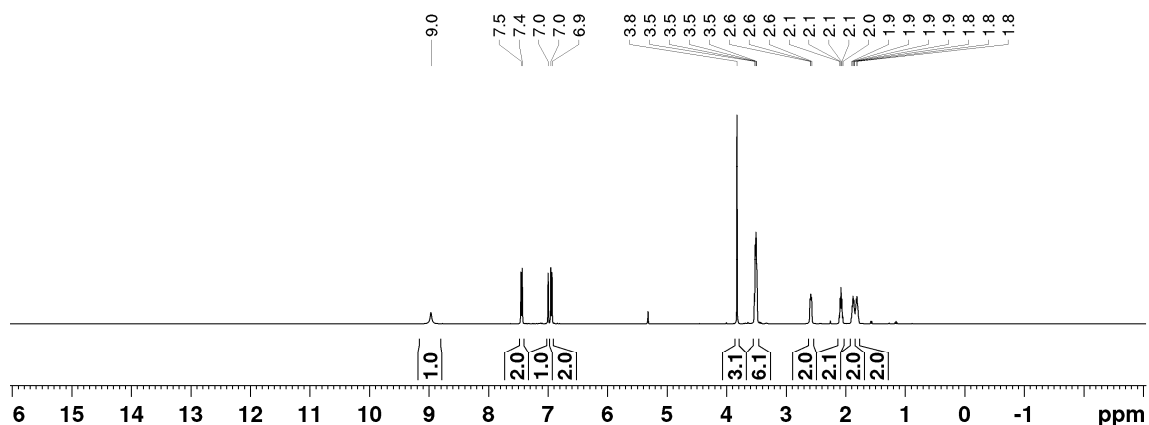

Figure S79. <sup>1</sup>H NMR spectrum of **15**[OTf] (300 K, CDCl<sub>3</sub>).

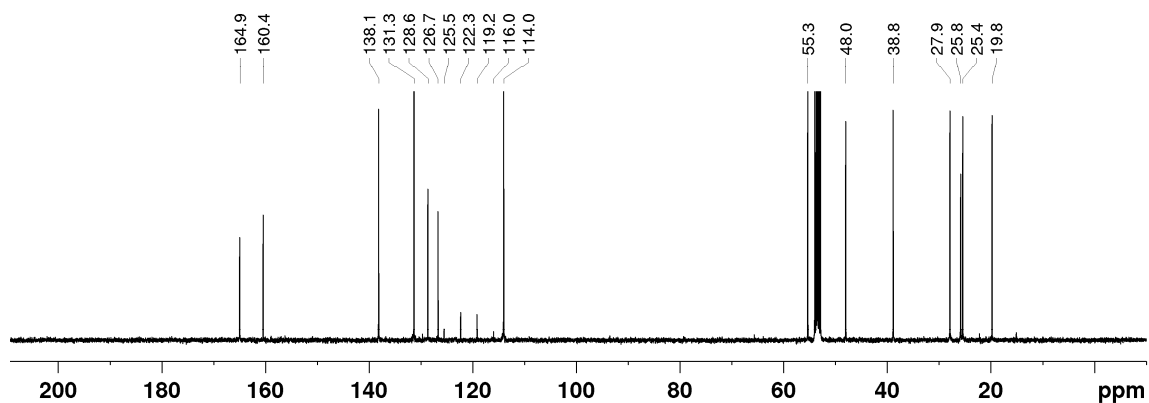

**Figure S80.**  $^{13}\text{C}\{^1\text{H}\}$  NMR spectrum of **15**[OTf] (300 K,  $\text{CDCl}_3$ ).

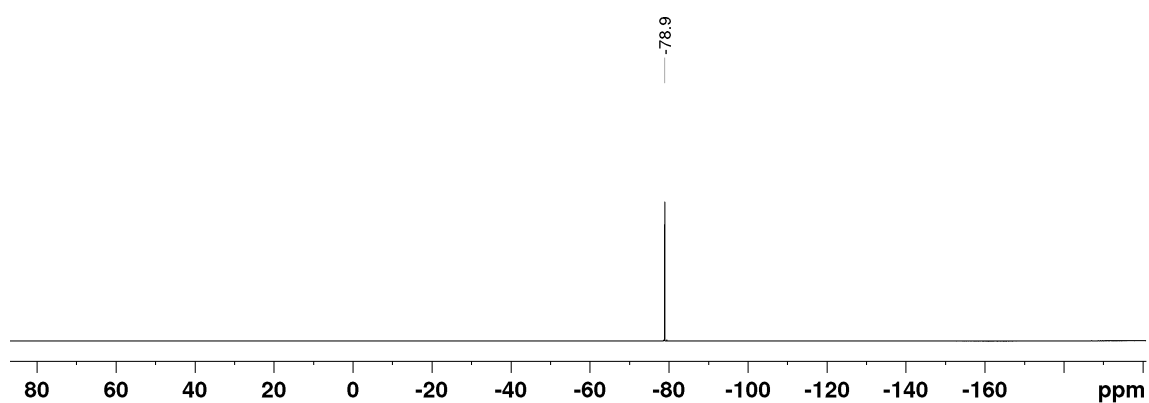

**Figure S81.**  $^{19}\text{F}\{^1\text{H}\}$  NMR spectrum of **15**[OTf] (300 K,  $\text{CDCl}_3$ ).

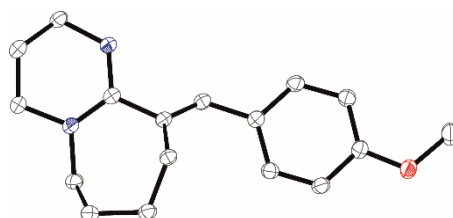

**Figure S82.** Molecular structure of *E*-**15**<sup>+</sup> in *E*-**15**[OTf]; hydrogen atoms and the anion are omitted for clarity and thermal ellipsoids are displayed at 50% probability (100 K).

## S2.20 Preparation of **16**[OTf]

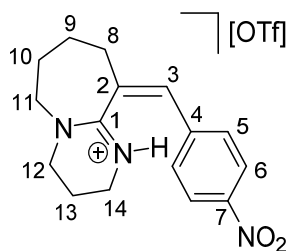

KHMDS (95%) (152 mg, 0.72 mmol, 1 eq.) and **10**[OTf] (500 mg, 0.72 mmol, 1 eq.) were combined in THF (10 mL) in a 50 mL pressured flask and stirred at room temperature for 2 h. 4-Nitrobenzaldehyde (109 mg, 0.72 mmol, 1 eq.) was then added, and the mixture was heated at 60°C for 2 h. Silica (100 mg) was added to the solution and the mixture was stirred for 10

min. All volatiles were removed *in vacuo* and the crude mixture was purified by column chromatography: Et<sub>2</sub>O elution phase, phosphole oxide **12**, 243 mg, yield: 83%; DCM elution phase, **16**[OTf] 189 mg. Suitable crystals for X-ray diffraction analysis can obtain by layering a DCM solution with Et<sub>2</sub>O at room temperature. It was identified as Z-**16**[OTf].

**Yield:** 60%. **m.p.** 148 °C. **Raman** (100 mW, 50 scans, 298 K, [cm<sup>-1</sup>]): 3077 (8), 2966 (8), 2925 (10), 1655 (30), 1633 (34), 1595 (61), 1461 (6), 1344 (100), 1211 (13), 1108 (25), 1039 (16), 999 (6), 911 (6), 870 (7), 758 (9), 719 (9), 349 (8), 315 (9), 174 (8), 135 (22), 83 (66). **IR** (ATR, 298 K, [cm<sup>-1</sup>]): 3251 (vw), 3139 (vw), 2927 (vw), 1653 (w), 1631 (w), 1588 (w), 1519 (w), 1509 (w), 1492 (vw), 1448 (vw), 1401 (vw), 1384 (vw), 1349 (w), 1322 (w), 1282 (m), 1247 (vs), 1223 (m), 1143 (s), 1106 (vw), 1087 (vw), 1030 (s), 995 (vw), 950 (vw), 910 (vw), 897 (vw), 869 (vw), 852 (w), 822 (vw), 788 (vw), 754 (w), 700 (w), 670 (vw), 637 (vs), 572 (w), 555 (w), 515 (m), 494 (w), 467 (vw), 433 (vw), 415 (vw). **<sup>1</sup>H NMR** (500.13 MHz, CD<sub>2</sub>Cl<sub>2</sub>, 300 K, in ppm): δ = 1.87 (2H, m, H11), 1.94 (2H, m, H8), 2.17 (2H, m, H13), 2.58 (2H, m, H9), 3.62 (6H, m, H10, H14, H12), 7.20 (1H, s, H3), 7.69 (2H, d, <sup>3</sup>J<sub>HH</sub> = 8.6 Hz, H5), 8.28 (2H, d, <sup>3</sup>J<sub>HH</sub> = 8.6 Hz, H6), 9.40 (1H, s, NH). **<sup>13</sup>C{<sup>1</sup>H} NMR** (125.76 MHz, CD<sub>2</sub>Cl<sub>2</sub>, 300 K, in ppm) : δ = 19.5 (1C, s, C13), 25.5 (1C, s, C11), 26.8 (1C, s, C8), 28.9 (1C, s, C9), 38.8 (1C, s, C12), 48.2 (1C, s, C10), 53.0 (1C, s, C14), 121.9 (1C, q, <sup>1</sup>J<sub>CF</sub> = 320 Hz, OTf), 123.6 (1C, s, C6), 130.1 (1C, s, C5), 134.5 (1C, s, C2), 136.5 (1C, s, C3), 140.6 (1C, s, C4), 147.6 (1C, s, C7), 164.1 (1C, s, C1). **<sup>19</sup>F{<sup>1</sup>H} NMR** (470.59 MHz, CD<sub>2</sub>Cl<sub>2</sub>, 300 K, in ppm): δ = -79.0 (s, OTf). **Elemental analysis:** calculated for C<sub>17</sub>H<sub>20</sub>F<sub>3</sub>N<sub>3</sub>O<sub>5</sub>S·0.1 KOTf: C, 45.22; H, 4.44; N, 9.25; S, 7.36; found: C, 45.25; H, 4.261; N, 8.88; S, 7.418.

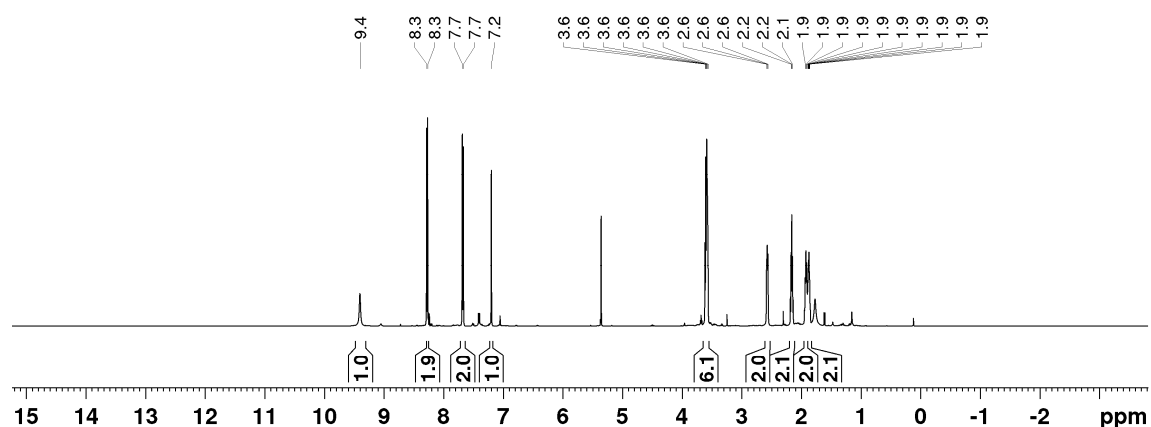

**Figure S83.** <sup>1</sup>H NMR spectrum of **16**[OTf] (300 K, CD<sub>2</sub>Cl<sub>2</sub>).

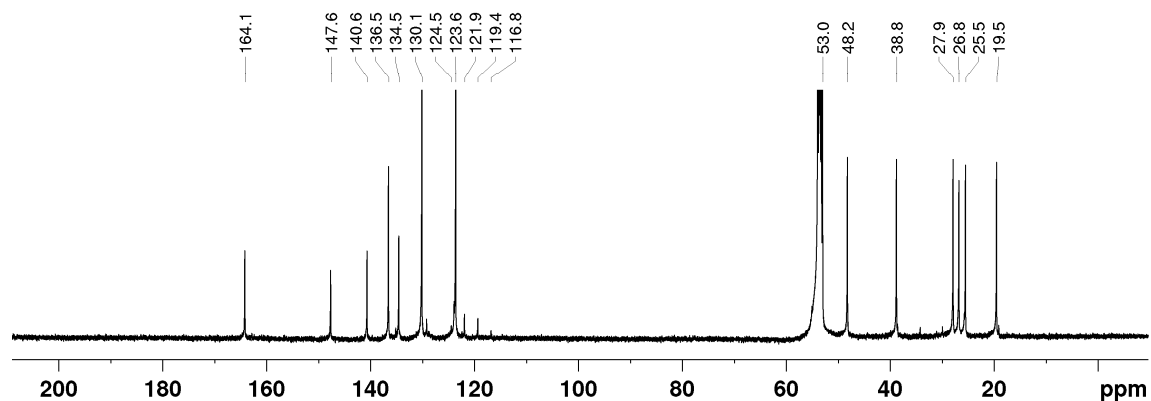

**Figure S84.** <sup>13</sup>C{<sup>1</sup>H} NMR spectrum of **16**[OTf] (300 K, CD<sub>2</sub>Cl<sub>2</sub>).

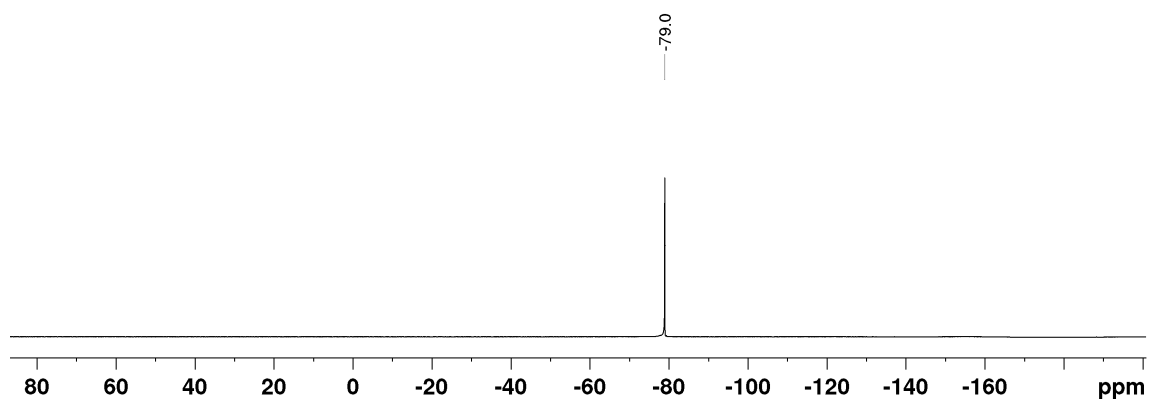

**Figure S85.**  $^{19}\text{F}\{^1\text{H}\}$  NMR spectrum of **16**[OTf] (300 K,  $\text{CD}_2\text{Cl}_2$ ).

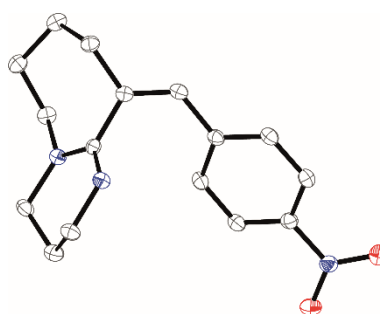

**Figure S86.** Molecular structure of **Z-16<sup>+</sup>** in **Z-16**[OTf]; hydrogen atoms and the anion are omitted for clarity and thermal ellipsoids are displayed at 50% probability (100 K).

## S2.21 Preparation of **17**[OTf]

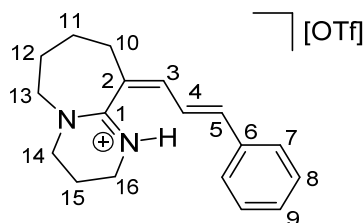

KHMDS (95%) (152 mg, 0.72 mmol, 1 eq.) and **10**[OTf] (500 mg, 0.72 mmol, 1 eq.) were combined in THF (10 mL) in a 50 mL pressured flask and stirred at room temperature for 2 h. *E*-cinnamaldehyde (95 mg, 0.72 mmol, 1 eq.) was then added, and the mixture was heated at 60°C for 2 h. Silica (100 mg) was added to the solution and the mixture was stirred for 10 min. All volatiles were removed *in vacuo* and the crude mixture was purified by column chromatography:  $\text{Et}_2\text{O}$  elution phase, phosphole oxide **12**, 231 mg, yield: 78%; DCM elution phase, **17**[OTf] 189 mg. Suitable crystals for X-ray diffraction analysis can obtain by layering a DCM solution with  $\text{Et}_2\text{O}$  at room temperature. It was identified as *Z*, *E*-**17**[OTf].

**Yield:** 63%. **m.p.** 127 °C. **Raman** (100 mW, 50 scans, 298 K,  $[\text{cm}^{-1}]$ ): 2939 (5), 1624 (100), 1596 (78), 1570 (11), 1492 (7), 1449 (6), 1381 (7), 1365 (7), 1318 (15), 1289 (14), 1259 (9), 1206 (6), 1161 (32), 1131 (7), 1032 (8), 1000 (23), 233 (6), 74 (16). **IR** (ATR, 298 K,  $[\text{cm}^{-1}]$ ): 3279 (vw), 3120 (vw), 2936 (vw), 2866 (vw), 1634 (m), 1606 (w), 1563 (w), 1491 (vw), 1448 (vw), 1379 (vw), 1345 (vw), 1320 (w), 1280 (m), 1252 (vs), 1221 (m), 1204 (m), 1152 (vs), 1079 (vw), 1030 (vs), 990 (vw), 965 (m), 947 (vw), 893 (vw), 843 (vw), 761 (m), 720 (vw), 693 (m), 634 (vs), 590 (vw), 571 (w), 542 (vw), 515 (m), 474 (vw), 455 (vw), 416 (vw), 492 (vw), 463 (vw), 407 (vw).  **$^1\text{H}$  NMR** (400.13 MHz,  $\text{CD}_2\text{Cl}_2$ , 300 K, [ppm]):  $\delta$  = 1.82 (4H, m, H11, H14),

2.09 (2H, m, H15), 2.62 (2H, m, H10), 3.48 (2H, m, H16), 3.52 (4H, m, H13), 6.85 (1H, m, H3), 7.05 (2H, m, H7), 7.43 (3H, m, H9,H4,H5), 7.56 (2H, m, H8), 8.84 (1H, s, NH).  **$^{13}\text{C}\{^1\text{H}\}$  NMR** (100.61 MHz,  $\text{CD}_2\text{Cl}_2$ , 300 K, [ppm]):  $\delta$  = 19.8 (1C, s, C15), 25.1 (1C, s, C13), 25.2 (1C, s, C11), 26.9 (1C, s, C10), 38.9 (1C, s, C14), 48.0 (1C, s, C12), 53.4 (1C, s, C16), 121.4 (2C, s, C7), 122.3 (1C, q,  $^1J_{\text{CF}} = 321$  Hz, OTf), 127.3 (2C, s, C8), 128.8 (1C, s, C9), 129.1 (1C, s, C4), 129.2 (1C, s, C2), 136.2 (1C, s, C6), 137.9 (1C, s, C3), 141.0 (1C, s, C5), 164.3 (1C, s, C1).  **$^{19}\text{F}\{^1\text{H}\}$  NMR** (376.5 MHz,  $\text{CD}_2\text{Cl}_2$ , 300 K, [ppm]):  $\delta$  = -78.9 (s, OTf). **Elemental analysis:** calculated for  $\text{C}_{19}\text{H}_{23}\text{F}_3\text{N}_2\text{O}_3\text{S}$ : C, 54.80; H, 5.57; N, 6.73; S, 7.70; found: C, 54.56; H, 5.131; N, 6.51; S, 8.181.

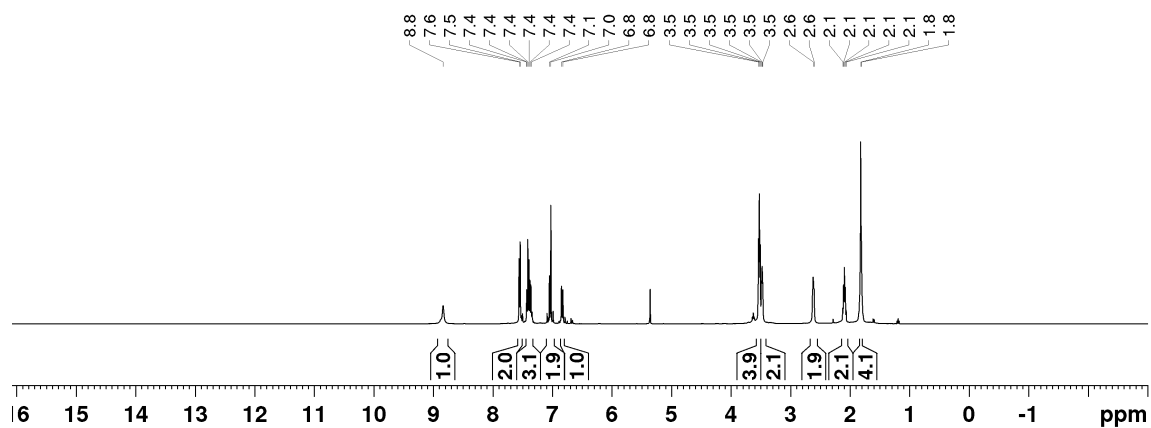

Figure S87.  $^1\text{H}$  NMR spectrum of **17**[OTf] (300 K,  $\text{CD}_2\text{Cl}_2$ ).

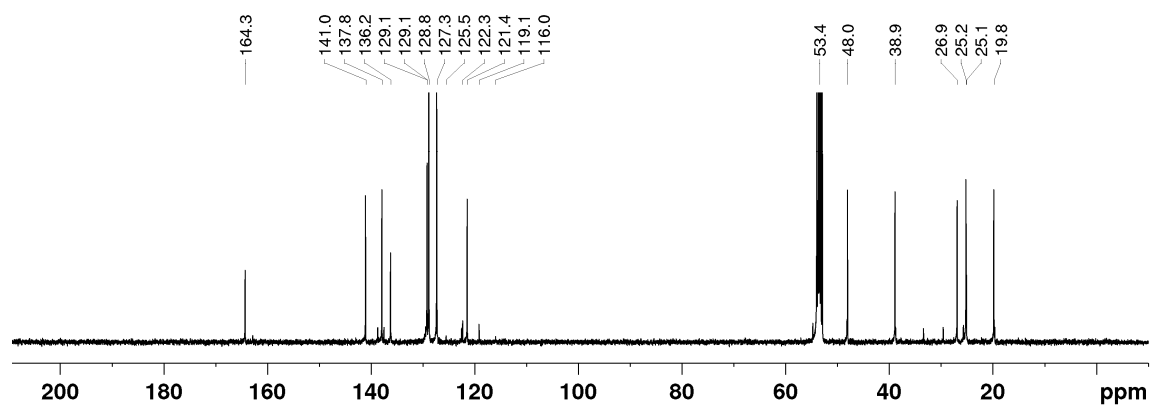

Figure S88.  $^{13}\text{C}\{^1\text{H}\}$  NMR spectrum of **17**[OTf] (300 K,  $\text{CD}_2\text{Cl}_2$ ).

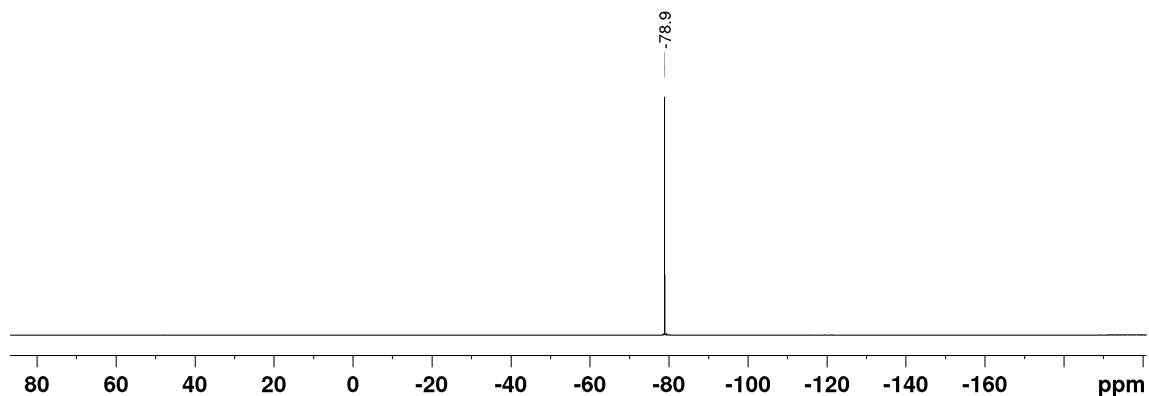

**Figure S89.**  $^{19}\text{F}$  NMR spectrum of **17**[OTf] (300 K,  $\text{CD}_2\text{Cl}_2$ ).

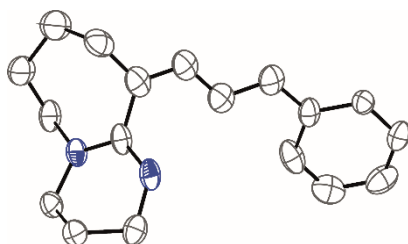

**Figure S90.** Molecular structure of *Z,E*-**17**<sup>+</sup> in *Z,E*-**17**[OTf]; hydrogen atoms and the anion are omitted for clarity and thermal ellipsoids are displayed at 50% probability (100 K).

## S2.22 Preparation of **12**

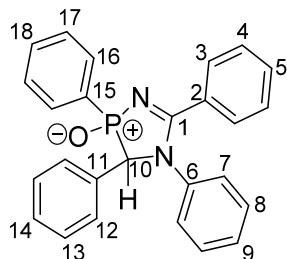

The phosphole oxide **12** was obtained from reactions of **13**[OTf]-**17**[OTf] and was collected in the  $\text{Et}_2\text{O}$  elution phase. The yield was determined for each reaction independently: **13**[OTf], 52%; **14**[OTf], 75%; **15**[OTf], 71%; **16**[OTf], 83%; **17**[OTf], 78%.

**m.p.** 201 °C. **Raman** (100 mW, 50 scans, 298 K,  $[\text{cm}^{-1}]$ ): 3067 (20), 1600 (51), 1580 (22), 1516 (16), 1444 (7), 1351 (11), 1268 (8), 1169 (12), 1034 (25), 999 (57), 949 (9), 826 (10), 773 (15), 677 (12), 626 (8), 616 (7), 494 (9), 313 (7), 267 (15), 250 (10), 229 (10), 92 (100). **IR** (ATR, 298 K,  $[\text{cm}^{-1}]$ ): 3052 (vw), 1601 (vw), 1585 (vw), 1519 (w), 1486 (w), 1458 (vw), 1436 (vw), 1382 (w), 1338 (vw), 1287 (vw), 1262 (vw), 1214 (w), 1180 (vw), 1134 (vw), 1118 (w), 1077 (vw), 1027 (vw), 1018 (vw), 1000 (vw), 947 (vw), 930 (vw), 856 (w), 785 (vw), 775 (vw), 767 (vw), 748 (vw), 734 (w), 714 (w), 691 (s), 662 (vw), 635 (vw), 618 (vw), 590 (vw), 578 (w), 515 (w), 480 (w), 467 (w), 449 (vw), 635 (vs), 590 (w), 572 (m), 539 (vw), 516 (s), 490 (s), 468 (w), 449 (vw).  **$^1\text{H}$  NMR** (500.13 MHz,  $\text{CD}_2\text{Cl}_2$ , 300 K, in ppm):  $\delta$  = 5.17 (1H, d,  $^2J_{\text{HP}}$  = 17.0 Hz, H10), 6.97 (2H, m, Ar-H), 7.11 (4H, m, Ar-H), 7.14 (3H, m, Ar-H), 7.19 (2H, m, Ar-H), 7.32 (2H, m, Ar-H), 7.38 (2H, m, Ar-H), 7.49 (4H, m, Ar-H), 7.78 (2H, d,  $^3J_{\text{HH}}$  = 7.4 Hz, H3).  **$^{13}\text{C}\{^1\text{H}\}$  NMR** (125,76 MHz,  $\text{CD}_2\text{Cl}_2$ , 300 K, in ppm) : **major** :  $\delta$  = 70.8 (1C, d,  $^1J_{\text{CP}}$  = 63 Hz, C10), 126.0 (2C, s, C13), 126.5 (1C, d,  $^3J_{\text{CP}}$  = 4 Hz, C12), 127.1 (2C, s, C4), 127.3 (1C, d,  $^3J_{\text{CP}}$  = 3 Hz, C17), 127.7 (1C, d,  $^1J_{\text{CP}}$  = 13 Hz, C15), 127.9 (1C, s, C14), 128.6 (2C, d,  $^3J_{\text{CP}}$  = 2 Hz, C6), 129.0 (2C,

s, C8), 129.2 (2C, s, C3), 130.3 (1C, s, C5), 131.6 (1C, s, C18), 131.9 (1C, d,  $^3J_{CP} = 3$  Hz, C6), 132.5 (2C, d,  $^2J_{CP} = 9$  Hz, C16), 135.6 (2C, s, C7), 142.4 (1C, d,  $^2J_{CP} = 9$  Hz, C11), 173.0 (1C, d,  $^2J_{CP} = 3$  Hz, C1). **minor** :  $\delta = 67.5$  (1C, d,  $^1J_{CP} = 64$  Hz, C10), 126.8 (2C, d,  $^3J_{CP} = 6$  Hz, C12), 128.1 (2C, s, C13), 128.5 (2C, s, C4), 128.8 (1C, d,  $^2J_{CP} = 13$  Hz, C11), 128.9 (2C, d,  $^3J_{CP} = 2$  Hz, C17), 129.0 (2C, s, C14), 130.0 (2C, s, C8), 131.3 (1C, d,  $^1J_{CP} = 24$  Hz, C15), 131.5 (2C, s, C3), 131.8 (1C, s, C5), 131.9 (1C, s, C18), 132.4 (1C, d,  $^3J_{CP} = 3$  Hz, C6), 132.6 (1C, s, C9), 132.7 (1C, d,  $^3J_{CP} = 4$  Hz, C2), 133.7 (2C, s, C7), 140.3 (2C, d,  $^2J_{CP} = 10$  Hz, C11), 171.3 (1C, d,  $^2J_{CP} = 4$  Hz, C1).  **$^{31}\text{P}\{^1\text{H}\}$  NMR** (202.46 MHz,  $\text{CD}_2\text{Cl}_2$ , 300 K, in ppm):  $\delta = 56.5$  (s) (79%), 47.2 (s) (21%).

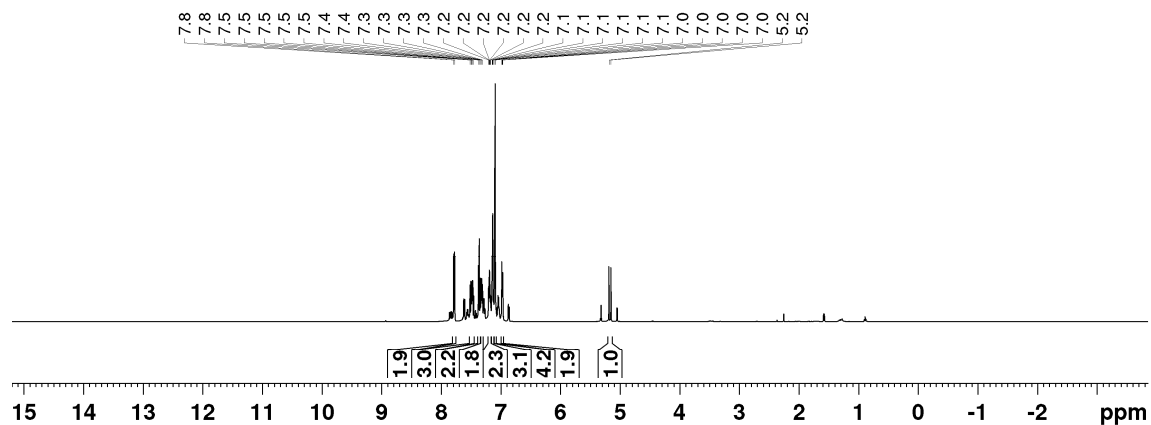

**Figure S91.**  $^1\text{H}$  NMR spectrum of **12** (300 K,  $\text{CD}_2\text{Cl}_2$ ).

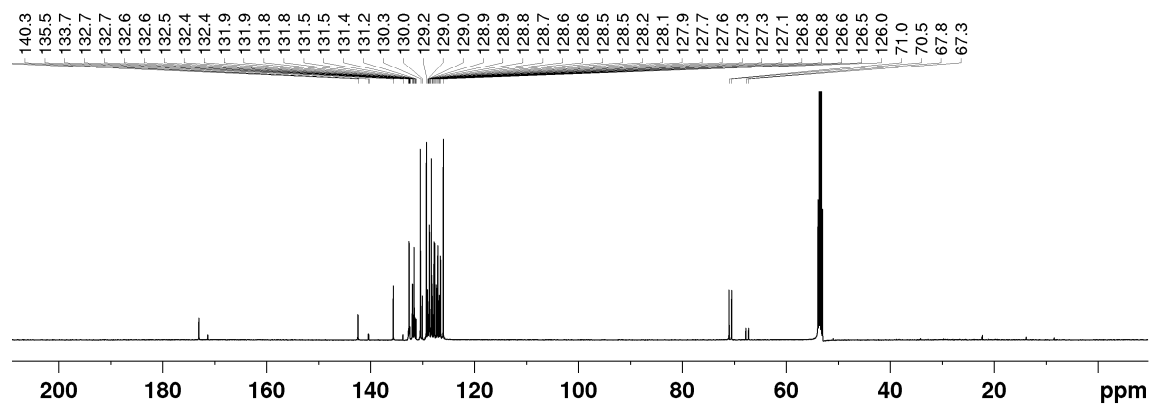

**Figure S92.**  $^{13}\text{C}\{^1\text{H}\}$  NMR spectrum of **12** (300 K,  $\text{CD}_2\text{Cl}_2$ ).

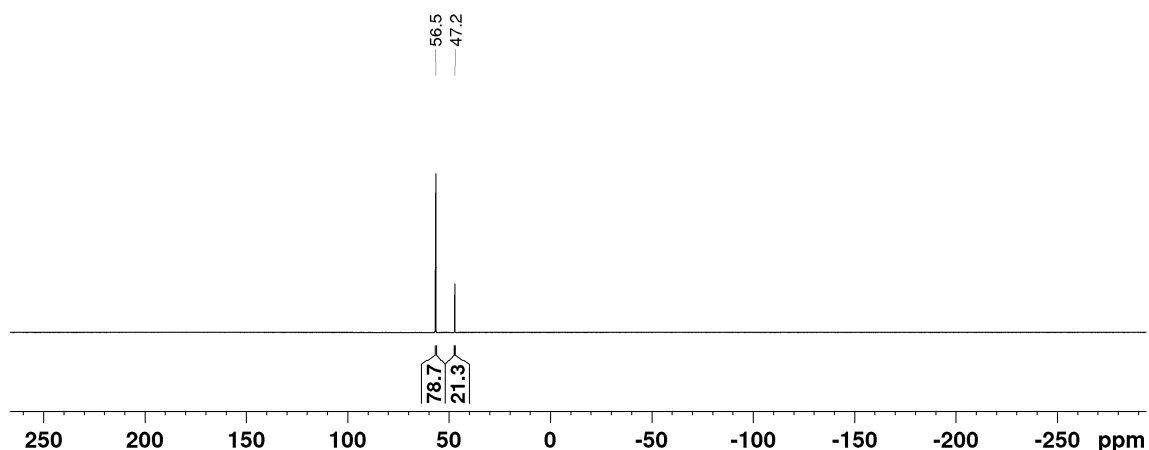

**Figure S93.**  $^{31}\text{P}\{^1\text{H}\}$  NMR spectrum of **12** (300 K,  $\text{CD}_2\text{Cl}_2$ ).

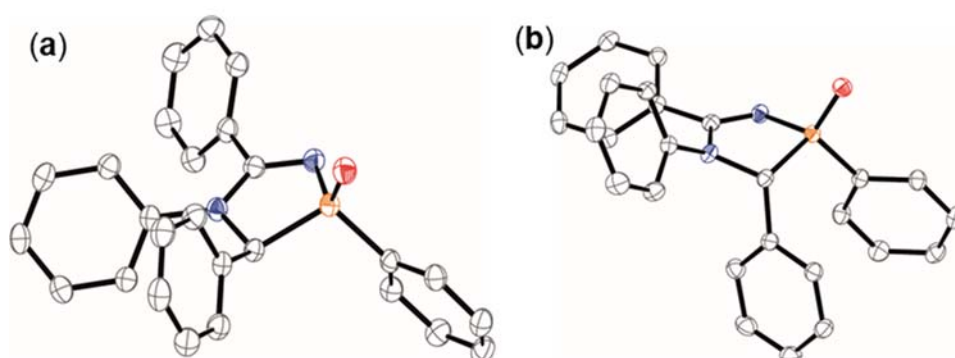

**Figure S94.** Molecular structure of **12**, (a) *syn*-, (b) *anti*-; hydrogen atoms are omitted for clarity and thermal ellipsoids are displayed at 50% probability (100 K).

## S2.23 Preparation of 18

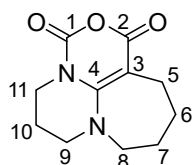

A 10 mL Schlenk tube charged with **11** (200 mg) in THF (5 mL) was connected with a  $\text{CO}_2$  cylinder. After replacing the atmosphere to  $\text{CO}_2$  (1 bar), the deep orange solution was exposed to  $\text{CO}_2$  and then rapidly turned yellow within seconds. The reaction mixture was kept under a  $\text{CO}_2$  atmosphere for 10-30 min until no further color change was observed. Removal of all volatiles resulted in a yellow solid. The crude solid was washed with toluene to isolate **12**, and the residue was recrystallized by slow diffusion of  $\text{Et}_2\text{O}$  to a DCM solution at room temperature to give the white, air and moisture stable solid.

**Yield:** 58 mg, 71%. **m.p.** 163 °C. **Raman** (100 mW, 50 scans, 298 K,  $[\text{cm}^{-1}]$ ): 2989 (63), 2967 (50), 2942 (88), 2924 (100), 2873 (61), 1740 (84), 1681 (64), 1569 (31), 1502 (19), 1479 (31), 1452 (36), 1442 (34), 1327 (22), 1287 (28), 1241 (17), 1200 (19), 1028 (17), 937 (22), 833 (25), 594 (45), 567 (31), 532 (25), 491 (17), 450 (17), 389 (20), 375 (17), 339 (17), 124 (23), 75 (97). **IR** (ATR, 298 K,  $[\text{cm}^{-1}]$ ): 3357 (vw), 2921 (w), 2853 (vw), 1740 (s), 1683 (vs), 1575 (vs), 1502 (s), 1474 (m), 1440 (m), 1404 (m), 1373 (w), 1362 (w), 1324 (m), 1295 (w), 1287 (w), 1274 (w), 1237 (m), 1199 (w), 1187 (vw), 1172 (vw), 1147 (w), 1130 (vw), 1110 (vw), 1094 (vw), 1048 (w), 1024 (w), 999 (vw), 964 (m), 954 (m), 914 (vw), 902 (vw), 886 (vw), 830 (vw),

774 (vw), 753 (m), 740 (vs), 719 (w), 688 (vw), 660 (w), 591 (vw), 566 (vw), 528 (vw), 491 (vw), 475 (s), 448 (vw). **<sup>1</sup>H NMR** (500.13 MHz, CDCl<sub>3</sub>, 300 K, in ppm): δ = 1.90 (m, 2H, H6), 1.94 (m, 2H, H7), 2.12 (m, 2H, H10), 2.64 (m, 2H, H5), 3.37 (m, 2H, H9), 3.57 (m, 2H, H8), 3.90 (m, 2H, H11). **<sup>13</sup>C{<sup>1</sup>H} NMR** (125.76 MHz, CDCl<sub>3</sub>, 300 K, in ppm): δ = 21.7 (1C, s, C10), 22.7 (1C, s, C5), 23.8 (1C, s, C6), 24.6 (1C, s, C7), 41.6 (1C, s, C11), 48.4 (1C, s, C9), 52.1 (1C, s, C8), 82.9 (1C, s, C3), 148.5 (1C, s, C1), 154.2 (1C, s, C4), 160.3 (1C, s, C2). **Elemental analysis:** calculated for C<sub>11</sub>H<sub>14</sub>N<sub>2</sub>O<sub>3</sub> · 0.1 C<sub>4</sub>H<sub>10</sub>O · 0.05 C<sub>7</sub>H<sub>8</sub>: C, 60.24; H, 6.63; N, 11.96; found: C, 60.26; H, 6.43; N, 11.64.

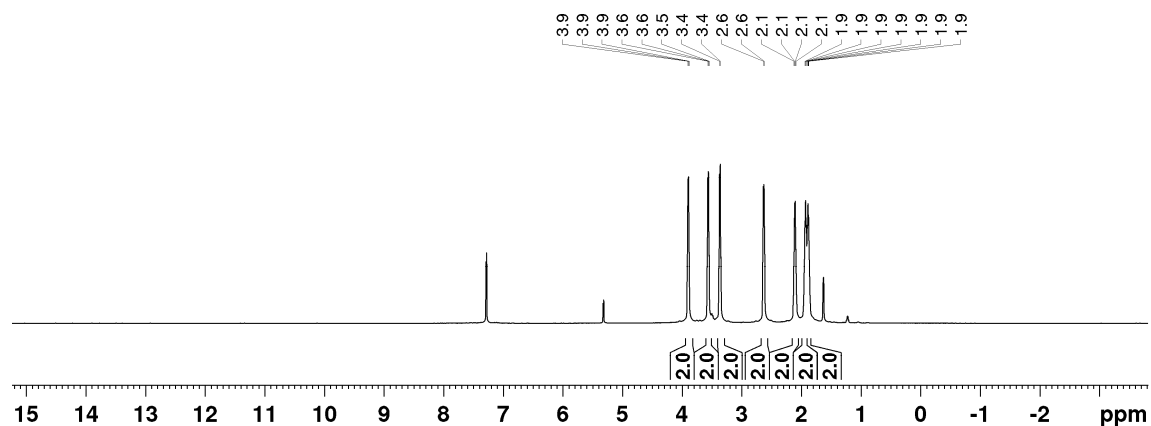

**Figure S95.** <sup>1</sup>H NMR spectrum of **18** (300 K, CDCl<sub>3</sub>).

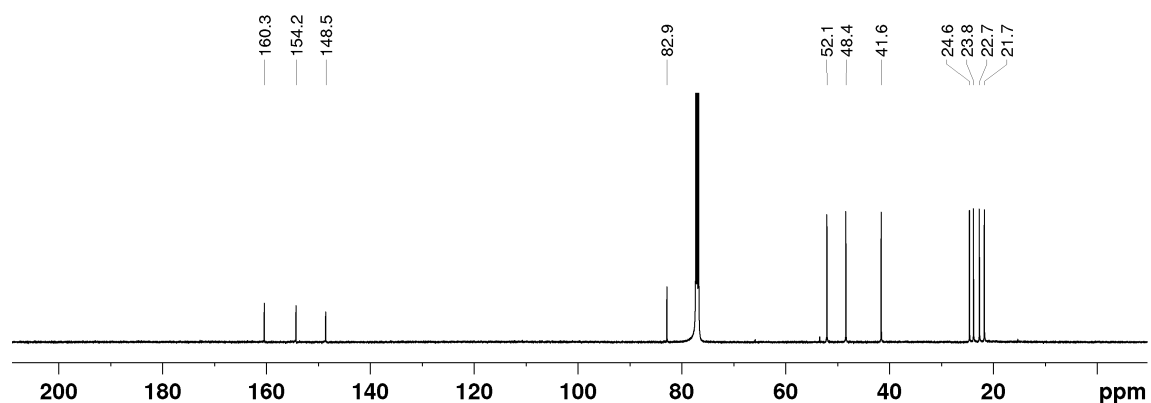

**Figure S96.** <sup>13</sup>C{<sup>1</sup>H} NMR spectrum of **18** (300 K, CD<sub>2</sub>Cl<sub>2</sub>).

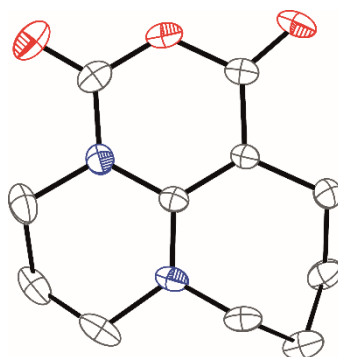

**Figure S97.** Molecular structure of **18**; hydrogen atoms are omitted for clarity and thermal ellipsoids are displayed at 50% probability (100 K).

## S2.24 Preparation of 19

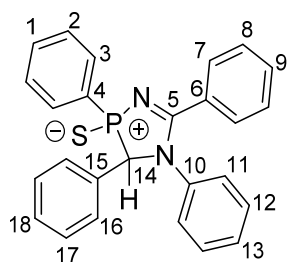

A THF solution of CS<sub>2</sub> (20 mg/mL, 1.4 mL; 28 mg, 0.37 mmol, 2 eq.) was added to a solution of **11** (200 mg, 0.18 mmol, 1 eq.) in THF (4 mL) at room temperature. The mixture was stirred at room temperature for 10 min. Removal of all volatiles resulted in a yellow solid, which was washed with Et<sub>2</sub>O (5 mL) and toluene (5 mL) to remove phosphole sulfide. Combination of filtrates and drying for recrystallization with Et<sub>2</sub>O to obtain **19** as air and moisture stable yellow powder. Suitable crystals for X-ray diffraction analysis were obtained by layering a THF solution with *n*-pentane at room temperature.

**Yield:** 93 mg, 60%. **m.p.** 193 °C. **Raman** (100 mW, 50 scans, 298 K, [cm<sup>-1</sup>]): 3065 (72), 2974 (10), 2873 (16), 1600 (89), 1587 (37), 1515 (43), 1485 (10), 1446 (13), 1380 (16), 1296 (12), 1259 (11), 1221 (24), 1181 (14), 1158 (16), 1108 (14), 1028 (16), 1001 (100), 647 (11), 631 (11), 616 (14), 572 (13), 288 (9), 266 (10), 254 (11), 241 (17), 212 (13), 183 (11), 145 (23), 107 (79), 86 (86). **IR** (ATR, 298 K, [cm<sup>-1</sup>]): 2361 (m), 2341 (w), 1584 (vw), 1512 (s), 1484 (s), 1455 (w), 1446 (w), 1436 (w), 1376 (s), 1338 (w), 1307 (w), 1256 (vw), 1220 (vw), 1127 (vw), 1108 (m), 1077 (w), 1027 (w), 1015 (vw), 998 (vw), 944 (w), 917 (vw), 855 (s), 837 (w), 790 (s), 770 (m), 754 (m), 738 (s), 724 (s), 704 (vs), 692 (vs), 660 (m), 645 (s), 631 (m), 611 (w), 571 (m), 560 (vw), 518 (w), 498 (m), 474 (w), 429 (w). **<sup>1</sup>H NMR** (500.13 MHz, CD<sub>2</sub>Cl<sub>2</sub>, 300 K, in ppm): δ = 6.94 (1H, m, H14), 8.49 (2H, m, H12), 8.74 (3H, m, H13, H17), 8.88 (2H, m, H3), 8.96 (3H, m, Ar-H), 9.01 (2H, m, Ar-H), 9.08 (1H, m, Ar-H), 9.20 (3H, m, Ar-H), 9.27 (2H, m, H7), 9.62 (2H, m, H16). **<sup>13</sup>C{<sup>1</sup>H} NMR** (125.76 MHz, CD<sub>2</sub>Cl<sub>2</sub>, 300 K, in ppm): δ = 73.6 (1C, d, <sup>1</sup>J<sub>CP</sub> = 45 Hz, C14), 128.2 (2C, s, C12), 128.7 (1C, s, C13), 130.0 (2C, d, <sup>4</sup>J<sub>CP</sub> = 2 Hz, C11), 130.0 (1C, s, C18), 130.1 (1C, s, C9), 130.6 (2C, s, C7), 130.7 (2C, s, C17), 130.8 (2C, d, <sup>2</sup>J<sub>CP</sub> = 28 Hz, C3), 131.8 (1C, s, C1), 132.6 (2C, d, <sup>3</sup>J<sub>CP</sub> = 11 Hz, C16), 133.1 (2C, s, C8), 133.4 (1C, d, <sup>2</sup>J<sub>CP</sub> = 19 Hz, C15), 134.0 (2C, d, <sup>3</sup>J<sub>CP</sub> = 3 Hz, C2), 136.2 (1C, d, <sup>3</sup>J<sub>CP</sub> = 4 Hz, C6), 137.5 (1C, d, <sup>1</sup>J<sub>CP</sub> = 96 Hz, C4), 142.8 (1C, d, <sup>3</sup>J<sub>CP</sub> = 10 Hz, C10), 172.2 (1C, d, <sup>2</sup>J<sub>CP</sub> = 8 Hz, C5). **<sup>31</sup>P{<sup>1</sup>H} NMR** (202.46 MHz, CD<sub>2</sub>Cl<sub>2</sub>, 300 K, in ppm): δ = 87.1 (s). **Elemental analysis:** calculated for C<sub>26</sub>H<sub>21</sub>N<sub>2</sub>PS: C, 73.57; H, 4.99; N, 6.60; S, 7.55; found: C, 73.13; H, 5.283; N, 6.41; S, 7.081.

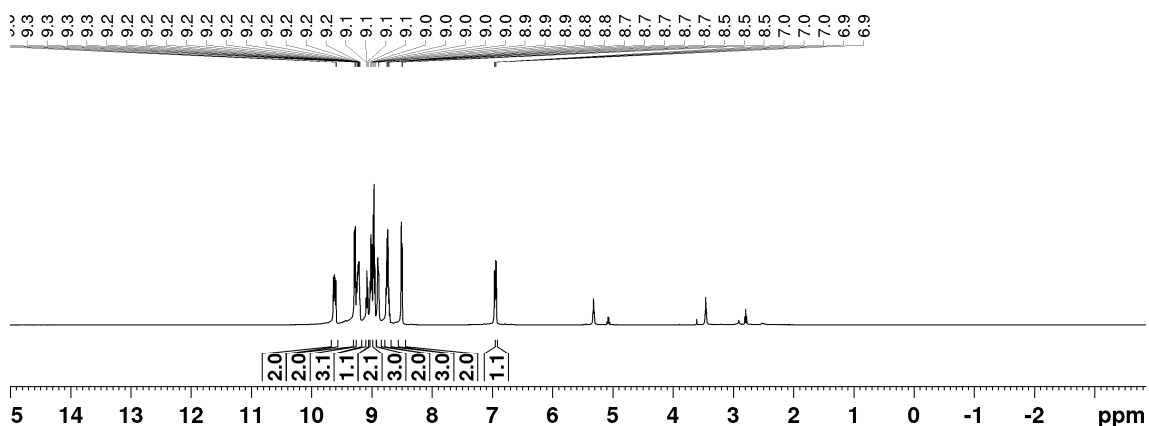

**Figure S98.** <sup>1</sup>H NMR spectrum of **19** (300 K, CD<sub>2</sub>Cl<sub>2</sub>).

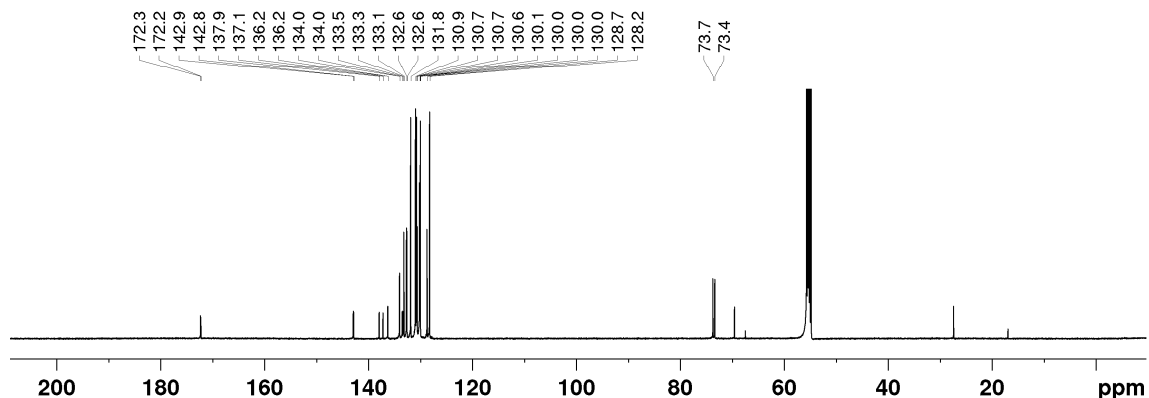

**Figure S99.**  $^{13}\text{C}\{^1\text{H}\}$  NMR spectrum of **19** (300 K,  $\text{CD}_2\text{Cl}_2$ ).

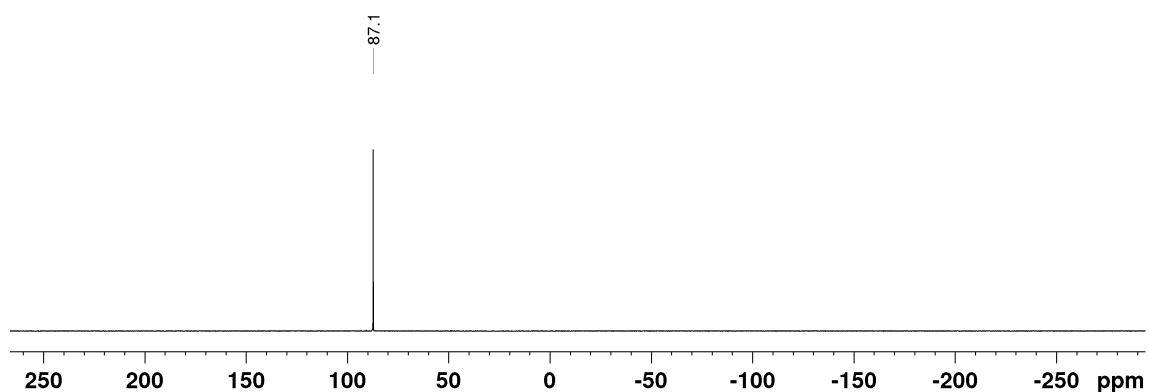

**Figure S100.**  $^{31}\text{P}\{^1\text{H}\}$  NMR spectrum of **19** (300 K,  $\text{CD}_2\text{Cl}_2$ ).

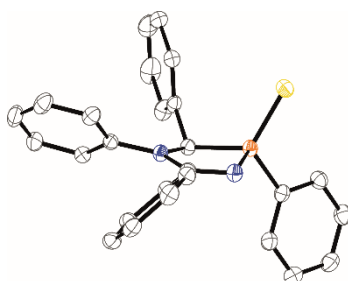

**Figure S101.** Molecular structure of *syn*-**19** in *syn*-**19** · THF; hydrogen atoms are omitted for clarity and thermal ellipsoids are displayed at 50% probability (100 K).

## S2.25 Preparation of **20**

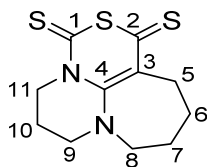

A THF solution of  $\text{CS}_2$  (20 mg/mL, 1.4 mL; 28 mg, 0.37 mmol, 2 eq.) was added to a solution of **11** (200 mg, 0.18 mmol, 1 eq.) in THF (4 mL) at room temperature. The mixture was stirred at room temperature for 10 min. Removal of all volatiles resulted in a yellow solid, which was washed with  $\text{Et}_2\text{O}$  (5 mL) and toluene (5 mL) to remove phosphole sulfide **19**. The remaining powder was obtained as a yellow, air and moisture stable solid. Suitable crystals for X-ray diffraction analysis were obtained by layering a DCM solution with pentane at room temperature.

**Yield:** 52 mg, 52%. **m.p.** 197 °C (decomp.). **Raman** (100 mW, 50 scans, 298 K, [cm<sup>-1</sup>]): No Raman spectrum could be obtained due to fluorescence of the compound. **IR** (ATR, 298 K, [cm<sup>-1</sup>]): 2929 (vw), 2862 (vw), 2002 (vw), 1638 (vw), 1550 (vs), 1447 (m), 1425 (s), 1406 (w), 1375 (vw), 1362 (w), 1337 (vw), 1312 (w), 1289 (vs), 1278 (m), 1252 (s), 1213 (w), 1202 (m), 1171 (w), 1140 (w), 1111 (vw), 1095 (vw), 1082 (w), 1068 (w), 1051 (w), 1017 (m), 991 (m), 978 (w), 956 (vw), 940 (vs), 914 (vw), 900 (w), 823 (w), 804 (vw), 762 (vw), 730 (vw), 694 (s), 638 (vw), 590 (vw), 576 (vw), 556 (vw), 533 (vw), 522 (vw), 464 (vw), 427 (w), 406 (vw). **<sup>1</sup>H NMR** (500.13 MHz, CD<sub>2</sub>Cl<sub>2</sub>, 300 K, in ppm): δ = 4.49 (m, 2H, H11), 3.63 (m, 2H, H8), 3.49 (m, 2H, H9), 3.07 (m, 2H, H5), 2.21 (m, 2H, H10), 1.96 (m, 2H, H7), 1.88 (m, 2H, H6). **<sup>13</sup>C{<sup>1</sup>H} NMR** (125.76 MHz, CD<sub>2</sub>Cl<sub>2</sub>, 300 K, in ppm): δ = 194.1 (1C, s, C2), 193.4 (1C, s, C4), 151.6 (1C, s, C1), 118.7 (1C, s, C3), 53.8 (1C, s, C8), 49.6 (1C, s, C9), 48.9 (1C, s, C11), 29.6 (1C, s, C7), 22.4 (1C, s, C6), 21.6 (1C, s, C5), 21.3 (1C, s, C10). **Elemental analysis:** calculated for C<sub>11</sub>H<sub>14</sub>N<sub>2</sub>S<sub>3</sub> 0.05 KOTf 0.1 C<sub>7</sub>H<sub>8</sub>: C, 48.83; H, 4.88; N, 9.69; S, 33.83; found: C, 48.47; H, 4.88; N, 9.90; S, 33.399.

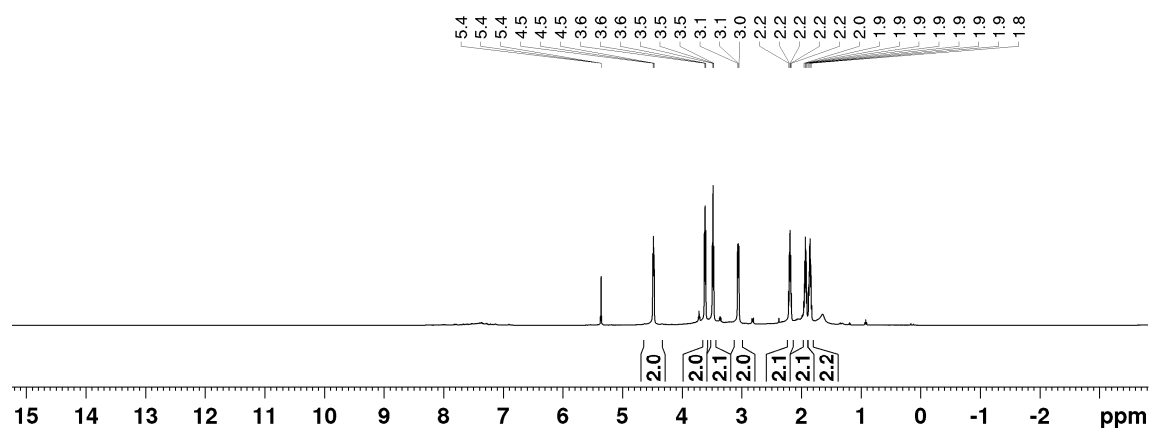

**Figure S102.** <sup>1</sup>H NMR spectrum of **20** (300 K, CD<sub>2</sub>Cl<sub>2</sub>).

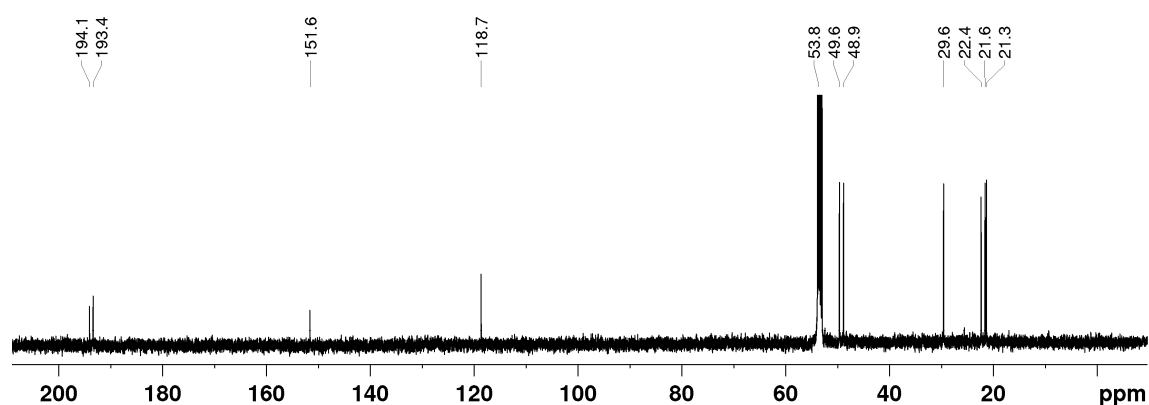

**Figure S103.** <sup>13</sup>C{<sup>1</sup>H} NMR spectrum of **20** (300 K, CD<sub>2</sub>Cl<sub>2</sub>).

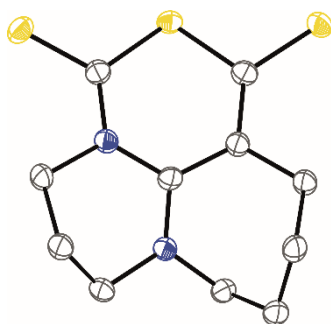

**Figure S104.** Molecular structure of **20**; hydrogen atoms are omitted for clarity and thermal ellipsoids are displayed at 50% probability (100 K).

### S3 The diastereomeric configurations analysis for **3a**[OTf]<sub>2</sub>

The <sup>31</sup>P NMR spectroscopy of **3a**[OTf]<sub>2</sub> revealed two diastereomers with chemical shifts observed at 55.0 ppm (major) and 60.2 ppm (minor). According to literature, *syn*-structure shows larger <sup>2</sup>J<sub>HP</sub> coupling constant between diastereomers.<sup>[2]</sup> Thus, the resonance with a chemical shift of 55.0 ppm and <sup>2</sup>J<sub>HP</sub> (11.1 Hz) is recognized as *syn*-(S<sub>P</sub>, R<sub>C</sub>)-**3a**[OTf]<sub>2</sub> (**Figure S106a**). The minor diastereomer is recognized as *anti*-(S<sub>P</sub>, S<sub>C</sub>) (**Figure S106b**).

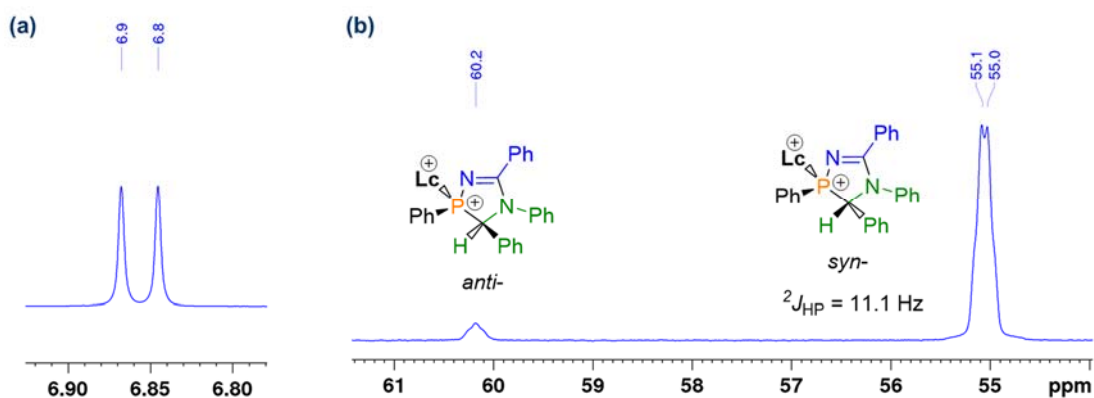

**Figure S105.** (a) The <sup>1</sup>H NMR spectrum of 3° H (C2-H, *syn*-) (6.8-6.9 ppm). (b) The <sup>31</sup>P NMR spectrum of the isolated diastereomeric mixture of **3a**[OTf]<sub>2</sub>.

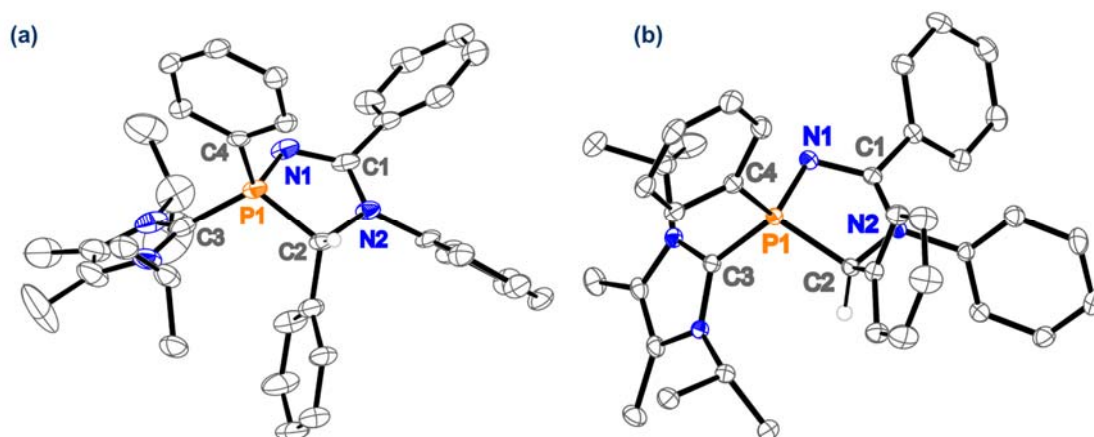

**Figure S106.** Molecular structures of **3a**<sup>2+</sup> in **3a**[OTf]<sub>2</sub>, (a) *syn*-(S<sub>P</sub>, R<sub>C</sub>)-**3a**[OTf]<sub>2</sub>; (b) *anti*-(S<sub>P</sub>, S<sub>C</sub>)-**3a**[OTf]<sub>2</sub>.; hydrogen atoms and anions are omitted for clarity, thermal ellipsoids are displayed at 50% probability (100 K); selected bond lengths (in Å) and angles (in °). (a) P1-N1 1.633(4), P1-C2 1.851(4), P1-C3 1.813(4), P1-C4 1.769(4), C1-N1 1.336(6), C1-N2 1.348(5), N2-C2 1.486(5), N1-P1-C2 97.90(17). (b) P1-N1 1.6312(12), P1-C2 1.8705(14), P1-C3 1.8160(14), P1-C4 1.7682(15), C1-N1 1.3377(19), C1-N2 1.3384(18), N2-C2 1.4845(17), N1-P1-C2 97.28(6).

## S4 Reaction of $3a\text{-c}[\text{OTf}]_2$ with N-bases

### S4.1 Reaction of $3a[\text{OTf}]_2$ with DMAP

DMAP (4.2 mg, 0.034 mmol, 1 eq.) was added to the suspension of  $3a[\text{OTf}]_2$  (30 mg, 0.034 mmol, 1 eq.) in PhF (1 mL) and stirred for 2 h, resulting in a clear yellow solution. Subsequent  $^{31}\text{P}\{\text{H}\}$  NMR analysis of an aliquot removed from the reaction mixture revealed resonances at 112.3 ppm and 98.0 ppm, attributable to intermediate species. However, upon solvent removal only the 1,2-phenyl migration product  $5a[\text{OTf}]$  and  $[\text{Lc-H}][\text{OTf}]$  were obtained. Continued stirring the mixture in THF or PhF for 16 h, leading to  $5a[\text{OTf}]$  precipitated from the solution.

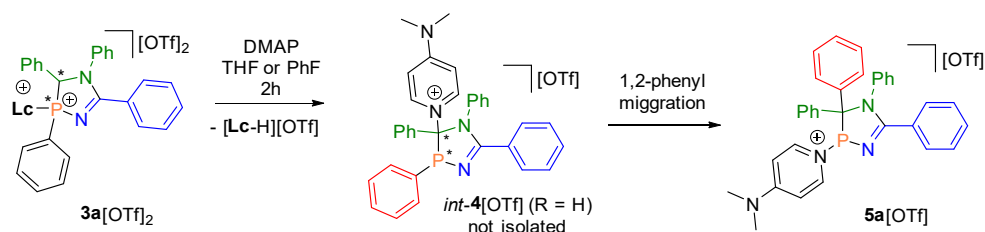

Scheme S1. Reaction of  $3a[\text{OTf}]_2$  with DMAP.

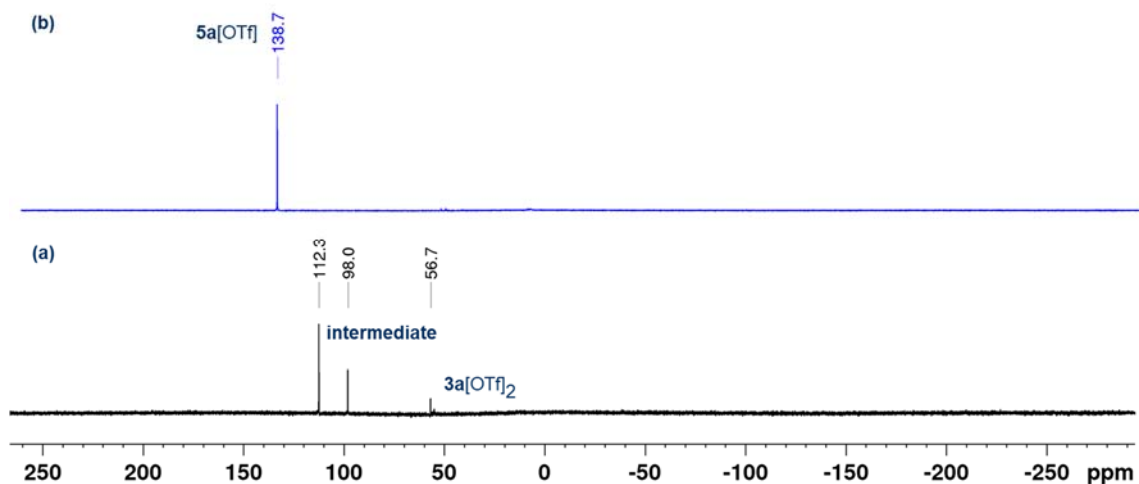

Figure S107.  $^{31}\text{P}\{\text{H}\}$  NMR spectrum of the reaction mixture of  $3a[\text{OTf}]_2$  with 1 eq. DMAP in PhF, ( $\text{C}_6\text{D}_6$  cap., 300 K). (a) 2 h, PhF,  $3a[\text{OTf}]_2$  and intermediates were observed. (b) For 16 h, the suspension dissolved in DCM, only  $5a[\text{OTf}]$  was observed.

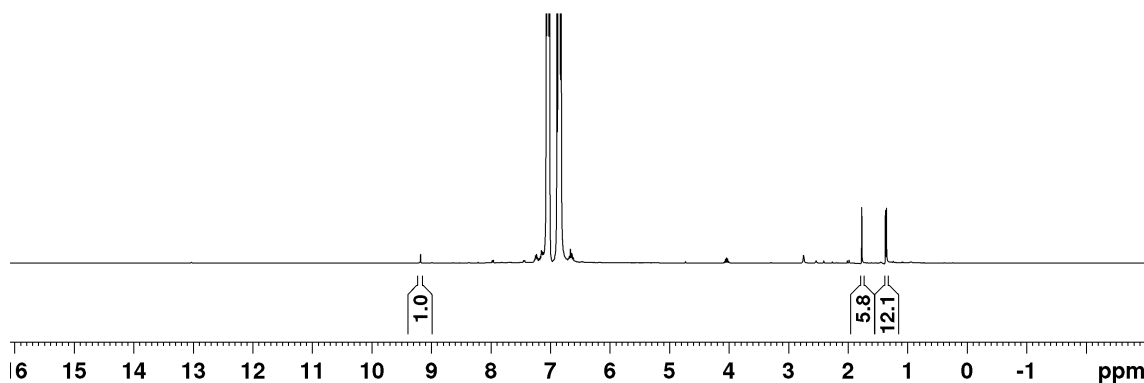

Figure S108.  $^1\text{H}$  NMR spectrum of filtered PhF phase from the reaction of  $3a[\text{OTf}]_2$  with 1 eq. DMAP in PhF for 16 h ( $\text{C}_6\text{D}_6$  cap., 300 K). Integrated resonances correspond to the side product  $[\text{Lc-H}][\text{OTf}]$ .

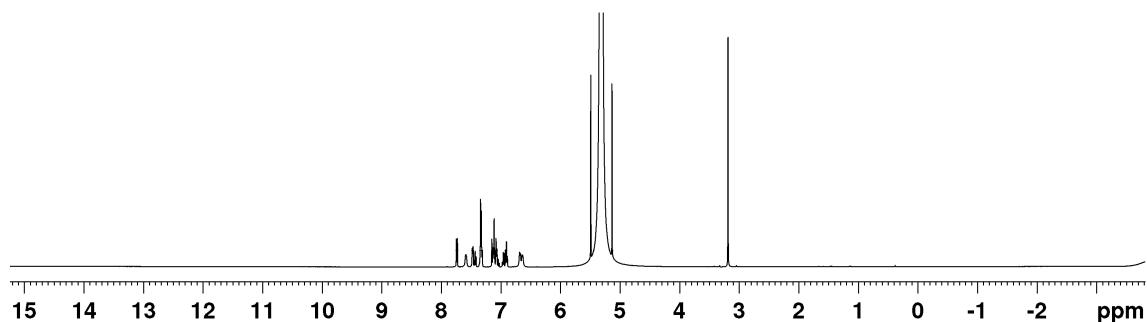

**Figure S109.**  $^1\text{H}$  NMR spectrum of the suspension from the reaction of **3a**[OTf]<sub>2</sub> with 1 eq. DMAP in PhF for 16 h ( $\text{C}_6\text{D}_6$  cap., DCM as solvent, 300 K).

### S4.2 Reaction of **3b**[OTf]<sub>2</sub> with DMAP

DMAP (21 mg, 0.17 mmol, 1 eq.) was added to a suspension of **3b**[OTf]<sub>2</sub> (150 mg, 0.17 mmol, 1 eq.) in PhF (5 mL) and stirred for 2 h, resulting in a clear yellow solution.  $^{31}\text{P}\{\text{NMR}\}$  spectroscopy revealed resonances at 112.8 and 96.3 ppm, assignable to intermediates. Upon extending the reaction 2 days, the solution turned to a yellow suspension. Filtration and collection of the insoluble solid afforded the C-P bond cleavage compound **6**[OTf]<sub>2</sub>, while the filtrate was dried and recrystallized by slow diffusion of Et<sub>2</sub>O to a DCM solution at room temperature to give **5b**[OTf].

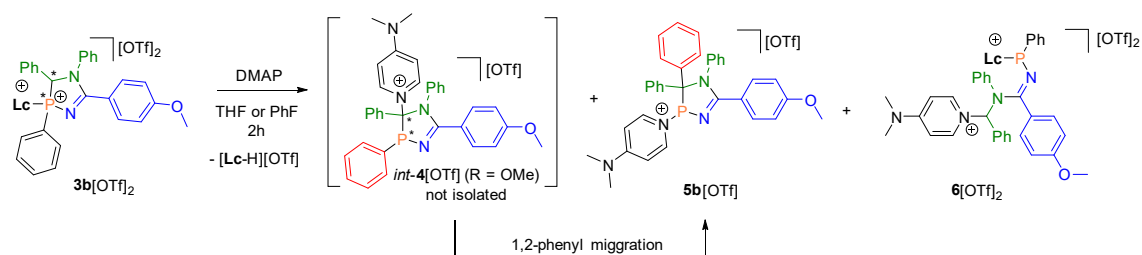

**Scheme S2.** Reaction of **3b**[OTf]<sub>2</sub> with DMAP.

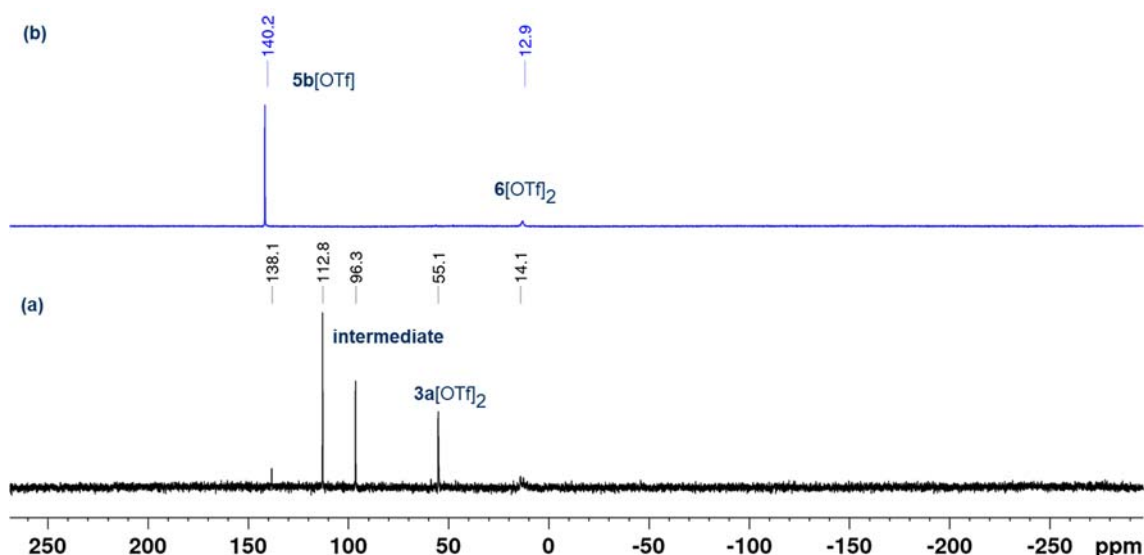

**Figure S110.**  $^{31}\text{P}\{\text{NMR}\}$  spectrum of reaction of **3b**[OTf]<sub>2</sub> with 1 eq. DMAP in PhF, ( $\text{C}_6\text{D}_6$  cap., 300 K). (a) 2 h, **3b**[OTf]<sub>2</sub>, **6**[OTf]<sub>2</sub> and intermediates were observed. (b) For 16 h, the suspension was dissolved in DCM, **5b**[OTf] and **6**[OTf]<sub>2</sub> were observed.

### S4.3 Reaction of **3c**[OTf]<sub>2</sub> with DMAP

DMAP (40 mg, 0.33 mmol, 1 eq.) was added to a suspension of **3c**[OTf]<sub>2</sub> (300 mg, 0.33 mmol, 1 eq.) in PhF (5 mL) and stirred for 16 h, yielding a yellow suspension. The suspension was filtered and the solid was characterized as **4**[OTf]. Dissolving **4**[OTf] in DCM and stirring for 16 h afforded **5c**[OTf], which was isolated in quantitative yield after removal of all volatiles *in vacuo*. Prolonging the reaction in PhF for one week also led to a chemoselective formation of **5c**[OTf].

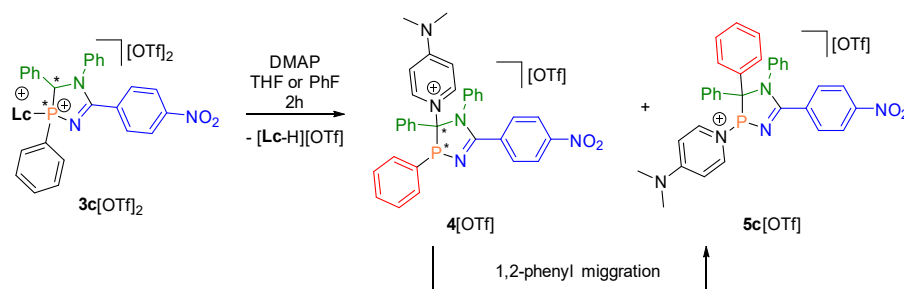

**Scheme S3.** Reaction of **3c**[OTf]<sub>2</sub> with DMAP.

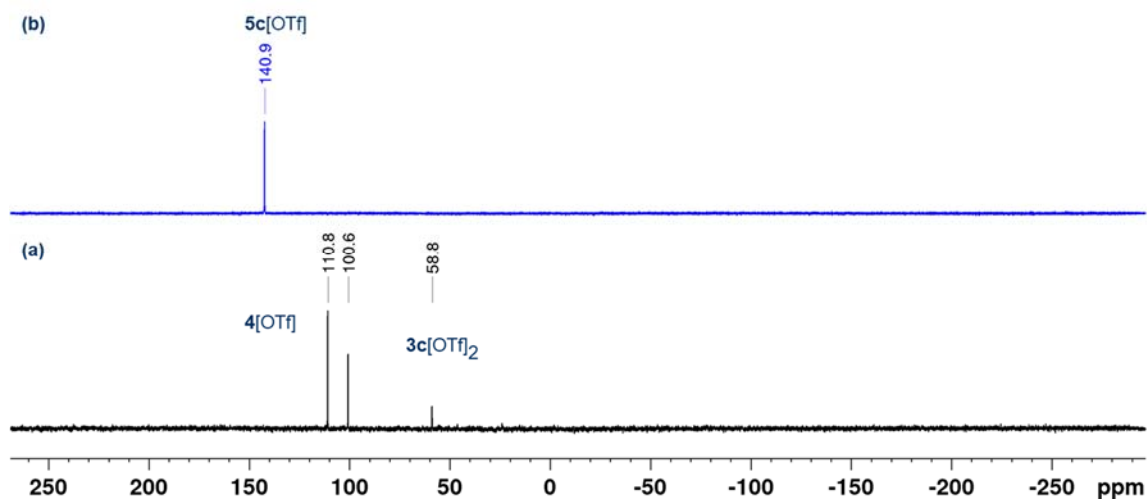

**Figure S111.** <sup>31</sup>P{<sup>1</sup>H} NMR spectrum of reaction of **3c**[OTf]<sub>2</sub> with 1 eq. DMAP in PhF, (C<sub>6</sub>D<sub>6</sub> cap., 300 K). (a) 2 h, **3c**[OTf]<sub>2</sub> and **4**[OTf] were observed. (b) The suspension was dissolved in DCM and stirred for 16 h, and only **5c**[OTf] was observed.

### S4.4 Reaction of **3a**[OTf]<sub>2</sub> with other N-bases

Other neutral nitrogen-based bases, such as DIPEA, Et<sub>3</sub>N, DBN were as screened. No reaction was observed for DIPEA or Et<sub>3</sub>N, whereas DBN leads to a product mixture which were not able to separate or identify. The <sup>31</sup>P NMR spectra recorded for the reactions of **3a**[OTf]<sub>2</sub> with DBN in PhF or THF reveal the formation of non-separable mixtures (**FigureS112-113**).

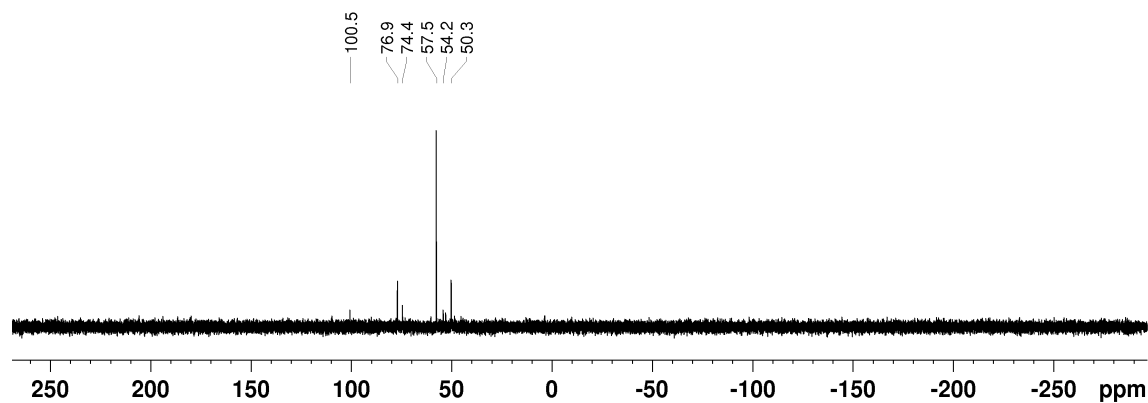

**Figure S112.**  $^{31}\text{P}\{\text{H}\}$  NMR spectrum of reaction of **3a**[OTf] $_2$  with 1 eq. DBN in THF, ( $\text{C}_6\text{D}_6$  cap., 300 K).

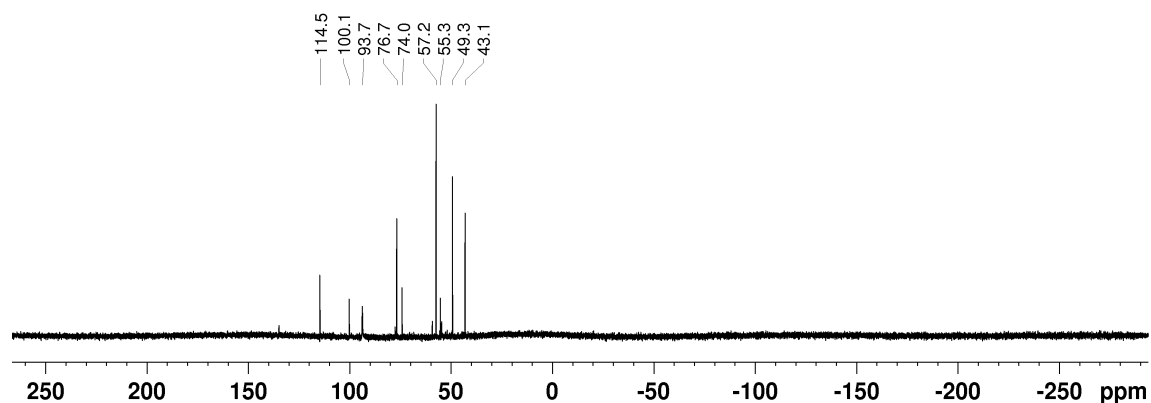

**Figure S113.**  $^{31}\text{P}\{\text{H}\}$  NMR spectrum of reaction of **3a**[OTf] $_2$  with 1 eq. DBN in PhF, ( $\text{C}_6\text{D}_6$  cap., 300 K).

## S5 CO $_2$ activation

A 10 mL Schlenk tube charged with **11** (200 mg) in THF (5 mL) was connected with a CO $_2$  cylinder (**Fig. S112**, blue). After replacing the atmosphere to CO $_2$  (1 bar), the deep orange solution was exposed to CO $_2$  and then rapidly turned yellow within seconds. The reaction mixture was kept under a CO $_2$  atmosphere for 10-30 min until no further visibly color change was observed (**Fig. S112**, red).

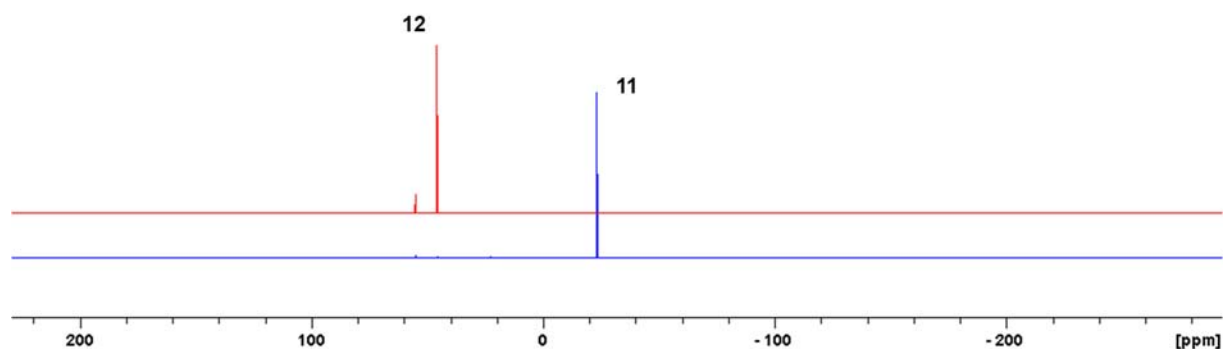

**Figure S114.**  $^{31}\text{P}\{\text{H}\}$  NMR spectrum of CO $_2$  activation before (blue) and after 20 min (red) ( $\text{C}_6\text{D}_6$  cap., 300 K).

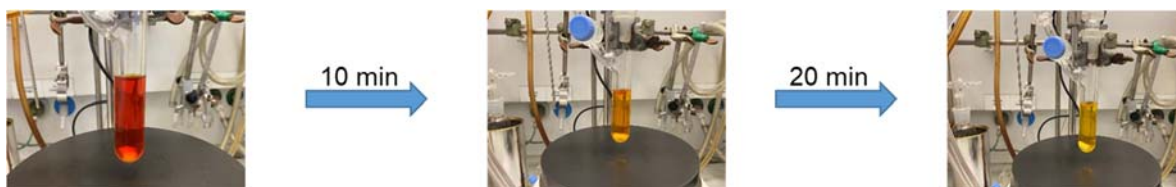

**Figure S115.** The colour change of the solution of **11** in THF under a CO<sub>2</sub> atmosphere (1 atm) within 20 min.

### S6 CS<sub>2</sub> activation

To a solution of **11** (50 mg, 0.09 mmol, 1 eq.) in THF (3 mL), CS<sub>2</sub> (14 mg, 0.18 mmol, 2 eq.) was added at room temperature, and the color change was monitored. The <sup>31</sup>P NMR spectrum of the starting materials is shown in Fig. S116d (blue), and then the spectrum was recorded after 10 min is shown in Fig. S114d (red).

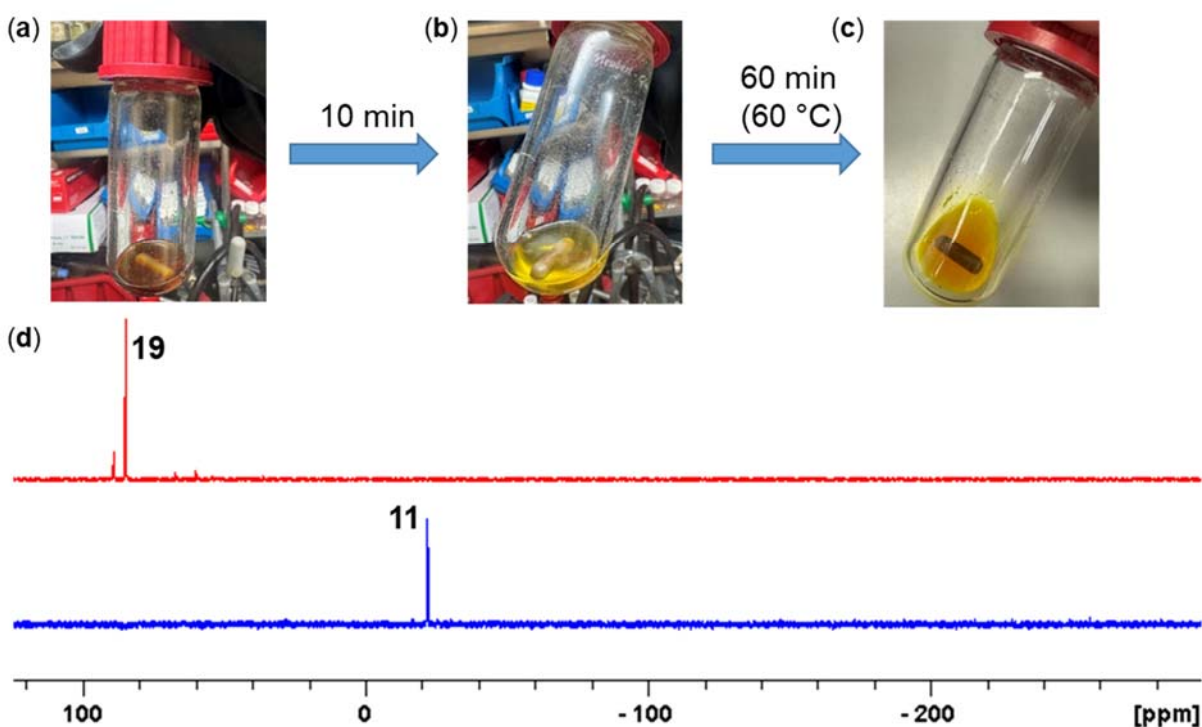

**Figure S116.** Color change during the reaction of **11** with CS<sub>2</sub>, r.t. (a) Starting materials; (b) 10 min; (c) 20 min. (d) The <sup>31</sup>P NMR spectrum of **11** (blue). 2 eq. CS<sub>2</sub>, r.t., C<sub>6</sub>D<sub>6</sub>, 10 min (red).

## S7 X-ray Diffraction Refinements

Suitable single crystals were coated with Paratone-N oil, mounted using a nylon loop and frozen in the cold nitrogen stream. X-ray diffraction data were collected at 100 K unless otherwise mentioned on a Rigaku Oxford Diffraction SuperNova diffractometer using either Cu  $K_{\alpha}$  radiation ( $\lambda = 1.54184 \text{ \AA}$ ) or Mo  $K_{\alpha}$  ( $\lambda = 0.71073 \text{ \AA}$ ) generated by Nova micro-focus sources. Reflections were collected with an Atlas S2 detector. The data reduction and absorption correction was performed using CrysAlisPro<sup>[3]</sup> software. Using Olex2<sup>[4]</sup>, the structures were solved with SHELXT<sup>[5]</sup> by direct methods and refined with SHELXL<sup>[6]</sup> by least-square minimization against  $F^2$  using first isotropic and later anisotropic thermal parameters for all non-hydrogen atoms. Hydrogen atoms were added to the structure models on calculated positions using the riding model. All other hydrogen atoms were localized in the difference Fourier map. Images of the structures were produced with the Olex2 software. All structures have been deposited with the Cambridge Crystallographic Data Centre (CCDC) and can be accessed free of charge under the numbers 2543129–2543151.

Occurring disorders in the structure refinements of *syn-3a*[OTf]<sub>2</sub> · CH<sub>2</sub>Cl<sub>2</sub>, *E-15*[OTf], and **22**[OTf]<sub>2</sub> · 1.25 CH<sub>2</sub>Cl<sub>2</sub> could be modelled and refined without the use of constraints or restraints. In the structure refinements of **2**[OTf]<sub>2</sub>, **5a**[OTf] · 0.5 CH<sub>2</sub>Cl<sub>2</sub>, **6**[OTf]<sub>2</sub> · 0.666 CH<sub>2</sub>Cl<sub>2</sub>, and **10**[OTf] SADI, SIMU, and RIGU restraints were applied to solve occurring disorders of the triflate anions or the cations. The crystal of *syn-3a*[OTf]<sub>2</sub> · CH<sub>2</sub>Cl<sub>2</sub> was obtained and measured as a non-merohedral twin, but only the reflections of the major component were used for structure solution and refinement. The crystal of **18** was obtained, measured, and refined as a non-merohedral twin (BASF = 0.5379). In the refinement of **5b**[OTf] · 0.5 CH<sub>2</sub>Cl<sub>2</sub> one triflate anion was found to be disordered over three positions, which was modelled using RIGU, SIMU, SADI and EADP commands and the occupancies have been set to 0.7, 0.2 and 0.1, respectively. Due to low occupancy, the minor part was refined isotropically. The PLATON/SQUEEZE<sup>[7]</sup> extension in Olex2 was used for a solvent mask in the refinement of **5a**[OTf]<sub>2</sub> · 0.5 CH<sub>2</sub>Cl<sub>2</sub> (solvent mask for 0.5 CH<sub>2</sub>Cl<sub>2</sub> per asymmetric unit), **6**[OTf]<sub>2</sub> · 0.666 CH<sub>2</sub>Cl<sub>2</sub> (solvent mask for 0.666 CH<sub>2</sub>Cl<sub>2</sub> per asymmetric unit) and **22**[OTf]<sub>2</sub> · 1.25 CH<sub>2</sub>Cl<sub>2</sub> (solvent mask for 1.25 CH<sub>2</sub>Cl<sub>2</sub> per asymmetric unit).

| compound                                       | <b>2</b> [OTf] <sub>2</sub>                                                          | <i>anti</i> - <b>3a</b> [OTf] <sub>2</sub>                                           | <i>syn</i> - <b>3a</b> [OTf] <sub>2</sub> · CH <sub>2</sub> Cl <sub>2</sub>                          | <i>anti</i> - <b>3b</b> [OTf] <sub>2</sub>                                           |
|------------------------------------------------|--------------------------------------------------------------------------------------|--------------------------------------------------------------------------------------|------------------------------------------------------------------------------------------------------|--------------------------------------------------------------------------------------|
| Empirical formula                              | C <sub>37</sub> H <sub>45</sub> F <sub>6</sub> N <sub>6</sub> O <sub>6</sub> PS<br>2 | C <sub>39</sub> H <sub>41</sub> F <sub>6</sub> N <sub>4</sub> O <sub>6</sub> PS<br>2 | C <sub>40</sub> H <sub>43</sub> Cl <sub>2</sub> F <sub>6</sub> N <sub>4</sub> O <sub>6</sub> PS<br>2 | C <sub>40</sub> H <sub>43</sub> F <sub>6</sub> N <sub>4</sub> O <sub>7</sub> PS<br>2 |
| Formula weight                                 | 878.88                                                                               | 870.85                                                                               | 955.77                                                                                               | 900.87                                                                               |
| Temperature/K                                  | 100.00(10)                                                                           | 99.98(10)                                                                            | 100.01(10)                                                                                           | 100.00(10)                                                                           |
| Crystal system                                 | monoclinic                                                                           | orthorhombic                                                                         | monoclinic                                                                                           | orthorhombic                                                                         |
| Space group                                    | P2 <sub>1</sub> /c                                                                   | Pbca                                                                                 | P2 <sub>1</sub> /c                                                                                   | Pbca                                                                                 |
| a/Å                                            | 9.1704(2)                                                                            | 17.74070(10)                                                                         | 9.43440(10)                                                                                          | 17.84400(10)                                                                         |
| b/Å                                            | 23.2550(3)                                                                           | 15.85540(10)                                                                         | 42.3893(6)                                                                                           | 16.05310(10)                                                                         |
| c/Å                                            | 19.6069(3)                                                                           | 28.0985(2)                                                                           | 11.1640(2)                                                                                           | 28.8792(2)                                                                           |
| α/°                                            | 90                                                                                   | 90                                                                                   | 90                                                                                                   | 90                                                                                   |
| β/°                                            | 101.091(2)                                                                           | 90                                                                                   | 100.123(2)                                                                                           | 90                                                                                   |
| γ/°                                            | 90                                                                                   | 90                                                                                   | 90                                                                                                   | 90                                                                                   |
| Volume/Å <sup>3</sup>                          | 4103.23(12)                                                                          | 7903.71(9)                                                                           | 4395.18(11)                                                                                          | 8272.49(9)                                                                           |
| Z                                              | 4                                                                                    | 8                                                                                    | 4                                                                                                    | 8                                                                                    |
| ρ <sub>calc</sub> /cm <sup>3</sup>             | 1.423                                                                                | 1.464                                                                                | 1.444                                                                                                | 1.447                                                                                |
| μ/mm <sup>-1</sup>                             | 2.245                                                                                | 2.314                                                                                | 3.224                                                                                                | 2.249                                                                                |
| F(000)                                         | 1832.0                                                                               | 3616.0                                                                               | 1976.0                                                                                               | 3744.0                                                                               |
| Crystal size/mm <sup>3</sup>                   | 0.184 × 0.104 ×<br>0.086                                                             | 0.22 × 0.17 ×<br>0.11                                                                | 0.343 × 0.213 ×<br>0.116                                                                             | 0.206 × 0.126 ×<br>0.097                                                             |
| Radiation                                      | Cu Kα (λ =<br>1.54184)                                                               | Cu Kα (λ =<br>1.54184)                                                               | Cu Kα (λ = 1.54184)                                                                                  | Cu Kα (λ =<br>1.54184)                                                               |
| 2θ range for data<br>collection/°              | 5.962 to 136.5                                                                       | 6.292 to 153.488                                                                     | 4.168 to 136.46                                                                                      | 6.12 to 153.306                                                                      |
| Index ranges                                   | -11 ≤ h ≤ 11, -20<br>≤ k ≤ 28, -23 ≤ l ≤<br>23                                       | -20 ≤ h ≤ 22, -20<br>≤ k ≤ 16, -35 ≤ l ≤<br>31                                       | -11 ≤ h ≤ 11, -50 ≤ k<br>≤ 50, -13 ≤ l ≤ 13                                                          | -22 ≤ h ≤ 19, -19<br>≤ k ≤ 16, -36 ≤ l ≤<br>36                                       |
| Reflections collected                          | 35409                                                                                | 93192                                                                                | 16085                                                                                                | 89140                                                                                |
| Independent reflections                        | 7484 [R <sub>int</sub> =<br>0.0638, R <sub>sigma</sub> =<br>0.0456]                  | 8298 [R <sub>int</sub> =<br>0.0410, R <sub>sigma</sub> =<br>0.0170]                  | 7896 [R <sub>int</sub> = 0.0031,<br>R <sub>sigma</sub> = 0.0154]                                     | 8679 [R <sub>int</sub> =<br>0.0434, R <sub>sigma</sub> =<br>0.0196]                  |
| Data/restraints/parameter<br>s                 | 7484/222/606                                                                         | 8298/0/529                                                                           | 7896/0/657                                                                                           | 8679/0/548                                                                           |
| Goodness-of-fit on F <sup>2</sup>              | 1.050                                                                                | 1.065                                                                                | 1.110                                                                                                | 1.027                                                                                |
| Final R indexes [I ≥ 2σ (I)]                   | R <sub>1</sub> = 0.0646,<br>wR <sub>2</sub> = 0.1639                                 | R <sub>1</sub> = 0.0358,<br>wR <sub>2</sub> = 0.0951                                 | R <sub>1</sub> = 0.0771, wR <sub>2</sub> =<br>0.2068                                                 | R <sub>1</sub> = 0.0355, wR <sub>2</sub><br>= 0.0927                                 |
| Final R indexes [all data]                     | R <sub>1</sub> = 0.0803,<br>wR <sub>2</sub> = 0.1794                                 | R <sub>1</sub> = 0.0392,<br>wR <sub>2</sub> = 0.0975                                 | R <sub>1</sub> = 0.0808, wR <sub>2</sub> =<br>0.2090                                                 | R <sub>1</sub> = 0.0397, wR <sub>2</sub><br>= 0.0962                                 |
| Largest diff. peak/hole / e<br>Å <sup>-3</sup> | 0.80/-0.34                                                                           | 0.63/-0.45                                                                           | 0.99/-0.38                                                                                           | 0.90/-0.60                                                                           |
| CCDC                                           | 2543129                                                                              | 2543138                                                                              | 2543136                                                                                              | 2543144                                                                              |

| compound                                       | <b>5a</b> [OTf] · 0.5<br>CH <sub>2</sub> Cl <sub>2</sub>                          | <b>5b</b> [OTf] · 0.5<br>CH <sub>2</sub> Cl <sub>2</sub>             | <b>5c</b> [OTf]                                                                 | <b>4</b>                                                                        |
|------------------------------------------------|-----------------------------------------------------------------------------------|----------------------------------------------------------------------|---------------------------------------------------------------------------------|---------------------------------------------------------------------------------|
| Empirical formula                              | C <sub>34.5</sub> H <sub>29</sub> N <sub>5</sub> O <sub>5</sub> F <sub>3</sub> PS | C <sub>35.5</sub> H <sub>33</sub> N <sub>4</sub> O <sub>4</sub> PS   | C <sub>34</sub> H <sub>29</sub> N <sub>5</sub> O <sub>5</sub> F <sub>3</sub> PS | C <sub>34</sub> H <sub>29</sub> N <sub>5</sub> O <sub>5</sub> F <sub>3</sub> PS |
| Formula weight                                 | 705.11                                                                            | 735.14                                                               | 707.65                                                                          | 707.65                                                                          |
| Temperature/K                                  | 100.00(10)                                                                        | 100.01(10)                                                           | 100.01(10)                                                                      | 100.01(10)                                                                      |
| Crystal system                                 | triclinic                                                                         | triclinic                                                            | monoclinic                                                                      | monoclinic                                                                      |
| Space group                                    | P-1                                                                               | P-1                                                                  | P21/n                                                                           | P21/c                                                                           |
| a/Å                                            | 10.4342(3)                                                                        | 13.2969(3)                                                           | 9.17460(10)                                                                     | 15.66520(10)                                                                    |
| b/Å                                            | 10.5465(2)                                                                        | 15.9518(4)                                                           | 10.54190(10)                                                                    | 10.46510(10)                                                                    |
| c/Å                                            | 16.4251(3)                                                                        | 17.2318(3)                                                           | 33.3887(5)                                                                      | 20.0155(2)                                                                      |
| α/°                                            | 86.891(2)                                                                         | 98.847(2)                                                            | 90                                                                              | 90                                                                              |
| β/°                                            | 84.174(2)                                                                         | 98.504(2)                                                            | 96.8680(10)                                                                     | 90.5890(10)                                                                     |
| γ/°                                            | 69.862(2)                                                                         | 105.389(2)                                                           | 90                                                                              | 90                                                                              |
| Volume/Å <sup>3</sup>                          | 1687.86(7)                                                                        | 3413.07(14)                                                          | 3206.11(7)                                                                      | 3281.13(5)                                                                      |
| Z                                              | 2                                                                                 | 4                                                                    | 4                                                                               | 4                                                                               |
| ρ <sub>calc</sub> /cm <sup>3</sup>             | 1.387                                                                             | 1.431                                                                | 1.466                                                                           | 1.433                                                                           |
| μ/mm <sup>-1</sup>                             | 2.525                                                                             | 2.544                                                                | 1.972                                                                           | 1.927                                                                           |
| F(000)                                         | 730.0                                                                             | 1524.0                                                               | 1464.0                                                                          | 1464.0                                                                          |
| Crystal size/mm <sup>3</sup>                   | 0.2 × 0.18 × 0.13                                                                 | 0.243 × 0.181 ×<br>0.041                                             | 0.2 × 0.13 ×<br>0.01                                                            | 0.18 × 0.13 ×<br>0.08                                                           |
| Radiation                                      | Cu Kα (λ =<br>1.54184)                                                            | Cu Kα (λ =<br>1.54184)                                               | Cu Kα (λ =<br>1.54184)                                                          | Cu Kα (λ =<br>1.54184)                                                          |
| 2θ range for data<br>collection/°              | 5.41 to 153.24                                                                    | 5.296 to 153.532                                                     | 5.332 to<br>153.676                                                             | 5.642 to<br>153.374                                                             |
| Index ranges                                   | -13 ≤ h ≤ 9, -13 ≤ k<br>≤ 13, -20 ≤ l ≤ 18                                        | -13 ≤ h ≤ 16, -19 ≤ k<br>≤ 20, -21 ≤ l ≤ 21                          | -10 ≤ h ≤ 11, -13<br>≤ k ≤ 12, -41 ≤ l<br>≤ 41                                  | -19 ≤ h ≤ 19, -13<br>≤ k ≤ 10, -24 ≤ l<br>≤ 25                                  |
| Reflections collected                          | 18674                                                                             | 40277                                                                | 37891                                                                           | 38707                                                                           |
| Independent reflections                        | 7009 [R <sub>int</sub> = 0.0154,<br>R <sub>sigma</sub> = 0.0155]                  | 14201 [R <sub>int</sub> =<br>0.0315, R <sub>sigma</sub> =<br>0.0340] | 6717 [R <sub>int</sub> =<br>0.0453, R <sub>sigma</sub> =<br>0.0314]             | 6869 [R <sub>int</sub> =<br>0.0356, R <sub>sigma</sub> =<br>0.0231]             |
| Data/restraints/parameters                     | 7009/6/490                                                                        | 14201/639/984                                                        | 6717/0/444                                                                      | 6869/0/444                                                                      |
| Goodness-of-fit on F <sup>2</sup>              | 1.023                                                                             | 1.041                                                                | 1.055                                                                           | 1.053                                                                           |
| Final R indexes [I >= 2σ (I)]                  | R <sub>1</sub> = 0.0321, wR <sub>2</sub> =<br>0.0807                              | R <sub>1</sub> = 0.0540, wR <sub>2</sub> =<br>0.1493                 | R <sub>1</sub> = 0.0483,<br>wR <sub>2</sub> = 0.1247                            | R <sub>1</sub> = 0.0586,<br>wR <sub>2</sub> = 0.1580                            |
| Final R indexes [all data]                     | R <sub>1</sub> = 0.0328, wR <sub>2</sub> =<br>0.0812                              | R <sub>1</sub> = 0.0608, wR <sub>2</sub> =<br>0.1575                 | R <sub>1</sub> = 0.0555,<br>wR <sub>2</sub> = 0.1293                            | R <sub>1</sub> = 0.0633,<br>wR <sub>2</sub> = 0.1620                            |
| Largest diff. peak/hole / e<br>Å <sup>-3</sup> | 0.33/-0.36                                                                        | 0.88/-1.08                                                           | 0.99/-0.55                                                                      | 0.91/-0.50                                                                      |
| CCDC                                           | 2543134                                                                           | 2543145                                                              | 2543142                                                                         | 2543140                                                                         |

| compound                                       | <b>6</b> · 0.666 CH <sub>2</sub> Cl <sub>2</sub>                                                                      | <b>7</b>                                                                | <b>8</b>                                                               | <b>9</b>                                                               |
|------------------------------------------------|-----------------------------------------------------------------------------------------------------------------------|-------------------------------------------------------------------------|------------------------------------------------------------------------|------------------------------------------------------------------------|
| Empirical formula                              | C <sub>47.67</sub> H <sub>54.33</sub> Cl <sub>1.33</sub> F <sub>6</sub> N <sub>6</sub> O <sub>7</sub> PS <sub>2</sub> | C <sub>32</sub> H <sub>25</sub> N <sub>2</sub> P                        | C <sub>32</sub> H <sub>25</sub> N <sub>2</sub> OP                      | C <sub>38</sub> H <sub>30</sub> N <sub>3</sub> P                       |
| Formula weight                                 | 1079.58                                                                                                               | 468.51                                                                  | 484.51                                                                 | 559.62                                                                 |
| Temperature/K                                  | 100.01(10)                                                                                                            | 100.00(10)                                                              | 150.00(10)                                                             | 100.00(10)                                                             |
| Crystal system                                 | monoclinic                                                                                                            | monoclinic                                                              | monoclinic                                                             | triclinic                                                              |
| Space group                                    | P21/n                                                                                                                 | P2 <sub>1</sub> /n                                                      | P2 <sub>1</sub> /c                                                     | P-1                                                                    |
| a/Å                                            | 17.3414(7)                                                                                                            | 13.50722(5)                                                             | 9.01480(10)                                                            | 9.5529(2)                                                              |
| b/Å                                            | 18.3069(6)                                                                                                            | 18.70307(8)                                                             | 33.8472(4)                                                             | 9.55480(10)                                                            |
| c/Å                                            | 17.6341(9)                                                                                                            | 19.49900(9)                                                             | 9.00450(10)                                                            | 15.9643(2)                                                             |
| α/°                                            | 90                                                                                                                    | 90                                                                      | 90                                                                     | 85.1780(10)                                                            |
| β/°                                            | 108.228(5)                                                                                                            | 93.7865(4)                                                              | 111.609(2)                                                             | 82.7180(10)                                                            |
| γ/°                                            | 90                                                                                                                    | 90                                                                      | 90                                                                     | 86.5190(10)                                                            |
| Volume/Å <sup>3</sup>                          | 5317.3(4)                                                                                                             | 4915.21(4)                                                              | 2554.41(6)                                                             | 1438.44(4)                                                             |
| Z                                              | 4                                                                                                                     | 8                                                                       | 4                                                                      | 2                                                                      |
| ρ <sub>calc</sub> /cm <sup>3</sup>             | 1.349                                                                                                                 | 1.266                                                                   | 1.260                                                                  | 1.292                                                                  |
| μ/mm <sup>-1</sup>                             | 2.452                                                                                                                 | 1.159                                                                   | 1.162                                                                  | 1.089                                                                  |
| F(000)                                         | 2248.0                                                                                                                | 1968.0                                                                  | 1016.0                                                                 | 588.0                                                                  |
| Crystal size/mm <sup>3</sup>                   | 0.328 × 0.256 × 0.01                                                                                                  | 0.393 × 0.231<br>× 0.191                                                | 0.252 × 0.194<br>× 0.064                                               | 0.37 × 0.274 ×<br>0.197                                                |
| Radiation                                      | Cu Kα (λ = 1.54184)                                                                                                   | Cu Kα (λ =<br>1.54184)                                                  | Cu Kα (λ =<br>1.54184)                                                 | Cu Kα (λ =<br>1.54184)                                                 |
| 2θ range for data<br>collection/°              | 6.24 to 136.496                                                                                                       | 6.556 to<br>153.544                                                     | 5.222 to<br>153.072                                                    | 5.598 to<br>153.478                                                    |
| Index ranges                                   | -20 ≤ h ≤ 20, -11 ≤ k ≤ 22, -<br>21 ≤ l ≤ 21                                                                          | -15 ≤ h ≤ 17, -<br>23 ≤ k ≤ 23, -<br>23 ≤ l ≤ 24                        | -11 ≤ h ≤ 9, -<br>42 ≤ k ≤ 41, -<br>10 ≤ l ≤ 11                        | -12 ≤ h ≤ 11, -<br>11 ≤ k ≤ 9, -20<br>≤ l ≤ 20                         |
| Reflections collected                          | 43868                                                                                                                 | 58615                                                                   | 23421                                                                  | 16353                                                                  |
| Independent reflections                        | 9707 [R <sub>int</sub> = 0.0989, R <sub>sigma</sub> =<br>0.0606]                                                      | 10295 [R <sub>int</sub> =<br>0.0241,<br>R <sub>sigma</sub> =<br>0.0157] | 5295 [R <sub>int</sub> =<br>0.0299,<br>R <sub>sigma</sub> =<br>0.0219] | 5969 [R <sub>int</sub> =<br>0.0183,<br>R <sub>sigma</sub> =<br>0.0191] |
| Data/restraints/parameters                     | 9707/334/704                                                                                                          | 10295/0/631                                                             | 5295/0/325                                                             | 5969/0/379                                                             |
| Goodness-of-fit on F <sup>2</sup>              | 1.031                                                                                                                 | 1.012                                                                   | 1.040                                                                  | 1.039                                                                  |
| Final R indexes [I>=2σ (I)]                    | R <sub>1</sub> = 0.0749, wR <sub>2</sub> = 0.2038                                                                     | R <sub>1</sub> = 0.0314,<br>wR <sub>2</sub> = 0.0782                    | R <sub>1</sub> = 0.0331,<br>wR <sub>2</sub> = 0.0827                   | R <sub>1</sub> = 0.0351,<br>wR <sub>2</sub> = 0.0890                   |
| Final R indexes [all data]                     | R <sub>1</sub> = 0.0913, wR <sub>2</sub> = 0.2189                                                                     | R <sub>1</sub> = 0.0328,<br>wR <sub>2</sub> = 0.0794                    | R <sub>1</sub> = 0.0375,<br>wR <sub>2</sub> = 0.0861                   | R <sub>1</sub> = 0.0360,<br>wR <sub>2</sub> = 0.0896                   |
| Largest diff. peak/hole / e<br>Å <sup>-3</sup> | 0.67/-0.43                                                                                                            | 0.26/-0.40                                                              | 0.22/-0.29                                                             | 0.27/-0.38                                                             |
| CCDC                                           | 2543147                                                                                                               | 2543139                                                                 | 2543135                                                                | 2543133                                                                |

| compound                                       | <b>10</b> [OTf]                                                                 | <b>11</b>                                                           | <i>syn-12</i>                                                       | <i>anti-12</i>                                                      |
|------------------------------------------------|---------------------------------------------------------------------------------|---------------------------------------------------------------------|---------------------------------------------------------------------|---------------------------------------------------------------------|
| Empirical formula                              | C <sub>36</sub> H <sub>36</sub> N <sub>4</sub> O <sub>3</sub> F <sub>3</sub> PS | C <sub>35</sub> H <sub>35</sub> N <sub>4</sub> P                    | C <sub>26</sub> H <sub>21</sub> N <sub>2</sub> OP                   | C <sub>26</sub> H <sub>21</sub> N <sub>2</sub> OP                   |
| Formula weight                                 | 692.72                                                                          | 542.64                                                              | 408.42                                                              | 408.42                                                              |
| Temperature/K                                  | 100.00(10)                                                                      | 100.00(10)                                                          | 100.01(10)                                                          | 99.97(10)                                                           |
| Crystal system                                 | monoclinic                                                                      | triclinic                                                           | orthorhombic                                                        | triclinic                                                           |
| Space group                                    | P2 <sub>1</sub> /c                                                              | P-1                                                                 | P2 <sub>1</sub> 2 <sub>1</sub> 2 <sub>1</sub>                       | P-1                                                                 |
| a/Å                                            | 10.0429(3)                                                                      | 10.5011(2)                                                          | 5.74170(10)                                                         | 10.6649(3)                                                          |
| b/Å                                            | 19.3727(4)                                                                      | 12.0748(2)                                                          | 17.5861(3)                                                          | 11.0616(4)                                                          |
| c/Å                                            | 17.4908(4)                                                                      | 12.6952(2)                                                          | 20.7540(2)                                                          | 11.2084(3)                                                          |
| α/°                                            | 90                                                                              | 93.1740(10)                                                         | 90                                                                  | 105.269(3)                                                          |
| β/°                                            | 101.484(2)                                                                      | 109.5810(10)                                                        | 90                                                                  | 103.598(3)                                                          |
| γ/°                                            | 90                                                                              | 110.2380(10)                                                        | 90                                                                  | 112.485(3)                                                          |
| Volume/Å <sup>3</sup>                          | 3334.85(14)                                                                     | 1396.04(4)                                                          | 2095.62(5)                                                          | 1091.77(7)                                                          |
| Z                                              | 4                                                                               | 2                                                                   | 4                                                                   | 2                                                                   |
| ρ <sub>calc</sub> /cm <sup>3</sup>             | 1.380                                                                           | 1.291                                                               | 1.294                                                               | 1.242                                                               |
| μ/mm <sup>-1</sup>                             | 1.824                                                                           | 1.109                                                               | 1.313                                                               | 1.261                                                               |
| F(000)                                         | 1448.0                                                                          | 576.0                                                               | 856.0                                                               | 428.0                                                               |
| Crystal size/mm <sup>3</sup>                   | 0.27 × 0.07 × 0.04                                                              | 0.18 × 0.15 ×<br>0.07                                               | 0.42 × 0.07 ×<br>0.04                                               | 0.377 × 0.267 ×<br>0.174                                            |
| Radiation                                      | Cu Kα (λ = 1.54184)                                                             | Cu Kα (λ =<br>1.54184)                                              | Cu Kα (λ =<br>1.54184)                                              | Cu Kα (λ =<br>1.54184)                                              |
| 2θ range for data collection/°                 | 6.886 to 144.248                                                                | 7.534 to 153.376                                                    | 6.588 to 153.668                                                    | 8.828 to 153.148                                                    |
| Index ranges                                   | -11 ≤ h ≤ 12, -23 ≤ k<br>≤ 20, -21 ≤ l ≤ 21                                     | -13 ≤ h ≤ 13, -14<br>≤ k ≤ 15, -16 ≤ l ≤<br>15                      | -7 ≤ h ≤ 7, -22 ≤<br>k ≤ 22, -26 ≤ l ≤<br>18                        | -10 ≤ h ≤ 13, -13<br>≤ k ≤ 13, -13 ≤ l<br>≤ 14                      |
| Reflections collected                          | 19978                                                                           | 20058                                                               | 22305                                                               | 10030                                                               |
| Independent reflections                        | 6561 [R <sub>int</sub> = 0.0568,<br>R <sub>sigma</sub> = 0.0591]                | 5853 [R <sub>int</sub> =<br>0.0328, R <sub>sigma</sub> =<br>0.0336] | 4386 [R <sub>int</sub> =<br>0.0662, R <sub>sigma</sub> =<br>0.0439] | 4470 [R <sub>int</sub> =<br>0.0235, R <sub>sigma</sub> =<br>0.0295] |
| Data/restraints/parameters                     | 6561/6/488                                                                      | 5853/0/361                                                          | 4386/0/271                                                          | 4470/0/271                                                          |
| Goodness-of-fit on F <sup>2</sup>              | 1.026                                                                           | 1.035                                                               | 1.038                                                               | 1.042                                                               |
| Final R indexes [I ≥ 2σ (I)]                   | R <sub>1</sub> = 0.0610, wR <sub>2</sub> =<br>0.1579                            | R <sub>1</sub> = 0.0358, wR <sub>2</sub><br>= 0.0849                | R <sub>1</sub> = 0.0391,<br>wR <sub>2</sub> = 0.0969                | R <sub>1</sub> = 0.0342,<br>wR <sub>2</sub> = 0.0836                |
| Final R indexes [all data]                     | R <sub>1</sub> = 0.0854, wR <sub>2</sub> =<br>0.1735                            | R <sub>1</sub> = 0.0428, wR <sub>2</sub><br>= 0.0891                | R <sub>1</sub> = 0.0424,<br>wR <sub>2</sub> = 0.0996                | R <sub>1</sub> = 0.0384,<br>wR <sub>2</sub> = 0.0870                |
| Largest diff. peak/hole / e<br>Å <sup>-3</sup> | 0.78/-0.31                                                                      | 0.37/-0.33                                                          | 0.50/-0.45                                                          | 0.28/-0.39                                                          |
| CCDC                                           | 2543149                                                                         | 2543151                                                             | 2543148                                                             | 2543130                                                             |

| compound                                       | <b>14</b> [OTf]                                                                | <b>15</b> [OTf]                                                                | <b>16</b> [OTf]                                                                | <b>17</b> [OTf]                                                                |
|------------------------------------------------|--------------------------------------------------------------------------------|--------------------------------------------------------------------------------|--------------------------------------------------------------------------------|--------------------------------------------------------------------------------|
| Empirical formula                              | C <sub>18</sub> H <sub>23</sub> N <sub>2</sub> O <sub>3</sub> F <sub>3</sub> S | C <sub>18</sub> H <sub>23</sub> N <sub>2</sub> O <sub>4</sub> F <sub>3</sub> S | C <sub>17</sub> H <sub>20</sub> F <sub>3</sub> N <sub>3</sub> O <sub>5</sub> S | C <sub>19</sub> H <sub>23</sub> F <sub>3</sub> N <sub>2</sub> O <sub>3</sub> S |
| Formula weight                                 | 404.44                                                                         | 420.44                                                                         | 435.42                                                                         | 416.45                                                                         |
| Temperature/K                                  | 100.00(10)                                                                     | 100.01(10)                                                                     | 100.01(10)                                                                     | 100.00(10)                                                                     |
| Crystal system                                 | monoclinic                                                                     | monoclinic                                                                     | monoclinic                                                                     | monoclinic                                                                     |
| Space group                                    | P21/n                                                                          | P21/n                                                                          | P21/n                                                                          | P2 <sub>1</sub> /n                                                             |
| a/Å                                            | 10.2066(2)                                                                     | 10.82670(10)                                                                   | 10.84420(10)                                                                   | 9.9108(2)                                                                      |
| b/Å                                            | 10.9132(2)                                                                     | 9.20870(10)                                                                    | 12.17370(10)                                                                   | 11.9804(2)                                                                     |
| c/Å                                            | 17.0530(3)                                                                     | 19.7763(2)                                                                     | 15.17710(10)                                                                   | 16.9047(4)                                                                     |
| α/°                                            | 90                                                                             | 90                                                                             | 90                                                                             | 90                                                                             |
| β/°                                            | 99.618(2)                                                                      | 99.7160(10)                                                                    | 109.7600(10)                                                                   | 101.724(2)                                                                     |
| γ/°                                            | 90                                                                             | 90                                                                             | 90                                                                             | 90                                                                             |
| Volume/Å <sup>3</sup>                          | 1872.78(6)                                                                     | 1943.41(3)                                                                     | 1885.61(3)                                                                     | 1965.31(7)                                                                     |
| Z                                              | 4                                                                              | 4                                                                              | 4                                                                              | 4                                                                              |
| ρ <sub>calc</sub> /cm <sup>3</sup>             | 1.434                                                                          | 1.437                                                                          | 1.534                                                                          | 1.407                                                                          |
| μ/mm <sup>-1</sup>                             | 1.998                                                                          | 1.988                                                                          | 2.131                                                                          | 1.922                                                                          |
| F(000)                                         | 848.0                                                                          | 880.0                                                                          | 904.0                                                                          | 872.0                                                                          |
| Crystal size/mm <sup>3</sup>                   | 0.35 × 0.27 ×<br>0.07                                                          | 0.24 × 0.17 ×<br>0.09                                                          | 0.34 × 0.13 × 0.04                                                             | 0.148 × 0.109 ×<br>0.062                                                       |
| Radiation                                      | Cu Kα (λ =<br>1.54184)                                                         |
| 2θ range for data collection/°                 | 9.458 to 153.026                                                               | 8.75 to 153.276                                                                | 8.782 to 153.404                                                               | 9.112 to 136.476                                                               |
| Index ranges                                   | -11 ≤ h ≤ 12, -13<br>≤ k ≤ 8, -21 ≤ l ≤<br>18                                  | -13 ≤ h ≤ 11, -11<br>≤ k ≤ 9, -24 ≤ l ≤<br>24                                  | -13 ≤ h ≤ 12, -15<br>≤ k ≤ 15, -19 ≤ l ≤<br>18                                 | -11 ≤ h ≤ 9, -14 ≤<br>k ≤ 14, -20 ≤ l ≤<br>19                                  |
| Reflections collected                          | 11711                                                                          | 12319                                                                          | 20646                                                                          | 20835                                                                          |
| Independent reflections                        | 3891 [R <sub>int</sub> =<br>0.0281, R <sub>sigma</sub> =<br>0.0273]            | 4048 [R <sub>int</sub> =<br>0.0315, R <sub>sigma</sub> =<br>0.0278]            | 3950 [R <sub>int</sub> =<br>0.0331, R <sub>sigma</sub> =<br>0.0221]            | 3596 [R <sub>int</sub> =<br>0.0326, R <sub>sigma</sub> =<br>0.0198]            |
| Data/restraints/parameters                     | 3891/0/264                                                                     | 4048/0/254                                                                     | 3950/0/262                                                                     | 3596/18/253                                                                    |
| Goodness-of-fit on F <sup>2</sup>              | 1.057                                                                          | 1.039                                                                          | 1.025                                                                          | 1.065                                                                          |
| Final R indexes [I ≥ 2σ (I)]                   | R <sub>1</sub> = 0.0348, wR <sub>2</sub><br>= 0.0914                           | R <sub>1</sub> = 0.0369, wR <sub>2</sub><br>= 0.0982                           | R <sub>1</sub> = 0.0312, wR <sub>2</sub><br>= 0.0799                           | R <sub>1</sub> = 0.0660,<br>wR <sub>2</sub> = 0.1705                           |
| Final R indexes [all data]                     | R <sub>1</sub> = 0.0369, wR <sub>2</sub><br>= 0.0932                           | R <sub>1</sub> = 0.0408,<br>wR <sub>2</sub> = 0.1021                           | R <sub>1</sub> = 0.0352, wR <sub>2</sub><br>= 0.0832                           | R <sub>1</sub> = 0.0710,<br>wR <sub>2</sub> = 0.1752                           |
| Largest diff. peak/hole / e<br>Å <sup>-3</sup> | 0.36/-0.40                                                                     | 0.40/-0.53                                                                     | 0.31/-0.41                                                                     | 1.50/-0.55                                                                     |
| CCDC                                           | 2543132                                                                        | 2543150                                                                        | 2543141                                                                        | 2543137                                                                        |

| compound                                    | <b>18</b>                                                     | <i>syn-19</i> · THF                                           | <b>20</b>                                                     |
|---------------------------------------------|---------------------------------------------------------------|---------------------------------------------------------------|---------------------------------------------------------------|
| Empirical formula                           | C <sub>11</sub> H <sub>14</sub> N <sub>2</sub> O <sub>3</sub> | C <sub>30</sub> H <sub>29</sub> N <sub>2</sub> OPS            | C <sub>11</sub> H <sub>14</sub> N <sub>2</sub> S <sub>3</sub> |
| Formula weight                              | 222.24                                                        | 496.58                                                        | 270.42                                                        |
| Temperature/K                               | 100.00(10)                                                    | 99.96(17)                                                     | 100.0(3)                                                      |
| Crystal system                              | triclinic                                                     | orthorhombic                                                  | triclinic                                                     |
| Space group                                 | P-1                                                           | Pbca                                                          | P-1                                                           |
| a/Å                                         | 8.3201(4)                                                     | 18.9446(4)                                                    | 8.7162(7)                                                     |
| b/Å                                         | 9.4397(4)                                                     | 10.6707(2)                                                    | 9.4346(7)                                                     |
| c/Å                                         | 13.2132(6)                                                    | 24.9740(4)                                                    | 15.1842(9)                                                    |
| α/°                                         | 85.276(4)                                                     | 90                                                            | 83.523(6)                                                     |
| β/°                                         | 86.892(4)                                                     | 90                                                            | 78.698(6)                                                     |
| γ/°                                         | 87.524(4)                                                     | 90                                                            | 78.006(6)                                                     |
| Volume/Å <sup>3</sup>                       | 1031.93(8)                                                    | 5048.55(16)                                                   | 1194.32(15)                                                   |
| Z                                           | 4                                                             | 8                                                             | 4                                                             |
| ρ <sub>calc</sub> /cm <sup>3</sup>          | 1.430                                                         | 1.307                                                         | 1.504                                                         |
| μ/mm <sup>-1</sup>                          | 0.875                                                         | 1.936                                                         | 5.444                                                         |
| F(000)                                      | 472.0                                                         | 2096.0                                                        | 568.0                                                         |
| Crystal size/mm <sup>3</sup>                | 0.398 × 0.265 × 0.057                                         | 0.12 × 0.1 × 0.05                                             | 0.29 × 0.11 × 0.02                                            |
| Radiation                                   | Cu Kα (λ = 1.54184)                                           | Cu Kα (λ = 1.54184)                                           | Cu Kα (λ = 1.54184)                                           |
| 2θ range for data collection/°              | 6.722 to 153.432                                              | 8.48 to 153.894                                               | 5.952 to 153.482                                              |
| Index ranges                                | -10 ≤ h ≤ 9, -11 ≤ k ≤ 11, -16 ≤ l ≤ 16                       | -22 ≤ h ≤ 18, -12 ≤ k ≤ 10, -31 ≤ l ≤ 28                      | -9 ≤ h ≤ 10, -10 ≤ k ≤ 11, -19 ≤ l ≤ 19                       |
| Reflections collected                       | 8152                                                          | 16462                                                         | 11671                                                         |
| Independent reflections                     | 8152 [R <sub>int</sub> = ?, R <sub>sigma</sub> = 0.0288]      | 5008 [R <sub>int</sub> = 0.0354, R <sub>sigma</sub> = 0.0343] | 4945 [R <sub>int</sub> = 0.0407, R <sub>sigma</sub> = 0.0498] |
| Data/restraints/parameters                  | 8152/0/290                                                    | 5008/0/316                                                    | 4945/0/289                                                    |
| Goodness-of-fit on F <sup>2</sup>           | 1.031                                                         | 1.045                                                         | 1.025                                                         |
| Final R indexes [I ≥ 2σ (I)]                | R <sub>1</sub> = 0.0397, wR <sub>2</sub> = 0.1027             | R <sub>1</sub> = 0.0407, wR <sub>2</sub> = 0.1047             | R <sub>1</sub> = 0.0415, wR <sub>2</sub> = 0.1042             |
| Final R indexes [all data]                  | R <sub>1</sub> = 0.0533, wR <sub>2</sub> = 0.1074             | R <sub>1</sub> = 0.0496, wR <sub>2</sub> = 0.1115             | R <sub>1</sub> = 0.0504, wR <sub>2</sub> = 0.1118             |
| Largest diff. peak/hole / e Å <sup>-3</sup> | 0.26/-0.24                                                    | 0.57/-0.42                                                    | 0.61/-0.38                                                    |
| CCDC                                        | 2543131                                                       | 2543146                                                       | 2543143                                                       |

## S8 Computational Details of P(V)-to-P(III) Conversion

### S8.1 Computational Methodology and Simplifications

The geometries and energies of all systems included in this study were fully optimized without symmetry constraints at the RI-BP86-D4/def2-TZVP level of theory.<sup>8-11</sup> The calculations have been performed by using the program ORCA22 version 6.0. For the calculations we have used the BP86 functional<sup>8,9</sup> with the D4 correction for dispersion and the triple- $\zeta$  def2-TZVP basis set.<sup>11</sup> In order to reproduce solvent effects, we have used the conductor-like continuum model CPCM (for fluorobenzene),<sup>13</sup> which is a variant of the dielectric continuum solvation models. The minimum nature of the complexes and compounds have been confirmed by doing frequency calculations. The transition states were initially located using the NEB tool<sup>14</sup> of ORCA 6.0. They only present one negative frequency that corresponds to the movement of atoms connecting the intermediates. The  $\Delta G^\circ$  energies were computed at normal conditions. For computational efficiency, the reactants were simplified as depicted in **Scheme S4**. Specifically, the phenyl group bonded to one of the nitrogen atoms of the phosphadiazole ring was replaced with a methyl group, as this group is not involved in the mechanistic steps. DMAP was replaced by *p*-aminopyridine (AP), and the N-heterocyclic carbene (**Lc**) was simplified by replacing methyl groups with hydrogen atoms and isopropyl groups with methyl atoms (denoted as **Lc'**). To differentiate theoretical models from experimental compounds, a prime symbol (e.g., **3a'**) is used for the theoretical species.

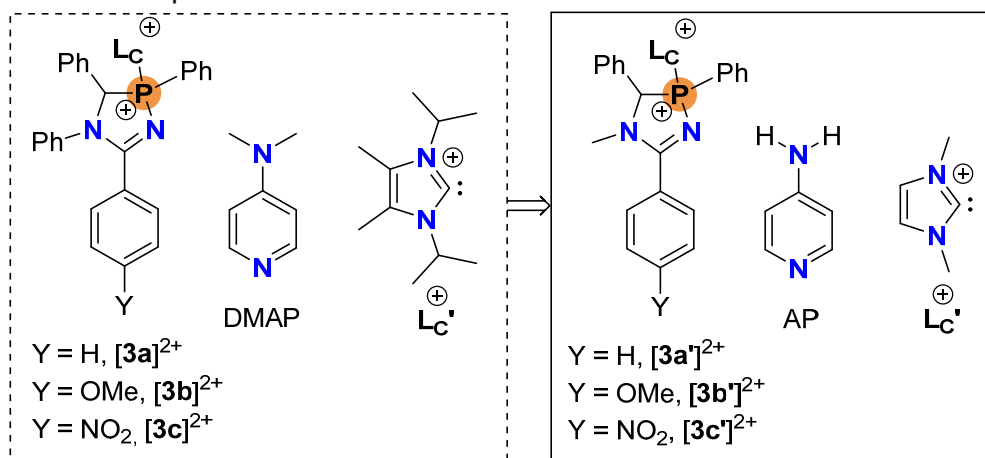

**Scheme S4** Experimental reactants (left) and the simplified models (right) used in the DFT study.

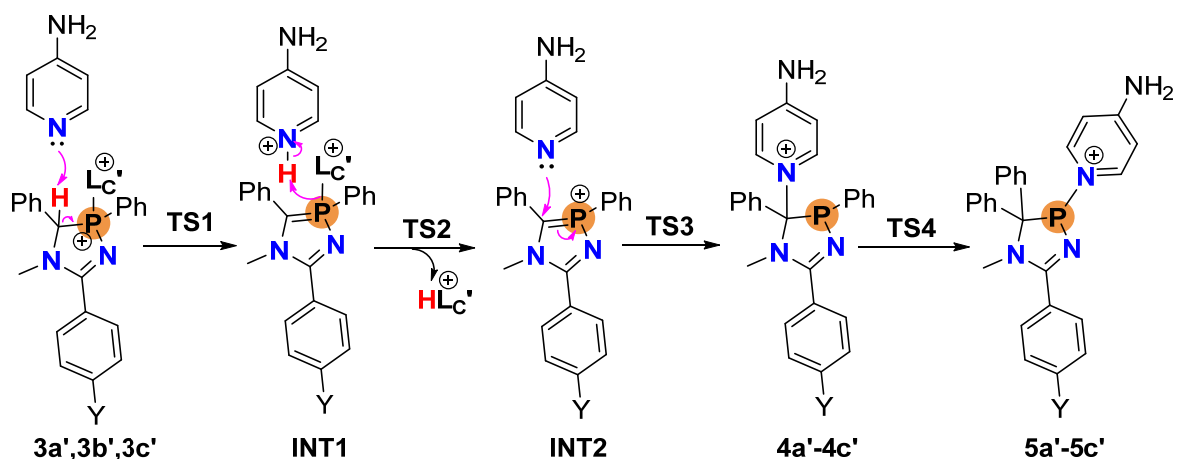

**Scheme S5** Proposed mechanism for the transformation of 3a-c' to 5a-c' via 4a-c', respectively.

## S8.2 Transition State Geometries

The geometries of the transition states for Y = H described in the main text (**Fig. 3**) are provided in **Fig. S115**. The other TS geometries (for Y = NO<sub>2</sub> and OMe) are very similar and provided as cartesian coordinates.

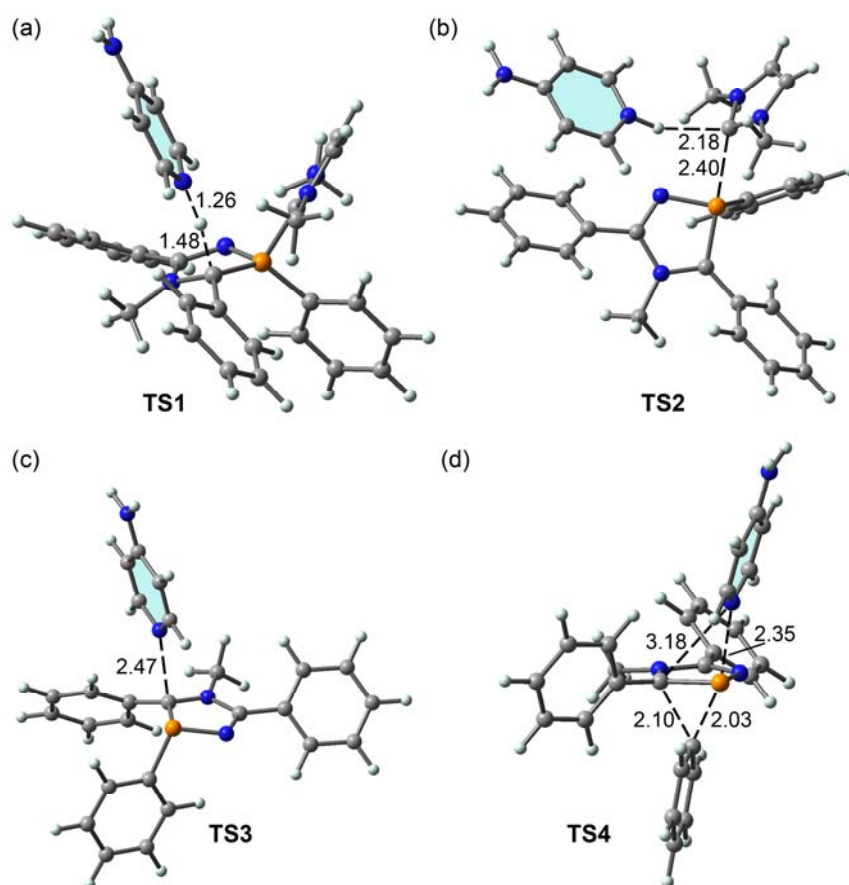

**Figure S117.** BP86-D4/def2-TZVP optimized geometries of TS1-TS4 for Y = H. Distances in Å.

## S9 Computational Details of CO<sub>2</sub> and CS<sub>2</sub> activation

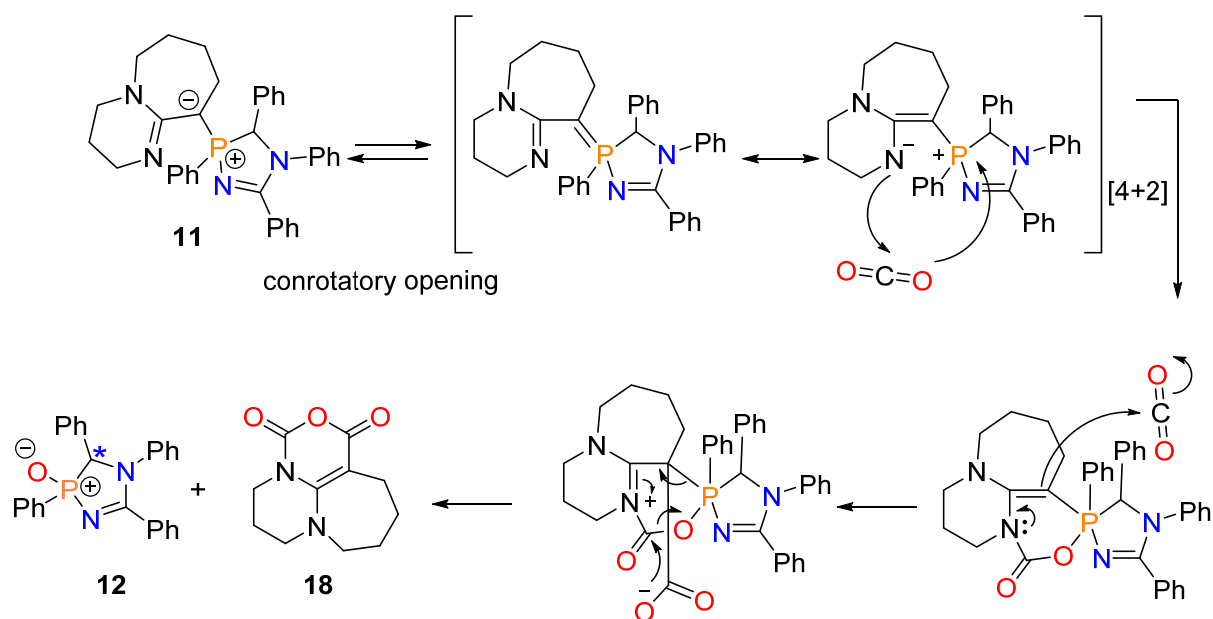

**Figure S118** Proposed mechanism for the reaction of **11** with CO<sub>2</sub> to yield **12** and tricyclic product **18**.

The geometric features of the transition states and intermediates of the CO<sub>2</sub> and CS<sub>2</sub> activation are given in **Figure S117**.

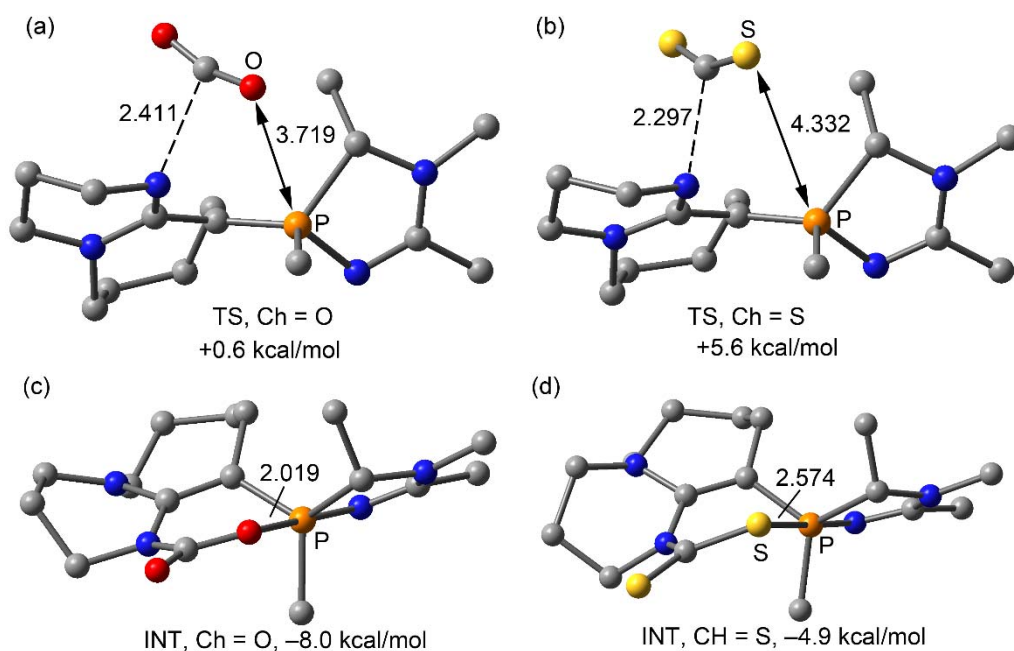

**Figure S 119** BP86-D4/def2-TZVP geometries of the transition states for the (4+2) cycloaddition of **11'** with CO<sub>2</sub> (a) and CS<sub>2</sub> (b) and the resulting intermediates (INT) for CO<sub>2</sub> (c) and CS<sub>2</sub> (d). Distances in Å.

## References

- [1] J. J. Weigand, K.-O. Feldmann, F. D. Henne, *J. Am. Chem. Soc.* **2010**, *132*, 16321.
- [2] O. Kühl, *Phosphorus-31 NMR spectroscopy*, Springer, Berlin, Heidelberg, **2008**.
- [3] Oxford Diffraction/Agilent Technologies UK Ltd, *CrysAlisPRO*, **2016**.
- [4] O. V. Dolomanov, L. J. Bourhis, R. J. Gildea, J. A. K. Howard, H. Puschmann, *J Appl Crystallogr* **2009**, *42*, 339.
- [5] G. M. Sheldrick, *Acta crystallographica. Section A, Foundations and advances* **2015**, *71*, 3.
- [6] G. M. Sheldrick, *Acta crystallographica. Section C, Structural chemistry* **2015**, *71*, 3.
- [7] A. L. Spek, *Acta Cryst.* **2015**, *71*, 9.
- [8] J. P. Perdew, *Phys. Rev. B*, 1986, *33*, 8822–8824.
- [9] A. D. Becke, *J. Chem. Phys.*, 1996, *104*, 1040–1046.
- [10] S. Grimme, J. Antony, S. Ehrlich and H. Krieg, *J. Chem. Phys.*, 2010, *132*, 154104,
- [11] F. Weigend and R. Ahlrichs, *Phys. Chem. Chem. Phys.*, 2005, *7*, 3297–3305.
- [12] F. Neese, F. Wennmohs, U. Becker and C. Riplinger, *J. Chem. Phys.*, 2020, *152*, 224108.
- [13] Y. Takano and K. N. Houk, *J. Chem. Theory Comput.*, 2005, *1*, 70–77.
- [14] G. Henkelman, B. P. Uberuaga and H. Jónsson, *J. Chem. Phys.*, 2000, *113*, 9901–9904

## Cartesian Coordinates

3a' +AP

|   |                  |                   |                   |
|---|------------------|-------------------|-------------------|
| P | 7.28117461870939 | 11.24418131840493 | 18.09130024605708 |
| N | 6.53182583083307 | 10.86298492024926 | 20.86810239679977 |
| N | 6.64155122953553 | 9.03721833319409  | 19.67628573200752 |
| N | 8.49388949039663 | 10.45461411048940 | 17.34236424253130 |
| N | 9.42218441321597 | 12.56203235463598 | 17.66614355505942 |
| C | 6.82951720843652 | 10.38164059763305 | 19.63812682901279 |
| C | 6.67833129465939 | 12.24420445584587 | 21.32176944908959 |
| H | 6.26343156692890 | 12.93259548460125 | 20.57722576130478 |
| C | 6.18991847669575 | 9.81564833825997  | 21.69264349382133 |
| C | 6.25461418619500 | 8.67278148884680  | 20.94566616542788 |
| C | 6.73298067600977 | 8.10810373714138  | 18.53914571478355 |
| H | 7.58912264258358 | 8.38225244696851  | 17.91298108330528 |
| C | 5.76718482833420 | 11.30508566810150 | 17.16836217362228 |
| C | 5.78974535296948 | 10.94882258552137 | 15.80995082756519 |
| H | 6.70591656424371 | 10.55995406470315 | 15.36477240655973 |
| C | 4.63074072228252 | 11.09647977268184 | 15.05025686053999 |
| H | 4.63305489045538 | 10.81266582561276 | 13.99776035248570 |
| C | 3.47023122955323 | 11.61064053223540 | 15.63650681442310 |
| H | 2.56843084694860 | 11.73138521741016 | 15.03544082667208 |
| C | 3.45204397024480 | 11.96593800357809 | 16.99037989451020 |
| H | 2.54205803510494 | 12.36309551977742 | 17.43988217947566 |
| C | 4.59768040316324 | 11.80752244848422 | 17.76476158178075 |
| H | 4.57760075190798 | 12.08474801113272 | 18.82034617841974 |
| C | 8.13353792866924 | 12.90204348812773 | 18.30427912899826 |
| H | 8.31046926533595 | 13.10113952912678 | 19.36920539816506 |
| C | 7.36835788412474 | 14.01727360676573 | 17.65083484918280 |
| C | 7.22634876428498 | 14.07063949190591 | 16.25692697429836 |
| H | 7.73956447751837 | 13.34371932643809 | 15.62459117682293 |
| C | 6.44120033470640 | 15.06314590391431 | 15.67323305061740 |
| H | 6.34120517667139 | 15.10744498971825 | 14.58860986632063 |
| C | 5.78949632384792 | 16.00468977452916 | 16.47597163974802 |
| H | 5.17814832294031 | 16.78179495663464 | 16.01682103400200 |
| C | 5.93911308114510 | 15.96375140798215 | 17.86400652617628 |
| H | 5.45365284460714 | 16.71313693940266 | 18.48949247635612 |
| C | 6.72956027285817 | 14.97329349543412 | 18.44985098712339 |
| H | 6.87042809038615 | 14.96389362454775 | 19.53321379421215 |

|   |                   |                   |                   |
|---|-------------------|-------------------|-------------------|
| C | 10.40530623232042 | 13.63728286886914 | 17.53595425039682 |
| C | 9.56381694818862  | 11.27581297231217 | 17.27415192045757 |
| C | 10.83388189915273 | 10.73659581924807 | 16.78315572733334 |
| C | 10.81507112968550 | 9.81693584128724  | 15.71948491601666 |
| H | 9.86625028619279  | 9.56111733873358  | 15.24885710065408 |
| C | 12.00528099308407 | 9.25700557971518  | 15.26531063185588 |
| H | 11.99331837077358 | 8.56441577405401  | 14.42368300591363 |
| C | 13.21442324991641 | 9.57954781566444  | 15.89098099115629 |
| H | 14.14495757927907 | 9.13527055453445  | 15.53632542971329 |
| C | 13.23252048861302 | 10.46441411747291 | 16.97323751057463 |
| H | 14.17229278073989 | 10.69784211066461 | 17.47372537717975 |
| C | 12.05009188265752 | 11.05183933062999 | 17.41558930928279 |
| H | 12.06601415693273 | 11.71373524423550 | 18.28051412952281 |
| H | 11.13503580776455 | 13.37193054618991 | 16.76592807264634 |
| H | 9.88330466587329  | 14.55437265490970 | 17.23583111292672 |
| H | 10.92359932269254 | 13.81367634109380 | 18.48968028343799 |
| H | 6.86448725659486  | 7.09677220835386  | 18.93551256314820 |
| H | 5.80632641778947  | 8.15547435973514  | 17.95281097425836 |
| H | 6.05201542662869  | 7.64167063365788  | 21.21084278501249 |
| H | 5.93066396027919  | 9.96593476878784  | 22.73413163098483 |
| H | 6.12359083121757  | 12.36228431074143 | 22.25751269444191 |
| H | 7.74417344770524  | 12.44552821755804 | 21.48766786602786 |
| C | 11.43467643906269 | 9.44935056105530  | 20.59567835425664 |
| C | 12.31644614472069 | 10.41916007054039 | 21.12693557831865 |
| C | 11.80267846274799 | 11.73169474071820 | 21.25617183059450 |
| C | 10.49716612268456 | 11.98774842080086 | 20.87216454471395 |
| C | 10.14989740461369 | 9.82186651909926  | 20.24192132824597 |
| H | 11.76021660210002 | 8.41747850969486  | 20.45915317950601 |
| H | 12.41818867036862 | 12.53393623488798 | 21.66561372613021 |
| H | 10.10754134218731 | 13.00531187042136 | 20.98572223002998 |
| H | 9.48012997497880  | 9.07021657704127  | 19.81698169699161 |
| N | 13.59364888426082 | 10.11581035437587 | 21.46656159292707 |
| N | 9.64723200388246  | 11.06913171887649 | 20.36346948520524 |
| H | 14.17360158938820 | 10.78957309537170 | 21.95241757859446 |
| H | 13.91127422847069 | 9.15393041862813  | 21.47373923426098 |

TSl Y=H

|   |                   |                   |                   |
|---|-------------------|-------------------|-------------------|
| P | -1.08486747660871 | -0.41443548249715 | -0.56976756382491 |
| N | -1.96507103889241 | -0.44712372875108 | 2.19328307417978  |
| N | -1.70250802327932 | -2.42387162226143 | 1.30480488905666  |
| N | 0.15101890522537  | -1.31808788662112 | -1.18036055145394 |
| N | 1.03261996216568  | 0.81077211892141  | -1.18574774920005 |
| C | -1.61247588626864 | -1.09238051078634 | 1.05296482818370  |
| C | -2.06940005206995 | 1.00144713121120  | 2.39339909276691  |
| H | -2.25164103288864 | 1.50343846141565  | 1.43808082318272  |
| C | -2.25820966291707 | -1.37635727730366 | 3.16790220753534  |
| C | -2.09534836322410 | -2.61323500419027 | 2.61012594346550  |
| C | -1.51799473615815 | -3.50871906243516 | 0.32728385583540  |
| H | -0.69306639022518 | -3.25023506475248 | -0.34612562545118 |
| C | -2.57141594295400 | -0.61567140292517 | -1.54889253213078 |
| C | -2.41697028235846 | -0.81039437138839 | -2.93276305754065 |
| H | -1.41976838260760 | -0.91547117273366 | -3.36137689458534 |
| C | -3.54765503019698 | -0.88932331332035 | -3.74402713084905 |
| H | -3.43547656259458 | -1.04996782188634 | -4.81644684833052 |
| C | -4.82305688749212 | -0.76665699139222 | -3.18291357237764 |
| H | -5.70430960025622 | -0.82801620564490 | -3.82213379721504 |
| C | -4.97712796848126 | -0.56998696453352 | -1.80589983038282 |
| H | -5.97424926633592 | -0.48037560117462 | -1.37447907391116 |
| C | -3.85372148695611 | -0.49278249697032 | -0.98577793354989 |
| H | -3.98182003788773 | -0.33551219115347 | 0.08710367630701  |
| C | -0.11544690351501 | 1.06468299221254  | -0.29457175295350 |
| H | 0.56000374224340  | 0.70667904565826  | 0.98081147640589  |
| C | -0.67988619753093 | 2.44119909143167  | -0.24701972107058 |
| C | -1.89690196659390 | 2.76352818326773  | -0.87329409877996 |
| H | -2.41598539230568 | 2.01347303048328  | -1.47036489567478 |
| C | -2.44359381596875 | 4.04429180576210  | -0.76019502976197 |
| H | -3.38915961950909 | 4.27322622671741  | -1.25269455255548 |
| C | -1.77174939467611 | 5.03301390706923  | -0.04011585055166 |
| H | -2.19319822023520 | 6.03507217326142  | 0.04077893145675  |
| C | -0.54656885453328 | 4.73573118549757  | 0.56569175026418  |
| H | -0.00855300060612 | 5.50831909404709  | 1.11604543752084  |
| C | -0.01300225255328 | 3.45152257910960  | 0.47095000202491  |
| H | 0.94698395015959  | 3.23538958988029  | 0.94322595696512  |
| C | 1.80206819940093  | 1.91990459813321  | -1.74653887782119 |
| C | 1.17756153059882  | -0.49462234700776 | -1.49993543642394 |
| C | 2.37725288614043  | -1.04831724304910 | -2.13216909383920 |
| C | 2.23540656863992  | -2.10997044465030 | -3.04404944196816 |
| H | 1.23751323210713  | -2.47701488455737 | -3.28237092309895 |

|   |                   |                   |                   |
|---|-------------------|-------------------|-------------------|
| C | 3.36011624682313  | -2.67208197546018 | -3.64113425000022 |
| H | 3.24457346617386  | -3.48150192368524 | -4.36217570556255 |
| C | 4.63621547619358  | -2.19859204415164 | -3.31838490449110 |
| H | 5.51581616397399  | -2.64086258505496 | -3.78694958715236 |
| C | 4.78659051858786  | -1.16284728306815 | -2.39122525634993 |
| H | 5.78228863517159  | -0.80617914716892 | -2.12689695988201 |
| C | 3.66452620795411  | -0.58539866178714 | -1.80132980808260 |
| H | 3.79072557195932  | 0.20545889289823  | -1.06165763203866 |
| H | 2.40953497601909  | 1.54768093303679  | -2.57613328088698 |
| H | 1.10770130722039  | 2.68391102427460  | -2.11839398170884 |
| H | 2.45606025917051  | 2.38092160370944  | -0.99359160333222 |
| H | -1.29078863026471 | -4.42802686837287 | 0.87560731194817  |
| H | -2.44342256665076 | -3.63975331109706 | -0.24790244413752 |
| H | -2.23498164576731 | -3.60246931861464 | 3.03038423022059  |
| H | -2.56644756747392 | -1.08463770203279 | 4.16509680794887  |
| H | -2.90768694961036 | 1.19607151100234  | 3.07061375555397  |
| H | -1.14321298467128 | 1.38703806587999  | 2.83377833868539  |
| C | 2.79094734092311  | -1.33501411854500 | 2.78001240389255  |
| C | 3.23074310294397  | -0.46816820040961 | 3.81653087616629  |
| C | 2.65997182691203  | 0.83230888773615  | 3.85246772570844  |
| C | 1.73589120960358  | 1.19563083939938  | 2.89938238252765  |
| C | 1.85647372446753  | -0.89156360204302 | 1.87243397824651  |
| H | 3.19557744597221  | -2.34314132680355 | 2.68946893473012  |
| H | 2.95350723396426  | 1.54840034398529  | 4.62008861896899  |
| H | 1.29577735250943  | 2.19353766546953  | 2.89459742211363  |
| H | 1.50623848629493  | -1.52813884492169 | 1.05793627487019  |
| N | 4.14588380557666  | -0.85957942704513 | 4.72283703254730  |
| N | 1.32676154695507  | 0.35380021855654  | 1.92243318286256  |
| H | 4.47397858702852  | -0.23093568894063 | 5.44723327263436  |
| H | 4.57041060403890  | -1.77903007883954 | 4.68245275415103  |

INT1 Y=H

|   |                   |                   |                   |
|---|-------------------|-------------------|-------------------|
| P | 7.73004795152998  | 11.38803664608723 | 17.82446245342653 |
| N | 7.02659439548042  | 11.72269426351638 | 20.65644184491384 |
| N | 6.94344323646966  | 9.65633559997917  | 19.95521450435027 |
| N | 9.24789669898560  | 10.84489937757616 | 17.41206872539490 |
| N | 9.47511557754787  | 13.12043675720549 | 17.30210865222360 |
| C | 7.08175555699084  | 10.95361556471625 | 19.52767419571356 |
| C | 7.14131297223607  | 13.17826361937702 | 20.74886357689292 |
| H | 6.32575141508217  | 13.66220630745713 | 20.19936438377972 |
| C | 6.81313555215269  | 10.92271317898576 | 21.75536247528578 |
| C | 6.76776515520412  | 9.63074880217990  | 21.32000794170798 |
| C | 6.93894291413620  | 8.44403061381024  | 19.13500824448099 |
| H | 7.73415173453106  | 8.49473625825867  | 18.38557957025589 |
| C | 6.53613975084075  | 10.49881345241172 | 16.80714207097750 |
| C | 6.94484894703357  | 10.01516705370588 | 15.55343015875392 |
| H | 7.9836935025578   | 10.13150768599612 | 15.24226527558420 |
| C | 6.01640285676708  | 9.40726580900312  | 14.70839958429867 |
| H | 6.33203026100530  | 9.03132507587578  | 13.73465753107702 |
| C | 4.67746504836690  | 9.29798667562604  | 15.09856856875095 |
| H | 3.95173628726574  | 8.83309196082008  | 14.43062838145022 |
| C | 4.26243780678409  | 9.80101649567037  | 16.33598621847048 |
| H | 3.21511737271289  | 9.73147687094755  | 16.63146205592930 |
| C | 5.18738548732156  | 10.40235444730027 | 17.18842037038048 |
| H | 4.85549634523590  | 10.80888295145242 | 18.14659748143480 |
| C | 8.12302522764043  | 13.07062370574090 | 17.71489067730160 |
| H | 9.93161829585829  | 9.34945481132962  | 17.38613838999709 |
| C | 7.20430794089538  | 14.18756573494052 | 17.82979884851603 |
| C | 5.83310494604085  | 13.96426964529226 | 17.56542023752774 |
| H | 5.51725166845756  | 13.01777710699703 | 17.12634089879365 |
| C | 4.87899089780628  | 14.95509501472690 | 17.79748193110477 |
| H | 3.82954309679758  | 14.75365641651571 | 17.57911629138120 |
| C | 5.26827591969999  | 16.20862877878067 | 18.27174182202324 |
| H | 4.52734163669992  | 16.99005847004240 | 18.43950637100238 |
| C | 6.62358135908054  | 16.45520496387398 | 18.52043899324584 |
| H | 6.93838699762865  | 17.43019775950895 | 18.89415641227093 |
| C | 7.57745786430533  | 15.46142202290079 | 18.31695994052183 |
| H | 8.61523062974185  | 15.67108467443576 | 18.57353512764281 |
| C | 10.10006734991239 | 14.35440753894889 | 16.81066943342169 |
| C | 10.06696341619272 | 11.90904194303997 | 17.21122051727027 |
| C | 11.49191640772750 | 11.72361739728600 | 16.91153089296674 |
| C | 11.87355273633108 | 10.88585936446418 | 15.84917617315837 |
| H | 11.10602666112310 | 10.43654940027199 | 15.21763621683511 |
| C | 13.22326106930194 | 10.66473727912186 | 15.58043928166078 |
| H | 13.51294384089048 | 10.03288786912404 | 14.74035849960509 |
| C | 14.20354903471373 | 11.27220061584316 | 16.37138509957652 |
| H | 15.25919855587927 | 11.10453607677218 | 16.15660899402594 |
| C | 13.83144289940054 | 12.10824602012235 | 17.42861624709364 |

|   |                   |                   |                    |
|---|-------------------|-------------------|--------------------|
| H | 14.59482521937649 | 12.58493270841478 | 18.04398191885059  |
| C | 12.48240468132235 | 12.33688581071693 | 17.69811750360415  |
| H | 12.19328103213150 | 12.98052688628250 | 18.530222713360035 |
| H | 10.92307260433759 | 14.08920645243921 | 16.14122144411193  |
| H | 9.34870067078274  | 14.93285402780737 | 16.26119034051669  |
| H | 10.48878863057559 | 14.96359529036812 | 17.63594266996925  |
| H | 7.11939104772078  | 7.58978977420618  | 19.79519448478780  |
| H | 5.97525064994583  | 8.32543385497965  | 18.62542906800932  |
| H | 6.62872388375871  | 8.70551757592344  | 21.86661504505421  |
| H | 6.71083953058894  | 11.33518052406999 | 22.75212666054547  |
| H | 7.09432591577743  | 13.45226678669151 | 21.80675018017843  |
| H | 8.09625541907275  | 13.49432213622805 | 20.31688669029592  |
| C | 10.50008837016507 | 6.14070915160214  | 16.57639749040242  |
| C | 11.74921276852201 | 5.94014638660076  | 17.22826313500103  |
| C | 12.29677697402811 | 7.04156496493834  | 17.94336715086390  |
| C | 11.61754404932204 | 8.23334021462643  | 17.98434350651209  |
| C | 9.87916248483993  | 7.36203074169405  | 16.66127440988735  |
| H | 10.03506152077541 | 5.33865514963347  | 16.00419456915741  |
| H | 13.25486645346492 | 6.95209123992972  | 18.45395031808439  |
| H | 12.00126713791148 | 9.11027692290580  | 18.50387937700928  |
| H | 8.92963046025084  | 7.56822993016317  | 16.16716738567670  |
| N | 12.38725695636635 | 4.75931745335632  | 17.16727806262902  |
| N | 10.42420633863959 | 8.38563313142565  | 17.36091265613069  |
| H | 13.28163687013180 | 4.61786460787270  | 17.62360999975868  |
| H | 12.00507919180589 | 3.97651416907949  | 16.64826773687762  |

TS2 Y=H

|   |                   |                   |                   |
|---|-------------------|-------------------|-------------------|
| P | -1.06186416391556 | 0.57326759106178  | -0.10488466300530 |
| N | -2.20455047474501 | -0.63236459437555 | 2.67967777935148  |
| N | -2.27664852607263 | -2.25546390269976 | 1.27091388072001  |
| N | 0.43514778784570  | -0.19446812245754 | -0.31790304382492 |
| N | 0.83213123497394  | 1.85794406102497  | -1.30570480798034 |
| C | -1.61428815805349 | -1.08898078319237 | 1.53497294868711  |
| C | -1.79948021352671 | 0.58307154896388  | 3.38047314245223  |
| H | -2.68685021860622 | 1.12260932717629  | 3.73215783459049  |
| C | -3.20184003962989 | -1.48628550907852 | 3.11497493624789  |
| C | -3.25107252750718 | -2.51369674352468 | 2.21730168884414  |
| C | -2.03491722100210 | -3.09010617369328 | 0.09838628743767  |
| H | -1.11798479880717 | -2.74693627848138 | -0.39042661944796 |
| C | -2.43500401040463 | -0.07278350193388 | -1.09599893807287 |
| C | -2.21362614800804 | -0.55223854309905 | -2.39568728642930 |
| H | -1.20596509213325 | -0.56455233987172 | -2.81334033941130 |
| C | -3.29013072150452 | -1.01881194500173 | -3.15126657866529 |
| H | -3.12079433454306 | -1.39832247827774 | -4.15945272239757 |
| C | -4.58359381714752 | -0.99036367646041 | -2.61974090221439 |
| H | -5.42378944741045 | -1.34685316357527 | -3.21640487711285 |
| C | -4.80380754464048 | -0.50325637873250 | -1.32718130500686 |
| H | -5.81403885490877 | -0.47319412562425 | -0.91816592708500 |
| C | -3.73035976838709 | -0.05036353587147 | -0.55968915063004 |
| H | -3.90156791974324 | 0.32543928416060  | 0.45007347112589  |
| C | -0.51122873757821 | 1.97693418717650  | -1.12476095838465 |
| H | 0.53505308573479  | -1.45770129709047 | 1.50608011831033  |
| C | -1.24950047736257 | 3.19077785450021  | -1.44532960742718 |
| C | -2.48511059838156 | 3.09689980958824  | -2.11989743489535 |
| H | -2.84945519271275 | 2.12457875745330  | -2.44540390429292 |
| C | -3.21367649201016 | 4.24721500096627  | -2.41040660376893 |
| H | -4.15430664823802 | 4.16665269944063  | -2.95542805466212 |
| C | -2.74144353452670 | 5.50019600475596  | -2.00933775074191 |
| H | -3.31876561789021 | 6.39787778319098  | -2.23234346119721 |
| C | -1.52815712509207 | 5.60407427082554  | -1.32019617795781 |
| H | -1.16638080059230 | 6.57910811333347  | -0.99325004542513 |
| C | -0.78165524340354 | 4.46251413393879  | -1.04795980020259 |
| H | 0.14845249457665  | 4.55140320813260  | -0.48581540875714 |
| C | 1.65938352262810  | 2.82187348936460  | -2.05134699024474 |
| C | 1.31573737751655  | 0.60622467192391  | -0.85687575248424 |
| C | 2.73880038893212  | 0.23328934658551  | -0.89900155600597 |
| C | 3.06253454244202  | -1.09444120224190 | -1.23196313919938 |
| H | 2.26703790962855  | -1.77181988602616 | -1.54222709083159 |
| C | 4.38440759851614  | -1.52819498248478 | -1.18262247683766 |
| H | 4.63020301445514  | -2.55060614932556 | -1.47113123428419 |
| C | 5.39708302874857  | -0.64877595371941 | -0.78479582749361 |
| H | 6.43422297115262  | -0.98486256306467 | -0.76002246384889 |
| C | 5.08187055442242  | 0.66828920077270  | -0.43952041128149 |
| H | 5.86853021331576  | 1.35684189409686  | -0.12961040996967 |
| C | 3.76081314802173  | 1.11179343024551  | -0.49908729776527 |
| H | 3.52854189633431  | 2.13570794285049  | -0.20628333788659 |
| H | 2.42803616768829  | 2.27019182713490  | -2.60204641307054 |
| H | 1.01363805695773  | 3.35924589239995  | -2.75311359730560 |

|   |                   |                   |                   |
|---|-------------------|-------------------|-------------------|
| H | 2.14077154497404  | 3.54678634949479  | -1.38427258583357 |
| H | -1.92824570558500 | -4.13921431551992 | 0.40250788501235  |
| H | -2.86950870880245 | -3.00574443124539 | -0.60983925095341 |
| H | -3.88604462454558 | -3.39185882891979 | 2.18571344664162  |
| H | -3.77852463046460 | -1.30796221400262 | 4.01554994429418  |
| H | -1.16382990497220 | 0.33853169627839  | 4.24173872800114  |
| H | -1.24497315867362 | 1.21900889023350  | 2.68126078191333  |
| C | 2.88407538522091  | -3.68058049332721 | 2.22401922538976  |
| C | 3.95187628455520  | -2.80004388283300 | 2.55210044874488  |
| C | 3.68451562611730  | -1.40412975859190 | 2.50835134746768  |
| C | 2.43750777755220  | -0.96075546780846 | 2.15265702332215  |
| C | 1.65873014726505  | -3.16804675497838 | 1.88065107130349  |
| H | 3.02561799979270  | -4.76047820468644 | 2.24373889990320  |
| H | 4.46130333692220  | -0.67987469895457 | 2.74808603977863  |
| H | 2.18586802886378  | 0.09460673951025  | 2.09187096778862  |
| H | 0.81303219988230  | -3.80034328427157 | 1.61885925643721  |
| N | 5.16631812198654  | -3.26887396812552 | 2.88455765990123  |
| N | 1.44420652034590  | -1.83160277165707 | 1.85099463554709  |
| H | 5.91767088303859  | -2.64380330079856 | 3.15408851402486  |
| H | 5.34986235015811  | -4.26419880095678 | 2.94797824105467  |

INT2 Y=H

|   |                   |                   |                   |
|---|-------------------|-------------------|-------------------|
| P | 7.55655646149031  | 11.97872525971193 | 18.27543386562716 |
| N | 8.39689855517827  | 10.58696741232558 | 17.80747340539867 |
| N | 9.54075276189096  | 12.28891081076235 | 16.71828988415186 |
| C | 5.86347052824624  | 11.88298475767999 | 17.62807473900555 |
| C | 5.58086585175974  | 11.31772813846618 | 16.37413386577775 |
| H | 6.38325410926270  | 10.90271981565463 | 15.76376073574778 |
| C | 4.26366935835485  | 11.28288019501376 | 15.92202735081669 |
| H | 4.03604851992790  | 10.84042620447641 | 14.95165910930170 |
| C | 3.23533390378008  | 11.81424787483238 | 16.70962126232288 |
| H | 2.20681791877314  | 11.78518816871267 | 16.34831959043681 |
| C | 3.51826465213144  | 12.37132199370923 | 17.95828707896558 |
| H | 2.71418748444697  | 12.77382881625613 | 18.57484720946087 |
| C | 4.83349895550827  | 12.40000550238864 | 18.42649223609439 |
| H | 5.06167281736551  | 12.82065873566125 | 19.40682146431493 |
| C | 8.51386175858325  | 13.02924460048702 | 17.15866647641095 |
| C | 8.33126317101406  | 14.44646447194709 | 16.89895235286624 |
| C | 7.04064653496051  | 14.91497528878862 | 16.57695698508384 |
| H | 6.21554666412025  | 14.20936526249567 | 16.49072816643306 |
| C | 6.83130818191317  | 16.26912760144178 | 16.33292283299876 |
| H | 5.83594759651835  | 16.62167068968316 | 16.06206152359236 |
| C | 7.89264079896873  | 17.17319200732240 | 16.43652923942406 |
| H | 7.72289326841589  | 18.23486850439949 | 16.25410612516673 |
| C | 9.16994572303441  | 16.72021108078682 | 16.78425116820170 |
| H | 9.99184708019766  | 17.42877303072933 | 16.88975651841382 |
| C | 9.39579369964028  | 15.36604189514399 | 17.00789089823280 |
| H | 10.37140175918170 | 15.01505427789500 | 17.34271813212110 |
| C | 10.58657654240699 | 12.79142054576013 | 15.82000862121304 |
| C | 9.45656657475660  | 10.90742240508183 | 17.13126697210217 |
| C | 10.51199527966571 | 9.94387476608948  | 16.79052137777351 |
| C | 10.12105142127769 | 8.65549891825858  | 16.38645150791998 |
| H | 9.05912563437221  | 8.42724906974379  | 16.29569997144944 |
| C | 11.08408724383368 | 7.68920386127025  | 16.10920771534552 |
| H | 10.77529005116397 | 6.69572977189617  | 15.78323146798376 |
| C | 12.44205481223931 | 7.98969148686262  | 16.25357388116023 |
| H | 13.19450547587701 | 7.22995512094838  | 16.04018678982111 |
| C | 12.83581093317304 | 9.26056825763696  | 16.68062104980048 |
| H | 13.89290250548535 | 9.49023426606683  | 16.81605880574920 |
| C | 11.87784684349858 | 10.23801791107207 | 16.94440167735533 |
| H | 12.19655077947807 | 11.21624352042298 | 17.30428232145020 |
| H | 10.91765022863145 | 11.97163886756701 | 15.17587280812807 |
| H | 10.16775896935023 | 13.60379291883159 | 15.21717009792016 |
| H | 11.43696883743171 | 13.17133790600583 | 16.39911731920911 |
| C | 9.74305683358958  | 11.74849701761137 | 21.11851570677628 |
| C | 8.84047236878537  | 12.60841472065883 | 21.77903637557452 |
| C | 8.73449686600148  | 13.92264187665147 | 21.27535865598282 |
| C | 9.49373757755377  | 14.28875647942837 | 20.17390251119565 |
| C | 10.45795466781139 | 12.22715390635302 | 20.02999006122257 |
| H | 9.88503790461628  | 10.72116939328711 | 21.45721521721146 |
| H | 8.06944815390887  | 14.64795132022936 | 21.74731110476294 |
| H | 9.40917765467075  | 15.30564233705712 | 19.78124546057852 |
| H | 11.16865479644494 | 11.56244942713881 | 19.53055476442159 |
| N | 8.07723846626289  | 12.17749016187409 | 22.82856209071817 |
| N | 10.34789485383294 | 13.47198479094153 | 19.52523026205992 |
| H | 7.61214773079126  | 12.86295610598537 | 23.41225378691834 |
| H | 8.31925501850132  | 11.30588383249188 | 23.28540127181961 |

TS3 Y=H

|   |                   |                   |                   |
|---|-------------------|-------------------|-------------------|
| P | -1.40567570231167 | -1.01588884885558 | 0.39727761924158  |
| N | -0.47881895054411 | -2.27595344337157 | -0.27782401337799 |
| N | 0.81182161517497  | -0.39660385415205 | -0.75337133003639 |
| C | -2.81172382235041 | -0.70368037666820 | -0.72046997889635 |
| C | -2.76736457344517 | -0.98970698055306 | -2.09184527354613 |
| H | -1.89603190701080 | -1.48393181341579 | -2.52274379172224 |
| C | -3.85159705885156 | -0.64780327066349 | -2.89848933391550 |
| H | -3.82616501434997 | -0.87451303750346 | -3.96492605669598 |
| H | -5.81274452311037 | 0.25416628895220  | -2.98100371679535 |
| C | -4.96887289258286 | -0.01345094552994 | -2.34412319342085 |
| C | -5.01267941147142 | 0.26692877287216  | -0.97737647168509 |
| H | -5.88922653381407 | 0.74857086777423  | -0.54288583150664 |
| C | -3.93821932315891 | -0.08705297920353 | -0.15925757277435 |
| H | -3.97570127074210 | 0.11391022259143  | 0.91251100399073  |
| C | -0.22541758961466 | 0.24385089740497  | -0.19443939993538 |
| C | -0.61941441637099 | 1.62772562558594  | -0.40925701240947 |
| C | -0.48111233710318 | 2.21734276033816  | -1.68129580294959 |
| H | 0.00091079712841  | 1.66869603056594  | -2.49037728528794 |
| C | -1.02943743675955 | 3.47278203583967  | -1.93492080467465 |
| H | -0.92733915120858 | 3.91345142392892  | -2.92686980768485 |
| C | -1.71952093782068 | 4.15588846279800  | -0.93094254389328 |
| H | -2.14145940149738 | 5.14093948701638  | -1.13227099006828 |
| C | -1.88019589928293 | 3.56789884762296  | 0.32775128228405  |
| H | -2.42784478812694 | 4.09284293484353  | 1.11085460953129  |
| C | -1.34541759474545 | 2.31053646748678  | 0.58564852829285  |
| H | -1.45731934133624 | 1.85412912722769  | 1.56848927453233  |
| C | 2.05077742052308  | 0.26971688430068  | -1.16257354684823 |
| C | 0.65484504528739  | -1.83374004304228 | -0.71632144039720 |
| C | 1.71139751850029  | -2.73612510670760 | -1.19705026640069 |
| C | 1.31959437124384  | -3.79905443469599 | -2.02924333396528 |
| H | 0.27303783605259  | -3.88535646539441 | -2.32110324959402 |
| C | 2.25906998207076  | -4.72975242799582 | -2.46299972086737 |
| H | 1.95004654017863  | -5.54584865967550 | -3.11646275873693 |
| C | 3.59117078091627  | -4.62354785403743 | -2.05196615332716 |
| H | 4.32478064679781  | -5.35800848736175 | -2.38530342807130 |
| C | 3.98045304061013  | -3.58475753371357 | -1.20259164377308 |
| H | 5.01280648377495  | -3.51631805083515 | -0.85907524498686 |
| C | 3.04826285074668  | -2.63904900046501 | -0.77835134712803 |
| H | 3.35627216390418  | -1.85789299438448 | -0.08419272625919 |
| H | 2.46550283552807  | -0.22437085123322 | -2.04680445580635 |
| H | 1.83876477421030  | 1.31793824315453  | -1.38410863455825 |
| H | 2.77656343561131  | 0.22534180605109  | -0.33991852993193 |
| C | 1.12638173643394  | 0.10292479592831  | 4.32546225772694  |
| C | 1.73273228181336  | 1.35240339314080  | 4.59108063830119  |
| C | 1.87066814419754  | 2.24065925307935  | 3.49861179648809  |
| C | 1.40949057384785  | 1.85527819682574  | 2.25173065418450  |
| C | 0.70112884142154  | -0.18333617824599 | 3.03879779019859  |
| H | 0.98487338476916  | -0.62877354804417 | 5.12186320984929  |
| H | 2.32758853052399  | 3.22208998135404  | 3.63230383661279  |
| H | 1.48827639245136  | 2.54223530251528  | 1.40503391645502  |
| H | 0.21051061013058  | -1.13786577276925 | 2.82582063239689  |
| N | 2.15808269999279  | 1.68692168255833  | 5.83629805687258  |
| N | 0.83235468749881  | 0.66537021604345  | 2.00490768432326  |
| H | 2.57844095028702  | 2.58809340362691  | 6.02159487848366  |
| H | 2.04269290267061  | 1.05373954709083  | 6.61666902216253  |

4a'

|   |                   |                   |                   |
|---|-------------------|-------------------|-------------------|
| P | 12.01200730865781 | -1.06782664856202 | 20.53012162800442 |
| N | 13.29095826303323 | -0.77914051726896 | 21.60783758941929 |
| N | 11.56280728780719 | 0.15112805967165  | 22.87160886986881 |
| C | 12.15537984524810 | 0.30026309761763  | 19.34171913338142 |
| C | 13.08359507488729 | 1.34320285099149  | 19.47568126953827 |
| H | 13.78052514549736 | 1.34065883863115  | 20.31418138650321 |
| C | 13.11261992193304 | 2.37214435348446  | 18.53456426951620 |
| H | 13.83938893297823 | 3.17948980764823  | 18.63366212220376 |
| H | 12.23663628682910 | 3.17796456923345  | 16.73093701321378 |
| C | 12.21259898876917 | 2.37022317499344  | 17.46346737413838 |
| C | 11.29489083189994 | 1.32613590989097  | 17.31871968051625 |
| H | 10.60275711471879 | 1.31682405741704  | 16.47603066307667 |
| C | 11.27617529627749 | 0.28607263616415  | 18.24718851726998 |
| H | 10.57251844939107 | -0.54051007023117 | 18.12320159203128 |
| C | 10.70187797047395 | -0.42848869625794 | 21.87943772730764 |
| C | 9.57253362110323  | 0.45346815171483  | 21.40713319689318 |
| C | 9.89000308224689  | 1.70917182060944  | 20.85911659148235 |
| H | 10.92921801349849 | 2.02642876498095  | 20.79522810004098 |
| C | 8.88910038515409  | 2.55819821728939  | 20.39415217369194 |

|   |                   |                   |                   |
|---|-------------------|-------------------|-------------------|
| H | 9.16240747290369  | 3.52514191700916  | 19.97121635165123 |
| C | 7.54791816817175  | 2.17423053965189  | 20.46496393462473 |
| H | 6.76502398361363  | 2.83632447328758  | 20.09437624752190 |
| C | 7.21872345898301  | 0.94094474851100  | 21.02627491731038 |
| H | 6.17488479971942  | 0.63623187277980  | 21.10789335259423 |
| C | 8.22082351723056  | 0.09030193235633  | 21.49893187588038 |
| H | 7.92171607607247  | -0.85414860753875 | 21.95195629429094 |
| C | 11.09728337889509 | 1.20262356413485  | 23.78148086644172 |
| C | 12.91733941290861 | -0.19987201156039 | 22.70850307647119 |
| C | 13.89699968782243 | 0.06132348408932  | 23.78142235822504 |
| C | 15.22344821756684 | 0.33884882683414  | 23.41053330516845 |
| H | 15.47241433087593 | 0.38694704953530  | 22.35085928700596 |
| C | 16.20004029494224 | 0.52986133411869  | 24.38351954252256 |
| H | 17.22475759967530 | 0.75329108560978  | 24.08544390233749 |
| C | 15.87023528136925 | 0.42719408571908  | 25.73871368940221 |
| H | 16.63728629744442 | 0.57131053368124  | 26.50020430703569 |
| C | 14.55831712350025 | 0.13118975525785  | 26.11645918195192 |
| H | 14.30137510978809 | 0.03350559224477  | 27.17158848121833 |
| C | 13.5748459561324  | -0.04520429730617 | 25.14406055414866 |
| H | 12.55817417186203 | -0.28729416053276 | 25.45508860997264 |
| H | 11.96034953013235 | 1.75915299634258  | 24.15709564126496 |
| H | 10.44051935969246 | 1.89513316525371  | 23.24230062692257 |
| H | 10.53542152619769 | 0.79895218021289  | 24.63893455101584 |
| C | 9.09416752581617  | -3.84931008821537 | 21.89545476402034 |
| C | 9.19013915538232  | -4.25726810716968 | 23.25051811981044 |
| C | 9.80029325649528  | -3.34770596551221 | 24.15102329528622 |
| C | 10.25986486568791 | -2.13511281884504 | 23.69833733055647 |
| C | 9.58664649848736  | -2.62885072870432 | 21.51010209711995 |
| H | 8.64692517038013  | -4.49954022828700 | 21.14442628790865 |
| H | 9.91990816464413  | -3.59828384689300 | 25.20430002553057 |
| H | 10.74876351642089 | -1.41972168737883 | 24.35245618518653 |
| H | 9.55123717969004  | -2.29115770219096 | 20.47755477247451 |
| N | 8.72669676955867  | -5.45448331349200 | 23.65931279948839 |
| N | 10.15108177714844 | -1.76780035827875 | 22.39976493790918 |
| H | 8.81411688612949  | -5.75224184127504 | 24.62356263735564 |
| H | 8.31065906877379  | -6.10780905146787 | 23.00637201427604 |

TS4 Y=H

|   |                   |                   |                   |
|---|-------------------|-------------------|-------------------|
| P | 0.28003367330037  | -0.94544753636308 | -1.24142295304942 |
| N | 1.59352332951863  | -0.87775632920422 | -0.15162415229984 |
| N | 0.35221104114558  | 0.95724488236862  | 0.50697305853947  |
| C | 0.75719707413601  | 0.70410595663161  | -2.31514940491670 |
| C | 1.87704613158031  | 1.52204662345978  | -2.14232580194010 |
| H | 2.45543503216208  | 1.48995882280162  | -1.21815054302278 |
| C | 2.26853785212128  | 2.38410650801751  | -3.16833106983133 |
| H | 3.15237317053530  | 3.00986695987858  | -3.03965662391130 |
| H | 1.83642789273126  | 3.12526496909810  | -5.1509663235128  |
| C | 1.52968282669578  | 2.44782826412345  | -4.35350309603615 |
| C | 0.39766221869731  | 1.64272395462980  | -4.51695633538324 |
| H | -0.17860066528675 | 1.68475957974175  | -5.44193792679567 |
| C | 0.00572718579703  | 0.77706979595139  | -3.49866324641047 |
| H | -0.87263796567077 | 0.14254743365359  | -3.63197454729455 |
| C | -0.40238897529658 | 0.57600148190584  | -0.56730283764918 |
| C | -1.69013543809849 | 1.22463698755292  | -0.87668314912089 |
| C | -1.77461453473761 | 2.48345405095912  | -1.49218962262883 |
| H | -0.86395626692884 | 3.00311722836746  | -1.79113477735986 |
| C | -3.02098515747375 | 3.04229640671491  | -1.76622488291827 |
| H | -3.08057658870184 | 4.01288002027437  | -2.25937797924177 |
| C | -4.19044743648436 | 2.35741023495343  | -1.42215632251509 |
| H | -5.16398917361664 | 2.79692060979622  | -1.64121606236180 |
| C | -4.11069208243945 | 1.10665624949303  | -0.80714807360134 |
| H | -5.02019817289308 | 0.56677388984717  | -0.54203091299155 |
| C | -2.86569695992878 | 0.53501400946888  | -0.54022731195322 |
| H | -2.79872443526905 | -0.44201700723714 | -0.06113680329979 |
| C | 0.16552680092150  | 2.24071353535236  | 1.19760790511456  |
| C | 1.46247936546154  | 0.09304824341955  | 0.69908939051522  |
| C | 2.42758842163306  | 0.30356158990767  | 1.78859090841442  |
| C | 3.78652661831588  | 0.08069804399111  | 1.51001041085014  |
| H | 4.07921291945125  | -0.19914566153033 | 0.49801392819277  |
| C | 4.73560440576494  | 0.20996521232500  | 2.52004287830348  |
| H | 5.79026794851486  | 0.04881567827586  | 2.29567841267123  |
| C | 4.33550804753431  | 0.53839596813860  | 3.81908445149544  |
| H | 5.07950888041427  | 0.63441474581514  | 4.61035900068059  |
| C | 2.98222262310666  | 0.73441137592136  | 4.10729431722358  |
| H | 2.66745428325632  | 0.96869146650771  | 5.12438170114923  |
| C | 2.02837581465464  | 0.62438417510317  | 3.09642545093382  |
| H | 0.97250365425087  | 0.75246251193380  | 3.33619573035725  |
| H | 1.12131422159506  | 2.55895608742376  | 1.62325446950214  |

|   |                   |                   |                   |
|---|-------------------|-------------------|-------------------|
| H | -0.18127567829818 | 2.99063122740210  | 0.48129969450041  |
| H | -0.57942990781026 | 2.14541972087792  | 1.99819960848689  |
| C | -2.46899526402399 | -4.15405787365564 | 0.23036393966216  |
| C | -1.97139675179825 | -4.70593943976780 | 1.43433253985090  |
| C | -0.81847984872710 | -4.10193953056519 | 1.98891252208390  |
| C | -0.24206083728323 | -3.02010631271062 | 1.34816389355389  |
| C | -1.81698572557439 | -3.07501813191314 | -0.33437164527708 |
| H | -3.34534530517034 | -4.58039520354406 | -0.25933845242862 |
| H | -0.37592399228649 | -4.48810601757790 | 2.90783946721684  |
| H | 0.66178591931202  | -2.55296231121453 | 1.74400369774085  |
| H | -2.16420491964419 | -2.65068777038437 | -1.28139826104936 |
| N | -2.58026672134142 | -5.76144223723872 | 2.03382936242154  |
| N | -0.72932179134917 | -2.49482731539799 | 0.20742629588479  |
| H | -2.15717264414644 | -6.21702963295530 | 2.83248245148718  |
| H | -3.33723411232870 | -6.25037619082422 | 1.57274694080677  |

5a'

|   |                   |                   |                   |
|---|-------------------|-------------------|-------------------|
| P | 0.71548755382213  | -1.19519457946167 | -1.25750105941891 |
| N | 1.83459597366339  | -1.06730445302522 | -0.02226890224927 |
| N | 0.75843776038920  | 0.96170149832981  | 0.28100212798326  |
| C | 0.64372362116322  | 1.28843496027715  | -2.17953898968534 |
| C | 1.68072049342199  | 2.22452226954485  | -2.07880615418374 |
| H | 2.07326719896939  | 2.51135189404826  | -1.10498653874648 |
| C | 2.24510583809327  | 2.78843205436868  | -3.22537696108340 |
| H | 3.05056174857051  | 3.51624204982261  | -3.12370763231188 |
| H | 2.23565303864316  | 2.85820627391391  | -5.38491492944514 |
| C | 1.79176206148397  | 2.41889340507341  | -4.49131026588504 |
| C | 0.78221667691575  | 1.46029769277736  | -4.60668923498449 |
| H | 0.43951598435840  | 1.13822406004365  | -5.59053123327291 |
| C | 0.22594104066361  | 0.89227190048326  | -3.46323102179106 |
| H | -0.52780946636272 | 0.11146216464770  | -3.57464342625466 |
| C | 0.04013504025058  | 0.60242540863805  | -0.95202836090768 |
| C | -1.45898898110551 | 0.72599911559947  | -0.75117265603917 |
| C | -2.32687335189615 | 1.23028527824260  | -1.72845262658685 |
| H | -1.92876084239179 | 1.61597275521955  | -2.66512033638645 |
| C | -3.70636511980877 | 1.26589061231450  | -1.50832259096735 |
| H | -4.36098329184528 | 1.66651952635862  | -2.28326643980132 |
| C | -4.24422783543885 | 0.81123368434074  | -0.30420474837417 |
| H | -5.32066314840621 | 0.84661563445658  | -0.13369763367040 |
| C | -3.38613627897625 | 0.33660832099240  | 0.69185562915702  |
| H | -3.78850472222197 | 0.00570213805717  | 1.65031074308048  |
| C | -2.01228765125977 | 0.29701199682488  | 0.46982135956156  |
| H | -1.35595326963308 | -0.07009840298865 | 1.25963338454194  |
| C | 0.49534565237649  | 2.26399542135895  | 0.89243449703031  |
| C | 1.69885275984008  | 0.05812882091105  | 0.66845721381868  |
| C | 2.57731423526769  | 0.27811872405934  | 1.83271816098764  |
| C | 3.92396097959579  | -0.10440907485756 | 1.71222013838695  |
| H | 4.27403016925934  | -0.50817540000996 | 0.76272988136094  |
| C | 4.78773201977148  | 0.03182322011403  | 2.79563921804245  |
| H | 5.83521779803283  | -0.25220651592634 | 2.69115718652899  |
| C | 4.31104570305825  | 0.52127512605866  | 4.01557871644360  |
| H | 4.98698386307233  | 0.61923597653409  | 4.86561113741607  |
| C | 2.96615754023256  | 0.87533097452248  | 4.14939791428834  |
| H | 2.58782402954035  | 1.23765870422425  | 5.10557370726860  |
| C | 2.10089153902859  | 0.76334617975464  | 3.06135787525682  |
| H | 1.04894292034377  | 1.02040153560865  | 3.18454020734374  |
| H | 1.40096464806535  | 2.63259345723448  | 1.38587889311815  |
| H | 0.19980185380873  | 2.97116560109212  | 0.10868561089410  |
| H | -0.32186005784067 | 2.20980928869901  | 1.62594097046535  |
| C | -2.73836129533701 | -3.23163324366090 | -0.46210135303142 |
| C | -2.59910397640400 | -3.72447922983439 | 0.86049589713911  |
| C | -1.38486561943607 | -3.43661441574117 | 1.53553663366983  |
| C | -0.41094959971556 | -2.69548396342326 | 0.91018599232537  |
| C | -1.71771060659316 | -2.50996471108812 | -1.02677444861719 |
| H | -3.64285634443898 | -3.42167238075506 | -1.03886227548238 |
| H | -1.21025321224677 | -3.80084791261045 | 2.54783255853442  |
| H | 0.54308543072207  | -2.44701198733218 | 1.37642197323541  |
| H | -1.78099244560083 | -2.12206593853031 | -2.04384920333149 |
| N | -3.58075477223235 | -4.43766432036862 | 1.45021574242727  |
| N | -0.57264993274846 | -2.23230104337038 | -0.35330438010831 |
| H | -3.46254540205471 | -4.82779300538083 | 2.37738894615463  |
| H | -4.43066794842932 | -4.67231714618190 | 0.95173108613544  |

3b'+AP Y=OMe

|   |                  |                   |                   |
|---|------------------|-------------------|-------------------|
| P | 7.24687805839241 | 11.27458073713417 | 18.05461384883264 |
| N | 6.58625029502277 | 10.82990635062832 | 20.85080629825602 |
| N | 6.67437940962351 | 9.03277595679579  | 19.61616566080223 |
| N | 8.44408169900306 | 10.52103760005596 | 17.26204335406396 |

|   |                   |                   |                   |
|---|-------------------|-------------------|-------------------|
| N | 9.35317558332435  | 12.63390650226694 | 17.60610906593210 |
| C | 6.84647180567293  | 10.37976602356452 | 19.60088229988547 |
| C | 6.72975372345194  | 12.20261406296322 | 21.32987872256456 |
| H | 6.28580635618498  | 12.90154870553611 | 20.61240621768913 |
| C | 6.28446672152586  | 9.76094154570486  | 21.66347398576729 |
| C | 6.33533882163941  | 8.63563688415298  | 20.88944438465419 |
| C | 6.73737025949096  | 8.13243992199394  | 18.45462635657389 |
| H | 7.58029869670866  | 8.42162037631084  | 17.81710886907972 |
| C | 5.70057710347761  | 11.32630261275649 | 17.18422010739325 |
| C | 5.69023849883433  | 11.01340030377595 | 15.81513151215818 |
| H | 6.60362506566146  | 10.66768422086125 | 15.33013085932880 |
| C | 4.50395006951530  | 11.14921701501000 | 15.09643008321554 |
| H | 4.48143562465819  | 10.89893775686903 | 14.03568682922305 |
| C | 3.34783165323569  | 11.60908453115270 | 15.73422510307791 |
| H | 2.42430976908422  | 11.72105313449542 | 15.16529589283403 |
| C | 3.36226070873746  | 11.92139685279928 | 17.09861672208576 |
| H | 2.45567032579296  | 12.27657848113444 | 17.58832997381205 |
| C | 4.53632587315606  | 11.77381534307574 | 17.83168651548082 |
| H | 4.54159375891170  | 12.01606685301592 | 18.89603944029519 |
| C | 8.08019835915656  | 12.93542020714392 | 18.29026511236549 |
| H | 8.28125945242051  | 13.10872535695998 | 19.35584848263625 |
| C | 7.27776697738742  | 14.05720561333397 | 17.69242265361012 |
| C | 7.08321346393199  | 14.14074845322442 | 16.30632948874947 |
| H | 7.58028567056077  | 13.43354546183931 | 15.63975462509513 |
| C | 6.26741121259863  | 15.13767839362664 | 15.77472311567670 |
| H | 6.12629202032948  | 15.20485509723112 | 14.69584430533958 |
| C | 5.63696855363997  | 16.05425359398608 | 16.62219589712814 |
| H | 5.00119582822742  | 16.83484760069031 | 16.20393708219798 |
| C | 5.83877440700729  | 15.98375884220684 | 18.00225069099215 |
| H | 5.36961644349429  | 16.71362668096492 | 18.66232228987133 |
| C | 6.66029711014434  | 14.98872675364741 | 18.53563153487740 |
| H | 6.84231270004281  | 14.95665407987341 | 19.61241913893984 |
| C | 10.29537787077027 | 13.73976376050322 | 17.44730206750869 |
| C | 9.51735001325711  | 11.35014235804301 | 17.19279288335552 |
| C | 10.76897611013250 | 10.82600009038047 | 16.68106601831839 |
| C | 10.72690757115323 | 9.76347670386565  | 15.74662049816760 |
| H | 9.76044312052841  | 9.40875129976583  | 15.39087013365184 |
| C | 11.88808095781181 | 9.19588543384138  | 15.26775015148739 |
| H | 11.86617423424692 | 8.39847097599292  | 14.52522823776794 |
| C | 13.14342139736399 | 9.64797116034322  | 15.73365437491617 |
| C | 13.19948783114607 | 10.67144141601556 | 16.70132805689251 |
| H | 14.15351588982659 | 11.00695996429736 | 17.10239529818910 |
| C | 12.02481324852181 | 11.25471621594808 | 17.15439811417399 |
| H | 12.09066179544517 | 12.01083568636806 | 17.93385083701370 |
| H | 10.95479359090090 | 13.54006888060893 | 16.59730650916013 |
| H | 9.72567514515996  | 14.65560463975389 | 17.24719715880782 |
| H | 10.89705422861227 | 13.88598559677260 | 18.35667047523748 |
| H | 6.87308658517960  | 7.11087531014816  | 18.82211834256142 |
| H | 5.79878142823161  | 8.19890047522185  | 17.88960020132174 |
| H | 6.15266807569005  | 7.59672905720882  | 21.13785021170862 |
| H | 6.06031289913582  | 9.88548261727744  | 22.71637716000965 |
| H | 6.20035428749077  | 12.29392128658646 | 22.28318899538732 |
| H | 7.79762281337154  | 12.41299531494768 | 21.47001633635402 |
| C | 11.52378509269792 | 9.49722353838998  | 20.26971216786699 |
| C | 12.43336641205561 | 10.47332911039050 | 20.73458850657300 |
| C | 11.90920930150379 | 11.76772931863193 | 20.95676408709212 |
| C | 10.56486306603269 | 12.00239417526151 | 20.71846453960570 |
| C | 10.20094451937904 | 9.84744928655604  | 20.06245293044299 |
| H | 11.85551391686062 | 8.47721710737375  | 20.07212147979566 |
| H | 12.54662524505602 | 12.57202548954761 | 21.32694571130003 |
| H | 10.16557895776167 | 13.00503747263056 | 20.90611079979225 |
| H | 9.50715397273868  | 9.09058142078185  | 19.68877302052127 |
| N | 13.75091187865034 | 10.19354969606499 | 20.92289154827856 |
| N | 9.68774869745775  | 11.07783892608793 | 20.27297325083729 |
| H | 14.34273643747035 | 10.85396965113345 | 21.41383571814749 |
| H | 14.06691698840025 | 9.23061865253473  | 20.92082379034510 |
| O | 14.21318316931220 | 9.03614570496871  | 15.20556460217773 |
| C | 15.53059207532423 | 9.46324396247642  | 15.60304403246131 |
| H | 15.68867759783253 | 9.28965379502776  | 16.67783603475959 |
| H | 16.22265763885311 | 8.84602256906392  | 15.02338979463872 |
| H | 15.68488869858861 | 10.52471640240447 | 15.36061058288594 |

TS1 Y=OMe

|   |                   |                   |                   |
|---|-------------------|-------------------|-------------------|
| P | -1.13370269495072 | -0.38316700287179 | -0.58771084476997 |
| N | -1.92666574409578 | -0.44184147115866 | 2.20703163402228  |
| N | -1.71623518126001 | -2.40562071032480 | 1.27721082144659  |
| N | 0.09486538594194  | -1.27266880579927 | -1.22742254574771 |
| N | 0.94430899919329  | 0.87137171695321  | -1.27081928820745 |

|            |                   |                   |                   |
|------------|-------------------|-------------------|-------------------|
| C          | -1.61535108487299 | -1.07091366444508 | 1.04507214667800  |
| C          | -2.00542065906794 | 1.00377030332044  | 2.43553881571082  |
| H          | -2.35368455445895 | 1.51107850881786  | 1.52969758143282  |
| C          | -2.20586907281766 | -1.38483872098368 | 3.17243277776189  |
| C          | -2.07516209760477 | -2.61367534621825 | 2.58909813093596  |
| C          | -1.56916199167686 | -3.47500343448062 | 0.27706569192335  |
| H          | -0.77328945559843 | -3.20225705176165 | -0.42529449901961 |
| C          | -2.64155089430361 | -0.60899381142138 | -1.53206433096582 |
| C          | -2.51741539490432 | -0.79491177543791 | -2.92001115024591 |
| H          | -1.52882276621683 | -0.87685071259378 | -3.37307215057279 |
| C          | -3.66552595839638 | -0.89667953296754 | -3.70406872719907 |
| H          | -3.57569718069234 | -1.04948255473801 | -4.77975538371633 |
| C          | -4.92936169227191 | -0.80776589060709 | -3.11166984904900 |
| H          | -5.82442835782020 | -0.88807888537917 | -3.72921059740876 |
| C          | -5.05383812600789 | -0.62032075183877 | -1.73036673575785 |
| H          | -6.04187065937872 | -0.55676884655484 | -1.27402260178918 |
| C          | -3.91253323132152 | -0.51831455302834 | -0.93801131974437 |
| H          | -4.01813250846198 | -0.36710346567095 | 0.13845101245874  |
| C          | -0.16644551580771 | 1.09877860239714  | -0.32918251901904 |
| H          | 0.56827396660138  | 0.70801095507095  | 0.90834049687421  |
| C          | -0.73030746012838 | 2.46904544429070  | -0.21734851489733 |
| C          | -2.00922529434517 | 2.78568501199555  | -0.70864062619288 |
| H          | -2.57961731142305 | 2.03704872974390  | -1.25954101516480 |
| C          | -2.55446776987346 | 4.05910135393579  | -0.52330831612688 |
| H          | -3.54876825735009 | 4.28258770306999  | -0.91146833692547 |
| C          | -1.82079113919153 | 5.04779735476603  | 0.13339580820830  |
| H          | -2.24049449575541 | 6.04459768862471  | 0.26929149176440  |
| C          | -0.53605724549012 | 4.75630230787258  | 0.60427590413969  |
| H          | 0.04899533672996  | 5.52830644703786  | 1.10535339075197  |
| C          | -0.00260821542154 | 3.47929936639508  | 0.43976062718743  |
| H          | 1.00196456870673  | 3.26723586744604  | 0.81099014500783  |
| C          | 1.61402706735860  | 1.99406901841412  | -1.92595340406040 |
| C          | 1.10216312050721  | -0.43781239758159 | -1.59105254268190 |
| C          | 2.26964256656867  | -0.97067801105736 | -2.27255779571309 |
| C          | 2.12391396404746  | -2.11813066565937 | -3.08629685947559 |
| H          | 1.13477480361383  | -2.55912749892990 | -3.20519324307935 |
| C          | 3.20903611723226  | -2.66594991477605 | -3.73930358378692 |
| H          | 3.10183617796002  | -3.53649393284003 | -4.38621713553643 |
| C          | 4.49196154252001  | -2.09533879544666 | -3.58755134931640 |
| C          | 4.65954351867112  | -0.97353614566282 | -2.75113309765541 |
| H          | 5.64379395791225  | -0.53586999449449 | -2.59723059718074 |
| C          | 3.55669166412893  | -0.42360288993781 | -2.10949475435849 |
| H          | 3.71026107370184  | 0.42625869273483  | -1.44450420516168 |
| H          | 2.14823459622559  | 1.62251313645503  | -2.80504521924033 |
| H          | 0.85887520619028  | 2.72581648661599  | -2.23976595641283 |
| H          | 2.32331564300703  | 2.49545833161500  | -1.25301111470244 |
| H          | -1.31487044161072 | -4.40133706172776 | 0.80133216114754  |
| H          | -2.51723719640704 | -3.60132934949066 | -0.26104742068086 |
| H          | -2.21550622808062 | -3.60830142881248 | 2.99598446830801  |
| H          | -2.48115953473103 | -1.10698479158037 | 4.18303012697054  |
| H          | -2.71549006775134 | 1.18310821913252  | 3.24897882798894  |
| H          | -1.02136772676976 | 1.39743126151286  | 2.71145597772148  |
| C          | 2.84951079514230  | -1.36650599424927 | 2.60655514987446  |
| C          | 3.327010411334634 | -0.50869218963158 | 3.63337444832024  |
| C          | 2.77105501206314  | 0.79709022097240  | 3.69188561746165  |
| C          | 1.82109605527513  | 1.17242947194199  | 2.76933465789590  |
| C          | 1.89150224091795  | -0.91164960518918 | 1.72927531972490  |
| H          | 3.24276302297011  | -2.37754416863374 | 2.49958529934472  |
| H          | 3.09509397943368  | 1.50700942603673  | 4.45295976882814  |
| H          | 1.38956587493045  | 2.17410592052416  | 3.77995969936085  |
| H          | 1.50990008464519  | -1.53906102696235 | 0.92170831544952  |
| N          | 4.26463317746231  | -0.91329562372797 | 4.51134011125554  |
| N          | 1.37458530528012  | 0.33749440013993  | 1.80314395818391  |
| H          | 4.61751799692913  | -0.29237130247278 | 5.23055743739305  |
| H          | 4.67514416692293  | -1.83823218936187 | 4.45726324758598  |
| O          | 5.48035091580568  | -2.69502331632995 | -4.27098077860964 |
| C          | 6.81165804369033  | -2.15318089039183 | -4.18954461246529 |
| H          | 7.19155354961688  | -2.20244601098695 | -3.15812278741109 |
| H          | 7.42310941496117  | -2.78675298082276 | -4.83829954286319 |
| H          | 6.83361879010543  | -1.11591170279419 | -4.55512415620725 |
| INT1 Y=OMe |                   |                   |                   |
| P          | 7.61540414334997  | 11.35917945365330 | 17.77856646153634 |
| N          | 7.12019252906172  | 11.70199554709953 | 20.64322773620633 |
| N          | 6.92118711709807  | 9.64380826458421  | 19.93615070587020 |
| N          | 9.09721039884519  | 10.76282386982101 | 17.29704679839281 |
| N          | 9.38341041953077  | 13.03025916798038 | 17.13326850593094 |
| C          | 7.06436766589355  | 10.94109891895769 | 19.50873279961634 |

|   |                   |                   |                   |
|---|-------------------|-------------------|-------------------|
| C | 7.29208356679408  | 13.15151031748385 | 20.73162405421761 |
| H | 6.46626431424912  | 13.66747868166005 | 20.22811542121387 |
| C | 6.96986688448184  | 10.89795330082171 | 21.74976488882724 |
| C | 6.85241307690982  | 9.61157117284936  | 21.31044198806616 |
| C | 6.82667309056947  | 8.44131910000989  | 19.10602675461906 |
| H | 7.58148016055992  | 8.47261586597061  | 18.31415840570013 |
| C | 6.34666597977017  | 10.51363783148618 | 16.81944505147625 |
| C | 6.68282847357912  | 10.00999614074808 | 15.55226208601192 |
| H | 7.71381055884783  | 10.07374467601860 | 15.20237090256547 |
| C | 5.69433678142178  | 9.44274321301710  | 14.74872401218616 |
| H | 5.95301476701616  | 9.04925487069650  | 13.76515586286779 |
| C | 4.36947057244293  | 9.39247843466500  | 15.19501757422918 |
| H | 3.59752584433409  | 8.95831308113705  | 14.55904533302431 |
| C | 4.02858823910594  | 9.91164815247380  | 16.44836085229034 |
| H | 2.99303107813947  | 9.88500259026953  | 16.78853137419612 |
| C | 5.01338915427374  | 10.47371344592715 | 17.25961258291606 |
| H | 4.74243200022731  | 10.89173135180601 | 18.23206872045060 |
| C | 8.06233773101564  | 13.02788104747071 | 17.64515845631744 |
| H | 9.87102123867794  | 9.31127056828498  | 17.42618148387581 |
| C | 7.20571709747939  | 14.18407578477675 | 17.81594012411021 |
| C | 5.81050329095707  | 14.02900718292666 | 17.64724118441640 |
| H | 5.41895446147199  | 13.09521634585139 | 17.24258157090055 |
| C | 4.92741022347340  | 15.07259818500146 | 17.92526801030325 |
| H | 3.85683455844117  | 14.92509755573925 | 17.77856223424964 |
| C | 5.41208647458641  | 16.30993099609666 | 18.35207389375511 |
| H | 4.72580127167266  | 17.13223661996615 | 18.55314058411097 |
| C | 6.79176275882737  | 16.48710853821352 | 18.50985630467952 |
| H | 7.18128889031448  | 17.44838547081953 | 18.84709771313264 |
| C | 7.67625549227289  | 15.44164664461843 | 18.26016677911097 |
| H | 8.73860111607171  | 15.59837649723321 | 18.44396694625633 |
| C | 9.99364584480730  | 14.23073330226869 | 16.54882741533687 |
| C | 9.93409404522744  | 11.79893735535379 | 17.02075163699836 |
| C | 11.32188750320733 | 11.56729825421278 | 16.61826562152733 |
| C | 11.61103193298200 | 10.64589879628669 | 15.58934965300469 |
| H | 10.79081716165524 | 10.16999673895440 | 15.05070647495335 |
| C | 12.91737126781349 | 10.36800005403511 | 15.22798708293997 |
| H | 13.14627841098364 | 9.67983104024094  | 14.41423020288816 |
| C | 13.98724685141224 | 11.00788123912672 | 15.88780583050745 |
| C | 13.71471558844658 | 11.93404781690486 | 16.91181614612856 |
| H | 14.52300095512874 | 12.44358879230213 | 17.43272611709958 |
| C | 12.39435421960819 | 12.20463791384114 | 17.26402785167774 |
| H | 12.19803787163000 | 12.91260046271814 | 18.07085827135773 |
| H | 10.75065326054008 | 13.91983242328600 | 15.82302369368829 |
| H | 9.21302193093327  | 14.81216937162290 | 16.04503718166355 |
| H | 10.46606453011845 | 14.85712292818217 | 17.31556522307791 |
| H | 7.01041576424648  | 7.57386794584576  | 19.74790107118593 |
| H | 5.83336779808007  | 8.36401350895841  | 18.64793568053306 |
| H | 6.72837880625740  | 8.68619651991996  | 21.86031192702641 |
| H | 6.95702848563746  | 11.30420054321453 | 22.75417183739383 |
| H | 7.31331933653490  | 13.42344552468932 | 21.79095965826878 |
| H | 8.23257925099516  | 13.43542477503332 | 20.24719305106063 |
| C | 10.84851519906307 | 6.20892330952662  | 16.60474725759502 |
| C | 12.09913762058935 | 6.15610710451740  | 17.28106198403585 |
| C | 12.48282869092498 | 7.30119380454465  | 18.03255895651734 |
| C | 11.65317687955504 | 8.39294632344152  | 18.08200151090393 |
| C | 10.07141819538600 | 7.33647176372555  | 16.70193087711611 |
| H | 10.50413744217617 | 5.36787389293702  | 16.00395467659003 |
| H | 13.43498354129292 | 7.32603396180122  | 18.56112390380079 |
| H | 11.91519546637526 | 9.30257714940084  | 18.61998065534775 |
| H | 9.11589580589141  | 7.43046915376017  | 16.18670451237209 |
| N | 12.88841126930450 | 5.07096319446532  | 17.20616913679908 |
| N | 10.46116693874125 | 8.40333535022857  | 17.43858609522292 |
| H | 13.78237055288451 | 5.03318751263038  | 17.68298495262035 |
| H | 12.61991006247239 | 4.25756095080622  | 16.66366704231359 |
| O | 15.22158014061407 | 10.67090370252159 | 15.46412151163331 |
| C | 16.35473686526354 | 11.34947885400642 | 16.03570118775121 |
| H | 16.43331568162820 | 11.14670811466182 | 17.11469123555051 |
| H | 17.22908225073462 | 10.94252312587797 | 15.51963779172160 |
| H | 16.29137919909217 | 12.43325385801258 | 15.85828247615853 |

TS2 Y=OMe

|   |                   |                   |                   |
|---|-------------------|-------------------|-------------------|
| P | -1.08951662820108 | 0.57355922510478  | -0.08694389104215 |
| N | -2.27774746449771 | -0.66605445342868 | 2.66118780704804  |
| N | -2.27860568585519 | -2.27716283536572 | 1.23760365380411  |
| N | 0.40826392120437  | -0.19094881709335 | -0.29153743217540 |
| N | 0.81187502983999  | 1.86382209639863  | -1.27197468144809 |
| C | -1.64873469947016 | -1.09948440164873 | 1.52837665619157  |
| C | -1.91727576996502 | 0.55229878582353  | 3.38058074220069  |

|   |                   |                   |                   |
|---|-------------------|-------------------|-------------------|
| H | -2.82449823339600 | 1.05889568199255  | 3.73046210605998  |
| C | -3.26684752146987 | -1.54541067738622 | 3.06391476016047  |
| C | -3.27101933568752 | -2.56522264485896 | 2.15643461028125  |
| C | -1.98983652430000 | -3.09394632828271 | 0.06333824382498  |
| H | -1.07617777243784 | -2.71654602617406 | -0.40609848948712 |
| C | -2.45254362531593 | -0.06677751173144 | -1.09811671984686 |
| C | -2.21558198446350 | -0.53970344868716 | -2.39741721694490 |
| H | -1.20281278415051 | -0.54790249757862 | -2.80286396379177 |
| C | -3.28200769285919 | -1.00522195836299 | -3.16774508737025 |
| H | -3.10027778070936 | -1.37868943278065 | -4.17606116134965 |
| C | -4.58145907995494 | -0.98368685477636 | -2.65058062649961 |
| H | -5.41383425445905 | -1.33965704576648 | -3.25841979260038 |
| C | -4.81732895240840 | -0.50464675611293 | -1.35790594138909 |
| H | -5.83199789206526 | -0.48080194656846 | -0.95959339451305 |
| C | -3.75377088512077 | -0.05216547836772 | -0.57640602402975 |
| H | -3.93720761026449 | 0.31737314522883  | 0.43351483567685  |
| C | -0.53215706479407 | 1.97817563729881  | -1.09995316760139 |
| H | 0.55200824951198  | -1.38048930045733 | 1.52579204017643  |
| C | -1.27006786226036 | 3.19284828929013  | -1.42294168702998 |
| C | -2.49334164513559 | 3.10204709608769  | -2.11902445601503 |
| H | -2.84914125796732 | 2.13179179520954  | -2.45984681687625 |
| C | -3.22129366740417 | 4.25315769113548  | -2.40928407321839 |
| H | -4.15272564718719 | 4.17497648938085  | -2.97024224880925 |
| C | -2.76050635296963 | 5.50327363177036  | -1.98715367920968 |
| H | -3.33738636172602 | 6.40130399786728  | -2.20987809632486 |
| C | -1.55914224780664 | 5.60370536656910  | -1.27703463199000 |
| H | -1.20618643658952 | 6.57639687710679  | -0.93378113049498 |
| C | -0.81339261534851 | 4.46156288276598  | -1.00455389036326 |
| H | 0.10758195775162  | 4.54679110587195  | -0.42678665874599 |
| C | 1.63169694744052  | 2.83091020071948  | -2.02051058921104 |
| C | 1.29887157167022  | 0.61051640122559  | -0.82032627959177 |
| C | 2.71435984102772  | 0.23791585832055  | -0.85267038452533 |
| C | 3.03662471984701  | -1.11953806141020 | -1.07653422797556 |
| H | 2.23745426634573  | -1.81509038100373 | -1.33180026672559 |
| C | 4.34211595684699  | -1.56430256264996 | -0.99914494236742 |
| H | 4.59885358930793  | -2.60322229415763 | -1.20631277803654 |
| C | 5.38130329677015  | -0.66350455714323 | -0.68393981711721 |
| C | 5.07613193746081  | 0.68921379360807  | -0.44914169418562 |
| H | 5.85838232798514  | 1.40347078016013  | -0.19955346994523 |
| C | 3.75655369934853  | 1.12550082354984  | -0.53653297477633 |
| H | 3.54587687151041  | 2.17156142027112  | -0.31656088760100 |
| H | 2.39978249622841  | 2.28202053663641  | -2.57478761903045 |
| H | 0.98035612812885  | 3.36530973354458  | -2.71938281271474 |
| H | 2.11190374908769  | 3.55992891009053  | -1.35677487891780 |
| H | -1.85457933250345 | -4.14169036014168 | 0.36106432896928  |
| H | -2.81428598206692 | -3.03031824832078 | -0.65873825563236 |
| H | -3.88595503777845 | -3.45626193211723 | 2.10035622614459  |
| H | -3.86952497878017 | -1.38756085104708 | 3.95113740511200  |
| H | -1.28202244080460 | 0.31747190386980  | 4.24489926257665  |
| H | -1.37693854078527 | 1.21428602268019  | 2.69428472516339  |
| C | 2.96362428604097  | -3.55237752801829 | 2.17331791226430  |
| C | 4.00213061611891  | -2.65243032389537 | 2.53920695362719  |
| C | 3.68792517432560  | -1.26610431022966 | 2.56111064617944  |
| C | 2.42728234496024  | -0.84800525178549 | 2.22234404878253  |
| C | 1.72267341432530  | -3.06540243128228 | 1.85039546841203  |
| H | 3.14127045847747  | -4.62667650426180 | 2.14462015096332  |
| H | 4.43981419880533  | -0.52802598764237 | 2.83550644954081  |
| H | 2.14211512016001  | 0.20067628067089  | 2.20490419017444  |
| H | 0.89853466135496  | -3.71173929814068 | 1.55638188277227  |
| N | 5.23227308700877  | -3.09622209088300 | 2.84693010623329  |
| N | 1.46341399570677  | -1.73717410140826 | 1.88168983740547  |
| H | 5.96698697222509  | -2.46003423814297 | 3.13407893839996  |
| H | 5.45136628246907  | -4.08614847076655 | 2.85179877451196  |
| O | 6.62071779133015  | -1.19186993352233 | -0.63097452297622 |
| C | 7.74085144760985  | -0.30282344248703 | -0.45973744009943 |
| H | 8.62976351287299  | -0.93714441945684 | -0.52300391207642 |
| H | 7.76540491517121  | 0.45061319049560  | -1.26037083080018 |
| H | 7.70767854268286  | 0.19269203459794  | 0.52280017081606  |

INT2 Y=OMe

|   |                  |                   |                   |
|---|------------------|-------------------|-------------------|
| P | 7.53362455129389 | 11.99521254508272 | 18.28644692674988 |
| N | 8.39406838948571 | 10.61797634335597 | 17.82310409866012 |
| N | 9.52183776806883 | 12.33388909584504 | 16.73717257325751 |
| C | 5.85436069299534 | 11.89141498660596 | 17.59815018880875 |
| C | 5.60232215018716 | 11.30113085002189 | 16.34961143975735 |
| H | 6.41933328490881 | 10.86940678632286 | 15.77094442102152 |
| C | 4.29735925474671 | 11.26174715318190 | 15.86313088246716 |
| H | 4.09387743853371 | 10.79954679936486 | 14.89654132915290 |

|   |                   |                   |                    |
|---|-------------------|-------------------|--------------------|
| C | 3.25077575144941  | 11.81380130601662 | 16.61126601851050  |
| H | 2.23210761874559  | 11.78133490802573 | 16.22331079277175  |
| C | 3.50312341191792  | 12.39509392625717 | 17.85554967191899  |
| H | 2.68468490598874  | 12.81298307787078 | 18.44230797180679  |
| C | 4.80556013934351  | 12.42779185259281 | 18.35809689925464  |
| H | 5.00945604215440  | 12.86749996237488 | 19.33545271793477  |
| C | 8.48699631933492  | 13.05942154958218 | 17.17800929728296  |
| C | 8.28994456877204  | 14.47588704588454 | 16.91862548551037  |
| C | 7.00114051307433  | 14.93022972427537 | 16.57134769167123  |
| H | 6.18680403960567  | 14.21529324445801 | 16.46361679603843  |
| C | 6.78052764817139  | 16.28337030590599 | 16.33045102836156  |
| H | 5.78683930845398  | 16.62502638237082 | 16.04019035517692  |
| C | 7.82776361400793  | 17.19991456073129 | 16.46249840068110  |
| H | 7.64886274776585  | 18.26059440253402 | 16.28293767346067  |
| C | 9.10285815397570  | 16.76016034067797 | 16.83400249016818  |
| H | 9.91394710349768  | 17.47788940225733 | 16.95992366639046  |
| C | 9.34071430173037  | 15.40724763477818 | 17.05413381596714  |
| H | 10.31440199636061 | 15.06486176169043 | 17.40414842033601  |
| C | 10.54752623455106 | 12.85522739707618 | 15.82687740969505  |
| C | 9.45720262783563  | 10.94648611747451 | 17.15026158346625  |
| C | 10.51414855712523 | 9.99607429195227  | 16.81502718716147  |
| C | 10.13714153327978 | 8.66157454518565  | 16.54542994110223  |
| H | 9.07839474689280  | 8.40350882020487  | 16.54004373121810  |
| C | 11.08917039258038 | 7.69437105748213  | 16.29014354564005  |
| H | 10.80454310988699 | 6.66703228190832  | 16.06349727294009  |
| C | 12.4600927029833  | 8.02241399427240  | 16.32275559079111  |
| C | 12.85200160441034 | 9.33883661172734  | 16.62342023430984  |
| H | 13.90405723605436 | 9.60916031942411  | 16.68545061376321  |
| C | 11.88268221976924 | 10.30928966521416 | 16.86089955736416  |
| H | 12.21376433437547 | 11.31217327943961 | 17.12822846783235  |
| H | 10.87585028164990 | 12.04451892365102 | 15.17001554844474  |
| H | 10.10930796573241 | 13.66788434423623 | 15.23847502756329  |
| H | 11.40241334741820 | 13.24222626468396 | 16.39470821215239  |
| C | 9.79095258344575  | 11.74423174124718 | 21.09579120508782  |
| C | 8.89021847049230  | 12.57957436308444 | 21.78932258730905  |
| C | 8.76392236477339  | 13.90367985943102 | 21.31803355916258  |
| C | 9.50239033518167  | 14.30244090233765 | 20.21375093188264  |
| C | 10.48397024316574 | 12.25445827407209 | 20.00753705480472  |
| H | 9.94610047464228  | 10.71012675703835 | 21.40712918916188  |
| H | 8.09779924909681  | 14.61076132186334 | 21.81545686943369  |
| H | 9.40145437360258  | 15.32706219628245 | 19.84556540089929  |
| H | 11.19179958071417 | 11.60818606157251 | 19.48045862448821  |
| N | 8.14645587040881  | 12.11660669101709 | 22.83946921055099  |
| N | 10.35423369556813 | 13.50942316841224 | 19.533673444957395 |
| H | 7.67985950695995  | 12.78286381958106 | 23.44366016127535  |
| H | 8.40232040956812  | 11.23686351455200 | 23.27224804793496  |
| O | 13.31222883492982 | 7.00916758225701  | 16.06098468985119  |
| C | 14.72227245415712 | 7.27780231526757  | 16.08445483670596  |
| H | 15.04373627756375 | 7.60945013615661  | 17.08362702217881  |
| H | 15.20506824856695 | 6.32703301755243  | 15.83951052839295  |
| H | 14.99146705073208 | 8.03476763627658  | 15.33203678474358  |

TS3 Y=OMe

|   |                   |                   |                   |
|---|-------------------|-------------------|-------------------|
| P | -1.77400398709583 | -0.84825578255362 | 0.44667399401812  |
| N | -0.71535455404085 | -2.09757450632239 | -0.03400015134859 |
| N | 0.52920869828648  | -0.18966425333560 | -0.52222368679158 |
| C | -2.95117501144552 | -0.63699293565412 | -0.94038106756850 |
| C | -2.68459300458780 | -1.11940358275970 | -2.22856656525034 |
| H | -1.78400538324944 | -1.70322339981989 | -2.42082693348504 |
| C | -3.58846878910790 | -0.86071744402481 | -3.25860316536825 |
| H | -3.39092657646564 | -1.24369284256693 | -4.26059626845689 |
| H | -5.44645811132216 | 0.08742367554249  | -3.81814220662119 |
| C | -4.74385117452504 | -0.11329788015638 | -3.00863789502564 |
| C | -5.00754389809934 | 0.36413906436938  | -1.72309476685928 |
| H | -5.91562787357396 | 0.93429158365718  | -1.52485803597792 |
| C | -4.11738812953057 | 0.09462129163067  | -0.68193153810573 |
| H | -4.33060904136520 | 0.45050077997031  | 0.32731124612853  |
| C | -0.56665871925001 | 0.42660499432844  | -0.06961263256946 |
| C | -0.96462429861283 | 1.80279596394744  | -0.32251420027908 |
| C | -0.85116069707902 | 2.34264067348265  | -1.61880925543395 |
| H | -0.38617256017588 | 1.76187539439082  | -2.41584740811426 |
| C | -1.40455688208560 | 3.58814006182254  | -1.90616829509918 |
| H | -1.32572408243399 | 3.99120406225388  | -2.91611002733885 |
| C | -2.06965394388138 | 4.30951196637477  | -0.91159495473870 |
| H | -2.49502593717772 | 5.28711859649117  | -1.14000084545314 |
| C | -2.19944133001878 | 3.77121171866823  | 0.37235654170138  |
| H | -2.72472925524779 | 4.32837315066642  | 1.14852654479053  |
| C | -1.66305595294734 | 2.52094723125223  | 0.66532555827355  |

|   |                   |                   |                   |
|---|-------------------|-------------------|-------------------|
| H | -1.74442416903268 | 2.09353801648636  | 1.66443644085239  |
| C | 1.74520513743412  | 0.51833845857970  | -0.93237678880487 |
| C | 0.43651118241858  | -1.63575432615005 | -0.40408578979402 |
| C | 1.56828949529234  | -2.50163652131836 | -0.73444928746472 |
| C | 1.29113523799843  | -3.70023816183452 | -1.42812420300149 |
| H | 0.26507998069100  | -3.90967751847326 | -1.72967581678265 |
| C | 2.29878480046088  | -4.59747075032165 | -1.72403121908166 |
| H | 2.09479039506397  | -5.51560184492820 | -2.27467089274863 |
| C | 3.62034653929681  | -4.34039272555793 | -1.30734347116791 |
| C | 3.90487705921656  | -3.17016341548541 | -0.58218270339741 |
| H | 4.91067942713564  | -2.96779823227167 | -0.21977513584282 |
| C | 2.88443679413022  | -2.26319646886443 | -0.30816189862176 |
| H | 3.12200645000360  | -1.38676832287746 | 0.29323532026300  |
| H | 2.22894599120540  | -0.02288359711307 | -1.75145172364503 |
| H | 1.48077414644933  | 1.52817284156162  | -1.25436152979216 |
| H | 2.43380949027674  | 0.59308582213570  | -0.08064379470222 |
| C | 1.64612103284930  | -0.38999811516330 | 3.87150949291099  |
| C | 2.49158902931334  | 0.72491120320248  | 4.07190331049457  |
| C | 2.24460237946218  | 1.86596493388154  | 3.27487748556416  |
| C | 1.20513168877061  | 1.83887781042684  | 2.35872925609099  |
| C | 0.63284994508434  | -0.31123501029433 | 2.93022909272032  |
| H | 1.77623726119650  | -1.30108101587455 | 4.45712193911802  |
| H | 2.85636865630632  | 2.76302409273452  | 3.38080423498839  |
| H | 0.99576057689767  | 2.71564158389106  | 1.73890701851459  |
| H | -0.03943218222409 | -1.16058062026012 | 2.77798579321104  |
| N | 3.51643884159911  | 0.68977135889183  | 4.96891252112624  |
| N | 0.39819120660228  | 0.77877603037307  | 2.17747005660234  |
| H | 4.00712188130984  | 1.54224597072724  | 5.20981222380958  |
| H | 3.57699910344373  | -0.06906807885711 | 5.63675712841335  |
| O | 4.53351318752626  | -5.27706899918515 | -1.64293960655253 |
| C | 5.89552702476997  | -5.07890142031176 | -1.23821496227377 |
| H | 5.97944156027754  | -5.04096869622246 | -0.14109171792398 |
| H | 6.44345508295825  | -5.94630336994120 | -1.61853853260463 |
| H | 6.30826305084897  | -4.15824282324117 | -1.67887981550423 |

4b' Y=OMe

|   |                    |                   |                   |
|---|--------------------|-------------------|-------------------|
| P | 11.99256990880781  | -1.10440445866047 | 20.48646257538785 |
| N | 13.27279839495874  | -0.88561383201993 | 21.58851522151659 |
| N | 11.57837729590617  | 0.15184383188107  | 22.81273566984854 |
| C | 12.21338976501968  | 0.29893141090245  | 19.34928059843434 |
| C | 13.15289844066183  | 1.31969277909024  | 19.55838876579331 |
| H | 13.82133044979972  | 1.27076812995171  | 20.41824204545835 |
| C | 13.22874128401023  | 2.38828093405645  | 18.66531066675276 |
| H | 13.96304634013645  | 3.17902370287991  | 18.82510464543532 |
| H | 12.42918715652418  | 3.28401416614486  | 16.86892270002937 |
| C | 12.36657175251476  | 2.44652451066379  | 17.56493865731191 |
| C | 11.44002407371175  | 1.42399870889635  | 17.34401589730349 |
| H | 10.77947561942429  | 1.46068054071975  | 16.47705956653072 |
| C | 11.37234632495286  | 0.34632412758994  | 18.22659887637085 |
| H | 10.65915639164976  | -0.46118570729426 | 18.04567392371707 |
| C | 10.70070158593938  | -0.43109459274426 | 21.83371419604448 |
| C | 9.56568694018632   | 0.44513659216141  | 21.37355232207610 |
| C | 9.85727519606051   | 1.68623276378569  | 20.78534622926547 |
| H | 10.89219700685990  | 2.00447904341215  | 20.67322780990232 |
| C | 8.85192345991232   | 2.54133170444237  | 20.34195329573583 |
| H | 9.12877856395508   | 3.49311903910210  | 19.89325963006544 |
| C | 7.50566979813133   | 2.16661726480855  | 20.47533465100752 |
| C | 7.19680351891918   | 0.94014506722228  | 21.08542220595014 |
| H | 6.14927614798436   | 0.66579014943239  | 21.20941986926712 |
| C | 8.21048235925460   | 0.10252442258771  | 21.53057397437830 |
| H | 7.91867739285792   | -0.82705708915371 | 22.01804677216384 |
| C | 11.13914768955141  | 1.23392456588978  | 23.69781895026321 |
| C | 12.91635640117259  | -0.26002024030728 | 22.67011724472668 |
| C | 13.89792971292924  | -0.00511924201762 | 23.74469288132424 |
| C | 15.23740525987672  | 0.21135108991123  | 23.38021857106868 |
| H | 15.49983579706981  | 0.20869003705166  | 22.32258692339684 |
| C | 16.20939223824173  | 0.40881350602782  | 24.35706221021279 |
| H | 17.24427995059151  | 0.58634125730380  | 24.06314856276270 |
| C | 15.86186789350160  | 0.37321912415636  | 25.71114816749873 |
| H | 16.62454950886202  | 0.52459258845254  | 26.47571761811228 |
| C | 14.53665587028708  | 0.13589125812339  | 26.08401181453623 |
| H | 14.26453378142959  | 0.09050218499384  | 27.13896172010715 |
| C | 13.55885084187216  | -0.04681501881007 | 25.10707215859471 |
| H | 12.53096870660639  | -0.23859140256883 | 25.41641207402075 |
| H | 12.01530679913530  | 1.77717331661723  | 24.06275988127081 |
| H | 10.499337488975303 | 1.92813142944037  | 23.14056662231602 |
| H | 10.56541842154793  | 0.86365591743698  | 24.56277999382404 |
| C | 9.08385502319469   | -3.84853773471340 | 21.94027429592695 |

|           |                   |                   |                   |
|-----------|-------------------|-------------------|-------------------|
| C         | 9.20661722880573  | -4.23298916772962 | 23.29994937544843 |
| C         | 9.83024428880356  | -3.30661170137442 | 24.17312218320460 |
| C         | 10.28202988968465 | -2.10312488413970 | 23.68980442957768 |
| C         | 9.56862712345422  | -2.63499915971885 | 21.52352713774659 |
| H         | 8.62142801208830  | -4.51155426700622 | 21.20998831087215 |
| H         | 9.96713897258528  | -3.53685516035782 | 25.22899326364011 |
| H         | 10.78077076320517 | -1.37548126953604 | 24.32268013290111 |
| H         | 9.51163178350894  | -2.31299423215558 | 20.48693633474999 |
| N         | 8.75407905009807  | -5.42402295337128 | 23.73896612142640 |
| N         | 10.15242601675126 | -1.76034303400400 | 22.38646714236111 |
| H         | 8.86120327402167  | -5.70377710796789 | 24.70656998217602 |
| H         | 8.32922459699136  | -6.09082417584336 | 23.10580190189466 |
| O         | 6.44998654848628  | 2.91038201122891  | 20.06453640316894 |
| C         | 6.71900811754578  | 4.17107615860628  | 19.43797670397412 |
| H         | 7.24021975715407  | 4.85354094145047  | 20.12751214941151 |
| H         | 7.31619598776068  | 4.03852383850821  | 18.52224899494268 |
| H         | 5.73996751529274  | 4.58726202656457  | 19.18105499679347 |
| TS4 Y=OMe |                   |                   |                   |
| P         | 0.32940423615509  | -0.94531741642584 | -1.37242506999739 |
| N         | 1.61982661655885  | -0.87543069918723 | -0.25919348462285 |
| N         | 0.32342891916530  | 0.90826654344565  | 0.43115258525771  |
| C         | 0.77620177402255  | 0.77721737371421  | -2.37562874206977 |
| C         | 1.88495819987149  | 1.59715488806751  | -2.14426289653355 |
| H         | 2.43542825021847  | 1.53969625820614  | -1.20438844962099 |
| C         | 2.30289047505059  | 2.49063806118995  | -3.13142169817525 |
| H         | 3.17756405970153  | 3.11819002179375  | -2.95658452205350 |
| H         | 1.92936625695945  | 3.28321150792172  | -5.10601994607424 |
| C         | 1.60171706553117  | 2.58216217552984  | -4.33782871437759 |
| C         | 0.48096262656720  | 1.77552064766014  | -4.55997205028695 |
| H         | -0.06556616562431 | 1.84071157991217  | -5.50142184117155 |
| C         | 0.06120941329140  | 0.87930910427779  | -3.57865733709096 |
| H         | -0.80913623177053 | 0.24484038081553  | -3.75669447399737 |
| C         | -0.40212090336315 | 0.54188124905684  | -0.67103815687645 |
| C         | -1.71510544708430 | 1.15928138981106  | -0.94745251548713 |
| C         | -1.85694425007192 | 2.40745805404373  | -1.57224086381320 |
| H         | -0.97364726067208 | 2.94414541349858  | -1.91840048933079 |
| C         | -3.12737693659796 | 2.94087379449567  | -1.78282928660988 |
| H         | -3.23107640144109 | 3.90531416525787  | -2.28073714856535 |
| C         | -4.26297364583849 | 2.24121050270701  | -1.36496917068992 |
| H         | -5.25501913153212 | 2.66122715310481  | -1.53320144245769 |
| C         | -4.12569253065264 | 1.00105218134814  | -0.73823422755175 |
| H         | -5.00863923963198 | 0.44944286059170  | -0.41390931813669 |
| C         | -2.85768925797017 | 0.45589754749421  | -0.53317178506902 |
| H         | -2.74558709322812 | -0.51152931536122 | -0.04318930340831 |
| C         | 0.11696622411127  | 2.19474495713938  | 1.11068463959216  |
| C         | 1.44994898038400  | 0.06258091802174  | 0.62714157291426  |
| C         | 2.36613702028791  | 0.24768493114043  | 1.75320387580465  |
| C         | 3.73142672452988  | -0.05170852989651 | 1.55677295807708  |
| H         | 4.06379695119053  | -0.36442850083326 | 0.56704095740863  |
| C         | 4.63431157796272  | 0.04823539659473  | 2.59792048301990  |
| H         | 5.69322479882569  | -0.16354626588656 | 2.45059285047449  |
| C         | 4.19526333385083  | 0.42742992626094  | 3.88268844167712  |
| C         | 2.83211997429409  | 0.69384930059216  | 4.10144502955780  |
| H         | 2.46547100103319  | 0.95856718742104  | 5.09108700191615  |
| C         | 1.93515558501846  | 0.60866529485903  | 3.03986914161756  |
| H         | 0.87843552392701  | 0.78864892871291  | 3.23762184053617  |
| H         | 1.05799867063048  | 2.50854429505848  | 1.57116842776160  |
| H         | -0.19519722451783 | 2.94515609034637  | 0.37810863868063  |
| H         | -0.66012924804514 | 2.11015271683282  | 1.88174254228511  |
| C         | -2.44030929591470 | -4.11228583857566 | 0.26647454089933  |
| C         | -1.94250669598621 | -4.57285471337294 | 1.50805116603204  |
| C         | -0.76706805077666 | -3.95595955430567 | 1.99688307552632  |
| C         | -0.17011483294769 | -2.94967218650845 | 1.25924295238990  |
| C         | -1.76894084581175 | -3.10100358725082 | -0.39483973715097 |
| H         | -3.33420644269862 | -4.55454313048755 | -0.17497791602988 |
| H         | -0.32335854082069 | -4.27413703541689 | 2.94108378066605  |
| H         | 0.75100988056057  | -2.47473405307937 | 1.60224243142255  |
| H         | -2.12249078934912 | -2.74169247205245 | -1.36575359315168 |
| N         | -2.57187571412794 | -5.55457924598556 | 2.20514312991523  |
| N         | -0.65865998046238 | -2.50965963824679 | 0.08382821507735  |
| H         | -2.14764595449846 | -5.95087429548178 | 3.03421000331477  |
| H         | -3.34492376813886 | -6.06369765467317 | 1.79564736115276  |
| O         | 5.15310113953776  | 0.49958061571024  | 4.83218605861641  |
| C         | 4.77037655544647  | 0.88690730588140  | 6.15968106768689  |
| H         | 5.69692982790017  | 0.89324548404313  | 6.74168368421825  |
| H         | 4.32392467710313  | 1.89321310516657  | 6.16349539193151  |
| H         | 4.06576965988761  | 0.16157649530233  | 6.59515947497016  |

## 5b' Y=OMe

|   |                   |                   |                   |
|---|-------------------|-------------------|-------------------|
| P | 0.68914062170777  | -1.21035424374522 | -1.30323124190557 |
| N | 1.82764739400721  | -1.06061137497926 | -0.09097442632545 |
| N | 0.68403503244596  | 0.91964061713480  | 0.27353335836083  |
| C | 0.63848357631295  | 1.29177133608945  | -2.17854362170163 |
| C | 1.65667265420511  | 2.24206225419660  | -2.02393989497256 |
| H | 2.01506230323896  | 2.51231373443317  | -1.03254120398410 |
| C | 2.24591471783434  | 2.84431680235742  | -3.13743804081113 |
| H | 3.03423073529496  | 3.58353807784257  | -2.99194640682137 |
| H | 2.30054134926838  | 2.96949633479295  | -5.29380183116601 |
| C | 1.83816354480178  | 2.49901384311536  | -4.42577349514138 |
| C | 0.85066259952521  | 1.52592940530674  | -4.59544532973063 |
| H | 0.54419391860791  | 1.22285468167059  | -5.59704711082428 |
| C | 0.26802921697243  | 0.92053494482646  | -3.48380893668082 |
| H | -0.46963357535655 | 0.13149327966143  | -3.63711961269771 |
| C | -0.00032479809578 | 0.57835517639455  | -0.98346435063939 |
| C | -1.50324384563128 | 0.70664962141554  | -0.82149876261456 |
| C | -2.34206987109214 | 1.22436577620569  | -1.81730683751565 |
| H | -1.91740054305375 | 1.60690044561291  | -2.74357776789952 |
| C | -3.72532024235294 | 1.28103728270807  | -1.62805288277742 |
| H | -4.35603273125506 | 1.69330654229709  | -2.41658022802109 |
| C | -4.29710604355527 | 0.83374567480243  | -0.43666963612152 |
| H | -5.37626714591209 | 0.88675645495816  | -0.28961651499969 |
| C | -3.46875352963329 | 0.34314905833569  | 0.57634941692137  |
| H | -3.89714034626748 | 0.01737756252416  | 1.52535672955947  |
| C | -2.09089464058150 | 0.28273658721784  | 0.38519369583347  |
| H | -1.45723042415007 | -0.09186018068191 | 1.18973744929059  |
| C | 0.40175993912408  | 2.21684087255250  | 0.88715162912105  |
| C | 1.65892640230616  | 0.03924809216672  | 0.64032614030798  |
| C | 2.52459814828254  | 0.25579332506223  | 1.80589338528866  |
| C | 3.86354401899515  | -0.18339806128536 | 1.72246246167989  |
| H | 4.21125939632512  | -0.62996578099601 | 0.79162253464077  |
| C | 4.72339736994033  | -0.04340055319489 | 2.79552565664460  |
| H | 5.76428985170447  | -0.36005730847504 | 2.73038529030457  |
| C | 4.26273011814808  | 0.51334866918110  | 4.00500894765584  |
| C | 2.92157657139154  | 0.91825010782196  | 4.11655353090653  |
| H | 2.53498905915285  | 1.32361841924036  | 5.04944767053002  |
| C | 2.07110051505459  | 0.79557401811469  | 3.01992582530929  |
| H | 1.02933268120406  | 1.09053812274098  | 3.14037907151539  |
| H | 1.30851468703091  | 2.61173619669189  | 1.35891272415283  |
| H | 0.07003007064277  | 2.91338608686691  | 0.10834099292678  |
| H | -0.39762532188003 | 2.14700660385527  | 1.63936869263356  |
| C | -2.72908531173406 | -3.27217070047352 | -0.39344720172817 |
| C | -2.56138201865472 | -3.72228752114699 | 0.94063668352425  |
| C | -1.33999378316779 | -3.39951233074392 | 1.58595263321220  |
| C | -0.38499576622857 | -2.66846998430930 | 0.92062862686948  |
| C | -1.72731823552158 | -2.55442880267557 | -0.99673347753290 |
| H | -3.64127199098345 | -3.48948482443636 | -0.94796399123533 |
| H | -1.14466740287540 | -3.72967194950513 | 2.60615344126051  |
| H | 0.57515248526101  | -2.39643811890169 | 1.36050518086766  |
| H | -1.81320288816352 | -2.19412120711420 | -2.02244625743553 |
| N | -3.52457895892138 | -4.42792493487880 | 1.56983671175057  |
| N | -0.57410950826707 | -2.24593505712471 | -0.35281028954424 |
| H | -3.38354584673627 | -4.79000421418032 | 2.50506351215992  |
| H | -4.37783972633554 | -4.69183817119867 | 1.09238450231065  |
| O | 5.17842227955314  | 0.60784815931055  | 4.99527503717426  |
| C | 4.76938211711331  | 1.17083620238336  | 6.24908171952976  |
| H | 4.42304748327084  | 2.20831904392641  | 6.12250037911146  |
| H | 3.97650007897907  | 0.56517168009231  | 6.71497263440868  |
| H | 5.66171157870361  | 1.15632756613995  | 6.88237235506476  |

## 3c' +AP

|   |                  |                   |                   |
|---|------------------|-------------------|-------------------|
| P | 7.32845147777220 | 11.26237130573752 | 18.03613673992255 |
| N | 6.57798623487643 | 10.87745793785895 | 20.81461036136568 |
| N | 6.66611284623308 | 9.05694538002534  | 19.61362497784105 |
| N | 8.53732299804308 | 10.48624102114348 | 17.26526801451478 |
| N | 9.44074629193587 | 12.60813213680944 | 17.58181678956276 |
| C | 6.88245690059364 | 10.39729698676124 | 19.58536330732350 |
| C | 6.72909124586746 | 12.25509390890419 | 21.27760616074239 |
| H | 6.32110101809425 | 12.95071006455942 | 20.53600100467373 |
| C | 6.20446245285786 | 9.83225385331789  | 21.62839516481660 |
| C | 6.25671169749337 | 8.69255989608183  | 20.87612785008394 |
| C | 6.73995539618623 | 8.13439422048748  | 18.47005546242433 |
| H | 7.59704899171272 | 8.39832664601742  | 17.84145861729234 |
| C | 5.79234409147926 | 11.30741795363756 | 17.14691407113433 |
| C | 5.77450302576339 | 10.96369531154277 | 15.78528893525616 |
| H | 6.68247188765395 | 10.60195500410281 | 15.30223372089588 |

|   |                   |                   |                   |
|---|-------------------|-------------------|-------------------|
| C | 4.58436406760824  | 11.08496148423128 | 15.06991908815907 |
| H | 4.55536604223037  | 10.80899947503075 | 14.01578527842796 |
| C | 3.43160597865040  | 11.56070533369281 | 15.70232042020334 |
| H | 2.50491614084997  | 11.65909618729089 | 15.13595231396037 |
| C | 3.45315507946921  | 11.90470738775573 | 17.05894261415642 |
| H | 2.54935941244902  | 12.27131443468506 | 17.54558795895552 |
| C | 4.63031651799253  | 11.77147896645271 | 17.78916280097770 |
| H | 4.63854758454795  | 12.03669229948764 | 18.84784809605245 |
| C | 8.16188039002192  | 12.92566086709762 | 18.25116349319078 |
| H | 8.36433259219351  | 13.10326651813106 | 19.31541686849898 |
| C | 7.36367742495171  | 14.04566651067513 | 17.64786039134733 |
| C | 7.14948378518282  | 14.11557609925882 | 16.26393311233800 |
| H | 7.63772675156396  | 13.40406093289495 | 15.59538179211043 |
| C | 6.31936410802279  | 15.10273092210101 | 15.73572031571027 |
| H | 6.16112056425936  | 15.15925642276081 | 14.65868665674217 |
| C | 5.69417647554798  | 16.02194904921197 | 16.58431605204228 |
| H | 5.04492432601273  | 16.79283490036715 | 16.16869952139503 |
| C | 5.91784833177521  | 15.96689710303371 | 17.96175808257512 |
| H | 5.4534345498387   | 16.69968831946534 | 18.62199871688772 |
| C | 6.75375438535672  | 14.98246876699772 | 18.49180959137624 |
| H | 6.95171477361230  | 14.96223082222882 | 19.56599449873128 |
| C | 10.41831137864516 | 13.68820419387862 | 17.45687820564691 |
| C | 9.58956712189105  | 11.32453334928566 | 17.19436346257468 |
| C | 10.87053183152805 | 10.78563603020268 | 16.72151254935084 |
| C | 10.87482036709340 | 9.89041237888566  | 15.63925212102894 |
| H | 9.94484075006671  | 9.67039615077488  | 15.11656237225411 |
| C | 12.06431560709119 | 9.29312911099922  | 15.23682205846426 |
| H | 12.10998175230591 | 8.60854726457106  | 14.39129999607609 |
| C | 13.22483965376393 | 9.57469629498957  | 15.95423608803502 |
| C | 13.24337045540243 | 10.44056536908923 | 17.04394034550666 |
| H | 14.17737446357418 | 10.60983641688698 | 17.57672437099093 |
| C | 12.05674887255040 | 11.05912752667732 | 17.42313947103710 |
| H | 12.04491699642743 | 11.71110443006959 | 18.29552952027139 |
| H | 11.16504830263118 | 13.42047593543036 | 16.70439790370028 |
| H | 9.89545477964258  | 14.59774242715694 | 17.13567257573007 |
| H | 10.91467494690212 | 13.88011082958058 | 18.41922141527514 |
| H | 6.85872647379860  | 7.11843827741269  | 18.85847761236868 |
| H | 5.81137340963231  | 8.19959412614346  | 17.88863916148682 |
| H | 6.03134207662849  | 7.66405596136336  | 21.13321099919003 |
| H | 5.93382924838311  | 9.98209175355582  | 22.66716577622572 |
| H | 6.16920130200032  | 12.36959964616655 | 22.21073038329276 |
| H | 7.79368287158846  | 12.45341155132907 | 21.45299002834935 |
| C | 11.41217909602734 | 9.40995666076773  | 20.60809904193445 |
| C | 12.28004695219920 | 10.36686461204930 | 21.18662747518140 |
| C | 11.78467751283333 | 11.69094449652503 | 21.27567601939487 |
| C | 10.51043653225272 | 11.96869725489019 | 20.81149101678670 |
| C | 10.15916002655294 | 9.80444731192340  | 20.17492555589755 |
| H | 11.72353158211167 | 8.37029247291414  | 20.50071115398484 |
| H | 12.38956217989759 | 12.48426913542846 | 21.71683535548413 |
| H | 10.13466555561058 | 12.99458476667616 | 20.89389307620942 |
| H | 9.50104504484779  | 9.06323475189295  | 19.71461233882044 |
| N | 13.52282875369967 | 10.04005379571538 | 21.61146886226769 |
| N | 9.67488553023152  | 11.06241470777072 | 20.25789604507134 |
| H | 14.10220075144826 | 10.71311312742418 | 22.09874697278578 |
| H | 13.83634572030233 | 9.07683744865980  | 21.61573318686877 |
| N | 14.49957437534671 | 8.90223073119148  | 15.55318729493380 |
| O | 15.48639912119726 | 9.12639260790113  | 16.25206865326279 |
| O | 14.45607594594639 | 8.17598275397929  | 14.56405978256739 |

TS1 Y=NO<sub>2</sub>

|   |            |            |            |
|---|------------|------------|------------|
| P | -1.2076240 | -0.3528814 | -0.5044892 |
| N | -2.1400666 | -0.3656613 | 2.2364199  |
| N | -1.7482445 | -2.3510142 | 1.4175702  |
| N | 0.0354217  | -1.2523851 | -1.1089609 |
| N | 0.9235743  | 0.8739937  | -1.0996569 |
| C | -1.7312457 | -1.0254313 | 1.1236154  |
| C | -2.3386164 | 1.0789031  | 2.3902463  |
| H | -3.2555541 | 1.2425253  | 2.9664804  |
| C | -2.3937675 | -1.2780806 | 3.2369481  |
| C | -2.1501269 | -2.5201587 | 2.7229335  |
| C | -1.4981624 | -3.4612115 | 0.4833477  |
| H | -0.7154932 | -3.1694658 | -0.2249160 |
| C | -2.6914445 | -0.5412449 | -1.4848048 |
| C | -2.5378008 | -0.6165007 | -2.8810505 |
| H | -1.5411272 | -0.6385564 | -3.3231788 |
| C | -3.6681975 | -0.6824913 | -3.6924092 |
| H | -3.5560068 | -0.7512776 | -4.7743386 |
| C | -4.9441420 | -0.6658567 | -3.1190951 |

|   |            |            |            |
|---|------------|------------|------------|
| H | -5.8255749 | -0.7175548 | -3.7583613 |
| C | -5.0977649 | -0.5892785 | -1.7309551 |
| H | -6.0948878 | -0.5840088 | -1.2908367 |
| C | -3.9739643 | -0.5254917 | -0.9101718 |
| H | -4.1033653 | -0.4664386 | 0.1717483  |
| C | -0.2433639 | 1.1352405  | -0.2337735 |
| H | 0.3681220  | 0.8249543  | 1.0568341  |
| C | -0.8107603 | 2.5122942  | -0.2130741 |
| C | -2.0167415 | 2.8303737  | -0.8615767 |
| H | -2.5315469 | 2.0760292  | -1.4563449 |
| C | -2.5598241 | 4.1142037  | -0.7710127 |
| H | -3.4969227 | 4.3413029  | -1.2797985 |
| C | -1.8954602 | 5.1086457  | -0.0520952 |
| H | -2.3146288 | 6.1127385  | 0.0108939  |
| C | -0.6814480 | 4.8143401  | 0.5764781  |
| H | -0.1494863 | 5.5911056  | 1.1262423  |
| C | -0.1515156 | 3.5276261  | 0.5043574  |
| H | 0.7996087  | 3.3127572  | 0.9946338  |
| C | 1.7181170  | 1.9788901  | -1.6353243 |
| C | 1.0628577  | -0.4288354 | -1.4156129 |
| C | 2.2650818  | -0.9884988 | -2.0464462 |
| C | 2.1140416  | -2.0272149 | -2.9824873 |
| H | 1.1143969  | -2.3720869 | -3.2422332 |
| C | 3.2312782  | -2.6024458 | -3.5776954 |
| H | 3.1460586  | -3.3955805 | -4.3186624 |
| C | 4.4936608  | -2.1453346 | -3.2074078 |
| C | 4.6766330  | -1.1359222 | -2.2663399 |
| H | 5.6872642  | -0.8292581 | -2.0026255 |
| C | 3.5538772  | -0.5533530 | -1.6871609 |
| H | 3.6852097  | 0.2215249  | -0.9324530 |
| H | 2.3376755  | 1.6082231  | -2.4564338 |
| H | 1.0406774  | 2.7539889  | -2.0137868 |
| H | 2.3608623  | 2.4238725  | -0.8638479 |
| H | -1.1822854 | -4.3324136 | 1.0652276  |
| H | -2.4244936 | -3.6950311 | -0.0565306 |
| H | -2.2408077 | -3.5019310 | 3.1727146  |
| H | -2.7347911 | -0.9732380 | 4.2192290  |
| H | -1.4873856 | 1.5179015  | 2.9216384  |
| H | -2.4381805 | 1.5542539  | 1.4099533  |
| C | 2.4233917  | -1.1779661 | 3.1301601  |
| C | 2.7219350  | -0.3046873 | 4.2109530  |
| C | 2.1416509  | 0.9912816  | 4.1686143  |
| C | 1.3418090  | 1.3438376  | 3.1052424  |
| C | 1.6075384  | -0.7430982 | 2.1103971  |
| H | 2.8441136  | -2.1827343 | 3.0961668  |
| H | 2.3329268  | 1.7124159  | 4.9628932  |
| H | 0.8995263  | 2.3384102  | 3.0416390  |
| H | 1.3664137  | -1.3866706 | 1.2624832  |
| N | 3.5154445  | -0.6865462 | 5.2285981  |
| N | 1.0652591  | 0.4968467  | 2.0867349  |
| H | 3.7495125  | -0.0503551 | 5.9823329  |
| H | 3.9566627  | -1.5989794 | 5.2421390  |
| N | 5.6989402  | -2.7690628 | -3.8328280 |
| O | 6.7944029  | -2.3554602 | -3.4580701 |
| O | 5.4988735  | -3.6467865 | -4.6690196 |

INT1 Y=NO<sub>2</sub>

|   |                  |                   |                   |
|---|------------------|-------------------|-------------------|
| P | 7.55752638944025 | 11.37339221903174 | 17.75696087180255 |
| N | 6.95770742326850 | 11.64998962663642 | 20.62154199997122 |
| N | 6.78225841218054 | 9.61052977186925  | 19.86269123652506 |
| N | 9.02082986880478 | 10.73263853659977 | 17.30638536265348 |
| N | 9.39452795591136 | 12.99876697186019 | 17.21781030315378 |
| C | 6.96756197861480 | 10.91111268849753 | 19.47476190047986 |
| C | 7.12109931459652 | 13.10016345026479 | 20.74343683503284 |
| H | 6.32176277866343 | 13.62073096452656 | 20.20363691425196 |
| C | 6.73086164476739 | 10.82711119767109 | 21.70123170354992 |
| C | 6.62768639377413 | 9.55044173417034  | 21.22892167409346 |
| C | 6.69752339192777 | 8.43128668175370  | 18.99624700216679 |
| H | 7.45266545593849 | 8.48973573262432  | 18.20686102568944 |
| C | 6.24442818731611 | 10.61947205220448 | 16.78365378907095 |
| C | 6.54534813787560 | 10.14306325092596 | 15.49794666310772 |
| H | 7.57344770429621 | 10.17477327656201 | 15.13559853633216 |
| C | 5.52552728090577 | 9.63478173461394  | 14.69366007360599 |
| H | 5.75562277991319 | 9.25911020245892  | 13.69630665535669 |
| C | 4.20648720996965 | 9.61816957196595  | 15.15877326165225 |
| H | 3.41074239897874 | 9.22882368583041  | 14.52298229855700 |
| C | 3.90132254740449 | 10.11011993858268 | 16.43235559241184 |
| H | 2.87051036539893 | 10.10797060568583 | 16.78777420177481 |

|   |                   |                   |                    |
|---|-------------------|-------------------|--------------------|
| C | 4.91709320395126  | 10.61058855290540 | 17.24509301474005  |
| H | 4.67317443543783  | 11.00625768481011 | 18.23373218626579  |
| C | 8.05315092411807  | 13.03056746445926 | 17.66351342241235  |
| H | 9.82945629339501  | 9.19038863670402  | 17.60613707768750  |
| C | 7.22103422685866  | 14.20932657276420 | 17.83025921142797  |
| C | 5.83518732447458  | 14.10386671802212 | 17.57154730979233  |
| H | 5.44097694087223  | 13.19915184525711 | 17.10865451265834  |
| C | 4.96576171440875  | 15.16003544068864 | 17.84373877675128  |
| H | 3.90215403321359  | 15.05095924729593 | 17.62835761720534  |
| C | 5.45729469564971  | 16.36189704879253 | 18.35645343809486  |
| H | 4.78190855744420  | 17.19336138282281 | 18.55727267707524  |
| C | 6.82886866794909  | 16.49124325736313 | 18.60214297545065  |
| H | 7.22304958424246  | 17.42459424854179 | 19.00563504868675  |
| C | 7.69828450143242  | 15.43098532735862 | 18.35710466577312  |
| H | 8.75140069676138  | 15.54839311101521 | 18.61084451080175  |
| C | 10.08298837824063 | 14.19980877182454 | 16.72828518344972  |
| C | 9.89626285052634  | 11.75282332098406 | 17.08036856072052  |
| C | 11.28641722059636 | 11.45412777419539 | 16.72762275434318  |
| C | 11.53709162931088 | 10.50444604071723 | 15.71866457436738  |
| H | 10.70850822385204 | 10.14037275905289 | 15.11168904556557  |
| C | 12.81872423969984 | 10.01383348765433 | 15.51315968920853  |
| H | 13.03068457205614 | 9.25595196852888  | 14.76126988589111  |
| C | 13.85284365057204 | 10.50312087777139 | 16.31004987222530  |
| C | 13.65778563324127 | 11.51753697165007 | 17.24493941767700  |
| H | 14.50475682955827 | 11.89092949275170 | 17.81900252788542  |
| C | 12.36381310717933 | 11.98608995834152 | 17.45885404109674  |
| H | 12.18375549472834 | 12.72825734078768 | 18.237111357247614 |
| H | 10.87019481080764 | 13.89778831618271 | 16.03168577929320  |
| H | 9.35639646823619  | 14.83313506115974 | 16.20662211753354  |
| H | 10.52568106397148 | 14.77107432175763 | 17.55333889729537  |
| H | 6.88192458720375  | 7.54506760914573  | 19.61173031649279  |
| H | 5.70465325414236  | 8.36608175334928  | 18.53520922547589  |
| H | 6.45885664284936  | 8.61567058674567  | 21.75070616214178  |
| H | 6.65916609487837  | 11.21361479999353 | 22.71112692479427  |
| H | 7.08149613602286  | 13.35514760625043 | 21.80636556473580  |
| H | 8.08611482572280  | 13.39477095844400 | 20.31924118501246  |
| C | 11.54638584582242 | 6.56472758055842  | 16.50659195068542  |
| C | 12.71761905720827 | 6.69082674814417  | 17.30748322264729  |
| C | 12.71586740954411 | 7.70654276826399  | 18.30578387832488  |
| C | 11.63264761000345 | 8.53543078751480  | 18.43273475029867  |
| C | 10.50232544327852 | 7.43444312718918  | 16.68563696534367  |
| H | 11.47867871587207 | 5.79624709467321  | 15.73748612535868  |
| H | 13.57511791465237 | 7.84155393234736  | 18.96140598075484  |
| H | 11.60314093674021 | 9.34832156179931  | 19.15570963054686  |
| H | 9.60590109356644  | 7.40068445747767  | 16.06839042229229  |
| N | 13.77382093677475 | 5.88698153768492  | 17.13187799947396  |
| N | 10.54246968931745 | 8.40311981959903  | 17.63503142250299  |
| H | 14.63666765811196 | 6.03058601022332  | 17.64586698690393  |
| H | 13.79612678025595 | 5.19984362354596  | 16.38604545846303  |
| N | 15.18569785694900 | 9.86562163035191  | 16.21616071898874  |
| O | 15.21634727933469 | 8.72710499835580  | 15.73028295919131  |
| O | 16.14810699904234 | 10.48458931184489 | 16.65999665447684  |

TS2 Y=NO<sub>2</sub>

|   |                   |                   |                   |
|---|-------------------|-------------------|-------------------|
| P | -1.06527892233249 | 0.50812771882398  | -0.15688686206198 |
| N | -2.23892046084104 | -0.61071072759802 | 2.62613851227283  |
| N | -2.25084744260930 | -2.26040649031187 | 1.24319245325516  |
| N | 0.41229439238583  | -0.28218934139403 | -0.39347492101167 |
| N | 0.84405052049950  | 1.78920080371251  | -1.32640135582676 |
| C | -1.62160632330947 | -1.07399457739264 | 1.49846429481549  |
| C | -1.87752499384833 | 0.62954650269583  | 3.30874048380625  |
| H | -2.78504666541825 | 1.15554253142079  | 3.62778329209246  |
| C | -3.21958123975989 | -1.48220558636308 | 3.06140633636487  |
| C | -3.23065950372045 | -2.52590995448043 | 2.18019681792565  |
| C | -1.97341640985883 | -3.10353215993550 | 0.08376732582136  |
| H | -1.05096663768204 | -2.75146189086979 | -0.38853956403200 |
| C | -2.48424398757199 | -0.08849469260191 | -1.10894455360601 |
| C | -2.31093044014835 | -0.54945157128720 | -2.42331985643952 |
| H | -1.31553646107658 | -0.58021787029743 | -2.86809496122898 |
| C | -3.41982901507560 | -0.97165687849501 | -3.15741021215000 |
| H | -3.28783255878997 | -1.33763255750725 | -4.17609177483202 |
| C | -4.69741451913457 | -0.91646429570987 | -2.59077979093964 |
| H | -5.56293124597363 | -1.23798239663005 | -3.17087476952904 |
| C | -4.86946388629481 | -0.44801774705049 | -1.28412841785148 |
| H | -5.86742630086101 | -0.39627104162207 | -0.84814496948830 |
| C | -3.76389105985561 | -0.04088926524250 | -0.53729168173893 |
| H | -3.89971361405021 | 0.32209451181586  | 0.48230772242763  |
| C | -0.50374974682190 | 1.92206791519823  | -1.14800680415394 |

|   |                   |                   |                   |
|---|-------------------|-------------------|-------------------|
| H | 0.50335366792021  | -1.49772556832145 | 1.64837135035292  |
| C | -1.22325531486205 | 3.15378190268303  | -1.44209852380839 |
| C | -2.45573169403370 | 3.09098415342680  | -2.12611022046909 |
| H | -2.83098362326373 | 2.13051769325056  | -2.47387561839420 |
| C | -3.16691403698205 | 4.25684805605451  | -2.39722964501499 |
| H | -4.10522633742854 | 4.20049304071013  | -2.94923659372735 |
| C | -2.67931381273786 | 5.49487253304182  | -1.96905399181915 |
| H | -3.24232991105584 | 6.40492867495517  | -2.17804599016224 |
| C | -1.46877521460448 | 5.56808186603818  | -1.27099938400843 |
| H | -1.09517851077015 | 6.53144547847825  | -0.92339921777860 |
| C | -0.74067769931634 | 4.41069973598897  | -1.01609963059423 |
| H | 0.18669757137627  | 4.47590975676198  | -0.44614278526183 |
| C | 1.69494200032614  | 2.76247766799767  | -2.03102911024220 |
| C | 1.30089892646275  | 0.52430291672795  | -0.91503283968447 |
| C | 2.71862383601360  | 0.12323469663142  | -0.90667239230623 |
| C | 3.01596719879502  | -1.21506212070172 | -1.22220982941204 |
| H | 2.23039188386639  | -1.85418973434976 | -1.62282792935587 |
| C | 4.28773692440731  | -1.72563539279891 | -0.99896678360522 |
| H | 4.54356803003894  | -2.75697560852816 | -1.23713715859954 |
| C | 5.24005643455136  | -0.89650106938193 | -0.40884622428975 |
| C | 4.99567538957119  | 0.44714524988778  | -0.13671658445845 |
| H | 5.77574576326545  | 1.06036276909985  | 0.31210758114703  |
| C | 3.73224910598318  | 0.96251869355408  | -0.40995688215814 |
| H | 3.52402357380755  | 2.00345683000983  | -0.16574990825369 |
| H | 2.46969789377402  | 2.21740131955006  | -2.58041194317507 |
| H | 1.07133642653819  | 3.32260478128409  | -2.73519959692776 |
| H | 2.16698925313389  | 3.46867115579901  | -1.33718737683597 |
| H | -1.85906609530857 | -4.14754311340254 | 0.40149466340296  |
| H | -2.79503773890828 | -3.03672581418025 | -0.64105656185428 |
| H | -3.84280453640798 | -3.42044849068672 | 2.15589769589713  |
| H | -3.81220405667176 | -1.30454413372315 | 3.95180097219643  |
| H | -1.25741273037545 | 0.41852961229045  | 4.18985076975973  |
| H | -1.32145366608752 | 1.26283553255499  | 2.60827293984937  |
| C | 3.03681256317463  | -3.56928768433328 | 2.16033739225217  |
| C | 4.05670545588290  | -2.62727323401580 | 2.47800589705110  |
| C | 3.67711957495751  | -1.25622427513329 | 2.54155132638398  |
| C | 2.38702477410572  | -0.89148730704950 | 2.26063618873584  |
| C | 1.76309454969934  | -3.13541377277907 | 1.89545011391585  |
| H | 3.25782166032818  | -4.63499766147762 | 2.11520250656721  |
| H | 4.40827403286010  | -0.49223191637808 | 2.80046538029215  |
| H | 2.05461186593081  | 0.14354740921028  | 2.27525643924841  |
| H | 0.95682935992431  | -3.81746773086089 | 1.63435614016078  |
| N | 5.32232132944497  | -3.00872983614829 | 2.69992758747125  |
| N | 1.44774578245920  | -1.81755421093617 | 1.94254081697618  |
| H | 6.06061560059710  | -2.32897477269760 | 2.86206489754441  |
| H | 5.59916311038085  | -3.98345031139835 | 2.64945624208372  |
| N | 6.50819807712156  | -1.50505304887847 | 0.04972491158555  |
| O | 7.06754440829981  | -0.94939177935244 | 1.00563631910019  |
| O | 6.87788075830237  | -2.54083733064075 | -0.49382797007178 |

INT2 Y=NO<sub>2</sub>

|   |                   |                   |                   |
|---|-------------------|-------------------|-------------------|
| P | 7.68970834471257  | 11.72687719641231 | 18.20474796190694 |
| N | 8.65698578195721  | 10.45357137233306 | 17.64802423061402 |
| N | 9.61377558079900  | 12.32797099920057 | 16.66427078654563 |
| C | 5.99726200409988  | 11.47829785825660 | 17.60568209225088 |
| C | 5.73191978368981  | 11.05541062403965 | 16.29254859144569 |
| H | 6.55090128850897  | 10.85691628665042 | 15.60079939518226 |
| C | 4.41142301188612  | 10.88380660005804 | 15.88463184341856 |
| H | 4.19743552336891  | 10.55109802613429 | 14.86845059607185 |
| C | 3.36179161511175  | 11.13606870068266 | 16.77640480883153 |
| H | 2.33030039522526  | 11.00041470115970 | 16.44939187014572 |
| C | 3.62798512909372  | 11.55131104793229 | 18.08264827197330 |
| H | 2.80881110743637  | 11.73661046378326 | 18.77766386680072 |
| C | 4.94832942242461  | 11.71883100740862 | 18.50510363743239 |
| H | 5.16553453915049  | 12.03284943162259 | 19.52693712444329 |
| C | 8.51748640872269  | 12.93471000998790 | 17.13938515364499 |
| C | 8.18671305804955  | 14.33994214890711 | 16.98935687722848 |
| C | 6.82756086243070  | 14.69634997254771 | 16.84844190240958 |
| H | 6.06769382849395  | 13.91707071016739 | 16.81042631690708 |
| C | 6.46071284210086  | 16.03190693542073 | 16.72318753620623 |
| H | 5.41055712084834  | 16.29338353229916 | 16.59271216682244 |
| C | 7.43469316094023  | 17.03453739368423 | 16.76613693530936 |
| H | 7.14399716205214  | 18.08163849108908 | 16.67633801842229 |
| C | 8.78173518243232  | 16.69611349670035 | 16.93087421051118 |
| H | 9.53991727492920  | 17.47756983298041 | 16.98331177959759 |
| C | 9.15993145024248  | 15.36160573709249 | 17.03330380639277 |
| H | 10.20739071020411 | 15.11466955246597 | 17.19264911678722 |
| C | 10.62695130141616 | 12.95442038627135 | 15.80910718134607 |

|   |                   |                   |                   |
|---|-------------------|-------------------|-------------------|
| C | 9.67241571606453  | 10.92713776496017 | 17.00124483875508 |
| C | 10.84138827014245 | 10.11434565839335 | 16.62402021894866 |
| C | 10.62933795087757 | 8.89614228360592  | 15.95881736668234 |
| H | 9.61569240933770  | 8.59392126456641  | 15.69671337730728 |
| C | 11.71090995740659 | 8.08146801068783  | 15.63863490546659 |
| H | 11.58386179358819 | 7.13629347057936  | 15.11378754059415 |
| C | 12.98883211920834 | 8.49392076521682  | 16.00898949834265 |
| C | 13.22140382691645 | 9.68315396253697  | 16.69597728248048 |
| H | 14.23750017735814 | 9.94402093492530  | 16.98674249029761 |
| C | 12.13834004609597 | 10.50176779358276 | 17.00285329771904 |
| H | 12.27833376120995 | 11.41354179222076 | 17.58674103918342 |
| H | 11.01557939112390 | 12.19732243809126 | 15.12113383716432 |
| H | 10.16296718071758 | 13.77090744993299 | 15.24659695729727 |
| H | 11.45252297939361 | 13.34039850856192 | 16.41973623649733 |
| C | 9.86130252383033  | 11.26831869351915 | 21.30673082602685 |
| C | 9.36996937100162  | 12.47311970462594 | 21.85101302184319 |
| C | 9.67052331879237  | 13.65590942247141 | 21.14272038702419 |
| C | 10.40840894306791 | 13.57289754555739 | 19.97116831912652 |
| C | 10.58724693695633 | 11.30436702055374 | 20.12513673275958 |
| H | 9.67827585907768  | 10.31535289241016 | 21.80558150926453 |
| H | 9.33716228002647  | 14.62692867446498 | 21.51236243440630 |
| H | 10.65698334845717 | 14.49289070737360 | 19.43546322097819 |
| H | 10.96628123950349 | 10.36943047128092 | 19.70336203812921 |
| N | 8.60702948092997  | 12.49031833313472 | 22.98678764630485 |
| N | 10.86486595463558 | 12.42551323216414 | 19.43019335623263 |
| H | 8.46386917567791  | 13.37166320301339 | 23.46639663780125 |
| H | 8.59435581635861  | 11.6676549222061  | 23.57885718779931 |
| N | 14.15013919538637 | 7.62358214477703  | 15.66826794048115 |
| O | 13.90831828684764 | 6.57239196829626  | 15.07560559779571 |
| O | 15.26581547967775 | 8.02125569098095  | 16.00374125863332 |

TS3 Y=NO<sub>2</sub>

|   |                   |                   |                   |
|---|-------------------|-------------------|-------------------|
| P | -1.61483513121416 | -0.83096952029369 | 0.55576979654866  |
| N | -0.41873733772649 | -1.89806039644146 | -0.05850606589546 |
| N | 0.40674563101250  | 0.16211044032639  | -0.75558419728082 |
| C | -2.93743437891210 | -1.01333740783026 | -0.70853165566355 |
| C | -2.67939576864556 | -1.13733031656467 | -2.08180497823610 |
| H | -1.65342473804660 | -1.15410005608419 | -2.45208826472158 |
| C | -3.73970518070073 | -1.25282388279826 | -2.97809685331526 |
| H | -3.54051489850673 | -1.35183507126072 | -4.04580466364899 |
| H | -5.88535365392360 | -1.33963921102735 | -3.21378415311051 |
| C | -5.05859441484825 | -1.24683034010095 | -2.50872969924315 |
| C | -5.31827204827198 | -1.13459107760674 | -1.14155210156511 |
| H | -6.34514097447807 | -1.14575713522038 | -0.77493927107649 |
| C | -4.25883581147678 | -1.02051995008785 | -0.23816608897439 |
| H | -4.45509568130735 | -0.94194946006528 | 0.83273087648117  |
| C | -0.66672068599903 | 0.62568384913901  | -0.09552855447308 |
| C | -1.10591929088128 | 2.01525242336278  | -0.11059346653995 |
| C | -2.47522597844816 | 2.30082832732576  | -0.27880332762349 |
| H | -3.18290494203803 | 1.48881653076742  | -0.43719846673688 |
| C | -2.92042562972901 | 3.62095030233764  | -0.28678801853746 |
| H | -3.97929931790023 | 3.83140794559947  | -0.43767182105776 |
| C | -2.01616397195001 | 4.66843353853716  | -0.09760672286377 |
| H | -2.36926895897235 | 5.70014468456072  | -0.09444279618574 |
| C | 0.65842157445843  | 4.39381968021002  | 0.10262925326979  |
| H | 0.04458686536101  | 5.20850911938802  | 0.27749667613664  |
| C | -0.20407074894684 | 3.08019058242261  | 0.09285976860699  |
| H | 0.84097320709246  | 2.86463867130277  | 0.30991691200023  |
| C | 1.27107882538632  | 0.97817908649959  | -1.61675836411982 |
| C | 0.54870684867618  | -1.27106325502756 | -0.62852658398991 |
| C | 1.74518684092376  | -1.96368317379526 | -1.14227543795587 |
| C | 1.56118539541953  | -3.21899689822887 | -1.74808107393733 |
| H | 0.55150048605255  | -3.61511037250722 | -1.85033025477542 |
| C | 2.65503849305678  | -3.94702159592583 | -2.20279548423070 |
| H | 2.54007968149570  | -4.91621642309208 | -2.68496503273696 |
| C | 3.93081307267419  | -3.41505486828571 | -2.02800244895051 |
| C | 4.14706592989189  | -2.18592013872532 | -1.41112835353385 |
| H | 5.16547313948758  | -1.82429483783965 | -1.28102680970625 |
| C | 3.04552890470835  | -1.45774713025619 | -0.97204115740315 |
| H | 3.21027890829396  | -0.50469948298915 | -0.47055057005025 |
| H | 1.63179711861759  | 0.35704576157193  | -2.44284962702882 |
| H | 0.68285887532549  | 1.81312806818660  | -2.01116527451021 |
| H | 2.13156806029150  | 1.37479839874141  | -1.06404889276589 |
| C | 0.18707651845529  | 1.59254802250550  | 4.30672614425959  |
| C | 1.44819448775140  | 1.05313234013266  | 4.65631855056657  |
| C | 2.14255807019044  | 0.33936010030997  | 3.65224101031675  |
| C | 1.56553287318304  | 0.20953030924795  | 2.40052271036584  |
| C | -0.30274120797991 | 1.39887624588981  | 3.02771680165964  |

|   |                   |                   |                   |
|---|-------------------|-------------------|-------------------|
| H | -0.40029537215610 | 2.15006091453566  | 5.03728038509578  |
| H | 3.11544891686304  | -0.10899439363013 | 3.85639485816213  |
| H | 2.08001202782997  | -0.34728915507545 | 1.61349881242535  |
| H | -1.27813786604913 | 1.80036973867511  | 2.73947414252847  |
| N | 1.97527944096832  | 1.23059752167833  | 5.89543694516585  |
| N | 0.37112965649323  | 0.72667543148195  | 2.07896468552976  |
| H | 2.82903998817154  | 0.75986475104621  | 6.16729950297582  |
| H | 1.42820704554259  | 1.65565297858064  | 6.63328549923508  |
| N | 5.10851668053464  | -4.19118209169691 | -2.50879980023860 |
| O | 6.21956504003390  | -3.69091271004380 | -2.33058642499193 |
| O | 4.88390853378217  | -5.27467541186215 | -3.04641057365505 |

4c'

|   |                   |                   |                   |
|---|-------------------|-------------------|-------------------|
| P | 11.97426706867623 | -1.09402069795770 | 20.49172418589573 |
| N | 13.25721272354981 | -0.84718560348265 | 21.58613798317315 |
| N | 11.55320820323638 | 0.15776869403876  | 22.82562211440796 |
| C | 12.17680068479908 | 0.29858515891464  | 19.34161961443412 |
| C | 13.11029639709717 | 1.32849082880446  | 19.53416104867441 |
| H | 13.78380225252347 | 1.29585632653203  | 20.39067958938691 |
| C | 13.17575979295295 | 2.38514511706231  | 18.62668215148335 |
| H | 13.90585332185607 | 3.18236718139886  | 18.77226660974605 |
| H | 12.36129612051727 | 3.25227057493477  | 16.82311311800825 |
| C | 12.30812372183962 | 2.42322917892941  | 17.52976242301672 |
| C | 11.38647145352576 | 1.39270653344670  | 17.32648043210315 |
| H | 10.72059896493380 | 1.41512424573509  | 16.46329020135212 |
| C | 11.32984839834610 | 0.32551769493346  | 18.22232562617363 |
| H | 10.62171807619487 | -0.48908231922285 | 18.05370994771427 |
| C | 10.67896768937162 | -0.43465096613041 | 21.84925551384870 |
| C | 9.54495863766335  | 0.44204576889131  | 21.38010828742883 |
| C | 9.85209606227958  | 1.69420240541505  | 20.81732054673732 |
| H | 10.88928470445982 | 2.01419896680430  | 20.73593924906855 |
| C | 8.84179146287977  | 2.53800568792116  | 20.36297762383120 |
| H | 9.10599623399188  | 3.50300752167496  | 19.92996663589067 |
| C | 7.50273537661547  | 2.15210703378322  | 20.45881450237888 |
| H | 6.71268740261295  | 2.81099739045858  | 20.09797064789996 |
| C | 7.18471559539467  | 0.92178815661979  | 21.03282754164727 |
| H | 6.14293061838975  | 0.61575081183901  | 21.13275937185573 |
| C | 8.19567329490283  | 0.07617834523441  | 21.49529069721323 |
| H | 7.90620179274082  | -0.86619557962292 | 21.95864283628605 |
| C | 11.10969737996255 | 1.23364670924884  | 23.71815142887977 |
| C | 12.89446059608923 | -0.23452524742311 | 22.67051286859862 |
| C | 13.88375270665693 | 0.02137089021052  | 23.74142751878856 |
| C | 15.21800377092577 | 0.25296151896390  | 23.36547980995110 |
| H | 15.47291784424502 | 0.26253770079649  | 22.30655886610893 |
| C | 16.20004549243093 | 0.44977863540155  | 24.32958860197998 |
| H | 17.23787156002347 | 0.64029398164741  | 24.06211718104540 |
| C | 15.83720645939969 | 0.39386567305860  | 25.67397776282789 |
| C | 14.52923511086552 | 0.14454598072174  | 26.08033923350928 |
| H | 14.29972137148678 | 0.09416006381395  | 27.14311253053601 |
| C | 13.55264371728692 | -0.03628214836570 | 25.10558044414703 |
| H | 12.52969933371187 | -0.23928900100797 | 25.42076813334540 |
| H | 11.98030214532509 | 1.79774560759981  | 24.06487793137991 |
| H | 10.44733624932060 | 1.91543463881040  | 23.17242557685371 |
| H | 10.55930491200399 | 0.85495779360806  | 24.59435027074699 |
| C | 9.09622686640884  | -3.86695022525574 | 21.96015979676752 |
| C | 9.19367511833974  | -4.23486067850561 | 23.32687022482502 |
| C | 9.78983654682696  | -3.29111652996371 | 24.20190321053759 |
| C | 10.24094584625840 | -2.09008447509382 | 23.71377836299504 |
| C | 9.57861123244953  | -2.65434195162357 | 21.53895058117820 |
| H | 8.65482182702296  | -4.54221587697068 | 21.22810999725392 |
| H | 9.90422554402183  | -3.50619680922583 | 25.26362994690662 |
| H | 10.71559481452874 | -1.35038006716274 | 24.35065319449369 |
| H | 9.53963523094311  | -2.34727412687217 | 20.49701310852966 |
| N | 8.74400779895571  | -5.42373365950170 | 23.77052034704591 |
| N | 10.13863840761414 | -1.76361455279573 | 22.40259330314075 |
| H | 8.83052829879957  | -5.69002993405401 | 24.74419481644889 |
| H | 8.33607137160756  | -6.10161727152578 | 23.13766278015773 |
| N | 16.88271264740620 | 0.59941176834072  | 26.71362524245848 |
| O | 16.52548724974542 | 0.53075358478525  | 27.89068235183605 |
| O | 18.02787460798504 | 0.82282608138486  | 26.32213608706884 |

TS4 Y=NO<sub>2</sub>

|   |                  |                   |                   |
|---|------------------|-------------------|-------------------|
| P | 0.04038027409177 | -0.99434830909691 | -1.51048002830343 |
| N | 1.38429088361770 | -0.92656236728847 | -0.44192600747832 |
| N | 0.14640378555825 | 0.89810175309453  | 0.26055466935925  |
| C | 0.51722034448471 | 0.69233069507487  | -2.55486363907749 |
| C | 1.65562899839744 | 1.48438025892072  | -2.37785618121710 |
| H | 2.25440646502321 | 1.41095184933791  | -1.46959993964452 |

|   |                   |                   |                   |
|---|-------------------|-------------------|-------------------|
| C | 2.04605423587202  | 2.36944868049163  | -3.38494586765946 |
| H | 2.94404899132940  | 2.97422496019898  | -3.25369697060760 |
| H | 1.59471635920085  | 3.17356960540564  | -5.33758516864249 |
| C | 1.28894799700742  | 2.47919382085285  | -4.55453659745775 |
| C | 0.13902521530021  | 1.69972089801751  | -4.72107426763136 |
| H | -0.45192940822576 | 1.77994796500546  | -5.63402213376478 |
| C | -0.25438093792642 | 0.81475324073463  | -3.72025234343801 |
| H | -1.15095643321955 | 0.20601005392193  | -3.85314504859981 |
| C | -0.63182852916378 | 0.52160072004896  | -0.80483746299624 |
| C | -1.92102262628318 | 1.16537992018634  | -1.09569150229669 |
| C | -2.02032950952213 | 2.50403766359785  | -1.51070448165044 |
| H | -1.11667220792521 | 3.09512240849458  | -1.66016075315082 |
| C | -3.26789862053403 | 3.05784147293172  | -1.78372348937326 |
| H | -3.33760205129736 | 4.09203726095759  | -2.12160009772949 |
| C | -4.42496775193154 | 2.28816473724617  | -1.63581199363730 |
| H | -5.40222595439417 | 2.72641267692997  | -1.84960437490724 |
| C | -4.33419790950176 | 0.95753720620822  | -1.22394956127466 |
| H | -5.23527722152783 | 0.35424278150123  | -1.11091892401652 |
| C | -3.08571007195374 | 0.39127681603064  | -0.96470350609091 |
| H | -3.00814561888368 | -0.64553929952038 | -0.63764721387377 |
| C | 0.03477576634475  | 2.21833854526733  | 0.89389775230015  |
| C | 1.26097821043822  | 0.03688850244935  | 0.41370244053780  |
| C | 2.22495794498517  | 0.21788367202775  | 1.51854608356500  |
| C | 3.59645663902681  | 0.15359658381828  | 1.22865719108694  |
| H | 3.91896458962400  | 0.01399939653292  | 0.19719139331931  |
| C | 4.53383817926976  | 0.25607087597092  | 2.25212195849387  |
| H | 5.60429060096145  | 0.22102281511836  | 2.05728255090687  |
| C | 4.07932876447101  | 0.39923926154517  | 3.56081480846713  |
| C | 2.72440299630459  | 0.43568914961964  | 3.88080716918186  |
| H | 2.42242197038834  | 0.52544073247884  | 4.92280251532502  |
| C | 1.79344576597772  | 0.34877422900549  | 2.84951547868101  |
| H | 0.72890788160644  | 0.34771379931398  | 3.08754563282871  |
| H | 0.57938344886796  | 2.21788114171103  | 1.84008912596310  |
| H | 0.46527392820049  | 2.98819039970248  | 0.23764885783138  |
| H | -1.02094528563284 | 2.44591923080360  | 1.07529458799860  |
| C | -2.59396888749947 | -4.20482935203681 | 0.19247354942515  |
| C | -2.12253346545644 | -4.58267992992604 | 1.47245073362714  |
| C | -0.98950922939506 | -3.89337921447538 | 1.96691229596156  |
| C | -0.41029912157412 | -2.90000807681451 | 1.19998755715381  |
| C | -1.94361672755458 | -3.19823279852940 | -0.49514378727731 |
| H | -3.45151607832565 | -4.70729230409777 | -0.25630418394901 |
| H | -0.56412375867227 | -4.14796523557089 | 2.93833962360219  |
| H | 0.48145434108767  | -2.37711439193197 | 1.54974874991098  |
| H | -2.27465777858152 | -2.90524799026536 | -1.49590636945610 |
| N | -2.72992290677960 | -5.55791017726290 | 2.19329318498340  |
| N | -0.87637545123409 | -2.53530474550895 | -0.01058211784549 |
| H | -2.33602187051704 | -5.87846176081071 | 3.06875467226788  |
| H | -3.48500664698067 | -6.10324818683329 | 1.79729021024769  |
| N | 5.07802104682829  | 0.50508642600697  | 4.66231027609210  |
| O | 4.63911078075105  | 0.62023571589965  | 5.80684574983551  |
| O | 6.26650565547685  | 0.46986621750807  | 4.34639519409395  |

5c'

|   |                   |                   |                   |
|---|-------------------|-------------------|-------------------|
| P | 0.67569344852194  | -1.22335015820291 | -1.29259014946890 |
| N | 1.83203539682205  | -1.08748375493333 | -0.07980707517856 |
| N | 0.71628280306265  | 0.91222841452526  | 0.28319304898583  |
| C | 0.64969644369478  | 1.28126016349853  | -2.16660812657578 |
| C | 1.67138021410350  | 2.22919849016885  | -2.02153838117637 |
| H | 2.03570807925510  | 2.50513457041602  | -1.03372401486783 |
| C | 2.25403743759164  | 2.82640746828174  | -3.14131795670794 |
| H | 3.04496194214850  | 3.56437156291142  | -3.00433261018744 |
| H | 2.29184791742939  | 2.94514637197248  | -5.29807912945250 |
| C | 1.83464027831478  | 2.47869261572276  | -4.42521954267269 |
| C | 0.84060834550733  | 1.51034928482355  | -4.58491785181686 |
| H | 0.52331589776826  | 1.20810295413619  | -5.58331016605461 |
| C | 0.26472151575201  | 0.90968340109570  | -3.46736918937927 |
| H | -0.48177176691328 | 0.12724936993253  | -3.61270340466458 |
| C | 0.01266400288395  | 0.57550101572092  | -0.96631979375880 |
| C | -1.48638050769807 | 0.72427522538780  | -0.78956465540653 |
| C | -2.31959332414621 | 1.28320788488023  | -1.76724204421727 |
| H | -1.89262059851358 | 1.67650073329085  | -2.68805454006618 |
| C | -3.69970728351441 | 1.36578412390035  | -1.56840842028587 |
| H | -4.32736629854351 | 1.81010355547587  | -2.33869127692704 |
| C | -4.27165613522740 | 0.90356850247131  | -0.37975892864048 |
| H | -5.34808527375096 | 0.97760065136748  | -0.22252065936645 |
| C | -3.44778052997067 | 0.36943491029296  | 0.61480356794115  |
| H | -3.87687655484570 | 0.03098055996154  | 1.55892599090510  |
| C | -2.07314689766852 | 0.28218220707780  | 0.41085248949019  |

|   |                   |                   |                   |
|---|-------------------|-------------------|-------------------|
| H | -1.44258509976572 | -0.12635109636025 | 1.20154841530025  |
| C | 0.43993650919369  | 2.19830421296976  | 0.92557956574183  |
| C | 1.68060130402084  | 0.02066588814333  | 0.63033674562105  |
| C | 2.56780353893133  | 0.24286539255334  | 1.79347318311022  |
| C | 3.93627571489714  | -0.03362165871630 | 1.64046244794478  |
| H | 4.30572430900976  | -0.36849475082956 | 0.67204834683635  |
| C | 4.80558784722964  | 0.11749884162430  | 2.71622232225009  |
| H | 5.87288598366225  | -0.07557483595330 | 2.62350999009488  |
| C | 4.28504406502099  | 0.51937528239276  | 3.94439148108383  |
| C | 2.92901595046800  | 0.77337764383763  | 4.13209064975677  |
| H | 2.57050319435782  | 1.06792584557229  | 5.11673453669533  |
| C | 2.06930259900635  | 0.63988963921151  | 3.04522426027326  |
| H | 1.00384537379147  | 0.81999874832617  | 3.18525210094068  |
| H | 1.34089177767811  | 2.56765400549087  | 1.42723509706543  |
| H | 0.13683486237983  | 2.92061543433295  | 0.15878955668464  |
| H | -0.37681222827381 | 2.11812161793104  | 1.65711221227524  |
| C | -2.72907056747071 | -3.27889764708310 | -0.38378834388511 |
| C | -2.54961344632150 | -3.75899465355013 | 0.93897192597136  |
| C | -1.32037721672574 | -3.45218479362252 | 1.57892644164939  |
| C | -0.37039791166751 | -2.70968637352757 | 0.92077814679404  |
| C | -1.73224418851083 | -2.55136853711986 | -0.98189190804398 |
| H | -3.64653096227218 | -3.48272094550190 | -0.93465740138516 |
| H | -1.11461166906579 | -3.80588811389527 | 2.58910113650522  |
| H | 0.59465983590114  | -2.45338816365343 | 1.35805760722922  |
| H | -1.82765524121545 | -2.17094261323113 | -1.99937024202850 |
| N | -3.50588519883102 | -4.47723516227587 | 1.56099199097345  |
| N | -0.57019783479659 | -2.25845415356440 | -0.34292477705640 |
| H | -3.35858185798704 | -4.85632226966254 | 2.48881349395170  |
| H | -4.36670350611364 | -4.72612909382417 | 1.08849841155775  |
| N | 5.20875006299448  | 0.67369366408590  | 5.10324603231159  |
| O | 6.40034583150930  | 0.43827830456031  | 4.90636123945803  |
| O | 4.71166873690182  | 1.02504531716325  | 6.17390158387240  |

11' +CO<sub>2</sub>

|   |                   |                   |                   |
|---|-------------------|-------------------|-------------------|
| P | -0.17654108832808 | -0.53293832036996 | 0.89321475924637  |
| N | -1.07890444985458 | -0.25126508717020 | 2.35122382296477  |
| C | 0.75875485196879  | -2.03583237534946 | 1.36019938125695  |
| C | -1.72785301902202 | -1.01833542236136 | -0.05899732230103 |
| C | 0.70201135062976  | 0.95224946229382  | 0.64156561898176  |
| C | -2.29709069453553 | -0.67373318547264 | 2.21738777247513  |
| H | 1.82917793882072  | -1.83577605990798 | 1.23635522103753  |
| H | 0.54603414309920  | -2.28586806975890 | 2.40743207441820  |
| H | 0.47743332730347  | -2.87455485109674 | 0.70961567673817  |
| N | -2.71008556736517 | -1.21680150463216 | 1.01071202351166  |
| H | -1.52750274996026 | -1.97229884004221 | -0.57088989903213 |
| C | -2.13989046839920 | 0.05937780571142  | -1.06185175155116 |
| C | 1.38733676628036  | 0.61384553322598  | -0.54335563907364 |
| C | 0.43436483132205  | 2.27075149214995  | 1.29799466553779  |
| C | -3.27845469680888 | -0.61677853133598 | 3.35462219020167  |
| C | -4.09439596902219 | -1.49998639858844 | 0.67611993071203  |
| H | -1.30961906426025 | 0.23184776219198  | -1.75763515089807 |
| H | -3.02976364863426 | -0.23948940298633 | -1.63586010557501 |
| H | -2.36231029958600 | 1.00456999666446  | -0.54600189062069 |
| N | 0.91746285477644  | -0.56837452005028 | -1.00078735831644 |
| N | 2.39665339548318  | 1.32709868499161  | -1.16107404966619 |
| H | -0.07997087537874 | 2.07878616550765  | 2.25141960216852  |
| H | -0.26263849668569 | 2.88866042602624  | 0.69279760940447  |
| C | 1.69206498847819  | 3.10792574617304  | 1.54533242155293  |
| H | -2.77302175423652 | -0.18877577579024 | 4.22541400560164  |
| H | -4.15194895745767 | 0.00423253571166  | 3.10448785471114  |
| H | -3.65050985389028 | -1.61953967850356 | 3.61415446234915  |
| H | -4.12729464381694 | -2.22364696808393 | -0.14971057494575 |
| H | -4.60962787376029 | -1.94586790652953 | 1.53564830894947  |
| H | -4.65683345439766 | -0.60235287045878 | 0.36051697360145  |
| C | 1.73933921802678  | -1.36119006326782 | -1.89242529161328 |
| C | 3.19653940346318  | 2.28571771430356  | -0.39540415125454 |
| C | 3.17691787731900  | 0.64911925582050  | -2.20579019201516 |
| H | 2.36586558330369  | 2.56475929191758  | 2.23053752078612  |
| H | 1.40712094081299  | 4.04564978365771  | 2.05107187659567  |
| C | 2.45035322503629  | 3.45105618600942  | 0.26069904195009  |
| C | 2.37721317296627  | -0.43056159514232 | -2.92577243977950 |
| H | 1.11034978932401  | -2.11705764812858 | -2.38716603540882 |
| H | 2.53971931616918  | -1.92129086652854 | -1.35753696728782 |
| H | 3.92028220063289  | 2.70323940337654  | -1.11234089483679 |
| H | 3.78702228153315  | 1.75303472494157  | 0.37943923893070  |
| H | 4.08165188030357  | 0.18936073234476  | -1.75561066744268 |
| H | 3.52959937841217  | 1.41402556801457  | -2.91689295905645 |

|   |                   |                   |                   |
|---|-------------------|-------------------|-------------------|
| H | 1.76438667687666  | 3.90200353565104  | -0.47736197777413 |
| H | 3.21100474703091  | 4.21611839962889  | 0.48866276649425  |
| H | 3.04639522862791  | -0.97745690503437 | -3.60798629682908 |
| H | 1.58119969200591  | 0.03163631511966  | -3.53054162678232 |
| O | -3.23937111705550 | -3.21012733956871 | -2.62676311846665 |
| C | -2.12633788892420 | -3.57658296590048 | -2.61515754868689 |
| O | -1.01628842862683 | -3.94858336937415 | -2.60371091096340 |

11' +SO<sub>2</sub>

|   |                   |                   |                   |
|---|-------------------|-------------------|-------------------|
| P | -0.18833072168695 | -0.51244592977054 | 0.90118258985964  |
| N | -1.08915568106545 | -0.22776700301455 | 2.35620869101841  |
| C | 0.74042800411295  | -2.02382197871380 | 1.35365141114146  |
| C | -1.73273644943172 | -0.99602819101002 | -0.05603143093750 |
| C | 0.71017243510870  | 0.95817028494125  | 0.64294165841168  |
| C | -2.30533518390678 | -0.66094150502720 | 2.22227566723086  |
| H | 1.80845161573396  | -1.85166758492935 | 1.18023582664881  |
| H | 0.56543698812103  | -2.25267861888588 | 2.41280429617721  |
| H | 0.40899206800510  | -2.86623930117571 | 0.73102315709768  |
| N | -2.71362048607024 | -1.19890707061280 | 1.01496834007789  |
| H | -1.52196892514980 | -1.94721226757076 | -0.56482341375584 |
| C | -2.14869371685575 | 0.08315362754369  | -1.05382765098989 |
| C | 1.38895540063130  | 0.62066794197528  | -0.54766553059165 |
| C | 0.45095021631772  | 2.27907560395390  | 1.29942297896181  |
| C | -3.28221639069848 | -0.61502081801494 | 3.36407064180928  |
| C | -4.07882074183083 | -1.55663110039891 | 0.68440752401011  |
| H | -1.32409394284065 | 0.25163639075735  | -1.75706505011395 |
| H | -3.04235670784893 | -0.21426427925682 | -1.62297197781122 |
| H | -2.36610787320908 | 1.02917823889749  | -0.53693206238793 |
| N | 0.91316558781694  | -0.55235726185100 | -1.01578491961258 |
| N | 2.40003207530431  | 1.33778951059685  | -1.16109703094329 |
| H | -0.07166714569409 | 2.09048350365482  | 2.24901942640956  |
| H | -0.23614788228605 | 2.90436097660077  | 0.69043578135810  |
| C | 1.71399155796725  | 3.10477911692384  | 1.55745090101707  |
| H | -2.77844003605565 | -0.17680060790010 | 4.23069592456048  |
| H | -4.16635505895100 | -0.00829889624286 | 3.11662852646629  |
| H | -3.63654961668346 | -1.62252971837655 | 3.63008291209522  |
| H | -4.07481355510463 | -2.36522279604737 | -0.06096776270769 |
| H | -4.60180162981500 | -1.92421905942437 | 1.57510855674103  |
| H | -4.65766598048147 | -0.71318253388483 | 0.26590761306963  |
| C | 1.71329151995241  | -1.33092871948333 | -1.93588933995629 |
| C | 3.21192695415716  | 2.27838922862275  | -0.38559208848893 |
| C | 3.17009700859740  | 0.66835500006079  | -2.21834370395332 |
| H | 2.38020371833622  | 2.55242516308658  | 2.24275584284828  |
| H | 1.43399539334833  | 4.04197993485066  | 2.06700661366095  |
| C | 2.48035381405295  | 3.44860327016240  | 0.27808295955114  |
| C | 2.35487238089918  | -0.38763253211408 | -2.95528418299282 |
| H | 1.06569689998217  | -2.06431967527237 | -2.44276822345891 |
| H | 2.51008996603349  | -1.91851792067936 | -1.42488124258899 |
| H | 3.94243971876946  | 2.69213461886482  | -1.09779688422910 |
| H | 3.79393332482718  | 1.73177526427338  | 0.38594771770273  |
| H | 4.07028276420277  | 0.18970718525782  | -1.77859937722270 |
| H | 3.53074376246788  | 1.44107670353680  | -2.91690743142301 |
| H | 1.80173062794627  | 3.91365244447137  | -0.45800019193601 |
| H | 3.25017460905745  | 4.20212674975967  | 0.51374699284540  |
| H | 3.01341039424712  | -0.92833929051679 | -3.65270445636681 |
| H | 1.56036640350226  | 0.09495535158939  | -3.54587099191106 |
| C | -2.12342512532316 | -3.67035936834531 | -2.59320934251234 |
| S | -0.82543017565713 | -4.36218624898959 | -2.06994652249506 |
| S | -3.41808140285265 | -2.96828353287247 | -3.11314109138382 |

TS Fig.6 (Ch=0)

|   |                   |                   |                   |
|---|-------------------|-------------------|-------------------|
| P | -0.44941735455773 | -0.71678792622076 | 0.84689428109761  |
| N | -0.93853723773119 | -0.23248425751349 | 2.40267967938329  |
| C | 0.38051412064620  | -2.32082471724074 | 1.00377660722597  |
| C | -2.21805620127708 | -1.14376891515556 | 0.29766703514442  |
| C | 0.44469214396180  | 0.47882071988545  | 0.04654616008636  |
| C | -2.19862749374388 | -0.53307448316795 | 2.59201117774047  |
| H | 1.41241381272820  | -2.16234809194670 | 1.33819658768559  |
| H | -0.16411920886381 | -2.90885393790769 | 1.75552453928651  |
| H | 0.38029869906086  | -2.82881002898141 | 0.03474240116606  |
| N | -2.93143300470808 | -1.10215594683173 | 1.58142623682666  |
| H | -2.23330169100243 | -2.16533493369379 | -0.10988070055744 |
| C | -2.77423967576338 | -0.14963909635068 | -0.72155212577873 |
| C | 1.44932669600909  | 0.06519037171105  | -0.90349515225911 |
| C | -0.00334474663422 | 1.92517437592621  | 0.18459364941146  |
| C | -2.84783973968451 | -0.27148290321919 | 3.92020820626927  |
| C | -4.36249407628759 | -1.34852681750788 | 1.62161284890767  |
| H | -2.08294831668354 | -0.04763712042342 | -1.56773588025956 |

|   |                   |                   |                   |
|---|-------------------|-------------------|-------------------|
| H | -3.75093878835467 | -0.46799906656470 | -1.11393457831101 |
| H | -2.88626170427269 | 0.84755576468871  | -0.27299528767650 |
| N | 1.32061580530891  | -1.04781450559233 | -1.60131507042808 |
| N | 2.55576816936663  | 0.89899595961280  | -1.03209758814214 |
| H | -0.98410729730898 | 1.94939594954776  | 0.68617411233752  |
| H | -0.16926952771285 | 2.35947303266432  | -0.81937694191761 |
| C | 0.93571664469662  | 2.84840765651438  | 0.97686383977782  |
| H | -2.10615125697018 | 0.18133979971167  | 4.58429013201011  |
| H | -3.70661271991336 | 0.40842722257553  | 3.82009940163721  |
| H | -3.21271909833962 | -1.20387833781673 | 4.37645258674274  |
| H | -4.69239151534164 | -1.50733904387894 | 2.65427182664866  |
| H | -4.94533945786355 | -0.51564965464066 | 1.19244123609431  |
| H | -4.59179223045271 | -2.25860547878431 | 1.04858300030724  |
| C | 2.48388893214239  | -1.43315249054942 | -2.38939088687224 |
| C | 3.03276946995054  | 1.70504587279965  | 0.08880432283605  |
| C | 3.44505853418838  | 0.82750289899928  | -2.19274114615043 |
| H | 1.07190103608988  | 2.42095105789526  | 1.98445927727971  |
| H | 0.45406818585102  | 3.83274937389155  | 1.10578821775123  |
| C | 2.30071155791015  | 3.03295166982773  | 0.31661628273493  |
| C | 2.98156871840906  | -0.22701199396952 | -3.19095768577117 |
| H | 2.20482059891078  | -2.26396258062447 | -3.05513909737249 |
| H | 3.30720960589871  | -1.80852567234886 | -1.74497352319048 |
| H | 4.09895538927306  | 1.90477426237699  | -0.10221031675262 |
| H | 2.97330514358237  | 1.10222656338719  | 1.01153951852484  |
| H | 4.46416834821880  | 0.57780681476575  | -1.84097402411770 |
| H | 3.51024373175931  | 1.82185809726908  | -2.67234165581779 |
| H | 2.19351081315875  | 3.55457068048654  | -0.65018041237198 |
| H | 2.93334263264079  | 3.67397135794141  | 0.95350534234349  |
| H | 3.81024756048702  | -0.48023267678426 | -3.87040434944741 |
| H | 2.14756863680731  | 0.14932837644136  | -3.80193139773680 |
| O | -0.57817494162284 | -0.90498060967350 | -3.66272510864986 |
| C | -0.60102092137159 | -1.77281285975948 | -2.86522241402471 |
| O | -0.86354678059463 | -2.74282373177162 | -2.24429316365130 |

TS Fig.6 (Ch=S)

|   |                    |                   |                   |
|---|--------------------|-------------------|-------------------|
| P | -0.48252854412797  | -0.62348275196573 | 0.81394958087885  |
| N | -1.01960212034699  | -0.08879209625829 | 2.33994153109617  |
| C | 0.37487342318085   | -2.19895317640729 | 1.11014317981665  |
| C | -2.21400603884938  | -1.14260699977318 | 0.26544071690014  |
| C | 0.42487445143454   | 0.58977095839203  | 0.02617394518215  |
| C | -2.21845184020417  | -0.56472421476982 | 2.56498797017861  |
| H | 1.40808785762836   | -1.99377589024176 | 1.41320489148199  |
| H | -0.15160088283647  | -2.71109062755610 | 1.92814427525628  |
| H | 0.37437718947395   | -2.80919682808825 | 0.20286827770002  |
| N | -2.87219438370167  | -1.26364300312004 | 1.57997190646088  |
| H | -2.165123350303263 | -2.12376552784945 | -0.22968197075783 |
| C | -2.90926669188626  | -0.11487038708536 | -0.62461216575817 |
| C | 1.43146588494812   | 0.11738906271020  | -0.87540192144330 |
| C | -0.02401430109905  | 2.03239723483337  | 0.15334653285045  |
| C | -2.87987330272398  | -0.37367116780936 | 3.89790744013280  |
| C | -4.25864870110951  | -1.69596261172771 | 1.65671474817402  |
| H | -2.34531153404483  | 0.03294057031712  | -1.55226561983091 |
| H | -3.92344059671525  | -0.44429812187012 | -0.89320457254556 |
| H | -2.98261686982340  | 0.85702200479609  | -0.11560377332815 |
| N | 1.25196595372420   | -1.05917417471864 | -1.46340071829632 |
| N | 2.54990771113709   | 0.90333819859805  | -1.09631450790795 |
| H | -0.96848413671818  | 2.05855821420480  | 0.71855039211919  |
| H | -0.25731533896354  | 2.43273149866140  | -0.85044338406402 |
| C | 0.96115545358543   | 2.98257415744076  | 0.84764789219742  |
| H | -2.21169747786326  | 0.20947318448105  | 4.53806083718694  |
| H | -3.84027283822727  | 0.15318980290409  | 3.79839435562489  |
| H | -3.08186637100872  | -1.34104818040092 | 4.38197508918983  |
| H | -4.49655449619401  | -2.02693004896473 | 2.67451260734467  |
| H | -4.97049584330604  | -0.90314991115239 | 1.36942392226061  |
| H | -4.40337665573451  | -2.54933295828981 | 0.98069748209258  |
| C | 2.37295486316050   | -1.63111746813849 | -2.18659598602528 |
| C | 3.04109692659801   | 1.81222345730131  | -0.05948855664588 |
| C | 3.53949942244716   | 0.54744847374062  | -2.11937000053072 |
| H | 1.16276873250084   | 2.60404528228834  | 1.86389239630768  |
| H | 0.48807653452040   | 3.97251936203887  | 0.95948244792386  |
| C | 2.27944837338849   | 3.13353104757858  | 0.09264799882934  |
| C | 3.05157922194864   | -0.55988618650125 | -3.04270403761684 |
| H | 1.99155646592658   | -2.45823195145912 | -2.80613334302140 |
| H | 3.11044885507053   | -2.07648713032849 | -1.48672054024220 |
| H | 4.08961700100751   | 2.02977794285558  | -0.31047982540587 |
| H | 3.03960649640991   | 1.28431210048012  | 0.91220979282409  |
| H | 4.46738167997683   | 0.21919954278927  | -1.61191900559800 |
| H | 3.79492058091297   | 1.45395621572926  | -2.69491168913024 |

|   |                   |                   |                   |
|---|-------------------|-------------------|-------------------|
| H | 2.10184239067924  | 3.55973972001888  | -0.90925434235087 |
| H | 2.93137374088217  | 3.84099188466882  | 0.63143294272638  |
| H | 3.90513517005968  | -0.95864690327926 | -3.61218473915920 |
| H | 2.32175172042516  | -0.16693018893861 | -3.76497809339456 |
| C | -0.45201572889974 | -0.99515370477627 | -3.00354179869806 |
| S | -0.89442040736257 | -2.52446297197756 | -3.05755361299302 |
| S | -0.52066861624774 | 0.54131119661940  | -3.41470516799208 |

INT Fig.6 (Ch=O)

|   |             |             |             |
|---|-------------|-------------|-------------|
| P | 2.32984264  | 7.83807868  | 3.38809588  |
| N | 2.21228690  | 8.57446844  | 4.97224678  |
| C | 3.14692801  | 6.29614485  | 3.93162416  |
| C | 0.45345490  | 7.81074290  | 3.20382862  |
| C | 3.34805398  | 9.05069991  | 2.60335838  |
| C | 0.97979480  | 8.62595002  | 5.36980883  |
| H | 3.53630770  | 6.44504933  | 4.94452535  |
| H | 2.41026790  | 5.48220380  | 3.92384512  |
| H | 3.95449044  | 6.03084259  | 3.23927323  |
| N | -0.02247231 | 8.17663086  | 4.53446047  |
| H | 0.16468021  | 6.77548126  | 2.96598908  |
| C | -0.04929579 | 8.75346869  | 2.10724301  |
| C | 4.29948479  | 8.66564743  | 1.67839099  |
| C | 3.11878224  | 10.50880196 | 2.95431214  |
| C | 0.61329189  | 9.14959117  | 6.73010360  |
| C | -1.44473214 | 8.25681111  | 4.79439148  |
| H | 0.37255284  | 8.45170545  | 1.14310857  |
| H | -1.14611353 | 8.71237281  | 2.03081275  |
| H | 0.24207951  | 9.79321645  | 2.31277068  |
| N | 4.29483367  | 7.45753378  | 0.98070054  |
| N | 5.38862326  | 9.48879841  | 1.43417198  |
| H | 2.15036673  | 10.58606499 | 3.46693130  |
| H | 3.01717207  | 11.07755730 | 2.01152942  |
| C | 4.16842277  | 11.20756975 | 3.83075680  |
| H | 1.53017729  | 9.46647262  | 7.23544312  |
| H | -0.07586551 | 10.00439576 | 6.66145788  |
| H | 0.12200732  | 8.37591517  | 7.33955582  |
| H | -1.63302302 | 8.25431786  | 5.87385935  |
| H | -1.91148962 | 9.16074774  | 4.36397534  |
| H | -1.94854976 | 7.37791195  | 4.36391305  |
| C | 5.41596989  | 7.20731403  | 0.07193440  |
| C | 6.07440236  | 10.11575829 | 2.56587965  |
| C | 6.04260571  | 9.58450743  | 0.12626058  |
| H | 4.33464076  | 10.59674589 | 4.73246251  |
| H | 3.76824650  | 12.17817070 | 4.16647747  |
| C | 5.48301830  | 11.42742175 | 3.08936508  |
| C | 5.61756778  | 8.44379802  | -0.79520601 |
| H | 5.14113975  | 6.32557181  | -0.51475612 |
| H | 6.32556570  | 6.98822634  | 0.65661527  |
| H | 7.11429696  | 10.28328212 | 2.24415793  |
| H | 6.09724809  | 9.38579667  | 3.39348651  |
| H | 7.13213856  | 9.52501870  | 0.29432358  |
| H | 5.84384656  | 10.56821682 | -0.33690734 |
| H | 5.33508947  | 12.12231795 | 2.24472219  |
| H | 6.22406744  | 11.89403309 | 3.75912398  |
| H | 6.38262019  | 8.28427184  | -1.56888167 |
| H | 4.67082658  | 8.66781711  | -1.30923497 |
| O | 2.14130261  | 6.90721554  | 1.60609435  |
| C | 3.09372947  | 6.69414920  | 0.75298930  |
| O | 3.05118030  | 5.90553023  | -0.18885752 |

INT Fig.6 (Ch=S)

|   |                   |                   |                  |
|---|-------------------|-------------------|------------------|
| P | 2.16628038991809  | 7.85933832198408  | 3.24491915725072 |
| N | 2.25688368754827  | 8.41211567325027  | 4.90289263061032 |
| N | -0.03279717151812 | 8.18734187052226  | 4.66412295370802 |
| N | 4.30966989956606  | 7.51162322404200  | 0.93881627483424 |
| N | 5.12537966868119  | 9.68441891175797  | 1.17898302333783 |
| C | 2.87205019554885  | 6.19806953254090  | 3.53482297298552 |
| C | 1.07542178745678  | 8.47657185956057  | 5.43417720945885 |
| C | 0.88329172658287  | 8.83716900772281  | 6.87971909880913 |
| C | -1.41445457871004 | 8.34296468756815  | 5.07469555506690 |
| C | 0.28036898279814  | 8.00203797496066  | 3.24824711533765 |
| H | -0.10973613392390 | 7.03119717226266  | 2.90146252375492 |
| C | -0.25740145685116 | 9.13362243300890  | 2.36846072334508 |
| C | 4.15550965216400  | 8.76113984798788  | 1.57195740236201 |
| C | 3.19694757078329  | 9.09617149448600  | 2.48793136593050 |
| C | 2.98246420792515  | 10.53194069935425 | 2.91602208787354 |
| H | 2.06356071336013  | 10.59014565255010 | 3.51374618603074 |

|   |                   |                   |                   |
|---|-------------------|-------------------|-------------------|
| H | 2.81300405368488  | 11.14006745683831 | 2.00918657106266  |
| C | 4.11748597385368  | 11.16921312761358 | 3.73667416561620  |
| H | 4.38822534060041  | 10.48176515244967 | 4.55400454903804  |
| H | 3.73752819385098  | 12.09073365901078 | 4.20668852807824  |
| C | 5.34480622970704  | 11.51580418345390 | 2.89608936174652  |
| H | 5.07254529678526  | 12.26016922355866 | 2.12844384568949  |
| H | 6.11392777099589  | 11.98019516942772 | 3.53502156428736  |
| C | 5.97431181893458  | 10.30640196001900 | 2.20195809587440  |
| H | 6.90375845536523  | 10.61604943901996 | 1.70248662960565  |
| H | 6.24906620322483  | 9.55501760999765  | 2.96576085172365  |
| C | 5.68835923458999  | 9.45575355541981  | -0.15642508967636 |
| H | 6.34060596567864  | 10.30321846933075 | -0.40401281098133 |
| H | 4.85433282760368  | 9.46788183402246  | -0.87301072649965 |
| C | 6.41821337342043  | 8.10329290446400  | -0.25386108159425 |
| H | 7.48211810358125  | 8.19501512105756  | 0.01219804788489  |
| H | 6.35698130280665  | 7.71917426490471  | -1.28203436519093 |
| C | 5.72522818066630  | 7.14687365819027  | 0.72351135906218  |
| H | 5.73873847678380  | 6.11407986118394  | 0.35975162388888  |
| H | 6.20843675683321  | 7.19353317572222  | 1.71204921728862  |
| C | 3.29107135911850  | 6.79656067106322  | 0.28557586667541  |
| H | 0.15832361503303  | 9.05359158078847  | 1.35626316739492  |
| H | -1.35281806500851 | 9.07909532014575  | 2.29162375251021  |
| H | 0.01165642784727  | 10.11475948141799 | 2.78283762896930  |
| H | -1.50324033460307 | 8.20713438791154  | 6.15818780362430  |
| H | -1.83013206851871 | 9.33119290876034  | 4.81073548841336  |
| H | -2.03150146377040 | 7.57279099775402  | 4.58818660173559  |
| H | 1.86541543763355  | 9.03424511511890  | 7.31904907205226  |
| H | 0.25033535808005  | 9.72966315110692  | 6.99329228973658  |
| H | 0.40392570311952  | 8.01726698303284  | 7.43566089072809  |
| H | 3.41673651655306  | 6.22517780541422  | 4.48654025376535  |
| H | 2.03703384195922  | 5.48807687407014  | 3.60054747365919  |
| H | 3.52221416909094  | 5.88764287100611  | 2.71245781943173  |
| S | 3.65544697523077  | 5.75825960539311  | -0.97595276495358 |
| S | 1.68689184793819  | 7.03159000777104  | 0.85457541865682  |

12'

|   |                   |                  |                     |
|---|-------------------|------------------|---------------------|
| P | 9.89003973144595  | 6.73752356282169 | 19.74971269344028   |
| O | 10.67741482880614 | 7.81970303739321 | 20.40794207564287   |
| N | 9.09324513112549  | 7.09655986795324 | 18.30778151923514   |
| N | 10.63688530018954 | 5.51288234670121 | 17.59045077023139   |
| C | 8.65309792627064  | 5.98797323498552 | 20.84656262885917   |
| C | 9.63867466220471  | 6.42178795392565 | 17.32853738275853   |
| C | 9.18509564284533  | 6.64062889873705 | 15.91420597167686   |
| C | 11.28912551778143 | 4.65790379261434 | 16.61998623897053   |
| C | 10.93006143408124 | 5.35028055854975 | 19.02091060518697   |
| H | 10.53743250205910 | 4.37256847133448 | 19.35743360308715   |
| C | 12.40807591999178 | 5.47503383380493 | 19.3777817224334487 |
| H | 10.01003230760246 | 7.00349475934290 | 15.28347742789205   |
| H | 8.79804883076541  | 5.71494576060060 | 15.46362846699431   |
| H | 8.39143575958525  | 7.39298933333850 | 15.92486932241566   |
| H | 12.38231106864462 | 4.77951976538352 | 16.65990342950904   |
| H | 11.05521741989726 | 3.59543967187322 | 16.80828235858221   |
| H | 10.95779102044263 | 4.91064598219221 | 15.60828869460582   |
| H | 12.79505904785320 | 6.46129745881014 | 19.09077860880285   |
| H | 12.53273071470140 | 5.37945802270173 | 20.46454480404308   |
| H | 13.01437711395319 | 4.69133673584830 | 18.89971226139344   |
| H | 9.15205105022300  | 5.60340863245175 | 21.74675021106754   |
| H | 7.94671758519696  | 6.77322175795934 | 21.14718009475397   |
| H | 8.10371729433297  | 5.17976033067651 | 20.34661330750553   |

19'

|   |                   |                  |                   |
|---|-------------------|------------------|-------------------|
| P | 9.88339442001437  | 6.76536447715822 | 19.73963954744668 |
| N | 9.05552632978607  | 7.07915732121412 | 18.29546027402729 |
| N | 10.65561747367520 | 5.54945694377691 | 17.58434461773847 |
| C | 8.67151673149279  | 5.98403854010306 | 20.85097659613654 |
| C | 9.62292554375917  | 6.41771990426978 | 17.31977830869779 |
| C | 9.16027767096391  | 6.61936770238520 | 15.90674735120623 |
| C | 11.31854535086920 | 4.69872995709619 | 16.61693508081628 |
| C | 10.92421827082756 | 5.36293905306463 | 19.01741960928134 |
| H | 10.48285642238310 | 4.40046082807833 | 19.34131047529748 |
| C | 12.39732479065401 | 5.41363543847663 | 19.39373198976485 |
| H | 9.97192663241772  | 7.01300190145453 | 15.27700196425923 |
| H | 8.80721390475383  | 5.68056282568618 | 15.45555838165346 |
| H | 8.34043536777796  | 7.34315659248622 | 15.91788764827758 |
| H | 12.41045749880859 | 4.82259598516124 | 16.66973550189853 |
| H | 11.08419808807444 | 3.63447823812152 | 16.79619353643366 |
| H | 10.99766201060293 | 4.95814365590936 | 15.60356445218985 |
| H | 12.83593342809488 | 6.37977642355736 | 19.11141139270956 |

|   |                   |                  |                   |
|---|-------------------|------------------|-------------------|
| H | 12.50235739139110 | 5.31317773022798 | 20.48208701016746 |
| H | 12.96630091148755 | 4.59814734996002 | 18.92304494874691 |
| H | 9.19156364447899  | 5.61490225124325 | 21.74495299885231 |
| H | 7.95067059032368  | 6.75284186464134 | 21.15713610369252 |
| H | 8.14274274729051  | 5.16291098520595 | 20.34862209036167 |
| S | 10.87463990007227 | 8.22699096072190 | 20.55362322034410 |

18

|   |                  |                   |                   |
|---|------------------|-------------------|-------------------|
| O | 3.04392843600877 | -0.04113241825422 | 7.88208761360019  |
| O | 2.88830685645742 | -2.01127867919294 | 6.81733111790920  |
| O | 3.12131875537044 | 1.85961849546412  | 9.06164163055374  |
| N | 5.09049345379096 | 0.74947336110741  | 8.68075285478367  |
| N | 7.13581473813169 | -0.29161990261973 | 8.20468075112290  |
| C | 5.76793959358265 | -0.34255318745483 | 8.13737723182981  |
| C | 5.06498390236110 | -1.37280918502049 | 7.53389915779825  |
| C | 3.70748398370777 | 0.91134381794680  | 8.57891812689196  |
| C | 3.65039438025845 | -1.23231245411871 | 7.34960826355574  |
| C | 6.81457514456946 | -3.18827730757181 | 8.03120611243947  |
| H | 6.91988693276316 | -4.28083884350770 | 7.95819274618363  |
| H | 6.57277740466331 | -2.97434243863345 | 9.08463894179291  |
| C | 5.64058342131702 | -2.72654282435410 | 7.15620135116051  |
| H | 5.92386211957251 | -2.76453453649810 | 6.08889087825393  |
| H | 4.80913443434096 | -3.43893793903559 | 7.24850006044352  |
| C | 6.93305328638214 | 1.12114016877101  | 10.20898482874801 |
| H | 7.48976497062322 | 1.86310803968529  | 10.79694859591852 |
| H | 6.47272645021696 | 0.41364576567744  | 10.91544184537329 |
| C | 7.93145738155764 | -1.06299335202563 | 7.24950611039773  |
| H | 8.89170518582495 | -0.53757547408525 | 7.12835362331093  |
| H | 7.41623145432673 | -1.01420889556885 | 6.28008370661774  |
| C | 8.14776757421171 | -2.52070081529678 | 7.65541807343129  |
| H | 8.86252450649074 | -2.59070676727643 | 8.49067358624472  |
| H | 8.61406397956631 | -3.04162094682007 | 6.80342167991535  |
| C | 5.84052153602767 | 1.79118712722569  | 9.38974485131809  |
| H | 5.11447020338891 | 2.33402059426981  | 10.0032227994647  |
| H | 6.27306466925247 | 2.50254772019593  | 8.66503754000941  |
| C | 7.87714875660316 | 0.40087794968141  | 9.25854263897303  |
| H | 8.56150793376117 | 1.12637258222849  | 8.78261664764798  |
| H | 8.50470855487044 | -0.32714965491869 | 9.80247715382785  |

20

|   |                   |                   |                   |
|---|-------------------|-------------------|-------------------|
| N | 5.06201258110372  | 0.80776740720519  | 8.69026724430157  |
| N | 7.06885596202354  | -0.26354446700041 | 8.16195870176621  |
| C | 5.69224931052624  | -0.32641947643853 | 8.14050498203171  |
| C | 5.01844060999336  | -1.40745933844412 | 7.56258517126179  |
| C | 3.71452935276947  | 1.10645583107725  | 8.59077807958441  |
| C | 3.63858203547318  | -1.33745127505110 | 7.20287070556765  |
| C | 6.933332511256019 | -3.08179174520756 | 8.13262349069537  |
| H | 7.07176344159401  | -4.17261439446226 | 8.15637600040746  |
| H | 6.77787141584274  | -2.77311182514114 | 9.17938039117109  |
| C | 5.67942345321038  | -2.75633116774773 | 7.31495751929559  |
| H | 5.88030726211652  | -2.89443714184127 | 6.23735517076828  |
| H | 4.89673858909146  | -3.49934459168658 | 7.52950751224504  |
| C | 6.92186117228213  | 0.99900391274766  | 10.24942307277930 |
| H | 7.50824837356747  | 1.68464038584897  | 10.87535145147637 |
| H | 6.37620717728602  | 0.32046872131653  | 10.92244405158987 |
| C | 7.84671552122260  | -0.97946580907197 | 7.15206122070602  |
| H | 8.75504466647645  | -0.38530369270353 | 6.95997514685363  |
| H | 7.25734712298931  | -0.97776873200352 | 6.22593810953477  |
| C | 8.18919133593355  | -2.41141342590480 | 7.56577524878121  |
| H | 9.00897931433093  | -2.42583038768396 | 8.30071860442069  |
| H | 8.55348728328563  | -2.95400740810251 | 6.67923115596374  |
| C | 5.92579951892858  | 1.76790974218432  | 9.40033799684867  |
| H | 5.25436461977881  | 2.40309727167987  | 9.98939580200542  |
| H | 6.43859321473570  | 2.40777658808254  | 8.66250649474140  |
| C | 7.83303063685765  | 0.22731124176789  | 9.31036883785366  |
| H | 8.63391864651546  | 0.88216322909617  | 8.92581891752105  |
| H | 8.32225994680258  | -0.61925102455971 | 9.82564103180881  |
| S | 2.76662564361620  | -2.49275538878263 | 6.37533191298371  |
| S | 2.98488336919707  | 2.45411310401159  | 9.23916358694258  |
| S | 2.67971537988884  | 0.05810040681539  | 7.67025788809266  |

3a' + DBU

|   |                  |                   |                   |
|---|------------------|-------------------|-------------------|
| P | 7.11011242445452 | 10.99463621428011 | 17.88701875346143 |
| N | 6.50133800175101 | 10.14667472207569 | 20.58289819587640 |
| N | 6.27747145323736 | 8.58436769785288  | 19.06787196859870 |
| N | 8.0800996179797  | 10.18636590250642 | 16.85194909949333 |
| N | 9.43775026357841 | 11.95291062274991 | 17.50643591893093 |
| C | 6.63503575482191 | 9.88305886231621  | 19.25888301615113 |

|   |                   |                   |                    |
|---|-------------------|-------------------|--------------------|
| C | 6.81223609438377  | 11.40861763007211 | 21.26273424863955  |
| H | 6.36324082131488  | 12.24602501298531 | 20.71620734886573  |
| C | 6.08085043724849  | 9.00738706771462  | 21.22634446403072  |
| C | 5.93827722455568  | 8.03096110851742  | 20.27734046598311  |
| C | 6.18548203133619  | 7.88484580560724  | 17.77675040854928  |
| H | 7.08144728773893  | 8.09865591228071  | 17.18452118460297  |
| C | 5.57604640525671  | 11.54451623165723 | 17.18589038599959  |
| C | 5.45205315429465  | 11.54980022998254 | 15.78647571791581  |
| H | 6.25344296396885  | 11.14602438207638 | 15.16696384296058  |
| C | 4.29324007108689  | 12.06709617700588 | 15.21022769760646  |
| H | 4.18060316788505  | 12.06639689326053 | 14.12596591823320  |
| C | 3.27923789042659  | 12.58543991990160 | 16.02150089740730  |
| H | 2.37728987067641  | 12.99439149907944 | 15.56507538761527  |
| C | 3.40758643705923  | 12.57896521158403 | 17.41546393785690  |
| H | 2.61078218031718  | 12.98223851998977 | 18.04025309131853  |
| C | 4.55349114932749  | 12.05303845766864 | 18.00494306603024  |
| H | 4.64707223699207  | 12.04938506067558 | 19.09221152239567  |
| C | 8.31995243683480  | 12.30117894583931 | 18.42241250279340  |
| H | 8.70081863426589  | 12.08070642834478 | 19.45302164178457  |
| C | 7.79588348066526  | 13.70201306761992 | 18.29112625897952  |
| C | 7.45277173120482  | 14.23435346670311 | 17.03899724519231  |
| H | 7.61473991929975  | 13.65072271998173 | 16.13059674480182  |
| C | 6.92168815762972  | 15.51932297750986 | 16.94650447067030  |
| H | 6.66579047042714  | 15.93211645187557 | 15.97047399315872  |
| C | 6.72272060864771  | 16.28038677624191 | 18.10309179160901  |
| H | 6.30723709828592  | 17.28556903902096 | 18.02854177406716  |
| C | 7.07469440070545  | 15.76103096301983 | 19.35065403709926  |
| H | 6.94316855672683  | 16.36253928198488 | 20.25043385412348  |
| C | 7.61464113685207  | 14.47662649671535 | 19.44400468083649  |
| H | 7.92257544238353  | 14.08248127521908 | 20.41380884417348  |
| C | 10.59518907981984 | 12.84693695346369 | 17.50973209479072  |
| C | 9.28013199432280  | 10.81332056476494 | 16.80278371478706  |
| C | 10.34301369125605 | 10.22208035645122 | 15.98238839303354  |
| C | 9.98494690765101  | 9.59899364616251  | 14.77275970628438  |
| H | 8.94108698195289  | 9.59841466771097  | 14.462109995879527 |
| C | 10.96087468874983 | 9.00480846636603  | 13.97847009248953  |
| H | 10.68237833285577 | 8.54423424756346  | 13.03058736079575  |
| C | 12.29528526789682 | 8.99417245091501  | 14.39773773214786  |
| H | 13.05750760094027 | 8.52271313557901  | 13.77675796798765  |
| C | 12.65272994503272 | 9.58050892518810  | 15.61542695827604  |
| H | 13.68968934760070 | 9.55486922328385  | 15.95064652775887  |
| C | 11.68603833579443 | 10.20091812103228 | 16.40314583557581  |
| H | 11.97351793469790 | 10.63756095618428 | 17.358447076243733 |
| H | 11.17529271464055 | 12.69871325194874 | 16.59474722422177  |
| H | 10.23384953845913 | 13.88195750188263 | 17.54227404695946  |
| H | 11.22336221924494 | 12.66127708193710 | 18.39219294545645  |
| H | 6.10242102670234  | 6.81272643983693  | 17.97683416121403  |
| H | 5.29293483491908  | 8.22890411277043  | 17.23840774032319  |
| H | 5.62110289664484  | 6.99852954807111  | 20.36790004061384  |
| H | 5.91507639227568  | 8.98199478072024  | 22.29687267275047  |
| H | 6.38133651761843  | 11.36717231327480 | 22.26738768354176  |
| H | 7.91587952728704  | 11.51448385029097 | 21.30707999819177  |
| C | 10.19648042622497 | 9.35568004685369  | 19.95254802811017  |
| C | 10.72508979649403 | 10.51137165293199 | 20.77122158065579  |
| C | 9.88636485183907  | 8.09132476100873  | 20.77935257639723  |
| N | 9.95235389962006  | 11.56448429699297 | 20.89378067370992  |
| N | 11.95049596725651 | 10.36095838475050 | 21.33932001982419  |
| H | 9.15247112786931  | 7.48608188174650  | 20.22368860416276  |
| H | 9.39908006140795  | 8.39014214791406  | 21.72317436237387  |
| C | 11.10922343857794 | 7.21251371755555  | 21.06823190418039  |
| C | 10.45351067783005 | 12.67910341401876 | 21.70043719334050  |
| C | 12.77960444808395 | 9.16233147717066  | 21.13767347951296  |
| C | 12.45910780388931 | 11.34556790347835 | 22.31024188154323  |
| H | 11.50601428581707 | 6.84318218992825  | 20.10643003507522  |
| H | 10.78800715556906 | 6.32043327027820  | 21.62644467293659  |
| C | 12.24383104162140 | 7.90324489885145  | 21.83097105948524  |
| C | 11.32720045781737 | 12.20205962767829 | 22.85801158652603  |
| H | 9.59174419396072  | 13.25137054047597 | 22.080985444892616 |
| H | 11.02275792346531 | 13.37883666909489 | 21.06045927880492  |
| H | 13.77437852936350 | 9.41238754106488  | 21.52821373159281  |
| H | 12.91269673557833 | 8.97817917318250  | 20.05907785335840  |
| H | 13.22980052770046 | 11.96989497365123 | 21.82705078355755  |
| H | 12.95187619472629 | 10.79350755294126 | 23.12397502833932  |
| H | 11.92520021236864 | 8.16772239973261  | 22.85286161278783  |
| H | 13.07573612336564 | 7.19136052837697  | 21.94208139546854  |
| H | 11.74059337823535 | 13.04894721098527 | 23.42201252732837  |
| H | 10.71510239510094 | 11.61014938964973 | 23.55624273172902  |
| H | 9.28189101134359  | 9.71643268708551  | 19.46803513158940  |

|     |                   |                   |                   |
|-----|-------------------|-------------------|-------------------|
| H   | 10.89889505128465 | 9.10066825585010  | 19.14166029249362 |
| TS1 |                   |                   |                   |
| P   | -1.68769443826983 | 0.06958105176417  | -1.00716911039828 |
| N   | -0.72636672807629 | -0.77921587767010 | -2.02793667725049 |
| C   | -2.24366062828821 | -1.07892253039603 | 0.32074533695682  |
| C   | -3.23438850774667 | 0.59956470825088  | -1.71750533145894 |
| C   | -0.50117209178290 | 1.33209935839665  | -0.49121547748502 |
| C   | 0.44152569636999  | -0.10238179346684 | -2.16271073066799 |
| N   | -2.66878875517362 | -2.34344591827252 | 0.06325590622752  |
| N   | -2.38066459961477 | -0.87849053422769 | 1.65514870003834  |
| C   | -3.32578364867726 | 0.66886666640455  | -3.11721428917968 |
| C   | -4.28248438047328 | 1.06454677292976  | -0.90622437208058 |
| N   | 0.57128465022040  | 1.05397901665637  | -1.48361764156850 |
| C   | -1.07023497383380 | 2.72356257055893  | -0.53508425640222 |
| C   | 1.49458028804346  | -0.67172977420357 | -3.01255585748233 |
| C   | -3.05966889825028 | -2.93912107583056 | 1.23906545504191  |
| C   | -2.79443117383803 | -2.96737716940996 | -1.26370605789980 |
| C   | -2.07929719170710 | 0.35271961111794  | 2.39102086159041  |
| C   | -2.87933790537486 | -2.02228285526319 | 2.23725093568306  |
| H   | -2.50483139253656 | 0.30162354092028  | -3.73423983640898 |
| C   | -4.47520755697490 | 1.19959962591751  | -3.70045004196384 |
| C   | -5.42001672154618 | 1.60597761328889  | -1.49947427719419 |
| H   | -4.21557518610888 | 1.01509933232042  | 0.18218834585327  |
| C   | 1.67444648469490  | 2.00626575117117  | -1.58204543901022 |
| C   | -1.35554732616245 | 3.34783005006506  | -1.76266072212734 |
| C   | -1.39341681185501 | 3.40022321461844  | 0.64888763403892  |
| C   | 1.11631041349908  | -1.33778685778058 | -4.19207262027879 |
| C   | 2.85318151091869  | -0.62787138866158 | -2.64982880690597 |
| H   | -3.43486117848989 | -3.95536378445705 | 1.27193004081355  |
| H   | -1.90551495265377 | -2.73219764426506 | -1.85904518353142 |
| H   | -2.89090768387839 | -4.04801712480326 | -1.12363497136549 |
| H   | -3.69105979039134 | -2.57731052551765 | -1.76250200781239 |
| H   | -2.60432085426801 | 1.20009332823294  | 1.93568858172541  |
| H   | -2.43052662575484 | 0.22671298191319  | 3.41956290648098  |
| H   | -0.99564398926629 | 0.53217428049291  | 2.38152555076864  |
| H   | -3.06856089407317 | -2.08950986598089 | 3.30202159811283  |
| H   | -4.56044829322231 | 1.24563108221777  | -4.78631216312288 |
| C   | -5.14975876702225 | 1.67239253697525  | -2.89403043722333 |
| H   | -6.23561360682085 | 1.97492149657391  | -0.87757805653725 |
| H   | 2.19486186324154  | 1.86613356779089  | -2.53384826022726 |
| H   | 1.26494971258006  | 3.02269657526621  | -1.54230282221614 |
| H   | 2.38493144348496  | 1.88095222742008  | -0.75217224928726 |
| H   | -1.10848475243592 | 2.84152082664321  | -2.69809836446851 |
| C   | -1.94681665336102 | 4.60886764748501  | -1.80141845297649 |
| C   | -2.00087557117334 | 4.65791300854416  | 0.61316803609417  |
| H   | -1.15551330762791 | 2.94967680403871  | 1.61241057341068  |
| H   | 0.06128154526894  | -1.39005712318490 | -4.45889208140566 |
| C   | 2.08324811492219  | -1.91242358695372 | -5.01205281415731 |
| C   | 3.81411330333228  | -1.22362602638154 | -3.46431333032293 |
| H   | 3.16083924339415  | -0.15244670330883 | -1.71896326375120 |
| H   | -6.40931968097045 | 2.09287992213016  | -3.35482415789819 |
| H   | -2.15285495428891 | 5.08153681366417  | -2.76223816348616 |
| C   | -2.27951501234866 | 5.26473406975707  | -0.61222859998596 |
| H   | -2.24194406145684 | 5.17158832977220  | 1.54443991827519  |
| H   | 1.78534822189225  | -2.40895850695485 | -5.93566391857693 |
| C   | 3.43323063358291  | -1.85629738128723 | -4.65095940289247 |
| H   | 4.86452450743261  | -1.19436773129082 | -3.17383235052554 |
| H   | -2.74495966305550 | 6.25004058750701  | -0.64234615942846 |
| H   | 4.18874340412427  | -2.31082824090932 | -5.29233563410727 |
| H   | 0.23340873404661  | 1.05167662030521  | 0.69909918695976  |
| N   | 1.14355061622423  | 0.88494351393626  | 1.64660096012590  |
| C   | 1.85600383094148  | -0.22829340350214 | 1.69366720617761  |
| C   | 1.62445823320137  | 2.08047347345572  | 2.34297011643796  |
| C   | 1.32226199230779  | -1.42858924863441 | 0.95668067556196  |
| N   | 2.99871956971029  | -0.36111338857278 | 2.38971280658330  |
| C   | 2.37926942121469  | 1.69513560880751  | 3.60981003879143  |
| H   | 0.76135715776290  | 2.71814556426047  | 2.57743327214404  |
| H   | 2.27369989980109  | 2.67003539511637  | 1.67249390788913  |
| C   | 0.85408132579584  | -2.56315069814069 | 1.89212930102995  |
| H   | 0.48676798228586  | -1.08880983926666 | 0.33589708886528  |
| H   | 2.08246836590844  | -1.81271304273804 | 0.25801964963561  |
| C   | 3.77070457151914  | -1.61990211257106 | 2.40657800838762  |
| C   | 3.49579866491648  | 0.72244662376515  | 3.25969413755678  |
| H   | 2.80083378029489  | 2.58293618192251  | 4.09881309791248  |
| H   | 1.68567303524141  | 1.22518262646888  | 4.32389281103699  |
| H   | 0.13198465250238  | -3.18345182730419 | 1.33919847807591  |
| H   | 0.30626468317913  | -2.12602290917197 | 2.74444053602492  |

|   |                  |                   |                  |
|---|------------------|-------------------|------------------|
| C | 1.98475774659028 | -3.46740124894002 | 2.39600964205144 |
| C | 3.09018670622003 | -2.75378514010448 | 3.18125735743287 |
| H | 4.73644500292472 | -1.37211331035631 | 2.86382134329942 |
| H | 3.98799333766693 | -1.92973049019945 | 1.37255142940756 |
| H | 4.32932335969975 | 1.23611361813793  | 2.75303933660124 |
| H | 3.90233235825031 | 0.25822153507179  | 4.16912744706165 |
| H | 2.43890801902480 | -3.97256535539618 | 1.52630567687632 |
| H | 1.55714796112854 | -4.26576446812150 | 3.02040254364761 |
| H | 2.70026419593769 | -2.35375507090538 | 4.13189227035605 |
| H | 3.86089773723071 | -3.49118321765172 | 3.45082955402707 |

INT1

|   |                   |                   |                   |
|---|-------------------|-------------------|-------------------|
| P | 7.52364002525615  | 11.45940824670508 | 17.84964519124455 |
| N | 6.95823421769504  | 11.82675839067015 | 20.70405794173798 |
| N | 6.78426083034724  | 9.76564374481037  | 20.00312623950684 |
| N | 8.97489817292785  | 10.76963074509273 | 17.42098034774759 |
| N | 9.40327417190324  | 13.01944911578740 | 17.26598363671330 |
| C | 6.93484424741051  | 11.05932399113472 | 19.57536291707641 |
| C | 7.12506640042278  | 13.27846358290651 | 20.78162811723269 |
| H | 6.33300508380696  | 13.78531010834972 | 20.21822561890437 |
| C | 6.78578288374149  | 11.02760226626185 | 21.81168164453578 |
| C | 6.68319848002550  | 9.73826409799542  | 21.37596159266433 |
| C | 6.71437073621716  | 8.56772983182757  | 19.16425300801940 |
| H | 7.49031283737310  | 8.60904535370469  | 18.39276313355839 |
| C | 6.21836110398995  | 10.68531343550499 | 16.87993976131963 |
| C | 6.53444107805259  | 10.20761013471628 | 15.59796854580250 |
| H | 7.56281889901409  | 10.26362493462660 | 15.23927955681884 |
| C | 5.52867081948987  | 9.68008867954268  | 14.78921627431098 |
| H | 5.77055736472428  | 9.30806188078254  | 13.79309844426565 |
| C | 4.20659218343081  | 9.64617642416114  | 15.24580203550467 |
| H | 3.42062636058598  | 9.24393215903761  | 14.60593685517605 |
| C | 3.88575823182200  | 10.14356253128767 | 16.51307679020518 |
| H | 2.85217472513751  | 10.13185660554879 | 16.86000135686943 |
| C | 4.88867510329907  | 10.66486163421804 | 17.32979753019166 |
| H | 4.63426297783781  | 11.06723456511059 | 18.31321670888195 |
| C | 8.06110000957367  | 13.09964631695703 | 17.71602802647361 |
| C | 7.26603653403940  | 14.30536701085775 | 17.84628884035009 |
| H | 5.87380559100269  | 14.23052430084637 | 17.61155903472838 |
| C | 5.44738859920679  | 13.31716254418417 | 17.19496051242083 |
| C | 5.04106037379855  | 15.32522613045619 | 17.84447226291644 |
| H | 3.97180302215989  | 15.23985748723673 | 17.64741414263055 |
| C | 5.57636123650161  | 16.53424997084225 | 18.29203082269619 |
| H | 4.93030129512575  | 17.39590737204739 | 18.45867361521868 |
| C | 6.95446552971723  | 16.63140249877356 | 18.51616108460061 |
| H | 7.38295928463796  | 17.56972730084275 | 18.87037048380746 |
| C | 7.78735449445655  | 15.53467446561456 | 18.31090050193838 |
| H | 8.84696171040981  | 15.62967012395370 | 18.54564382606383 |
| C | 10.11147524289044 | 14.18254200218118 | 16.71666169135544 |
| C | 9.87621802088935  | 11.75490709835516 | 17.17460017064724 |
| C | 11.26624983009460 | 11.43921382891827 | 16.81813549390520 |
| C | 11.52299011645478 | 10.50737219281812 | 15.79710896303295 |
| H | 10.68647450892037 | 10.08785583354325 | 15.23738378616588 |
| C | 12.83257948731624 | 10.15112408963419 | 15.48133700219644 |
| H | 13.02526173943864 | 9.44846832843963  | 14.66966940663921 |
| C | 13.90261177260789 | 10.72133493425758 | 16.17998427817830 |
| H | 14.92778797148155 | 10.45120077501572 | 15.92508085344253 |
| C | 13.65701628622672 | 11.65486148309235 | 17.19133195057304 |
| H | 14.48906836654429 | 12.10442253564920 | 17.73387503656064 |
| C | 12.34713431941364 | 12.01320756148267 | 17.51018713632653 |
| H | 12.16018826142111 | 12.72686981325125 | 18.31377896719080 |
| H | 10.88238472196484 | 13.83269528456284 | 16.02406023945678 |
| H | 9.39126298558412  | 14.81021670521491 | 16.17944603896296 |
| H | 10.58201028096009 | 14.77779663483681 | 17.50888340393461 |
| H | 6.88549963375406  | 7.69682422609960  | 19.80479982605672 |
| H | 5.73203990548628  | 8.49039848853645  | 18.68292813548372 |
| H | 6.54740798302153  | 8.81516361196838  | 21.92690605870757 |
| H | 6.74745799659237  | 11.43894589593808 | 22.81340903557817 |
| H | 7.07846790253778  | 13.56733712632013 | 21.83558509611106 |
| H | 8.09481517100980  | 13.55534729194152 | 20.35431569013181 |
| C | 9.23515917323680  | 7.37440219051636  | 16.01987234601417 |
| C | 10.40350652354945 | 7.38330113110087  | 16.96273399209624 |
| C | 8.26949223387896  | 6.19026651542815  | 16.24775501516454 |
| N | 10.46143791617942 | 8.37204471145495  | 17.84918709799342 |
| N | 11.31774225863336 | 6.41648121753474  | 16.92113563716680 |
| H | 7.30001757100394  | 6.46224947222649  | 15.80524451322946 |
| H | 8.09655252350991  | 6.06733666558424  | 17.33018339496736 |
| C | 8.74118362427976  | 4.86860820654399  | 15.63177969736020 |
| C | 11.56939422134334 | 8.53410603073870  | 18.78765102482167 |

|   |                   |                  |                   |
|---|-------------------|------------------|-------------------|
| C | 11.25374929361717 | 5.32146836319301 | 15.92725615956423 |
| C | 12.44513149444886 | 6.38448878140721 | 17.87677901115830 |
| H | 8.80619662354053  | 4.99481777281138 | 14.53741864394176 |
| H | 7.97272192450003  | 4.10083872107932 | 15.80267553224358 |
| C | 10.08850539754919 | 4.35221490427965 | 16.14616531530949 |
| C | 12.11984638900155 | 7.16047517503077 | 19.14708463049407 |
| H | 11.19186163383484 | 9.06255345459043 | 19.67276324780554 |
| H | 12.34578530590658 | 9.16763194874236 | 18.32833813274569 |
| H | 12.21134481611317 | 4.79358375006137 | 16.00764091467153 |
| H | 11.21980127074188 | 5.75524361261644 | 14.91546503268347 |
| H | 13.33911370457818 | 6.79072600517494 | 17.37679163159997 |
| H | 12.64745915545717 | 5.33086266604662 | 18.11088330337297 |
| H | 10.03032697645201 | 4.09642413574124 | 17.21709321058945 |
| H | 10.33132058297013 | 3.41687009117106 | 15.62025660257337 |
| H | 13.02687080870245 | 7.25887730918068 | 19.75673194068537 |
| H | 11.38068501208616 | 6.60527202577201 | 19.74376003213296 |
| H | 8.70697991176973  | 8.32857014228382 | 16.14803415338471 |
| H | 9.60546539480188  | 7.35526195444038 | 14.98170766900121 |
| H | 9.81152229855958  | 9.18366324079298 | 17.71471239445238 |

TS2

|   |                   |                   |                   |
|---|-------------------|-------------------|-------------------|
| P | -0.95119617140981 | 1.21213271490917  | -0.14224996152829 |
| N | 0.32448664718564  | 0.72249679082405  | -1.15364165394544 |
| C | -2.54300164657662 | 1.03352498494546  | -0.99916198628532 |
| C | -0.53327617280807 | 2.97029744242613  | -0.38846200983640 |
| C | 1.11607498746135  | 1.71983538709202  | -1.43511482340458 |
| C | -2.65647880499614 | 1.21433936613467  | -2.38575260275443 |
| C | -3.67566940532725 | 0.76621923242832  | -0.21679524719603 |
| N | 0.65217969299230  | 3.01600211799295  | -1.03268530225611 |
| C | -1.20938531668834 | 4.12966112488952  | 0.15670656329912  |
| C | 2.41258646683448  | 1.52584588527212  | -2.08943971458911 |
| H | -1.77257995543437 | 1.41705861736778  | -2.99151259483395 |
| C | -3.91234073205829 | 1.12738586800330  | -2.98632666939257 |
| C | -4.93000584226138 | 0.69407999241111  | -0.82558053920375 |
| H | -3.57789867094451 | 0.62052358195002  | 0.85995849221313  |
| C | 1.27715501635789  | 4.26300567896518  | -1.51235973684015 |
| C | -2.61437028219936 | 4.23275544645094  | 0.04274450514712  |
| C | -0.49979896309928 | 5.13996551052817  | 0.84672273360067  |
| C | 2.50532111277671  | 0.52820007995899  | -3.07851670070965 |
| C | 3.57275685745715  | 2.21577965443457  | -1.69129250625079 |
| H | -4.00823221562290 | 1.26458441206875  | -4.06387721633410 |
| C | -5.04768773118118 | 0.87549734553338  | -2.20710492083762 |
| H | -5.81598223231012 | 0.49764515195612  | -0.22111855390814 |
| H | 1.75472252349339  | 4.06088067206116  | -2.47600453485582 |
| H | 0.49402650616248  | 5.01883108556279  | -1.63074722984358 |
| H | 2.03037457576144  | 4.63372017023542  | -0.80815151587408 |
| H | -3.17027312052824 | 3.47180952185324  | -0.50120451430045 |
| C | -3.27908382959277 | 5.33184531554661  | 0.57497126400421  |
| C | -1.17810124566958 | 6.21846725814679  | 1.40191010333856  |
| H | 0.57644413125549  | 5.05133386686533  | 0.99265016165742  |
| H | 1.60494741847850  | -0.00651872452253 | -3.38037405355191 |
| C | 3.73032991284669  | 0.24801808886923  | -3.67573204477891 |
| C | 4.79840657975961  | 1.91924969483505  | -2.28297388393432 |
| H | 3.53305101244713  | 2.95899259474275  | -0.89531982620025 |
| H | -6.02840714883838 | 0.82009725891343  | -2.68063261051142 |
| H | -4.35899388225666 | 5.41978405794439  | 0.45597580331483  |
| C | -2.56641225341426 | 6.32312863135986  | 1.25820339509329  |
| H | -0.62587202114430 | 6.98052965067845  | 1.95189948480453  |
| H | 3.79166010319771  | -0.50904468269890 | -4.45768075225077 |
| C | 4.87841953846889  | 0.94271410315425  | -3.28044266683745 |
| H | 5.69516296629357  | 2.45089343153917  | -1.96442203187621 |
| H | -3.09336180945165 | 7.17802913905206  | 1.68293352034056  |
| H | 5.83714525987661  | 0.72443716554490  | -3.75167616516122 |
| H | 1.44234724527898  | -0.75631819062636 | -0.50548174467542 |
| N | 2.14305028779120  | -1.33724548575967 | -0.02996985248189 |
| C | 1.92403687499188  | -2.67584573472560 | -0.02398661996125 |
| C | 3.28917921485100  | -0.69587141995394 | 0.59701179507851  |
| C | 0.76289495536211  | -3.12335763894889 | -0.74306771816449 |
| N | 2.73804523996697  | -3.47057360081752 | 0.71710398335866  |
| C | 3.57315022071983  | -1.42671531080369 | 1.90392854043385  |
| H | 3.03614014380723  | 0.35799827134320  | 0.77116186896525  |
| H | 4.17136047201173  | -0.71683737178890 | -0.06629503164677 |
| C | 0.08278135638803  | -4.46249353501523 | -0.54491881360446 |
| H | 0.72641943271639  | -2.71029560784409 | -1.75838698644962 |
| C | 3.06916092997927  | -4.85379017301683 | 0.28673807754222  |
| C | 3.78108779552331  | -2.90116891345577 | 1.59905739342754  |
| H | 4.47075596706371  | -1.03069713850027 | 2.39722755069670  |
| H | 2.72735815740403  | -1.28649297661080 | 2.59374350982107  |

|   |                   |                   |                   |
|---|-------------------|-------------------|-------------------|
| H | -0.77700627004933 | -4.49119573022071 | -1.23194816791091 |
| H | -0.35055509599717 | -4.49851267919050 | 0.47298635850006  |
| C | 0.90297130798877  | -5.74155280440735 | -0.73546733822417 |
| C | 1.96502423066737  | -5.90250264360115 | 0.34496716779898  |
| H | 3.88653609209192  | -5.16919017733444 | 0.94740511124604  |
| H | 3.48321126066515  | -4.80579276875304 | -0.73532063631394 |
| H | 4.76129618554381  | -3.04197649628473 | 1.11182451128499  |
| H | 3.79395678320861  | -3.49556191454129 | 2.52500425231109  |
| H | 1.37639895035923  | -5.74575094220115 | -1.73149109183770 |
| H | 0.22241655952209  | -6.60615945668482 | -0.70722727536593 |
| H | 1.50016695154387  | -5.89728737240126 | 1.34523684377506  |
| H | 2.45840136590681  | -6.88075171343679 | 0.23697148232158  |
| H | -0.26985372287261 | -2.19744928801002 | -0.18452604011617 |
| C | -1.38083954990290 | -1.78333073692522 | 0.37966305547202  |
| N | -2.54794967033190 | -2.23723673400541 | -0.15503131475366 |
| N | -1.57021814915761 | -1.84453125883262 | 1.72747086381062  |
| C | -3.46449375287500 | -2.53484266426659 | 0.83576344221190  |
| C | -2.79540160819932 | -2.35517393913973 | -1.58740046005958 |
| C | -0.54919729021161 | -1.48989761663127 | 2.70563397646195  |
| C | -2.84630210645033 | -2.28890371140461 | 2.02816970520888  |
| H | -4.46202500284953 | -2.90004332761627 | 0.62103919918818  |
| H | -1.84823327430267 | -2.21404223043173 | -2.11666992658945 |
| H | -3.19853118425056 | -3.34922675681502 | -1.81545587164693 |
| H | -3.50848442545955 | -1.58804966617251 | -1.91449134188290 |
| H | -0.93666423522838 | -0.73732620604445 | 3.40413636075791  |
| H | -0.23451019982262 | -2.37844608451059 | 3.26797466534839  |
| H | 0.30835154468867  | -1.07746210752301 | 2.16375601994679  |
| H | -3.20397314337470 | -2.40366948231535 | 3.04495808998697  |

INT2 +HLc

|   |                   |                   |                   |
|---|-------------------|-------------------|-------------------|
| P | 7.06167811487565  | 11.67330334240261 | 17.42588363513124 |
| N | 7.80796224909479  | 10.50910207848438 | 16.54546719678325 |
| C | 5.56270779577393  | 12.38711906946637 | 16.72559363973549 |
| C | 8.36166284201990  | 12.79636875830263 | 17.48715603937040 |
| C | 9.10755216874297  | 10.87968672223608 | 16.38497844141196 |
| C | 5.31469122231296  | 12.16519489529179 | 15.35906309818555 |
| C | 4.83784844561795  | 13.37775072545634 | 17.41563244457642 |
| N | 9.43752803560028  | 12.11895142355820 | 16.82874747397015 |
| C | 8.23388200893163  | 14.24231005710432 | 17.63780734350719 |
| C | 10.06225375533302 | 9.90883315878333  | 15.83548713459795 |
| H | 5.92101975361687  | 11.43267122490973 | 14.82231432878757 |
| C | 4.34940906705034  | 12.92045034005177 | 14.69316270648613 |
| C | 3.89877126579249  | 14.15423571620139 | 16.73049910160304 |
| H | 5.04172532368208  | 13.58626241068964 | 18.46632109451114 |
| C | 10.76703113185031 | 12.72568800534086 | 16.75853469688381 |
| C | 8.54567988731350  | 15.14076185662576 | 16.59480951085411 |
| C | 7.68710972550334  | 14.77781985891477 | 18.82164673118830 |
| C | 9.64987953724063  | 9.09413664287365  | 14.76501175382368 |
| C | 11.33720222787406 | 9.70210020344886  | 16.39373456741838 |
| H | 4.17164525486956  | 12.75698037726715 | 13.62929105869178 |
| C | 3.64929845161341  | 13.92537767279359 | 15.37410027720820 |
| H | 3.38352636257342  | 14.96223637044279 | 17.25187616439483 |
| H | 11.33521967051238 | 12.26608023626640 | 15.94504536600398 |
| H | 10.66600786236602 | 13.79865144954027 | 16.56738243125935 |
| H | 11.30812249831237 | 12.60040773372449 | 17.70804518821294 |
| H | 8.91556802448138  | 14.75516031948277 | 15.64343838300179 |
| C | 8.34231311503885  | 16.51073616312129 | 16.74650716961175 |
| C | 7.45559464865486  | 16.14653000808475 | 18.96196102520410 |
| H | 7.46370807729230  | 14.10960976640021 | 19.65858162441199 |
| H | 8.65537082129527  | 9.24012511159421  | 14.34391286794128 |
| C | 10.50399537046227 | 8.12539055411814  | 14.24513999065729 |
| C | 12.18530546028819 | 8.72244656327410  | 15.87676938977012 |
| H | 11.66865624312670 | 10.29291808523156 | 17.24770489709552 |
| H | 2.93227691729975  | 14.54854271867688 | 14.83857259909056 |
| H | 8.59681424322669  | 17.18604000133229 | 15.92858907512145 |
| C | 7.79285858149117  | 17.02145258800883 | 17.92734077258557 |
| H | 7.03806198682672  | 16.53420803453060 | 19.89220946750552 |
| H | 10.18059825311663 | 7.51508327037766  | 13.40126822551584 |
| C | 11.77539575981953 | 7.93671327127114  | 14.79711323565628 |
| H | 13.17062753796033 | 8.57250109740248  | 16.31929372103568 |
| H | 7.63408831046201  | 18.09389463233722 | 18.04025791259288 |
| H | 12.44333370437757 | 7.17849428544163  | 14.38783259400600 |
| C | 6.52850206835880  | 10.92484005438662 | 19.12714328882639 |
| C | 7.72570456714689  | 10.14890880980546 | 19.57453894503405 |
| C | 5.12689910944104  | 10.30824708050222 | 19.22409148022834 |
| H | 6.51314461198502  | 11.83451355917065 | 19.75006956957227 |
| N | 8.68303004103303  | 10.89440421502099 | 20.14911309675162 |
| N | 7.91687454220655  | 8.84503341093165  | 19.35591830303457 |

|   |                   |                   |                    |
|---|-------------------|-------------------|--------------------|
| H | 4.41916893163966  | 11.12313890781501 | 19.01131728792478  |
| H | 4.94636877830177  | 10.01763756711853 | 20.27258487306040  |
| C | 4.82517179917483  | 9.11889598083781  | 18.31698377883391  |
| C | 10.01417050309557 | 10.40880775157203 | 20.50921654696639  |
| C | 7.13129170033563  | 8.03157218922678  | 18.392845666161897 |
| C | 9.18183662496410  | 8.19270607838141  | 19.77245085754304  |
| H | 5.02074527320978  | 9.38579978039898  | 17.26335996499898  |
| H | 3.75239571700795  | 8.8836553866782   | 18.39752215456230  |
| C | 5.64182204277871  | 7.87988385191694  | 18.67468563071497  |
| C | 9.88492546526337  | 8.94282740209187  | 20.89134215496732  |
| H | 10.38656970115015 | 11.01822737122517 | 21.34198528829932  |
| H | 10.70091724089832 | 10.53722806310129 | 19.65660151741224  |
| H | 7.60138781221093  | 7.04174770156023  | 18.41837562307208  |
| H | 7.29970197910713  | 8.45870344456641  | 17.39082374149110  |
| H | 9.82787097641310  | 8.10793454920681  | 18.88257587733832  |
| H | 8.92408103350014  | 7.17481481493024  | 20.09453702957941  |
| H | 5.47538674477612  | 7.59992112399281  | 19.72779863048100  |
| H | 5.29680555757724  | 7.02752669722770  | 18.06981200528352  |
| H | 10.87458128253359 | 8.49968373347986  | 21.05921009101871  |
| H | 9.31801151728932  | 8.85248868479606  | 21.82943175089820  |
| H | -1.26072232912390 | 11.32613666623394 | 16.43495170282806  |
| C | -0.22582625269178 | 11.08618745891704 | 16.22091628133364  |
| N | 0.82458049987913  | 11.68787984060971 | 16.89146566742106  |
| C | 0.31983028968604  | 10.21219588746788 | 15.32393350488299  |
| C | 1.97955262638601  | 11.19655318720990 | 16.41515102259364  |
| C | 0.69785218060194  | 12.69938154023100 | 17.94447980195652  |
| N | 1.69444306997738  | 10.29502689384982 | 15.46179973713151  |
| H | -0.15004870732182 | 9.54780974358379  | 14.60829936398257  |
| H | 2.97481089298945  | 11.49121691345266 | 16.73243730551892  |
| H | 1.70032460611621  | 13.02397820697188 | 18.23876037653699  |
| H | 0.13499442702303  | 13.55830426510359 | 17.56077402922022  |
| H | 0.17516397740179  | 12.26999530981519 | 18.80751091145676  |
| C | 2.67858819014149  | 9.53191841505598  | 14.69039328440554  |
| H | 3.68108483624219  | 9.84704990666228  | 14.99490071572195  |
| H | 2.54799988669563  | 8.46063845925184  | 14.88435208872397  |
| H | 2.54177872032420  | 9.73335639667470  | 13.62139393649891  |
| H | 8.51149692057921  | 11.89601980611287 | 20.18372411487150  |

TS3 +HLc

|   |                   |                   |                   |
|---|-------------------|-------------------|-------------------|
| P | 6.77146461996454  | 11.43930396251038 | 17.49226585808532 |
| N | 7.51436924480451  | 10.33546147553489 | 16.53375412058414 |
| C | 5.30054473811574  | 12.18599107553025 | 16.77803667192739 |
| C | 8.14201406126372  | 12.54863238735229 | 17.74245939785650 |
| C | 8.79355173144326  | 10.75551819359232 | 16.34398500400374 |
| C | 5.06426712291035  | 11.99530019906724 | 15.40717891589093 |
| C | 4.58573512880885  | 13.16697064979993 | 17.48584251341241 |
| N | 9.14142548800261  | 11.95890750583798 | 16.85724530503437 |
| C | 7.86625263979880  | 14.00659795197158 | 17.68144570559466 |
| C | 9.73190750892251  | 9.87826652994923  | 15.62900871339302 |
| H | 5.66471910864177  | 11.26513807217919 | 14.86132655085046 |
| C | 4.11404436005096  | 12.77923259315143 | 14.75176230275967 |
| C | 3.64739675542501  | 13.95525090457876 | 16.81926465372693 |
| H | 4.79175864801160  | 13.35626112245676 | 18.54010084742394 |
| C | 10.42352480485504 | 12.64025131617135 | 16.68661096036425 |
| C | 7.79913257806105  | 14.69799327498419 | 16.45763818020015 |
| C | 7.55545833959208  | 14.69924097210588 | 18.86275198716304 |
| C | 9.26581177204286  | 9.15961204507007  | 14.51417190219730 |
| C | 11.05463955808981 | 9.68579967249688  | 16.06491413503837 |
| H | 3.95633083116826  | 12.65625510176543 | 13.67897843880286 |
| C | 3.41350646374281  | 13.76562376329974 | 15.45366916558198 |
| H | 3.13025392470039  | 14.74877034836089 | 17.36016400148497 |
| H | 10.92483053089405 | 12.26294608715157 | 15.79104860960047 |
| H | 10.23958216297773 | 13.71503563049666 | 16.57333105587062 |
| H | 11.07072418061832 | 12.49327210552338 | 17.56399068369239 |
| H | 8.01698332836737  | 14.16954215736978 | 15.52692737415196 |
| C | 7.44197202498568  | 16.04475852608432 | 16.42107853200674 |
| C | 7.17571134996498  | 16.04291257509011 | 18.82373417263530 |
| H | 7.63195788611350  | 14.18375424602189 | 19.82284400920226 |
| H | 8.23251296763562  | 9.29143785948567  | 14.19444022994133 |
| C | 10.11770898383378 | 8.29908930982052  | 13.82725844294369 |
| C | 11.89878456201694 | 8.80934084053248  | 15.38428558374184 |
| H | 11.42267628191442 | 10.20227974174580 | 16.95113708971003 |
| H | 2.71432945500084  | 14.41619004827544 | 14.92608344875375 |
| H | 7.40697063591334  | 16.57085274949934 | 15.46617595743117 |
| C | 7.12188867029835  | 16.71993712820564 | 17.60367916293043 |
| H | 6.9464277983070   | 16.56884298170592 | 19.75137814024712 |
| H | 9.75478392167540  | 7.76098288805570  | 12.95111862377637 |
| C | 11.43636904818124 | 8.12269060874033  | 14.25897949011910 |

|   |                   |                   |                    |
|---|-------------------|-------------------|--------------------|
| H | 12.92073282610771 | 8.66102142709320  | 15.73406722456508  |
| H | 6.84484858770846  | 17.77405963438231 | 17.57408756930182  |
| H | 12.10141361956765 | 7.44606712888118  | 13.72173494144041  |
| C | 6.33796600378848  | 10.78072754874580 | 19.18474217614183  |
| C | 7.62428675336110  | 10.16688556536256 | 19.69428808189866  |
| C | 4.99031810256952  | 10.06832099306464 | 19.34134654614115  |
| H | 6.25703980311321  | 11.72336507421272 | 19.75180744420121  |
| N | 8.53202084039250  | 11.09361331069949 | 19.99749900030621  |
| N | 7.84305218622820  | 8.84163214466510  | 19.75946912469264  |
| H | 4.22249062185879  | 10.79439382276437 | 19.03241495016204  |
| H | 4.82507696181227  | 9.89406858884884  | 20.41721752795911  |
| C | 4.79442838098783  | 8.75792065197485  | 18.58533323093515  |
| C | 9.88253523761602  | 10.70220585513964 | 20.40344070778912  |
| C | 7.15872042272780  | 7.84850324015500  | 18.89392561892820  |
| C | 9.11539111350137  | 8.34670238504777  | 20.33276491556153  |
| H | 5.01317157789363  | 8.89925774676015  | 17.51126833579746  |
| H | 3.73647205389381  | 8.46231421925748  | 18.66741563982164  |
| C | 5.66906302542920  | 7.62987086020611  | 19.12722859068514  |
| C | 9.80186977565172  | 9.39951295490615  | 21.18782755628386  |
| H | 10.30675645987235 | 11.51647676851640 | 21.00539824305906  |
| H | 10.52489849028290 | 10.57651737731970 | 19.51389429035289  |
| H | 7.68698054161266  | 6.90555313847194  | 19.07916905264996  |
| H | 7.34171968569613  | 8.12910132253956  | 17.84299898053203  |
| H | 9.77071239081401  | 8.02874758197355  | 19.50407463382776  |
| H | 8.87626138221169  | 7.45143699531832  | 20.92533827283427  |
| H | 5.47154440300892  | 7.47579777139249  | 20.20035959459254  |
| H | 5.40493181952548  | 6.68825509964668  | 18.62227797218854  |
| H | 10.80259015916050 | 9.04530103693251  | 21.46743314900257  |
| H | 9.23997561173634  | 9.56482767371608  | 22.11926488148221  |
| H | 2.80825212000803  | 9.82321830011540  | 16.61572358310474  |
| C | 2.01485593126170  | 10.50458897822454 | 16.33580381844264  |
| N | 1.52324036150508  | 10.56695877109686 | 15.04621049995805  |
| C | 1.32215696693020  | 11.42217398827460 | 17.07424438324473  |
| C | 0.56132263788324  | 11.50145748433758 | 14.99908117425787  |
| C | 1.97827805728824  | 9.74825985478481  | 13.91912232770803  |
| N | 0.41885534264384  | 12.03117125853792 | 16.22377769872742  |
| H | 1.39130097495287  | 11.68812118725574 | 18.12124298529500  |
| H | -0.01403744521258 | 11.77352891880713 | 14.121422203517889 |
| H | 1.457837575971078 | 10.06721372885214 | 13.01072893234892  |
| H | 3.05826797652546  | 9.88350895966403  | 13.78966718651913  |
| H | 1.75388555260840  | 8.69312210746234  | 14.11559560849249  |
| C | -0.53557704524082 | 13.08088309822797 | 16.59685233010849  |
| H | -1.09960434732873 | 13.38361257135985 | 15.70917935011168  |
| H | -1.22857027278709 | 12.69522224367411 | 17.35389008812837  |
| H | 0.00976676412831  | 13.94414940566587 | 16.99553432890866  |
| H | 8.43859557835316  | 11.96077122409176 | 19.19121347819741  |

11' +HLc

|   |                   |                   |                   |
|---|-------------------|-------------------|-------------------|
| P | 6.61766381434919  | 11.54839008714316 | 17.77451228585565 |
| N | 7.42381909684179  | 10.55914898591887 | 16.74232067453090 |
| N | 9.14485226578429  | 11.87123725046822 | 17.60198672352207 |
| C | 5.36350779418004  | 12.52107928116202 | 16.93621457411816 |
| C | 5.25571957079010  | 12.42471710064959 | 15.54104137358610 |
| H | 5.87629049384008  | 11.70276245450990 | 15.00798055245234 |
| C | 4.39196844860745  | 13.28004648993451 | 14.85287635326553 |
| H | 4.32026478401948  | 13.22265885886906 | 13.76598739582488 |
| C | 3.65365403094858  | 14.24006540434613 | 15.55336123319571 |
| H | 3.00548511552989  | 14.92955074253030 | 15.01117410342473 |
| C | 3.76449981406742  | 14.33695645852303 | 16.94560992349168 |
| H | 3.21355584298889  | 15.10875000261929 | 17.48441950036451 |
| C | 4.61245697119820  | 13.47477770142488 | 17.64232497639718 |
| H | 4.71984372475527  | 13.58109621327271 | 18.72264627257062 |
| C | 8.06583452325001  | 12.59911448614144 | 18.29995362837197 |
| H | 8.17977821016160  | 12.46239680445940 | 19.39131631925335 |
| C | 7.90952806821626  | 14.04272583482062 | 17.91436581226101 |
| C | 7.99053969722131  | 14.44413444863281 | 16.57369087214829 |
| H | 8.26208583601476  | 13.72033298672257 | 15.80227850375501 |
| C | 7.73568090939703  | 15.76934221448176 | 16.22405571566954 |
| H | 7.81366795835788  | 16.08133266154638 | 15.18211049084121 |
| C | 7.38995842337780  | 16.70010685854284 | 17.20937070010775 |
| H | 7.19745586803307  | 17.73768354686372 | 16.93523643134995 |
| C | 7.31570552944323  | 16.30544179963031 | 18.54704827168468 |
| H | 7.07149083540475  | 17.03449890391063 | 19.32021855560253 |
| C | 7.57782490872224  | 14.97964767897503 | 18.90016230016569 |
| H | 7.53801341352243  | 14.67270554037682 | 19.94767954544472 |
| C | 10.50657033841703 | 12.38573269397747 | 17.74641584715576 |
| C | 8.74124323542579  | 10.81066142865671 | 16.86088482770906 |
| C | 9.69481260000032  | 9.91199435012002  | 16.19389306139978 |

|   |                   |                   |                   |
|---|-------------------|-------------------|-------------------|
| C | 9.40277220947494  | 9.45581655269076  | 14.89751873680407 |
| H | 8.50057623077637  | 9.80904024108304  | 14.39897656059736 |
| C | 10.26983477644559 | 8.57413554387312  | 14.25801451742655 |
| H | 10.05447676732117 | 8.24099906635202  | 13.24257148928678 |
| C | 11.41324735099889 | 8.11243307074045  | 14.91822233608020 |
| H | 12.08741848468923 | 7.41665729926481  | 14.41799474184962 |
| C | 11.68983081921988 | 8.53557879531806  | 16.22112790885971 |
| H | 12.57027218455139 | 8.16075668040694  | 16.74331544009132 |
| C | 10.84090567496978 | 9.43975899625350  | 16.85678541478374 |
| H | 11.05207757963315 | 9.75102500618464  | 17.87963207822088 |
| H | 11.13484402836401 | 12.00816841946117 | 16.93477460020474 |
| H | 10.47254776658687 | 13.48132446178776 | 17.69247089904698 |
| H | 10.93683052367639 | 12.09377494500225 | 18.71512854238986 |
| C | 5.93004383307316  | 10.75473588540272 | 19.27396881949478 |
| C | 7.05168306877756  | 9.93490975654675  | 19.92302764725520 |
| C | 4.52107534139632  | 10.15264312532286 | 19.15215053109133 |
| N | 7.79161339644331  | 10.63683266586619 | 20.72722072355770 |
| N | 7.15920609643317  | 8.59524077361969  | 19.64945587526034 |
| H | 3.83016530329256  | 10.98345814925397 | 18.93781933134657 |
| H | 4.24870724134797  | 9.77809526653533  | 20.15222806971523 |
| C | 4.32383816603904  | 9.04493416522589  | 18.11892033794664 |
| C | 8.88485744795100  | 9.95558582265132  | 21.41680413005290 |
| C | 6.60575909214479  | 7.93311600674178  | 18.45789592848422 |
| C | 8.17434772852021  | 7.81278289338215  | 20.37929056708603 |
| H | 4.62706206121129  | 9.41046282144016  | 17.12020589594085 |
| H | 3.24693498854350  | 8.81693111411270  | 18.05967616011729 |
| C | 5.08682185325694  | 7.75966777165376  | 18.43981781274206 |
| C | 8.55468199290902  | 8.48948635407894  | 21.68686850596219 |
| H | 9.08679934607007  | 10.49649412805622 | 22.35181763755867 |
| H | 9.80614685835793  | 10.03293994784508 | 20.80882163720232 |
| H | 7.07094191827854  | 6.93948757097301  | 18.43400768632578 |
| H | 6.93560140727799  | 8.45642370102606  | 17.54567185710424 |
| H | 9.06403189007604  | 7.67919689725953  | 19.73760919032058 |
| H | 7.75362463562357  | 6.81303101511353  | 20.56498910894067 |
| H | 4.74790246824805  | 7.35275274348406  | 19.40630690706476 |
| H | 4.84782305640855  | 7.00087254601390  | 17.67827566174588 |
| H | 9.40428474447942  | 7.96249586927126  | 22.14196851524004 |
| H | 7.71557933174539  | 8.43240238120441  | 22.39704016676495 |
| H | 5.86301959357279  | 11.62077427125413 | 19.95578615008515 |
| N | 1.76805095847356  | 9.96582268297927  | 15.71979123838630 |
| N | 0.97262165396477  | 11.07881873340732 | 17.41402873776606 |
| C | 1.90920280628483  | 11.08189486639215 | 16.45185885136120 |
| C | 2.59443269644050  | 9.59370086790009  | 14.56825506784666 |
| H | 3.39086830186953  | 10.33540437804975 | 14.45465025349935 |
| C | 0.71472192982817  | 9.22899050442715  | 16.23025061424084 |
| C | 0.21537782344735  | 9.92744736112451  | 17.29379365617805 |
| C | 0.77452569834837  | 12.13461945655412 | 18.41185113150623 |
| H | 1.55239532105556  | 12.89277382410427 | 18.27709931621670 |
| H | -0.21236017680048 | 12.59213512693481 | 18.27355377203711 |
| H | 0.84541765056107  | 11.70607415727371 | 19.41835269536890 |
| H | -0.60908571508981 | 9.70590002613462  | 17.96143014508952 |
| H | 0.40771946000675  | 8.28378670851641  | 15.79805595648121 |
| H | 3.03558526240551  | 8.60511279362191  | 14.73984091569488 |
| H | 1.97726106289090  | 9.57250441891137  | 13.66212674791853 |
| H | 2.64678315525987  | 11.86045976268143 | 16.28455741483543 |
